# Supplementary material for: New insights into the proteins interacting with the promoters of silkworm fibroin genes
Source: Research Square preprint supplement (doi:10.21203/rs.3.rs-400247/v1), 2021-04-12
Supplement: Supplementary file 1 [file 5f4e907b58ed1790d5d1b42d.pdf]

## Supplementary information

### New insights into the proteins interacting with the promoters of silkworm fibroin genes

Yan Ma<sup>1†</sup>, Qin Luo<sup>1†</sup>, Yao Ou<sup>1</sup>, Yiyun Tang<sup>1</sup>, Wenhui Zeng<sup>1</sup>, Haomiao Wang<sup>1</sup>, Jie Hu<sup>1</sup>, Hanfu Xu<sup>1\*</sup>

<sup>1</sup>State Key Laboratory of Silkworm Genome Biology, College of Sericulture, Textile and Biomass Sciences, Southwest University, Chongqing, 400715, China

\*Corresponding. xuhf@swu.edu.cn

<sup>†</sup>These authors contributed equally to this work.

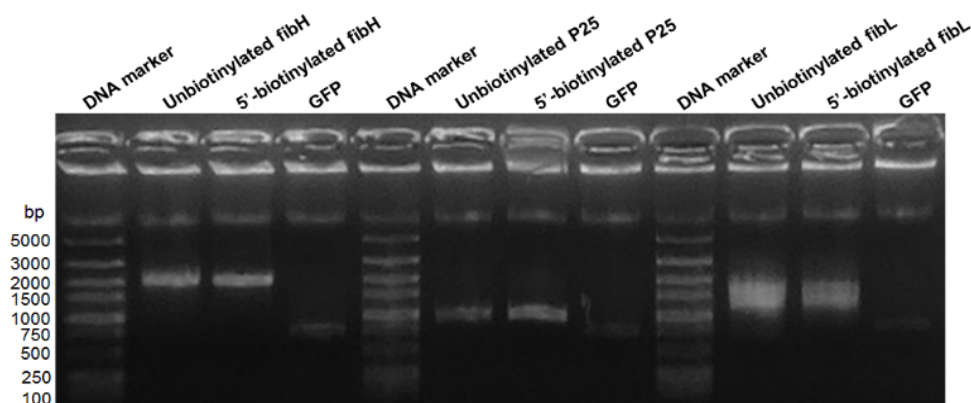

Supplementary Figure S1. Agarose gel electrophoresis of 5'-biotinylated and unbiotinylated DNA probes.

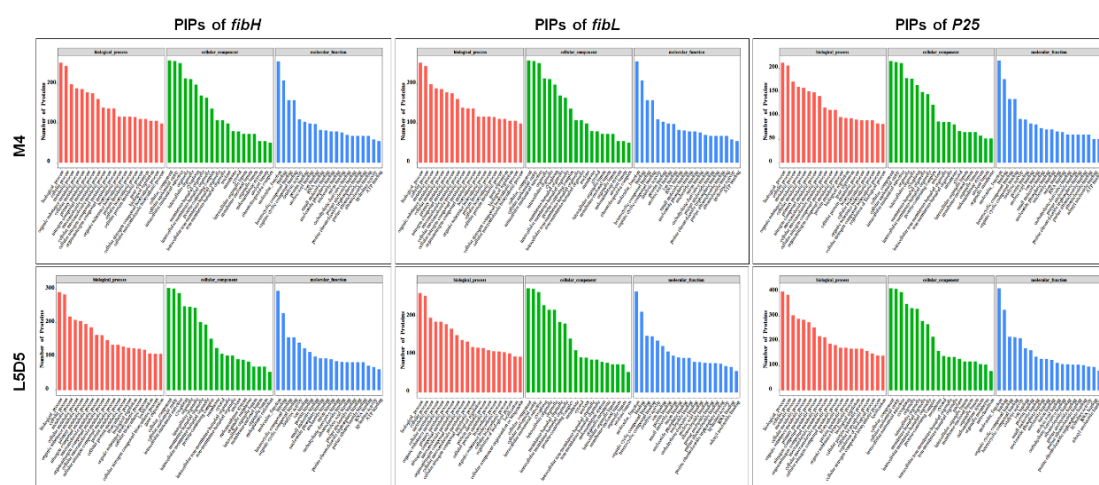

Supplementary Figure S2. GO annotation of candidate PIPs identified by HPLC-MS.

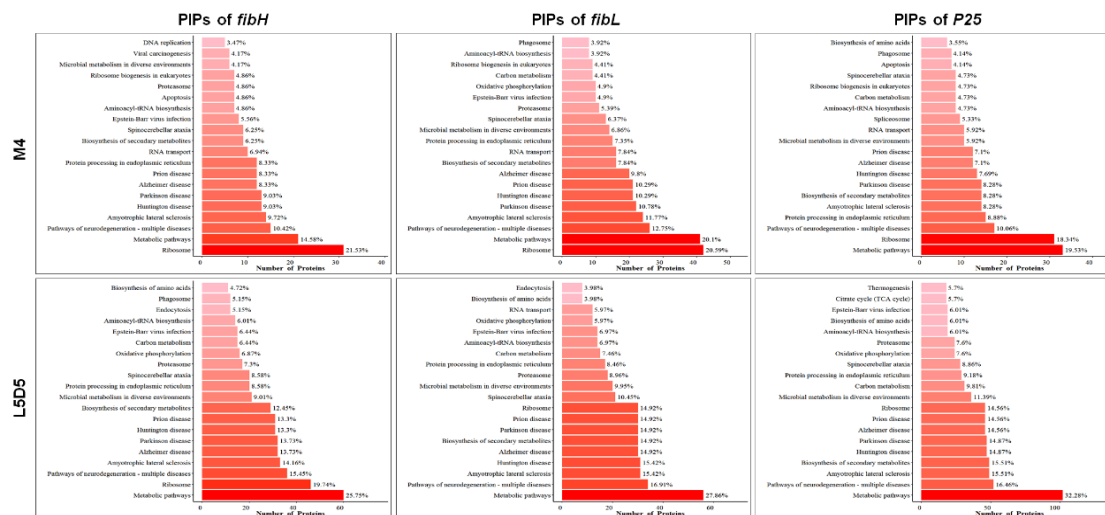

**Supplementary Figure S3. KEGG pathway annotation of candidate PIPs identified by HPLC-MS.**

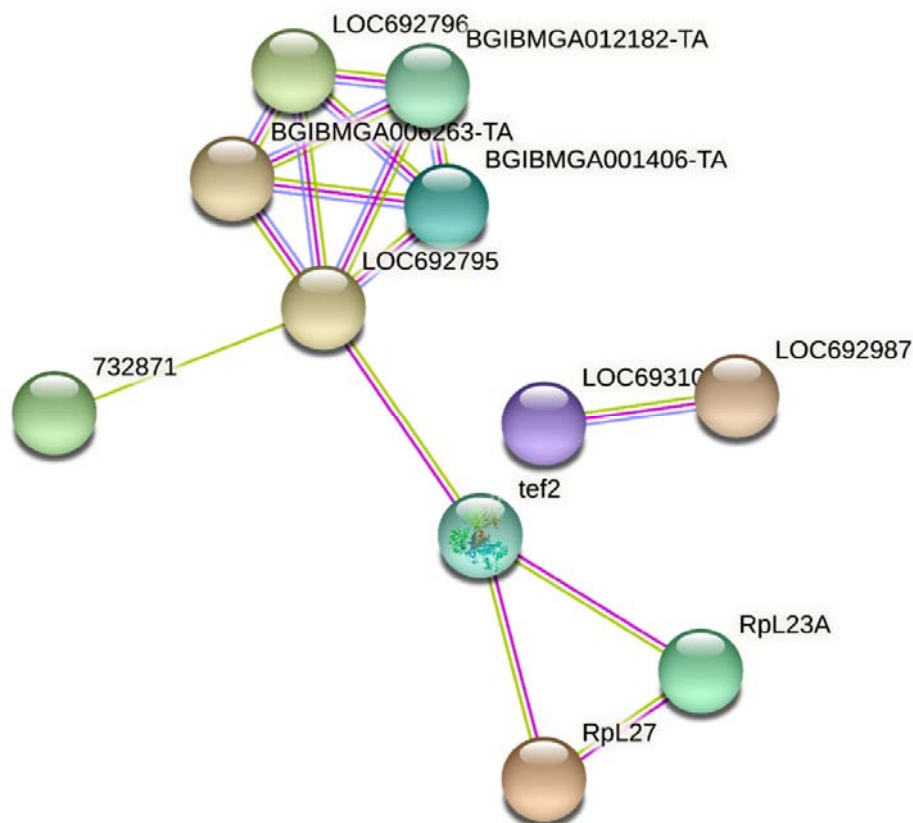

**Supplementary Figure S4. Protein-protein interaction networks among the TFs interacting with fibroin gene promoters.** Colored lines represent interaction relationships between the nodes generated based on the available evidence in the STRING database. Minimum required interaction score: high confidence (0.700); PPI enrichment  $p$ -value:  $1.71 \times 10^{-8}$ .

**Supplementary Table S1. Summary of the identified PIPs of fibroin genes.**

**Supplementary Table S2. Common PIPs of each fibroin gene in the M4 and L5D5 PSGs.**

**Supplementary Table S3. Unique PIPs of each fibroin gene in the M4 and L5D5 PSGs.**

**Supplementary Table S4. Common PIPs shared by the three fibroin genes.**

**Supplementary Table S5. Primer sequences used in this study.**

| Name    | Primer sequences (5' → 3')   |
|---------|------------------------------|
| fibH-BF | bio-GGTACCAGATAACGGATATAAATG |
| fibH-F  | GGTACCAGATAACGGATATAAATG     |
| fibH-R  | GCTAGCCTTGAGAGTTGG           |
| fibL-BF | bio-TAACAAAGTGGTGCCTATCC     |
| fibL-F  | TAACAAAGTGGTGCCTATCC         |
| fibL-R  | TTTAGTGGTCTGTTATGTGACCAATC   |
| P25-BF  | bio-CGCCACTGAGTCGCATTA       |
| P25-F   | CGCCACTGAGTCGCATTA           |
| P25-R   | GTTGCGCGAATAATAACAACACTG     |
| GFP-F   | ATGGAGAGCGACGAGAGC           |
| GFP-R   | GCGAGATCCGGTGGAGCC           |
