# Supplementary material for: New insights into the proteins interacting with the promoters of silkworm fibroin genes
Source: Research Square preprint supplement (doi:10.21203/rs.3.rs-400247/v1), 2021-04-12
Supplement: Supplementary file 1 [file 203927edd6ee746ee62372da.xlsx]

## Sheet: common PIPs of fibH
Name	Bombyx-mori	Subject ID	Description	e-value	identity(%)	coverage(%)	Metazoa	Subject ID	Description	e-value	identity(%)	coverage(%)
P_KWMTBOMO00339		tr|H9ITE6|H9ITE6_BOMMO	CSD_1 domain-containing protein OS=Bombyx mori OX=7091 PE=4 SV=1	0	100	100		sp|P41824|YBOXH_APLCA	Y-box factor homolog OS=Aplysia californica OX=6500 PE=2 SV=1	1.24e-50	69.106	47.4903
P_KWMTBOMO00462		tr|D9N4J4|D9N4J4_BOMMO	Staphylococcal nuclease domain-containing protein OS=Bombyx mori OX=7091 GN=Tudor-SN PE=2 SV=1	0	99.887	100		sp|Q9W0S7|SND1_DROME	Staphylococcal nuclease domain-containing protein 1 OS=Drosophila melanogaster OX=7227 GN=Tudor-SN PE=1 SV=1	0	52.412	100
P_KWMTBOMO00497		tr|H9JRZ9|H9JRZ9_BOMMO	Uncharacterized protein OS=Bombyx mori OX=7091 PE=3 SV=1	0	100	100		sp|Q60HD7|SERA_MACFA	D-3-phosphoglycerate dehydrogenase OS=Macaca fascicularis OX=9541 GN=PHGDH PE=2 SV=4	2.42e-109	50.814	93.8838
P_KWMTBOMO00638		tr|D2Y4R4|D2Y4R4_BOMMO	Coatomer subunit beta' OS=Bombyx mori OX=7091 GN=COPB2 PE=2 SV=1	0	99.877	99.2692		sp|O62621|COPB2_DROME	Coatomer subunit beta' OS=Drosophila melanogaster OX=7227 GN=beta'COP PE=2 SV=2	0	71.059	98.9038
P_KWMTBOMO00793		tr|H9JJJ8|H9JJJ8_BOMMO	Uncharacterized protein OS=Bombyx mori OX=7091 GN=101743807 PE=3 SV=1	0	100	100		sp|Q68FQ0|TCPE_RAT	T-complex protein 1 subunit epsilon OS=Rattus norvegicus OX=10116 GN=Cct5 PE=1 SV=1	0	70.391	99.0775
P_KWMTBOMO00927		tr|H9JJU3|H9JJU3_BOMMO	Aspartate--tRNA ligase, cytoplasmic OS=Bombyx mori OX=7091 PE=3 SV=1	0	100	71.2204		sp|Q3SYZ4|SYDC_BOVIN	Aspartate--tRNA ligase, cytoplasmic OS=Bos taurus OX=9913 GN=DARS1 PE=2 SV=1	0	64.329	90.8925
P_KWMTBOMO01075		tr|H9JCV2|H9JCV2_BOMMO	Uncharacterized protein OS=Bombyx mori OX=7091 GN=101741707 PE=3 SV=1	0	99.629	100		sp|O02649|CH60A_DROME	Heat shock protein 60A OS=Drosophila melanogaster OX=7227 GN=Hsp60A PE=1 SV=3	0	84.72	95.9184
P_KWMTBOMO01114		tr|H9JCT5|H9JCT5_BOMMO	26S proteasome regulatory subunit 7 OS=Bombyx mori OX=7091 GN=101744256 PE=3 SV=1	0	100	100		sp|P35998|PRS7_HUMAN	26S proteasome regulatory subunit 7 OS=Homo sapiens OX=9606 GN=PSMC2 PE=1 SV=3	0	91.014	100
P_KWMTBOMO01148		tr|Q2F5M4|Q2F5M4_BOMMO	Receptor for activated protein kinase C RACK isoform 1 OS=Bombyx mori OX=7091 PE=2 SV=1	0	100	100		sp|O18640|GBLP_DROME	Guanine nucleotide-binding protein subunit beta-like protein OS=Drosophila melanogaster OX=7227 GN=Rack1 PE=1 SV=2	0	86.52	100
P_KWMTBOMO01273		tr|Q5UAS5|Q5UAS5_BOMMO	60S ribosomal protein L13a OS=Bombyx mori OX=7091 GN=RpL13A PE=2 SV=1	3.08e-151	100	100		sp|Q8MUR4|RL13A_CHOPR	60S ribosomal protein L13a OS=Choristoneura parallela OX=106495 GN=RpL13A PE=2 SV=1	3.13e-140	91.667	100
P_KWMTBOMO01312		tr|Q2F5N7|Q2F5N7_BOMMO	26S proteasome regulatory subunit RPN11 OS=Bombyx mori OX=7091 PE=2 SV=1	0	100	100		sp|Q9V3H2|PSDE_DROME	26S proteasome non-ATPase regulatory subunit 14 OS=Drosophila melanogaster OX=7227 GN=Rpn11 PE=1 SV=1	0	92.926	100
P_KWMTBOMO01606		tr|H9J993|H9J993_BOMMO	Nop domain-containing protein OS=Bombyx mori OX=7091 GN=101742458 PE=3 SV=1	0	99.436	100		sp|Q9Y2X3|NOP58_HUMAN	Nucleolar protein 58 OS=Homo sapiens OX=9606 GN=NOP58 PE=1 SV=1	0	63.377	86.2004
P_KWMTBOMO01720		tr|H9J930|H9J930_BOMMO	Uncharacterized protein OS=Bombyx mori OX=7091 PE=4 SV=1	0	98.191	100		sp|Q26457|LA_AEDAL	La protein homolog OS=Aedes albopictus OX=7160 PE=1 SV=1	2.92e-91	44.225	93.4211
P_KWMTBOMO01918		tr|Q2F5L5|Q2F5L5_BOMMO	Protein transport protein Sec61 subunit beta OS=Bombyx mori OX=7091 GN=733070 PE=2 SV=1	1.66e-65	100	100		sp|P60467|SC61B_CANLF	Protein transport protein Sec61 subunit beta OS=Canis lupus familiaris OX=9615 GN=SEC61B PE=1 SV=2	2.67e-41	71.277	96.9072
P_KWMTBOMO02081		tr|Q1HPW2|Q1HPW2_BOMMO	RNA helicase OS=Bombyx mori OX=7091 GN=692781 PE=2 SV=1	0	100	100		sp|Q02748|IF4A_DROME	Eukaryotic initiation factor 4A OS=Drosophila melanogaster OX=7227 GN=eIF4A PE=1 SV=3	0	79.949	93.8095
P_KWMTBOMO02431		tr|Q1HQ25|Q1HQ25_BOMMO	ATP synthase subunit OS=Bombyx mori OX=7091 GN=732934 PE=2 SV=1	2.04e-70	100	100		sp|Q5RFH0|ATP5L_PONAB	ATP synthase subunit g, mitochondrial OS=Pongo abelii OX=9601 GN=ATP5MG PE=3 SV=1	1.02e-32	52.632	95.9596
P_KWMTBOMO02470		tr|H9IZ85|H9IZ85_BOMMO	Dolichyl-diphosphooligosaccharide--protein glycosyltransferase subunit 1 OS=Bombyx mori OX=7091 PE=3 SV=1	0	100	98.9316		sp|E2RQ08|RPN1_CANLF	Dolichyl-diphosphooligosaccharide--protein glycosyltransferase subunit 1 OS=Canis lupus familiaris OX=9615 GN=RPN1 PE=1 SV=1	6.16e-166	53.811	92.5214
P_KWMTBOMO02835		tr|H9J2D4|H9J2D4_BOMMO	RPN13_C domain-containing protein OS=Bombyx mori OX=7091 PE=3 SV=1	0	97.136	100		sp|Q6NZ09|ADRM1_DANRE	Proteasomal ubiquitin receptor ADRM1 OS=Danio rerio OX=7955 GN=adrm1b PE=1 SV=1	1.84e-92	45.524	96.0688
P_KWMTBOMO03067		tr|H9J8B0|H9J8B0_BOMMO	Tripeptidyl-peptidase 2 OS=Bombyx mori OX=7091 GN=101742969 PE=4 SV=1	0	100	100		sp|P29144|TPP2_HUMAN	Tripeptidyl-peptidase 2 OS=Homo sapiens OX=9606 GN=TPP2 PE=1 SV=4	0	41.24	100
P_KWMTBOMO03177		tr|H9JV99|H9JV99_BOMMO	BRO1 domain-containing protein OS=Bombyx mori OX=7091 PE=4 SV=1	0	97.718	100		sp|Q9QZA2|PDC6I_RAT	Programmed cell death 6-interacting protein OS=Rattus norvegicus OX=10116 GN=Pdcd6ip PE=1 SV=2	0	43.273	98.3629
P_KWMTBOMO03314		tr|Q5UAS3|Q5UAS3_BOMMO	Ribosomal protein L15 OS=Bombyx mori OX=7091 GN=RpL15 PE=2 SV=1	2.87e-148	100	100		sp|P30736|RL15_CHITE	60S ribosomal protein L15 OS=Chironomus tentans OX=7153 GN=RpL15 PE=3 SV=3	3.13e-122	80.392	100
P_KWMTBOMO03626		tr|H9J9S0|H9J9S0_BOMMO	CCT-alpha OS=Bombyx mori OX=7091 GN=101742382 PE=3 SV=1	0	100	100		sp|P12613|TCPA_DROME	T-complex protein 1 subunit alpha OS=Drosophila melanogaster OX=7227 GN=CCT1 PE=2 SV=2	0	80.576	100
P_KWMTBOMO03986		tr|Q9NL60|Q9NL60_BOMMO	Annexin OS=Bombyx mori OX=7091 PE=2 SV=1	0	99.69	100		sp|P22464|ANXB9_DROME	Annexin B9 OS=Drosophila melanogaster OX=7227 GN=AnxB9 PE=2 SV=2	9.67e-180	76.012	99.3808
P_KWMTBOMO04370		tr|H9J6V7|H9J6V7_BOMMO	OBG-type G domain-containing protein OS=Bombyx mori OX=7091 PE=4 SV=1	2.07e-172	99.156	64.5777		sp|P32234|128UP_DROME	GTP-binding protein 128up OS=Drosophila melanogaster OX=7227 GN=128up PE=2 SV=2	0	89.946	100
P_KWMTBOMO04502		tr|Q5TLD3|Q5TLD3_BOMMO	Replication protein A subunit OS=Bombyx mori OX=7091 GN=BmRPA1 PE=2 SV=1	0	99.498	100		sp|Q24492|RFA1_DROME	Replication protein A 70 kDa DNA-binding subunit OS=Drosophila melanogaster OX=7227 GN=RpA-70 PE=1 SV=1	0	47.421	100
P_KWMTBOMO04605		tr|H9J7K1|H9J7K1_BOMMO	2-phospho-D-glycerate hydro-lyase OS=Bombyx mori OX=7091 PE=3 SV=1	0	100	100		sp|P15007|ENO_DROME	Enolase OS=Drosophila melanogaster OX=7227 GN=Eno PE=1 SV=2	0	81.481	99.7691
P_KWMTBOMO04610		tr|H9J723|H9J723_BOMMO	26S proteasome non-ATPase regulatory subunit 2 OS=Bombyx mori OX=7091 PE=3 SV=1	0	97.303	100		sp|Q5R9I6|PSMD2_PONAB	26S proteasome non-ATPase regulatory subunit 2 OS=Pongo abelii OX=9601 GN=PSMD2 PE=2 SV=1	0	55.556	98.0583
P_KWMTBOMO04806		tr|H9JK60|H9JK60_BOMMO	Ubiquitin-activating enzyme E1 OS=Bombyx mori OX=7091 GN=101739389 PE=3 SV=1	0	99.904	100		sp|Q5U300|UBA1_RAT	Ubiquitin-like modifier-activating enzyme 1 OS=Rattus norvegicus OX=10116 GN=Uba1 PE=1 SV=1	0	65.034	97.8907
P_KWMTBOMO05205		tr|H9IYX7|H9IYX7_BOMMO	5-aminoimidazole-4-carboxamide ribonucleotide formyltransferase OS=Bombyx mori OX=7091 PE=3 SV=1	0	100	98.8156		sp|P31335|PUR9_CHICK	Bifunctional purine biosynthesis protein ATIC OS=Gallus gallus OX=9031 GN=ATIC PE=1 SV=1	0	68.855	100
P_KWMTBOMO05541		tr|C7AQP4|C7AQP4_BOMMO	Calcium-transporting ATPase OS=Bombyx mori OX=7091 PE=2 SV=1	0	99.301	100		sp|Q7PPA5|ATC1_ANOGA	Calcium-transporting ATPase sarcoplasmic/endoplasmic reticulum type OS=Anopheles gambiae OX=7165 GN=SERCA PE=3 SV=5	0	89.279	99.6008
P_KWMTBOMO05564		tr|Q2F6A6|Q2F6A6_BOMMO	Elongation factor Tu OS=Bombyx mori OX=7091 PE=2 SV=1	0	100	100		sp|P49411|EFTU_HUMAN	Elongation factor Tu, mitochondrial OS=Homo sapiens OX=9606 GN=TUFM PE=1 SV=2	0	65.672	86.4516
P_KWMTBOMO05566		tr|Q2F5M1|Q2F5M1_BOMMO	GTP-binding nuclear protein OS=Bombyx mori OX=7091 GN=692970 PE=2 SV=1	1.62e-162	100	100		sp|Q9VZ23|RAN_DROME	GTP-binding nuclear protein Ran OS=Drosophila melanogaster OX=7227 GN=Ran PE=1 SV=1	2.67e-147	91.429	98.5915
P_KWMTBOMO05612		tr|H9JB77|H9JB77_BOMMO	SAM_MT_RSMB_NOP domain-containing protein OS=Bombyx mori OX=7091 GN=101741314 PE=3 SV=1	0	99.874	100		sp|Q922K7|NOP2_MOUSE	Probable 28S rRNA (cytosine-C(5))-methyltransferase OS=Mus musculus OX=10090 GN=Nop2 PE=1 SV=1	0	53.565	72.6928
P_KWMTBOMO05741		tr|A1E129|A1E129_BOMMO	Kinesin-like protein OS=Bombyx mori OX=7091 PE=3 SV=2	0	99.17	100		sp|P17210|KINH_DROME	Kinesin heavy chain OS=Drosophila melanogaster OX=7227 GN=Khc PE=1 SV=2	0	74.871	100
P_KWMTBOMO05975		tr|H9J059|H9J059_BOMMO	Tr-type G domain-containing protein OS=Bombyx mori OX=7091 PE=4 SV=1	0	100	100		sp|Q5R8Q7|GTPB1_PONAB	GTP-binding protein 1 (Fragment) OS=Pongo abelii OX=9601 GN=GTPBP1 PE=2 SV=2	2.41e-105	74.641	75.7246
P_KWMTBOMO05979		tr|Q5UAT0|Q5UAT0_BOMMO	Ribosomal protein L10 OS=Bombyx mori OX=7091 GN=RpL10 PE=2 SV=1	7.89e-166	100	100		sp|O96647|RL10_BOMMA	60S ribosomal protein L10 OS=Bombyx mandarina OX=7092 GN=RpL10 PE=2 SV=1	2.91e-164	99.543	100
P_KWMTBOMO06229		tr|H9IX17|H9IX17_BOMMO	Ribos_L4_asso_C domain-containing protein OS=Bombyx mori OX=7091 GN=692659 PE=3 SV=1	0	100	100		sp|P09180|RL4_DROME	60S ribosomal protein L4 OS=Drosophila melanogaster OX=7227 GN=RpL4 PE=1 SV=2	0	68.407	88.2488
P_KWMTBOMO06480		sp|Q5UAS1|RL18_BOMMO	60S ribosomal protein L18 OS=Bombyx mori OX=7091 GN=RpL18 PE=2 SV=1	1.41e-132	100	100		sp|Q5UAS1|RL18_BOMMO	60S ribosomal protein L18 OS=Bombyx mori OX=7091 GN=RpL18 PE=2 SV=1	9.16e-132	100	100
P_KWMTBOMO06974		tr|Q5UAQ1|Q5UAQ1_BOMMO	Ribosomal protein L36A OS=Bombyx mori OX=7091 GN=RpL36A PE=2 SV=1	2.04e-71	100	100		sp|Q9NB33|RL44_OCHTR	60S ribosomal protein L44 OS=Ochlerotatus triseriatus OX=7162 GN=RpL44 PE=3 SV=3	5.04e-61	85.577	100
P_KWMTBOMO07374		tr|Q0ZAL3|Q0ZAL3_BOMMO	Splicing factor proline-and glutamine-rich OS=Bombyx mori OX=7091 GN=SFPQ PE=2 SV=1	0	99.802	100		sp|Q9GRW7|NONA_DROVI	Protein no-on-transient A OS=Drosophila virilis OX=7244 GN=nonA PE=2 SV=1	5.73e-114	61.132	52.4752
P_KWMTBOMO07589		tr|A0A023SG69|A0A023SG69_BOMMO	Coatomer subunit beta OS=Bombyx mori OX=7091 GN=beta-COP PE=4 SV=1	0	93.705	100		sp|Q5ZIA5|COPB_CHICK	Coatomer subunit beta OS=Gallus gallus OX=9031 GN=COPB1 PE=2 SV=1	0	57.39	100
P_KWMTBOMO07688		tr|Q5UAP3|Q5UAP3_BOMMO	40S ribosomal protein S2 OS=Bombyx mori OX=7091 GN=RpS2 PE=2 SV=1	0	100	100		sp|P31009|RS2_DROME	40S ribosomal protein S2 OS=Drosophila melanogaster OX=7227 GN=RpS2 PE=1 SV=2	4.18e-144	90.278	82.7586
P_KWMTBOMO07855		tr|Q2F6C2|Q2F6C2_BOMMO	CCT-beta OS=Bombyx mori OX=7091 GN=692797 PE=2 SV=1	0	100	100		sp|Q3ZBH0|TCPB_BOVIN	T-complex protein 1 subunit beta OS=Bos taurus OX=9913 GN=CCT2 PE=1 SV=3	0	72.15	99.8134
P_KWMTBOMO07930		tr|Q1HQ48|Q1HQ48_BOMMO	Mitochondrial single-stranded DNA-binding protein OS=Bombyx mori OX=7091 PE=2 SV=1	1.39e-108	99.324	100		sp|P54622|SSBP_DROME	Single-stranded DNA-binding protein, mitochondrial OS=Drosophila melanogaster OX=7227 GN=mtSSB PE=1 SV=2	2.56e-50	64.545	74.3243
P_KWMTBOMO08045		tr|H9IUV7|H9IUV7_BOMMO	Leucyl-tRNA synthetase OS=Bombyx mori OX=7091 PE=3 SV=1	0	99.658	99.2072		sp|Q9P2J5|SYLC_HUMAN	Leucine--tRNA ligase, cytoplasmic OS=Homo sapiens OX=9606 GN=LARS1 PE=1 SV=2	0	65.984	99.547
P_KWMTBOMO08100		tr|Q5UAR8|Q5UAR8_BOMMO	60S ribosomal protein L21 OS=Bombyx mori OX=7091 GN=RpL21 PE=2 SV=1	1.42e-115	100	100		sp|P46778|RL21_HUMAN	60S ribosomal protein L21 OS=Homo sapiens OX=9606 GN=RPL21 PE=1 SV=2	2.69e-77	66.875	100
P_KWMTBOMO08106		tr|H9IUY0|H9IUY0_BOMMO	Clathrin light chain OS=Bombyx mori OX=7091 PE=3 SV=1	2.92e-149	98.095	100		sp|Q9VWA1|CLC_DROME	Clathrin light chain OS=Drosophila melanogaster OX=7227 GN=Clc PE=2 SV=1	5.76e-40	46.948	100
P_KWMTBOMO08310		tr|Q1HQB9|Q1HQB9_BOMMO	Nucleosome assembly protein isoform 1 OS=Bombyx mori OX=7091 PE=2 SV=1	0	100	100		sp|Q5U2Z3|NP1L4_RAT	Nucleosome assembly protein 1-like 4 OS=Rattus norvegicus OX=10116 GN=Nap1l4 PE=1 SV=1	4.23e-97	49.462	94.1772
P_KWMTBOMO08343		tr|H9JI86|H9JI86_BOMMO	Uncharacterized protein OS=Bombyx mori OX=7091 PE=4 SV=1	0	100	71.519		sp|P54802|ANAG_HUMAN	Alpha-N-acetylglucosaminidase OS=Homo sapiens OX=9606 GN=NAGLU PE=1 SV=2	2.63e-165	41.81	67.616
P_KWMTBOMO08399		tr|Q5UAR0|Q5UAR0_BOMMO	60S ribosomal protein L28 OS=Bombyx mori OX=7091 GN=RpL28 PE=2 SV=1	1.61e-98	100	100		sp|Q962T2|RL28_SPOFR	60S ribosomal protein L28 OS=Spodoptera frugiperda OX=7108 GN=RpL28 PE=2 SV=1	7.15e-81	92.857	90.6475
P_KWMTBOMO08607		tr|H9JEL8|H9JEL8_BOMMO	Uncharacterized protein OS=Bombyx mori OX=7091 PE=4 SV=1	2.44e-142	98.974	54.3175		sp|Q5M9F1|RBM34_RAT	RNA-binding protein 34 OS=Rattus norvegicus OX=10116 GN=Rbm34 PE=1 SV=1	8.14e-07	26.087	64.0669
P_KWMTBOMO08642		tr|F8UN44|F8UN44_BOMMO	Heat shock protein 70-3 OS=Bombyx mori OX=7091 PE=2 SV=1	0	100	100		sp|P29844|BIP_DROME	Endoplasmic reticulum chaperone BiP OS=Drosophila melanogaster OX=7227 GN=Hsc70-3 PE=1 SV=2	0	89.708	99.3893
P_KWMTBOMO08648		tr|H9JEK1|H9JEK1_BOMMO	Uncharacterized protein OS=Bombyx mori OX=7091 PE=3 SV=1	0	91.125	100		sp|P13395|SPTCA_DROME	Spectrin alpha chain OS=Drosophila melanogaster OX=7227 GN=alpha-Spec PE=1 SV=2	0	76.124	100
P_KWMTBOMO08666		tr|Q66SV4|Q66SV4_BOMMO	40S ribosomal protein S23 OS=Bombyx mori OX=7091 GN=S23 PE=2 SV=1	5.48e-103	100	100		sp|Q6EV23|RS23_PAPDA	40S ribosomal protein S23 OS=Papilio dardanus OX=77259 GN=RpS23 PE=2 SV=1	6.27e-101	97.902	100
P_KWMTBOMO08776		sp|Q1HPW4|EIF3I_BOMMO	Eukaryotic translation initiation factor 3 subunit I OS=Bombyx mori OX=7091 PE=2 SV=1	0	100	100		sp|Q1HPW4|EIF3I_BOMMO	Eukaryotic translation initiation factor 3 subunit I OS=Bombyx mori OX=7091 PE=2 SV=1	0	100	100
P_KWMTBOMO08820		tr|Q1HPI5|Q1HPI5_BOMMO	Nucleoside diphosphate kinase OS=Bombyx mori OX=7091 PE=2 SV=1	4.74e-113	100	100		sp|P08879|NDKA_DROME	Nucleoside diphosphate kinase OS=Drosophila melanogaster OX=7227 GN=awd PE=1 SV=3	5.17e-94	81.046	100
P_KWMTBOMO08956		tr|H9JDY1|H9JDY1_BOMMO	M20_dimer domain-containing protein OS=Bombyx mori OX=7091 PE=3 SV=1	0	99.784	96.8685		sp|Q3ZC84|CNDP2_BOVIN	Cytosolic non-specific dipeptidase OS=Bos taurus OX=9913 GN=CNDP2 PE=2 SV=1	0	58.65	98.9562
P_KWMTBOMO09050		tr|H9JDA0|H9JDA0_BOMMO	Uncharacterized protein OS=Bombyx mori OX=7091 PE=4 SV=1	0	100	92.7966		sp|Q96RQ3|MCCA_HUMAN	Methylcrotonoyl-CoA carboxylase subunit alpha, mitochondrial OS=Homo sapiens OX=9606 GN=MCCC1 PE=1 SV=3	0	56.278	95.6215
P_KWMTBOMO09054		tr|Q1HQ47|Q1HQ47_BOMMO	Isocitrate dehydrogenase [NADP] OS=Bombyx mori OX=7091 GN=100101164 PE=2 SV=1	0	100	100		sp|P33198|IDHP_PIG	Isocitrate dehydrogenase [NADP], mitochondrial (Fragment) OS=Sus scrofa OX=9823 GN=IDH2 PE=1 SV=1	0	71.325	95.4023
P_KWMTBOMO09230		tr|H9J1M5|H9J1M5_BOMMO	Uncharacterized protein OS=Bombyx mori OX=7091 PE=3 SV=1	3.45e-75	100	100		sp|P08570|RLA1_DROME	60S acidic ribosomal protein P1 OS=Drosophila melanogaster OX=7227 GN=RpLP1 PE=1 SV=2	1.01e-42	81.25	100
P_KWMTBOMO09415		tr|H9JTB0|H9JTB0_BOMMO	RNA helicase OS=Bombyx mori OX=7091 GN=101741115 PE=4 SV=1	0	99.765	100		sp|Q27268|DX39B_DROME	ATP-dependent RNA helicase WM6 OS=Drosophila melanogaster OX=7227 GN=Hel25E PE=1 SV=1	0	88.498	100
P_KWMTBOMO09442		tr|Q5UAT5|Q5UAT5_BOMMO	60S ribosomal protein L6 OS=Bombyx mori OX=7091 GN=RpL6 PE=2 SV=1	0	99.634	100		sp|Q6QMZ4|RL6_CHILA	60S ribosomal protein L6 OS=Chinchilla lanigera OX=34839 GN=RPL6 PE=2 SV=3	4.24e-65	48.8	91.5751
P_KWMTBOMO09542		tr|H9JU13|H9JU13_BOMMO	Eukaryotic translation initiation factor 3 subunit A OS=Bombyx mori OX=7091 PE=3 SV=1	0	96.154	90.339		sp|Q173M7|EIF3A_AEDAE	Eukaryotic translation initiation factor 3 subunit A OS=Aedes aegypti OX=7159 GN=eIF3-S10 PE=3 SV=1	0	66.215	68.7288
P_KWMTBOMO09621		tr|H9JTI9|H9JTI9_BOMMO	Eukaryotic translation initiation factor 3 subunit C OS=Bombyx mori OX=7091 GN=eIF3c PE=3 SV=1	0	100	100		sp|Q0ZB76|EIF3C_BOMMO	Eukaryotic translation initiation factor 3 subunit C OS=Bombyx mori OX=7091 GN=eIF3-S8 PE=2 SV=1	0	99.886	100
P_KWMTBOMO09747		tr|B7XFU6|B7XFU6_BOMMO	Clathrin heavy chain OS=Bombyx mori OX=7091 GN=100233163 PE=2 SV=1	0	99.941	100		sp|P29742|CLH_DROME	Clathrin heavy chain OS=Drosophila melanogaster OX=7227 GN=Chc PE=1 SV=1	0	85.196	100
P_KWMTBOMO09808		tr|Q2F6C3|Q2F6C3_BOMMO	Chaperonin subunit 6a zeta OS=Bombyx mori OX=7091 GN=692796 PE=2 SV=1	0	100	100		sp|P80317|TCPZ_MOUSE	T-complex protein 1 subunit zeta OS=Mus musculus OX=10090 GN=Cct6a PE=1 SV=3	0	72.505	100
P_KWMTBOMO10056		tr|B5M9A0|B5M9A0_BOMMO	Myosin heavy chain (Fragment) OS=Bombyx mori OX=7091 PE=2 SV=1	0	55.179	26.9543		sp|Q99323|MYSN_DROME	Myosin heavy chain, non-muscle OS=Drosophila melanogaster OX=7227 GN=zip PE=1 SV=2	0	74.987	100
P_KWMTBOMO10248		tr|H9JCR4|H9JCR4_BOMMO	40S ribosomal protein SA OS=Bombyx mori OX=7091 PE=3 SV=1	0	100	100		sp|Q5UAP4|RSSA_BOMMO	40S ribosomal protein SA OS=Bombyx mori OX=7091 PE=2 SV=1	0	99.673	100
P_KWMTBOMO10283		tr|H9JCM2|H9JCM2_BOMMO	PCI domain-containing protein OS=Bombyx mori OX=7091 GN=692900 PE=3 SV=1	0	100	100		sp|Q9D8W5|PSD12_MOUSE	26S proteasome non-ATPase regulatory subunit 12 OS=Mus musculus OX=10090 GN=Psmd12 PE=1 SV=4	0	59.071	100
P_KWMTBOMO10358		tr|H9JX26|H9JX26_BOMMO	DUF4781 domain-containing protein OS=Bombyx mori OX=7091 PE=4 SV=1	0	79.827	48.3287		--	--	--	--	--
P_KWMTBOMO10780		tr|H9JFX9|H9JFX9_BOMMO	Uncharacterized protein OS=Bombyx mori OX=7091 PE=4 SV=1	0	90.138	43.8191		sp|Q9V3P6|PSMD1_DROME	26S proteasome non-ATPase regulatory subunit 1 OS=Drosophila melanogaster OX=7227 GN=Rpn2 PE=1 SV=1	0	71.218	100
P_KWMTBOMO11061		tr|Q2F5N1|Q2F5N1_BOMMO	Prohibitin OS=Bombyx mori OX=7091 GN=693108 PE=2 SV=1	0	100	100		sp|Q5XIH7|PHB2_RAT	Prohibitin-2 OS=Rattus norvegicus OX=10116 GN=Phb2 PE=1 SV=1	5.66e-158	72.667	100
P_KWMTBOMO11083		tr|Q9BPS3|Q9BPS3_BOMMO	Elongation factor 1 gamma OS=Bombyx mori OX=7091 GN=ef-1g PE=2 SV=1	0	100	100		sp|P12261|EF1G_ARTSA	Elongation factor 1-gamma OS=Artemia salina OX=85549 PE=1 SV=3	0	65.741	100
P_KWMTBOMO11096		tr|A1E9B3|A1E9B3_BOMMO	H(+)-transporting two-sector ATPase OS=Bombyx mori OX=7091 PE=2 SV=1	0	99.676	100		sp|P31400|VATA_MANSE	V-type proton ATPase catalytic subunit A OS=Manduca sexta OX=7130 GN=VHAA PE=2 SV=1	0	98.217	100
P_KWMTBOMO11255		tr|Q5UAN5|Q5UAN5_BOMMO	40S ribosomal protein S9 OS=Bombyx mori OX=7091 GN=RpS9 PE=2 SV=1	5.62e-140	100	100		sp|B4PEU8|RS9_DROYA	40S ribosomal protein S9 OS=Drosophila yakuba OX=7245 GN=RpS9 PE=2 SV=1	2.83e-117	89.231	100
P_KWMTBOMO11336		tr|H9IX66|H9IX66_BOMMO	Threonyl-tRNA synthetase OS=Bombyx mori OX=7091 PE=3 SV=1	0	98.151	98.5975		sp|Q3ZBV8|SYTC_BOVIN	Threonine--tRNA ligase 1, cytoplasmic OS=Bos taurus OX=9913 GN=TARS1 PE=2 SV=1	0	69.371	100
P_KWMTBOMO11448		tr|H9IXE5|H9IXE5_BOMMO	Uncharacterized protein OS=Bombyx mori OX=7091 GN=733057 PE=4 SV=1	1.36e-160	100	100		sp|P53994|RAB2A_MOUSE	Ras-related protein Rab-2A OS=Mus musculus OX=10090 GN=Rab2a PE=1 SV=1	2.2e-141	90.654	100
P_KWMTBOMO11985		tr|Q5UAT4|Q5UAT4_BOMMO	Ribosomal protein L7 OS=Bombyx mori OX=7091 GN=RpL7 PE=2 SV=1	0	100	100		sp|P32100|RL7_DROME	60S ribosomal protein L7 OS=Drosophila melanogaster OX=7227 GN=RpL7 PE=1 SV=2	4.63e-117	66.667	92.5651
P_KWMTBOMO12166		tr|H9JWZ4|H9JWZ4_BOMMO	NADH dehydrogenase [ubiquinone] 1 alpha subcomplex subunit 10, mitochondrial OS=Bombyx mori OX=7091 GN=101745480 PE=3 SV=1	0	100	100		sp|P91929|NDUAA_DROME	NADH dehydrogenase [ubiquinone] 1 alpha subcomplex subunit 10, mitochondrial OS=Drosophila melanogaster OX=7227 GN=ND-42 PE=1 SV=2	1.8e-134	49.485	97.4874
P_KWMTBOMO12287		tr|Q5UAM2|Q5UAM2_BOMMO	40S ribosomal protein S20 OS=Bombyx mori OX=7091 GN=RpS20 PE=2 SV=1	3.74e-87	100	100		sp|P55828|RS20_DROME	40S ribosomal protein S20 OS=Drosophila melanogaster OX=7227 GN=RpS20 PE=1 SV=1	1.92e-68	83.74	100
P_KWMTBOMO12389		tr|H9JSC6|H9JSC6_BOMMO	Coatomer subunit epsilon OS=Bombyx mori OX=7091 PE=3 SV=1	0	100	100		sp|Q5ZIK9|COPE_CHICK	Coatomer subunit epsilon OS=Gallus gallus OX=9031 GN=COPE PE=2 SV=1	6.42e-96	48.475	97.6821
P_KWMTBOMO12560		tr|A0A1Q1NKL1|A0A1Q1NKL1_BOMMO	Tyrosine--tRNA ligase OS=Bombyx mori OX=7091 PE=2 SV=1	0	99.809	100		sp|Q5ZJ08|SYYC_CHICK	Tyrosine--tRNA ligase, cytoplasmic OS=Gallus gallus OX=9031 GN=YARS1 PE=2 SV=1	0	71.374	100
P_KWMTBOMO12659		tr|H9IVX5|H9IVX5_BOMMO	T-complex protein 1 subunit gamma OS=Bombyx mori OX=7091 GN=101744569 PE=3 SV=1	0	100	100		sp|P48605|TCPG_DROME	T-complex protein 1 subunit gamma OS=Drosophila melanogaster OX=7227 GN=CCT3 PE=2 SV=2	0	81.041	99.6296
P_KWMTBOMO12667		tr|Q1HPM7|Q1HPM7_BOMMO	Mitochondrial aldehyde dehydrogenase OS=Bombyx mori OX=7091 PE=2 SV=1	0	97.291	47.2281		sp|P81178|ALDH2_MESAU	Aldehyde dehydrogenase, mitochondrial OS=Mesocricetus auratus OX=10036 GN=ALDH2 PE=1 SV=1	0	70	45.8422
P_KWMTBOMO12844		tr|H9U396|H9U396_BOMMO	Endoplasmin-like protein OS=Bombyx mori OX=7091 PE=2 SV=1	0	100	100		sp|Q66HD0|ENPL_RAT	Endoplasmin OS=Rattus norvegicus OX=10116 GN=Hsp90b1 PE=1 SV=2	0	59.264	93.9506
P_KWMTBOMO12895		tr|Q19AA9|Q19AA9_BOMMO	Transport protein Sec61 alpha subunit OS=Bombyx mori OX=7091 GN=733068 PE=2 SV=1	0	100	100		sp|Q9JLR1|S61A2_MOUSE	Protein transport protein Sec61 subunit alpha isoform 2 OS=Mus musculus OX=10090 GN=Sec61a2 PE=2 SV=3	0	91.597	100
P_KWMTBOMO13226		tr|H6VTQ9|H6VTQ9_BOMMO	DnaJ-19 OS=Bombyx mori OX=7091 PE=2 SV=1	0	100	99.2978		sp|Q9UGP8|SEC63_HUMAN	Translocation protein SEC63 homolog OS=Homo sapiens OX=9606 GN=SEC63 PE=1 SV=2	0	44.537	100
P_KWMTBOMO13293		tr|E9JEI6|E9JEI6_BOMMO	Poly [ADP-ribose] polymerase (Fragment) OS=Bombyx mori OX=7091 PE=2 SV=1	0	99.894	94.5		sp|Q11208|PARP_SARPE	Poly [ADP-ribose] polymerase OS=Sarcophaga peregrina OX=7386 PE=1 SV=1	0	48.473	100
P_KWMTBOMO13405		tr|H9JN03|H9JN03_BOMMO	Proliferating cell nuclear antigen OS=Bombyx mori OX=7091 GN=692356 PE=3 SV=1	0	100	100		sp|O01377|PCNA_BOMMO	Proliferating cell nuclear antigen OS=Bombyx mori OX=7091 GN=PCNA PE=2 SV=1	0	98.846	100
P_KWMTBOMO13455		sp|Q5UAP0|RS4_BOMMO	40S ribosomal protein S4 OS=Bombyx mori OX=7091 GN=RpS4 PE=2 SV=1	0	100	100		sp|Q5UAP0|RS4_BOMMO	40S ribosomal protein S4 OS=Bombyx mori OX=7091 GN=RpS4 PE=2 SV=1	0	100	100
P_KWMTBOMO13569		tr|Q5UAR3|Q5UAR3_BOMMO	Ribosomal protein L26 OS=Bombyx mori OX=7091 GN=RpL26 PE=2 SV=1	7.52e-72	100	100		sp|Q95WA0|RL26_LITLI	60S ribosomal protein L26 OS=Littorina littorea OX=31216 GN=RPL26 PE=2 SV=1	1.9e-51	80.392	100
P_KWMTBOMO13859		tr|H9JPJ1|H9JPJ1_BOMMO	40S ribosomal protein S30 OS=Bombyx mori OX=7091 PE=3 SV=1	5.15e-93	100	100		sp|Q9W6Y0|RS30_ORYLA	40S ribosomal protein S30 OS=Oryzias latipes OX=8090 GN=fau PE=3 SV=2	1.58e-23	72.881	45.3846
P_KWMTBOMO13960		tr|Q5UAN0|Q5UAN0_BOMMO	40S ribosomal protein S13 OS=Bombyx mori OX=7091 GN=RpS13 PE=2 SV=1	8.93e-110	100	100		sp|Q962R6|RS13_SPOFR	40S ribosomal protein S13 OS=Spodoptera frugiperda OX=7108 GN=RpS13 PE=2 SV=3	1.63e-108	99.338	100
P_KWMTBOMO14440		tr|Q1HPP5|Q1HPP5_BOMMO	Actin-depolymerizing factor 1 OS=Bombyx mori OX=7091 PE=2 SV=1	1.7e-108	100	100		sp|P45594|CADF_DROME	Cofilin/actin-depolymerizing factor homolog OS=Drosophila melanogaster OX=7227 GN=tsr PE=1 SV=1	2.22e-100	92.568	100
P_KWMTBOMO14479		tr|H9IS48|H9IS48_BOMMO	Uncharacterized protein OS=Bombyx mori OX=7091 GN=101742289 PE=3 SV=1	7.91e-100	100	100		sp|Q8I1F4|FBRL_DROER	rRNA 2'-O-methyltransferase fibrillarin OS=Drosophila erecta OX=7220 GN=Fib PE=3 SV=1	2.11e-41	82.278	50
P_KWMTBOMO14549		tr|I6XKQ0|I6XKQ0_BOMMO	Heat shock protein 70-5 OS=Bombyx mori OX=7091 PE=2 SV=1	0	99.565	100		sp|P29845|HSP7E_DROME	Heat shock 70 kDa protein cognate 5 OS=Drosophila melanogaster OX=7227 GN=Hsc70-5 PE=1 SV=2	0	81.86	93.4783
P_KWMTBOMO14732		tr|Q86PG2|Q86PG2_BOMMO	ADP/ATP translocase OS=Bombyx mori OX=7091 GN=ANT PE=2 SV=1	0	100	100		sp|Q26365|ADT_DROME	ADP,ATP carrier protein OS=Drosophila melanogaster OX=7227 GN=sesB PE=2 SV=4	0	87.458	98.3333
P_KWMTBOMO14804		tr|H9JRQ1|H9JRQ1_BOMMO	Programmed cell death protein 4 OS=Bombyx mori OX=7091 GN=101743674 PE=3 SV=1	0	100	59.1422		sp|Q98TX3|PDCD4_CHICK	Programmed cell death protein 4 OS=Gallus gallus OX=9031 GN=PDCD4 PE=2 SV=1	3.96e-92	43.371	100
P_KWMTBOMO14936		tr|H9IU37|H9IU37_BOMMO	GB1/RHD3-type G domain-containing protein OS=Bombyx mori OX=7091 PE=3 SV=1	0	97.695	100		sp|Q9VC57|ATLAS_DROME	Atlastin OS=Drosophila melanogaster OX=7227 GN=atl PE=1 SV=1	0	68.275	97.8221
P_KWMTBOMO14984		tr|H9J5J2|H9J5J2_BOMMO	AAA domain-containing protein OS=Bombyx mori OX=7091 PE=3 SV=1	0	100	100		sp|O42587|PR6AA_XENLA	26S proteasome regulatory subunit 6A-A OS=Xenopus laevis OX=8355 GN=psmc3-a PE=2 SV=2	0	88.124	98.3645
P_KWMTBOMO15114		tr|Q5UAL8|Q5UAL8_BOMMO	40S ribosomal protein S25 OS=Bombyx mori OX=7091 GN=RpS25 PE=2 SV=1	7.13e-83	100	100		sp|Q962Q5|RS25_SPOFR	40S ribosomal protein S25 OS=Spodoptera frugiperda OX=7108 GN=RpS25 PE=3 SV=1	1.98e-81	99.16	100
P_KWMTBOMO15123		tr|H9J5W8|H9J5W8_BOMMO	AAA domain-containing protein OS=Bombyx mori OX=7091 PE=3 SV=2	0	99.241	90.389		sp|P48601|PRS4_DROME	26S proteasome regulatory subunit 4 OS=Drosophila melanogaster OX=7227 GN=Rpt2 PE=1 SV=2	0	96.811	100
P_KWMTBOMO15159		tr|H9J5Z1|H9J5Z1_BOMMO	Uncharacterized protein OS=Bombyx mori OX=7091 PE=4 SV=1	0	97.685	99.3428		sp|Q99PL5|RRBP1_MOUSE	Ribosome-binding protein 1 OS=Mus musculus OX=10090 GN=Rrbp1 PE=1 SV=2	3.36e-17	27.524	67.2508
P_KWMTBOMO15359		tr|H9J6H4|H9J6H4_BOMMO	Glutamyl-tRNA synthetase OS=Bombyx mori OX=7091 PE=3 SV=1	0	100	97.0994		sp|P28668|SYEP_DROME	Bifunctional glutamate/proline--tRNA ligase OS=Drosophila melanogaster OX=7227 GN=GluProRS PE=1 SV=2	0	60.526	99.7238
P_KWMTBOMO15584		tr|D2Y4R2|D2Y4R2_BOMMO	Coatomer subunit alpha OS=Bombyx mori OX=7091 GN=COPA PE=2 SV=1	0	99.729	99.7297		sp|P53621|COPA_HUMAN	Coatomer subunit alpha OS=Homo sapiens OX=9606 GN=COPA PE=1 SV=2	0	78.729	97.8378
P_KWMTBOMO15758		tr|B3VBE3|B3VBE3_BOMMO	Vacuolar proton pump subunit B OS=Bombyx mori OX=7091 PE=2 SV=1	0	99.278	88.2166		sp|P31401|VATB_MANSE	V-type proton ATPase subunit B OS=Manduca sexta OX=7130 GN=VHA55 PE=2 SV=1	0	97.112	88.2166
P_KWMTBOMO16309		tr|H9JW60|H9JW60_BOMMO	UBX domain-containing protein OS=Bombyx mori OX=7091 PE=4 SV=1	1.01e-106	92.353	43.5897		sp|Q3SZC4|NSF1C_BOVIN	NSFL1 cofactor p47 OS=Bos taurus OX=9913 GN=NSFL1C PE=2 SV=1	6.48e-85	40.852	100
P_KWMTBOMO16357		tr|Q5UAN3|Q5UAN3_BOMMO	40S ribosomal protein S11 OS=Bombyx mori OX=7091 GN=RpS11-1 PE=2 SV=1	6e-114	100	100		sp|P62280|RS11_HUMAN	40S ribosomal protein S11 OS=Homo sapiens OX=9606 GN=RPS11 PE=1 SV=3	4.63e-88	77.848	100
P_KWMTBOMO16637		tr|Q9GSB6|Q9GSB6_BOMMO	Heat shock protein hsp20.4 OS=Bombyx mori OX=7091 GN=Hsp20.4 PE=2 SV=2	5.98e-133	100	100		sp|P82147|L2EFL_DROME	Protein lethal(2)essential for life OS=Drosophila melanogaster OX=7227 GN=l(2)efl PE=1 SV=1	8.44e-55	50.568	97.2376

## Sheet: common PIPs of fibL
Name	Bombyx-mori	Subject ID	Description	e-value	identity(%)	coverage(%)	Metazoa	Subject ID	Description	e-value	identity(%)	coverage(%)
P_KWMTBOMO00303		tr|H9ITG0|H9ITG0_BOMMO	Rab-GAP TBC domain-containing protein OS=Bombyx mori OX=7091 PE=4 SV=1	0	98.655	99.8779		sp|Q9VYY9|EVI5_DROME	Ecotropic viral integration site 5 ortholog OS=Drosophila melanogaster OX=7227 GN=Evi5 PE=1 SV=3	0	59.115	93.7729
P_KWMTBOMO00366		tr|H9ITD6|H9ITD6_BOMMO	Uncharacterized protein OS=Bombyx mori OX=7091 PE=4 SV=1	0	99.775	83.8041		sp|O42254|IF2B1_CHICK	Insulin-like growth factor 2 mRNA-binding protein 1 OS=Gallus gallus OX=9031 GN=IGF2BP1 PE=1 SV=1	7.53e-128	44.578	93.7853
P_KWMTBOMO00427		tr|Q9NKX3|Q9NKX3_BOMMO	Coatomer subunit gamma OS=Bombyx mori OX=7091 GN=copg1 PE=2 SV=1	0	99.884	100		sp|Q8I0G5|COPG_DROME	Coatomer subunit gamma OS=Drosophila melanogaster OX=7227 GN=gammaCOP PE=2 SV=1	0	57.555	100
P_KWMTBOMO00462		tr|D9N4J4|D9N4J4_BOMMO	Staphylococcal nuclease domain-containing protein OS=Bombyx mori OX=7091 GN=Tudor-SN PE=2 SV=1	0	99.887	100		sp|Q9W0S7|SND1_DROME	Staphylococcal nuclease domain-containing protein 1 OS=Drosophila melanogaster OX=7227 GN=Tudor-SN PE=1 SV=1	0	52.412	100
P_KWMTBOMO00786		tr|H9JJK3|H9JJK3_BOMMO	HIT domain-containing protein OS=Bombyx mori OX=7091 GN=693069 PE=4 SV=1	6.16e-93	100	100		sp|P62958|HINT1_BOVIN	Histidine triad nucleotide-binding protein 1 OS=Bos taurus OX=9913 GN=HINT1 PE=1 SV=2	1.81e-62	68.75	100
P_KWMTBOMO00793		tr|H9JJJ8|H9JJJ8_BOMMO	Uncharacterized protein OS=Bombyx mori OX=7091 GN=101743807 PE=3 SV=1	0	100	100		sp|Q68FQ0|TCPE_RAT	T-complex protein 1 subunit epsilon OS=Rattus norvegicus OX=10116 GN=Cct5 PE=1 SV=1	0	70.391	99.0775
P_KWMTBOMO00794		tr|Q1HQ81|Q1HQ81_BOMMO	Nascent polypeptide associated complex protein alpha subunit OS=Bombyx mori OX=7091 PE=2 SV=1	1.91e-153	100	100		sp|Q94518|NACA_DROME	Nascent polypeptide-associated complex subunit alpha OS=Drosophila melanogaster OX=7227 GN=Nacalpha PE=1 SV=2	1.16e-78	65.455	100
P_KWMTBOMO00838		tr|Q5UAR6|Q5UAR6_BOMMO	60S ribosomal protein L23 OS=Bombyx mori OX=7091 GN=RpL23 PE=2 SV=1	5.38e-99	100	100		sp|P48159|RL23_DROME	60S ribosomal protein L23 OS=Drosophila melanogaster OX=7227 GN=RpL23 PE=1 SV=2	5.37e-94	95	100
P_KWMTBOMO00860		tr|D2Y4R7|D2Y4R7_BOMMO	Coatomer subunit zeta OS=Bombyx mori OX=7091 GN=COPZ PE=2 SV=1	1.18e-132	100	100		sp|P35604|COPZ1_BOVIN	Coatomer subunit zeta-1 OS=Bos taurus OX=9913 GN=COPZ1 PE=1 SV=2	2.88e-83	62.921	100
P_KWMTBOMO00927		tr|H9JJU3|H9JJU3_BOMMO	Aspartate--tRNA ligase, cytoplasmic OS=Bombyx mori OX=7091 PE=3 SV=1	0	100	71.2204		sp|Q3SYZ4|SYDC_BOVIN	Aspartate--tRNA ligase, cytoplasmic OS=Bos taurus OX=9913 GN=DARS1 PE=2 SV=1	0	64.329	90.8925
P_KWMTBOMO01055		tr|Q5UAL7|Q5UAL7_BOMMO	40S ribosomal protein S26 OS=Bombyx mori OX=7091 GN=RpS26 PE=2 SV=1	1.02e-81	100	87.1212		sp|Q9GT45|RS26_ANOGA	40S ribosomal protein S26 OS=Anopheles gambiae OX=7165 GN=RpS26 PE=3 SV=2	5.07e-67	84.348	87.1212
P_KWMTBOMO01068		tr|H9JD15|H9JD15_BOMMO	60S ribosomal protein L34 OS=Bombyx mori OX=7091 PE=3 SV=1	1.19e-81	100	100		sp|P45842|RL34_AEDAL	60S ribosomal protein L34 OS=Aedes albopictus OX=7160 GN=RpL34 PE=2 SV=2	1.72e-56	74.074	90.7563
P_KWMTBOMO01072		tr|H9JD17|H9JD17_BOMMO	Uncharacterized protein OS=Bombyx mori OX=7091 PE=4 SV=1	0	99.688	40.0249		sp|Q9W3N6|USO1_DROME	General vesicular transport factor p115 OS=Drosophila melanogaster OX=7227 GN=p115 PE=1 SV=2	0	50.619	100
P_KWMTBOMO01075		tr|H9JCV2|H9JCV2_BOMMO	Uncharacterized protein OS=Bombyx mori OX=7091 GN=101741707 PE=3 SV=1	0	99.629	100		sp|O02649|CH60A_DROME	Heat shock protein 60A OS=Drosophila melanogaster OX=7227 GN=Hsp60A PE=1 SV=3	0	84.72	95.9184
P_KWMTBOMO01114		tr|H9JCT5|H9JCT5_BOMMO	26S proteasome regulatory subunit 7 OS=Bombyx mori OX=7091 GN=101744256 PE=3 SV=1	0	100	100		sp|P35998|PRS7_HUMAN	26S proteasome regulatory subunit 7 OS=Homo sapiens OX=9606 GN=PSMC2 PE=1 SV=3	0	91.014	100
P_KWMTBOMO01148		tr|Q2F5M4|Q2F5M4_BOMMO	Receptor for activated protein kinase C RACK isoform 1 OS=Bombyx mori OX=7091 PE=2 SV=1	0	100	100		sp|O18640|GBLP_DROME	Guanine nucleotide-binding protein subunit beta-like protein OS=Drosophila melanogaster OX=7227 GN=Rack1 PE=1 SV=2	0	86.52	100
P_KWMTBOMO01273		tr|Q5UAS5|Q5UAS5_BOMMO	60S ribosomal protein L13a OS=Bombyx mori OX=7091 GN=RpL13A PE=2 SV=1	3.08e-151	100	100		sp|Q8MUR4|RL13A_CHOPR	60S ribosomal protein L13a OS=Choristoneura parallela OX=106495 GN=RpL13A PE=2 SV=1	3.13e-140	91.667	100
P_KWMTBOMO01312		tr|Q2F5N7|Q2F5N7_BOMMO	26S proteasome regulatory subunit RPN11 OS=Bombyx mori OX=7091 PE=2 SV=1	0	100	100		sp|Q9V3H2|PSDE_DROME	26S proteasome non-ATPase regulatory subunit 14 OS=Drosophila melanogaster OX=7227 GN=Rpn11 PE=1 SV=1	0	92.926	100
P_KWMTBOMO01315		tr|Q1HPJ9|Q1HPJ9_BOMMO	V-type proton ATPase subunit H OS=Bombyx mori OX=7091 PE=2 SV=1	0	99.789	100		sp|Q9U5N0|VATH_MANSE	V-type proton ATPase subunit H OS=Manduca sexta OX=7130 PE=2 SV=1	0	96.421	100
P_KWMTBOMO01424		tr|H9JHC4|H9JHC4_BOMMO	Elongation factor 1-beta' OS=Bombyx mori OX=7091 PE=3 SV=1	5.51e-165	100	100		sp|P29522|EF1B2_BOMMO	Elongation factor 1-beta' OS=Bombyx mori OX=7091 PE=1 SV=2	3.22e-163	99.55	100
P_KWMTBOMO01606		tr|H9J993|H9J993_BOMMO	Nop domain-containing protein OS=Bombyx mori OX=7091 GN=101742458 PE=3 SV=1	0	99.436	100		sp|Q9Y2X3|NOP58_HUMAN	Nucleolar protein 58 OS=Homo sapiens OX=9606 GN=NOP58 PE=1 SV=1	0	63.377	86.2004
P_KWMTBOMO01720		tr|H9J930|H9J930_BOMMO	Uncharacterized protein OS=Bombyx mori OX=7091 PE=4 SV=1	0	98.191	100		sp|Q26457|LA_AEDAL	La protein homolog OS=Aedes albopictus OX=7160 PE=1 SV=1	2.92e-91	44.225	93.4211
P_KWMTBOMO01790		tr|H9J907|H9J907_BOMMO	TPR_REGION domain-containing protein OS=Bombyx mori OX=7091 PE=4 SV=1	0	99.758	78.0511		sp|Q9VGU5|TTC14_DROME	Tetratricopeptide repeat protein 14 homolog OS=Drosophila melanogaster OX=7227 GN=CG6621 PE=1 SV=2	1.2e-82	48.657	31.6935
P_KWMTBOMO01796		tr|Q2F5J2|Q2F5J2_BOMMO	Prohibitin OS=Bombyx mori OX=7091 GN=692987 PE=2 SV=1	0	100	100		sp|P24156|L2CC_DROME	Protein l(2)37Cc OS=Drosophila melanogaster OX=7227 GN=l(2)37Cc PE=2 SV=2	6.28e-169	83.088	99.2701
P_KWMTBOMO01817		tr|H9IVQ5|H9IVQ5_BOMMO	RNA helicase OS=Bombyx mori OX=7091 PE=3 SV=1	0	100	50.332		sp|Q501J6|DDX17_MOUSE	Probable ATP-dependent RNA helicase DDX17 OS=Mus musculus OX=10090 GN=Ddx17 PE=1 SV=1	0	61.331	73.838
P_KWMTBOMO02081		tr|Q1HPW2|Q1HPW2_BOMMO	RNA helicase OS=Bombyx mori OX=7091 GN=692781 PE=2 SV=1	0	100	100		sp|Q02748|IF4A_DROME	Eukaryotic initiation factor 4A OS=Drosophila melanogaster OX=7227 GN=eIF4A PE=1 SV=3	0	79.949	93.8095
P_KWMTBOMO02185		tr|Q2F5X2|Q2F5X2_BOMMO	Proteasome subunit alpha type OS=Bombyx mori OX=7091 GN=692896 PE=2 SV=1	0	100	100		sp|P22769|PSA71_DROME	Proteasome subunit alpha type-7-1 OS=Drosophila melanogaster OX=7227 GN=Prosalpha4 PE=1 SV=2	2.5e-145	81.818	92.7711
P_KWMTBOMO02432		tr|H9JVD5|H9JVD5_BOMMO	Dolichyl-diphosphooligosaccharide--protein glycosyltransferase subunit 2 OS=Bombyx mori OX=7091 PE=3 SV=1	0	100	100		sp|Q3SZI6|RPN2_BOVIN	Dolichyl-diphosphooligosaccharide--protein glycosyltransferase subunit 2 OS=Bos taurus OX=9913 GN=RPN2 PE=2 SV=1	1.44e-58	28.155	99.3569
P_KWMTBOMO02460		tr|H9IZ80|H9IZ80_BOMMO	Uncharacterized protein OS=Bombyx mori OX=7091 GN=101746215 PE=4 SV=1	0	100	100		--	--	--	--	--
P_KWMTBOMO02470		tr|H9IZ85|H9IZ85_BOMMO	Dolichyl-diphosphooligosaccharide--protein glycosyltransferase subunit 1 OS=Bombyx mori OX=7091 PE=3 SV=1	0	100	98.9316		sp|E2RQ08|RPN1_CANLF	Dolichyl-diphosphooligosaccharide--protein glycosyltransferase subunit 1 OS=Canis lupus familiaris OX=9615 GN=RPN1 PE=1 SV=1	6.16e-166	53.811	92.5214
P_KWMTBOMO02477		tr|Q5UAR9|Q5UAR9_BOMMO	Ribosomal protein L19 OS=Bombyx mori OX=7091 GN=RpL19 PE=2 SV=1	1.82e-145	100	100		sp|P36241|RL19_DROME	60S ribosomal protein L19 OS=Drosophila melanogaster OX=7227 GN=RpL19 PE=1 SV=2	4.16e-113	84.343	99
P_KWMTBOMO02500		tr|H9IZ97|H9IZ97_BOMMO	Uncharacterized protein OS=Bombyx mori OX=7091 PE=4 SV=1	0	90.773	100		sp|O75439|MPPB_HUMAN	Mitochondrial-processing peptidase subunit beta OS=Homo sapiens OX=9606 GN=PMPCB PE=1 SV=2	0	68	96.5665
P_KWMTBOMO02734		tr|Q9BPS1|Q9BPS1_BOMMO	Elongation factor 1 delta OS=Bombyx mori OX=7091 GN=ef-1d PE=2 SV=1	9.74e-145	100	100		sp|P32192|EF1D_ARTSA	Elongation factor 1-delta OS=Artemia salina OX=85549 PE=1 SV=2	5.9e-72	62.632	93.1373
P_KWMTBOMO02775		tr|H9J1V6|H9J1V6_BOMMO	Very-long-chain enoyl-CoA reductase OS=Bombyx mori OX=7091 GN=101742899 PE=3 SV=1	0	100	100		sp|Q9N5Y2|TECR_CAEEL	Probable very-long-chain enoyl-CoA reductase art-1 OS=Caenorhabditis elegans OX=6239 GN=art-1 PE=3 SV=1	6.15e-119	56.209	100
P_KWMTBOMO02835		tr|H9J2D4|H9J2D4_BOMMO	RPN13_C domain-containing protein OS=Bombyx mori OX=7091 PE=3 SV=1	0	97.136	100		sp|Q6NZ09|ADRM1_DANRE	Proteasomal ubiquitin receptor ADRM1 OS=Danio rerio OX=7955 GN=adrm1b PE=1 SV=1	1.84e-92	45.524	96.0688
P_KWMTBOMO02994		tr|H9J281|H9J281_BOMMO	DNA photolyase OS=Bombyx mori OX=7091 PE=3 SV=1	0	100	96.0452		sp|Q28811|PHR_POTTR	Deoxyribodipyrimidine photo-lyase OS=Potorous tridactylus OX=9310 GN=PHR PE=2 SV=1	0	59.205	90.0188
P_KWMTBOMO03067		tr|H9J8B0|H9J8B0_BOMMO	Tripeptidyl-peptidase 2 OS=Bombyx mori OX=7091 GN=101742969 PE=4 SV=1	0	100	100		sp|P29144|TPP2_HUMAN	Tripeptidyl-peptidase 2 OS=Homo sapiens OX=9606 GN=TPP2 PE=1 SV=4	0	41.24	100
P_KWMTBOMO03113		tr|Q2F5V9|Q2F5V9_BOMMO	Translocon-associated protein subunit beta OS=Bombyx mori OX=7091 PE=2 SV=1	1.01e-139	100	100		sp|P43308|SSRB_HUMAN	Translocon-associated protein subunit beta OS=Homo sapiens OX=9606 GN=SSR2 PE=1 SV=1	2.35e-60	52.809	93.6842
P_KWMTBOMO03177		tr|H9JV99|H9JV99_BOMMO	BRO1 domain-containing protein OS=Bombyx mori OX=7091 PE=4 SV=1	0	97.718	100		sp|Q9QZA2|PDC6I_RAT	Programmed cell death 6-interacting protein OS=Rattus norvegicus OX=10116 GN=Pdcd6ip PE=1 SV=2	0	43.273	98.3629
P_KWMTBOMO03430		tr|Q2F5R4|Q2F5R4_BOMMO	Glutamate dehydrogenase (NAD(P)(+)) OS=Bombyx mori OX=7091 GN=692939 PE=2 SV=1	0	100	74.3869		sp|P54385|DHE3_DROME	Glutamate dehydrogenase, mitochondrial OS=Drosophila melanogaster OX=7227 GN=Gdh PE=1 SV=2	0	79.821	76.2943
P_KWMTBOMO03626		tr|H9J9S0|H9J9S0_BOMMO	CCT-alpha OS=Bombyx mori OX=7091 GN=101742382 PE=3 SV=1	0	100	100		sp|P12613|TCPA_DROME	T-complex protein 1 subunit alpha OS=Drosophila melanogaster OX=7227 GN=CCT1 PE=2 SV=2	0	80.576	100
P_KWMTBOMO03722		tr|H9JKE1|H9JKE1_BOMMO	Dynamin-type G domain-containing protein OS=Bombyx mori OX=7091 PE=4 SV=1	0	100	76.6917		sp|Q9H4M9|EHD1_HUMAN	EH domain-containing protein 1 OS=Homo sapiens OX=9606 GN=EHD1 PE=1 SV=2	0	69.101	100
P_KWMTBOMO03860		tr|H9JKX7|H9JKX7_BOMMO	Uncharacterized protein OS=Bombyx mori OX=7091 PE=3 SV=1	0	97.603	100		sp|P26686|SRR55_DROME	Serine-arginine protein 55 OS=Drosophila melanogaster OX=7227 GN=B52 PE=1 SV=4	6.44e-97	77.487	66.7832
P_KWMTBOMO03951		tr|Q5UAL6|Q5UAL6_BOMMO	40S ribosomal protein S27 OS=Bombyx mori OX=7091 GN=RpS27 PE=2 SV=1	1.35e-59	100	100		sp|P55833|RS27_HOMAM	40S ribosomal protein S27 OS=Homarus americanus OX=6706 GN=RPS27 PE=3 SV=2	1.42e-47	78.571	100
P_KWMTBOMO03986		tr|Q9NL60|Q9NL60_BOMMO	Annexin OS=Bombyx mori OX=7091 PE=2 SV=1	0	99.69	100		sp|P22464|ANXB9_DROME	Annexin B9 OS=Drosophila melanogaster OX=7227 GN=AnxB9 PE=2 SV=2	9.67e-180	76.012	99.3808
P_KWMTBOMO04168		tr|H9JGM3|H9JGM3_BOMMO	Uncharacterized protein OS=Bombyx mori OX=7091 PE=3 SV=1	0	100	100		sp|Q94516|AT5F1_DROME	ATP synthase subunit b, mitochondrial OS=Drosophila melanogaster OX=7227 GN=ATPsynB PE=2 SV=2	1.44e-101	69.036	81.07
P_KWMTBOMO04370		tr|H9J6V7|H9J6V7_BOMMO	OBG-type G domain-containing protein OS=Bombyx mori OX=7091 PE=4 SV=1	2.07e-172	99.156	64.5777		sp|P32234|128UP_DROME	GTP-binding protein 128up OS=Drosophila melanogaster OX=7227 GN=128up PE=2 SV=2	0	89.946	100
P_KWMTBOMO04502		tr|Q5TLD3|Q5TLD3_BOMMO	Replication protein A subunit OS=Bombyx mori OX=7091 GN=BmRPA1 PE=2 SV=1	0	99.498	100		sp|Q24492|RFA1_DROME	Replication protein A 70 kDa DNA-binding subunit OS=Drosophila melanogaster OX=7227 GN=RpA-70 PE=1 SV=1	0	47.421	100
P_KWMTBOMO04529		tr|Q2F6C7|Q2F6C7_BOMMO	ADP-ribosylation factor OS=Bombyx mori OX=7091 GN=778456 PE=2 SV=1	9.95e-136	100	100		sp|P61210|ARF1_LOCMI	ADP-ribosylation factor 1 OS=Locusta migratoria OX=7004 GN=ARF1 PE=2 SV=2	7.09e-134	98.901	100
P_KWMTBOMO04605		tr|H9J7K1|H9J7K1_BOMMO	2-phospho-D-glycerate hydro-lyase OS=Bombyx mori OX=7091 PE=3 SV=1	0	100	100		sp|P15007|ENO_DROME	Enolase OS=Drosophila melanogaster OX=7227 GN=Eno PE=1 SV=2	0	81.481	99.7691
P_KWMTBOMO04610		tr|H9J723|H9J723_BOMMO	26S proteasome non-ATPase regulatory subunit 2 OS=Bombyx mori OX=7091 PE=3 SV=1	0	97.303	100		sp|Q5R9I6|PSMD2_PONAB	26S proteasome non-ATPase regulatory subunit 2 OS=Pongo abelii OX=9601 GN=PSMD2 PE=2 SV=1	0	55.556	98.0583
P_KWMTBOMO04676		tr|H9J7M9|H9J7M9_BOMMO	Uncharacterized protein OS=Bombyx mori OX=7091 PE=3 SV=1	0	96.91	100		sp|O00291|HIP1_HUMAN	Huntingtin-interacting protein 1 OS=Homo sapiens OX=9606 GN=HIP1 PE=1 SV=5	4.3e-110	39.219	35.8906
P_KWMTBOMO04768		tr|H9JK00|H9JK00_BOMMO	Valyl-tRNA synthetase OS=Bombyx mori OX=7091 PE=3 SV=1	0	93.973	100		sp|Q04462|SYVC_RAT	Valine--tRNA ligase OS=Rattus norvegicus OX=10116 GN=Vars1 PE=2 SV=2	0	59.277	100
P_KWMTBOMO04789		tr|Q2F5P7|Q2F5P7_BOMMO	Mitochondrial matrix protein p32 OS=Bombyx mori OX=7091 PE=2 SV=1	0	100	100		sp|Q3T0B6|C1QBP_BOVIN	Complement component 1 Q subcomponent-binding protein, mitochondrial OS=Bos taurus OX=9913 GN=C1QBP PE=2 SV=1	7.3e-40	32.042	100
P_KWMTBOMO04806		tr|H9JK60|H9JK60_BOMMO	Ubiquitin-activating enzyme E1 OS=Bombyx mori OX=7091 GN=101739389 PE=3 SV=1	0	99.904	100		sp|Q5U300|UBA1_RAT	Ubiquitin-like modifier-activating enzyme 1 OS=Rattus norvegicus OX=10116 GN=Uba1 PE=1 SV=1	0	65.034	97.8907
P_KWMTBOMO05258		tr|H9IZ08|H9IZ08_BOMMO	Peptidase_M24 domain-containing protein OS=Bombyx mori OX=7091 GN=101746307 PE=3 SV=1	0	100	100		sp|Q6AYD3|PA2G4_RAT	Proliferation-associated protein 2G4 OS=Rattus norvegicus OX=10116 GN=Pa2g4 PE=1 SV=1	1.26e-149	57.778	94.9868
P_KWMTBOMO05541		tr|C7AQP4|C7AQP4_BOMMO	Calcium-transporting ATPase OS=Bombyx mori OX=7091 PE=2 SV=1	0	99.301	100		sp|Q7PPA5|ATC1_ANOGA	Calcium-transporting ATPase sarcoplasmic/endoplasmic reticulum type OS=Anopheles gambiae OX=7165 GN=SERCA PE=3 SV=5	0	89.279	99.6008
P_KWMTBOMO05564		tr|Q2F6A6|Q2F6A6_BOMMO	Elongation factor Tu OS=Bombyx mori OX=7091 PE=2 SV=1	0	100	100		sp|P49411|EFTU_HUMAN	Elongation factor Tu, mitochondrial OS=Homo sapiens OX=9606 GN=TUFM PE=1 SV=2	0	65.672	86.4516
P_KWMTBOMO05566		tr|Q2F5M1|Q2F5M1_BOMMO	GTP-binding nuclear protein OS=Bombyx mori OX=7091 GN=692970 PE=2 SV=1	1.62e-162	100	100		sp|Q9VZ23|RAN_DROME	GTP-binding nuclear protein Ran OS=Drosophila melanogaster OX=7227 GN=Ran PE=1 SV=1	2.67e-147	91.429	98.5915
P_KWMTBOMO05612		tr|H9JB77|H9JB77_BOMMO	SAM_MT_RSMB_NOP domain-containing protein OS=Bombyx mori OX=7091 GN=101741314 PE=3 SV=1	0	99.874	100		sp|Q922K7|NOP2_MOUSE	Probable 28S rRNA (cytosine-C(5))-methyltransferase OS=Mus musculus OX=10090 GN=Nop2 PE=1 SV=1	0	53.565	72.6928
P_KWMTBOMO05741		tr|A1E129|A1E129_BOMMO	Kinesin-like protein OS=Bombyx mori OX=7091 PE=3 SV=2	0	99.17	100		sp|P17210|KINH_DROME	Kinesin heavy chain OS=Drosophila melanogaster OX=7227 GN=Khc PE=1 SV=2	0	74.871	100
P_KWMTBOMO05975		tr|H9J059|H9J059_BOMMO	Tr-type G domain-containing protein OS=Bombyx mori OX=7091 PE=4 SV=1	0	100	100		sp|Q5R8Q7|GTPB1_PONAB	GTP-binding protein 1 (Fragment) OS=Pongo abelii OX=9601 GN=GTPBP1 PE=2 SV=2	2.41e-105	74.641	75.7246
P_KWMTBOMO06082		tr|H9IWS5|H9IWS5_BOMMO	Uncharacterized protein OS=Bombyx mori OX=7091 GN=101739385 PE=4 SV=1	0	100	100		--	--	--	--	--
P_KWMTBOMO06229		tr|H9IX17|H9IX17_BOMMO	Ribos_L4_asso_C domain-containing protein OS=Bombyx mori OX=7091 GN=692659 PE=3 SV=1	0	100	100		sp|P09180|RL4_DROME	60S ribosomal protein L4 OS=Drosophila melanogaster OX=7227 GN=RpL4 PE=1 SV=2	0	68.407	88.2488
P_KWMTBOMO06231		tr|H9IX18|H9IX18_BOMMO	RuvB-like helicase OS=Bombyx mori OX=7091 PE=3 SV=1	1.12e-166	98.765	65.1475		sp|Q9DE27|RUVB2_XENLA	RuvB-like 2 OS=Xenopus laevis OX=8355 GN=ruvbl2 PE=2 SV=1	0	81.501	100
P_KWMTBOMO06480		sp|Q5UAS1|RL18_BOMMO	60S ribosomal protein L18 OS=Bombyx mori OX=7091 GN=RpL18 PE=2 SV=1	1.41e-132	100	100		sp|Q5UAS1|RL18_BOMMO	60S ribosomal protein L18 OS=Bombyx mori OX=7091 GN=RpL18 PE=2 SV=1	9.16e-132	100	100
P_KWMTBOMO06595		tr|I3VR81|I3VR81_BOMMO	Aminopeptidase OS=Bombyx mori OX=7091 PE=2 SV=1	0	100	100		sp|P55786|PSA_HUMAN	Puromycin-sensitive aminopeptidase OS=Homo sapiens OX=9606 GN=NPEPPS PE=1 SV=2	0	57.324	100
P_KWMTBOMO06660		tr|Q2F640|Q2F640_BOMMO	Ubiquinol-cytochrome c reductase core protein II OS=Bombyx mori OX=7091 GN=100127121 PE=2 SV=1	0	100	100		sp|P22695|QCR2_HUMAN	Cytochrome b-c1 complex subunit 2, mitochondrial OS=Homo sapiens OX=9606 GN=UQCRC2 PE=1 SV=3	1.22e-72	34.615	95.1945
P_KWMTBOMO06763		tr|H9JR70|H9JR70_BOMMO	Uncharacterized protein OS=Bombyx mori OX=7091 PE=4 SV=1	0	99.694	100		--	--	--	--	--
P_KWMTBOMO06770		tr|H9JRG2|H9JRG2_BOMMO	Carboxylic ester hydrolase OS=Bombyx mori OX=7091 PE=3 SV=1	0	100	89.4934		sp|P35502|ESTF_MYZPE	Esterase FE4 OS=Myzus persicae OX=13164 PE=1 SV=1	8.36e-86	35.577	97.561
P_KWMTBOMO06974		tr|Q5UAQ1|Q5UAQ1_BOMMO	Ribosomal protein L36A OS=Bombyx mori OX=7091 GN=RpL36A PE=2 SV=1	2.04e-71	100	100		sp|Q9NB33|RL44_OCHTR	60S ribosomal protein L44 OS=Ochlerotatus triseriatus OX=7162 GN=RpL44 PE=3 SV=3	5.04e-61	85.577	100
P_KWMTBOMO06999		tr|H9JLS3|H9JLS3_BOMMO	TPR_REGION domain-containing protein OS=Bombyx mori OX=7091 PE=3 SV=1	0	100	100		sp|P31948|STIP1_HUMAN	Stress-induced-phosphoprotein 1 OS=Homo sapiens OX=9606 GN=STIP1 PE=1 SV=1	0	52.007	100
P_KWMTBOMO07323		tr|Q2F6C4|Q2F6C4_BOMMO	T-complex protein 1 subunit delta OS=Bombyx mori OX=7091 PE=2 SV=1	0	99.814	100		sp|Q9NB32|TCPD_OCHTR	T-complex protein 1 subunit delta OS=Ochlerotatus triseriatus OX=7162 PE=2 SV=1	0	69.088	100
P_KWMTBOMO07374		tr|Q0ZAL3|Q0ZAL3_BOMMO	Splicing factor proline-and glutamine-rich OS=Bombyx mori OX=7091 GN=SFPQ PE=2 SV=1	0	99.802	100		sp|Q9GRW7|NONA_DROVI	Protein no-on-transient A OS=Drosophila virilis OX=7244 GN=nonA PE=2 SV=1	5.73e-114	61.132	52.4752
P_KWMTBOMO07554		tr|H9J8L8|H9J8L8_BOMMO	Uncharacterized protein OS=Bombyx mori OX=7091 PE=4 SV=1	8.48e-153	100	53.1863		sp|Q9NQC3|RTN4_HUMAN	Reticulon-4 OS=Homo sapiens OX=9606 GN=RTN4 PE=1 SV=2	2.84e-61	45.494	57.1078
P_KWMTBOMO07589		tr|A0A023SG69|A0A023SG69_BOMMO	Coatomer subunit beta OS=Bombyx mori OX=7091 GN=beta-COP PE=4 SV=1	0	93.705	100		sp|Q5ZIA5|COPB_CHICK	Coatomer subunit beta OS=Gallus gallus OX=9031 GN=COPB1 PE=2 SV=1	0	57.39	100
P_KWMTBOMO07772		tr|Q5UAN4|Q5UAN4_BOMMO	Ribosomal protein S10 OS=Bombyx mori OX=7091 GN=RpS10 PE=2 SV=1	4.4e-118	100	100		sp|Q962R9|RS10_SPOFR	40S ribosomal protein S10 OS=Spodoptera frugiperda OX=7108 GN=RpS10 PE=2 SV=1	1.19e-105	92.453	99.375
P_KWMTBOMO07855		tr|Q2F6C2|Q2F6C2_BOMMO	CCT-beta OS=Bombyx mori OX=7091 GN=692797 PE=2 SV=1	0	100	100		sp|Q3ZBH0|TCPB_BOVIN	T-complex protein 1 subunit beta OS=Bos taurus OX=9913 GN=CCT2 PE=1 SV=3	0	72.15	99.8134
P_KWMTBOMO07857		tr|Q5R1P5|Q5R1P5_BOMMO	Heat shock protein hsp21.4 OS=Bombyx mori OX=7091 GN=Hsp21.4 PE=2 SV=1	4.58e-139	100	100		sp|Q00649|HSPB1_CHICK	Heat shock protein beta-1 OS=Gallus gallus OX=9031 GN=HSPB1 PE=2 SV=1	5.62e-19	47.727	47.0588
P_KWMTBOMO08064		tr|Q5UAR1|Q5UAR1_BOMMO	60S ribosomal protein L27a OS=Bombyx mori OX=7091 GN=RpL27A PE=2 SV=1	3.15e-107	100	100		sp|P47830|RL27A_XENLA	60S ribosomal protein L27a OS=Xenopus laevis OX=8355 GN=rpl27a PE=2 SV=2	1.19e-82	77.027	100
P_KWMTBOMO08106		tr|H9IUY0|H9IUY0_BOMMO	Clathrin light chain OS=Bombyx mori OX=7091 PE=3 SV=1	2.92e-149	98.095	100		sp|Q9VWA1|CLC_DROME	Clathrin light chain OS=Drosophila melanogaster OX=7227 GN=Clc PE=2 SV=1	5.76e-40	46.948	100
P_KWMTBOMO08193		tr|H9JIX2|H9JIX2_BOMMO	Uncharacterized protein OS=Bombyx mori OX=7091 PE=3 SV=1	2.11e-91	98.571	100		sp|O95831|AIFM1_HUMAN	Apoptosis-inducing factor 1, mitochondrial OS=Homo sapiens OX=9606 GN=AIFM1 PE=1 SV=1	4.02e-30	42.958	100
P_KWMTBOMO08310		tr|Q1HQB9|Q1HQB9_BOMMO	Nucleosome assembly protein isoform 1 OS=Bombyx mori OX=7091 PE=2 SV=1	0	100	100		sp|Q5U2Z3|NP1L4_RAT	Nucleosome assembly protein 1-like 4 OS=Rattus norvegicus OX=10116 GN=Nap1l4 PE=1 SV=1	4.23e-97	49.462	94.1772
P_KWMTBOMO08323		tr|H9JI91|H9JI91_BOMMO	Uncharacterized protein OS=Bombyx mori OX=7091 PE=4 SV=1	0	99.643	98.2456		sp|Q5R4J9|NAA15_PONAB	N-alpha-acetyltransferase 15, NatA auxiliary subunit OS=Pongo abelii OX=9601 GN=NAA15 PE=2 SV=1	4.44e-47	41.985	91.9298
P_KWMTBOMO08440		tr|Q5UAM6|Q5UAM6_BOMMO	Ribosomal protein S16 OS=Bombyx mori OX=7091 GN=RpS16 PE=2 SV=1	8.57e-109	100	100		sp|Q95V31|RS16_SPOFR	40S ribosomal protein S16 OS=Spodoptera frugiperda OX=7108 GN=RpS16 PE=2 SV=1	1.88e-104	98.013	100
P_KWMTBOMO08578		tr|H9JDK4|H9JDK4_BOMMO	Multifunctional fusion protein OS=Bombyx mori OX=7091 GN=101741966 PE=3 SV=1	0	100	100		sp|Q7SY23|AL4A1_DANRE	Delta-1-pyrroline-5-carboxylate dehydrogenase, mitochondrial OS=Danio rerio OX=7955 GN=aldh4a1 PE=2 SV=1	0	55.159	94.3363
P_KWMTBOMO08607		tr|H9JEL8|H9JEL8_BOMMO	Uncharacterized protein OS=Bombyx mori OX=7091 PE=4 SV=1	2.44e-142	98.974	54.3175		sp|Q5M9F1|RBM34_RAT	RNA-binding protein 34 OS=Rattus norvegicus OX=10116 GN=Rbm34 PE=1 SV=1	8.14e-07	26.087	64.0669
P_KWMTBOMO08648		tr|H9JEK1|H9JEK1_BOMMO	Uncharacterized protein OS=Bombyx mori OX=7091 PE=3 SV=1	0	91.125	100		sp|P13395|SPTCA_DROME	Spectrin alpha chain OS=Drosophila melanogaster OX=7227 GN=alpha-Spec PE=1 SV=2	0	76.124	100
P_KWMTBOMO08666		tr|Q66SV4|Q66SV4_BOMMO	40S ribosomal protein S23 OS=Bombyx mori OX=7091 GN=S23 PE=2 SV=1	5.48e-103	100	100		sp|Q6EV23|RS23_PAPDA	40S ribosomal protein S23 OS=Papilio dardanus OX=77259 GN=RpS23 PE=2 SV=1	6.27e-101	97.902	100
P_KWMTBOMO08820		tr|Q1HPI5|Q1HPI5_BOMMO	Nucleoside diphosphate kinase OS=Bombyx mori OX=7091 PE=2 SV=1	4.74e-113	100	100		sp|P08879|NDKA_DROME	Nucleoside diphosphate kinase OS=Drosophila melanogaster OX=7227 GN=awd PE=1 SV=3	5.17e-94	81.046	100
P_KWMTBOMO08893		tr|H9JE77|H9JE77_BOMMO	Succinate--CoA ligase [GDP-forming] subunit beta, mitochondrial OS=Bombyx mori OX=7091 GN=101740061 PE=3 SV=1	0	100	100		sp|Q96I99|SUCB2_HUMAN	Succinate--CoA ligase [GDP-forming] subunit beta, mitochondrial OS=Homo sapiens OX=9606 GN=SUCLG2 PE=1 SV=2	1.11e-159	59.231	92.6366
P_KWMTBOMO08956		tr|H9JDY1|H9JDY1_BOMMO	M20_dimer domain-containing protein OS=Bombyx mori OX=7091 PE=3 SV=1	0	99.784	96.8685		sp|Q3ZC84|CNDP2_BOVIN	Cytosolic non-specific dipeptidase OS=Bos taurus OX=9913 GN=CNDP2 PE=2 SV=1	0	58.65	98.9562
P_KWMTBOMO08961		tr|Q5UAQ8|Q5UAQ8_BOMMO	60S ribosomal protein L30 OS=Bombyx mori OX=7091 GN=RpL30 PE=2 SV=1	2.87e-80	100	100		sp|P58375|RL30_SPOFR	60S ribosomal protein L30 OS=Spodoptera frugiperda OX=7108 GN=RpL30 PE=3 SV=1	9.75e-78	99.099	98.2301
P_KWMTBOMO09055		tr|H9JDA5|H9JDA5_BOMMO	Proton-translocating NAD(P)(+) transhydrogenase OS=Bombyx mori OX=7091 PE=3 SV=1	0	93.082	100		sp|P11024|NNTM_BOVIN	NAD(P) transhydrogenase, mitochondrial OS=Bos taurus OX=9913 GN=NNT PE=1 SV=3	0	59.925	100
P_KWMTBOMO09230		tr|H9J1M5|H9J1M5_BOMMO	Uncharacterized protein OS=Bombyx mori OX=7091 PE=3 SV=1	3.45e-75	100	100		sp|P08570|RLA1_DROME	60S acidic ribosomal protein P1 OS=Drosophila melanogaster OX=7227 GN=RpLP1 PE=1 SV=2	1.01e-42	81.25	100
P_KWMTBOMO09355		tr|Q6T3A7|Q6T3A7_BOMMO	Thiol peroxiredoxin OS=Bombyx mori OX=7091 GN=692638 PE=2 SV=1	5.6e-148	100	100		sp|Q9V3P0|PRDX1_DROME	Peroxiredoxin 1 OS=Drosophila melanogaster OX=7227 GN=Jafrac1 PE=1 SV=1	8.32e-117	81.152	97.9487
P_KWMTBOMO09415		tr|H9JTB0|H9JTB0_BOMMO	RNA helicase OS=Bombyx mori OX=7091 GN=101741115 PE=4 SV=1	0	99.765	100		sp|Q27268|DX39B_DROME	ATP-dependent RNA helicase WM6 OS=Drosophila melanogaster OX=7227 GN=Hel25E PE=1 SV=1	0	88.498	100
P_KWMTBOMO09442		tr|Q5UAT5|Q5UAT5_BOMMO	60S ribosomal protein L6 OS=Bombyx mori OX=7091 GN=RpL6 PE=2 SV=1	0	99.634	100		sp|Q6QMZ4|RL6_CHILA	60S ribosomal protein L6 OS=Chinchilla lanigera OX=34839 GN=RPL6 PE=2 SV=3	4.24e-65	48.8	91.5751
P_KWMTBOMO09542		tr|H9JU13|H9JU13_BOMMO	Eukaryotic translation initiation factor 3 subunit A OS=Bombyx mori OX=7091 PE=3 SV=1	0	96.154	90.339		sp|Q173M7|EIF3A_AEDAE	Eukaryotic translation initiation factor 3 subunit A OS=Aedes aegypti OX=7159 GN=eIF3-S10 PE=3 SV=1	0	66.215	68.7288
P_KWMTBOMO09621		tr|H9JTI9|H9JTI9_BOMMO	Eukaryotic translation initiation factor 3 subunit C OS=Bombyx mori OX=7091 GN=eIF3c PE=3 SV=1	0	100	100		sp|Q0ZB76|EIF3C_BOMMO	Eukaryotic translation initiation factor 3 subunit C OS=Bombyx mori OX=7091 GN=eIF3-S8 PE=2 SV=1	0	99.886	100
P_KWMTBOMO09747		tr|B7XFU6|B7XFU6_BOMMO	Clathrin heavy chain OS=Bombyx mori OX=7091 GN=100233163 PE=2 SV=1	0	99.941	100		sp|P29742|CLH_DROME	Clathrin heavy chain OS=Drosophila melanogaster OX=7227 GN=Chc PE=1 SV=1	0	85.196	100
P_KWMTBOMO09808		tr|Q2F6C3|Q2F6C3_BOMMO	Chaperonin subunit 6a zeta OS=Bombyx mori OX=7091 GN=692796 PE=2 SV=1	0	100	100		sp|P80317|TCPZ_MOUSE	T-complex protein 1 subunit zeta OS=Mus musculus OX=10090 GN=Cct6a PE=1 SV=3	0	72.505	100
P_KWMTBOMO10248		tr|H9JCR4|H9JCR4_BOMMO	40S ribosomal protein SA OS=Bombyx mori OX=7091 PE=3 SV=1	0	100	100		sp|Q5UAP4|RSSA_BOMMO	40S ribosomal protein SA OS=Bombyx mori OX=7091 PE=2 SV=1	0	99.673	100
P_KWMTBOMO10283		tr|H9JCM2|H9JCM2_BOMMO	PCI domain-containing protein OS=Bombyx mori OX=7091 GN=692900 PE=3 SV=1	0	100	100		sp|Q9D8W5|PSD12_MOUSE	26S proteasome non-ATPase regulatory subunit 12 OS=Mus musculus OX=10090 GN=Psmd12 PE=1 SV=4	0	59.071	100
P_KWMTBOMO10358		tr|H9JX26|H9JX26_BOMMO	DUF4781 domain-containing protein OS=Bombyx mori OX=7091 PE=4 SV=1	0	79.827	48.3287		--	--	--	--	--
P_KWMTBOMO10493		tr|H9JC69|H9JC69_BOMMO	Eukaryotic translation initiation factor 3 subunit B OS=Bombyx mori OX=7091 PE=3 SV=1	0	99.568	100		sp|Q1HDZ5|EIF3B_BOMMO	Eukaryotic translation initiation factor 3 subunit B OS=Bombyx mori OX=7091 GN=eIF3-S9 PE=2 SV=1	0	99.568	100
P_KWMTBOMO10780		tr|H9JFX9|H9JFX9_BOMMO	Uncharacterized protein OS=Bombyx mori OX=7091 PE=4 SV=1	0	90.138	43.8191		sp|Q9V3P6|PSMD1_DROME	26S proteasome non-ATPase regulatory subunit 1 OS=Drosophila melanogaster OX=7227 GN=Rpn2 PE=1 SV=1	0	71.218	100
P_KWMTBOMO10916		tr|Q1HQ44|Q1HQ44_BOMMO	Proteasome subunit alpha type OS=Bombyx mori OX=7091 PE=2 SV=1	0	100	100		sp|O70435|PSA3_MOUSE	Proteasome subunit alpha type-3 OS=Mus musculus OX=10090 GN=Psma3 PE=1 SV=3	2.47e-130	65.49	100
P_KWMTBOMO11045		tr|H9JRL1|H9JRL1_BOMMO	Uncharacterized protein OS=Bombyx mori OX=7091 PE=3 SV=1	0	28.363	91.5196		sp|Q00963|SPTCB_DROME	Spectrin beta chain OS=Drosophila melanogaster OX=7227 GN=beta-Spec PE=1 SV=2	0	73.055	100
P_KWMTBOMO11061		tr|Q2F5N1|Q2F5N1_BOMMO	Prohibitin OS=Bombyx mori OX=7091 GN=693108 PE=2 SV=1	0	100	100		sp|Q5XIH7|PHB2_RAT	Prohibitin-2 OS=Rattus norvegicus OX=10116 GN=Phb2 PE=1 SV=1	5.66e-158	72.667	100
P_KWMTBOMO11096		tr|A1E9B3|A1E9B3_BOMMO	H(+)-transporting two-sector ATPase OS=Bombyx mori OX=7091 PE=2 SV=1	0	99.676	100		sp|P31400|VATA_MANSE	V-type proton ATPase catalytic subunit A OS=Manduca sexta OX=7130 GN=VHAA PE=2 SV=1	0	98.217	100
P_KWMTBOMO11202		tr|H9JT03|H9JT03_BOMMO	F-actin-capping protein subunit alpha OS=Bombyx mori OX=7091 GN=101738938 PE=3 SV=1	0	100	100		sp|Q9W2N0|CAPZA_DROME	F-actin-capping protein subunit alpha OS=Drosophila melanogaster OX=7227 GN=cpa PE=2 SV=1	1.31e-147	68.44	97.9167
P_KWMTBOMO11255		tr|Q5UAN5|Q5UAN5_BOMMO	40S ribosomal protein S9 OS=Bombyx mori OX=7091 GN=RpS9 PE=2 SV=1	5.62e-140	100	100		sp|B4PEU8|RS9_DROYA	40S ribosomal protein S9 OS=Drosophila yakuba OX=7245 GN=RpS9 PE=2 SV=1	2.83e-117	89.231	100
P_KWMTBOMO11448		tr|H9IXE5|H9IXE5_BOMMO	Uncharacterized protein OS=Bombyx mori OX=7091 GN=733057 PE=4 SV=1	1.36e-160	100	100		sp|P53994|RAB2A_MOUSE	Ras-related protein Rab-2A OS=Mus musculus OX=10090 GN=Rab2a PE=1 SV=1	2.2e-141	90.654	100
P_KWMTBOMO11517		tr|H9J3H3|H9J3H3_BOMMO	Uncharacterized protein OS=Bombyx mori OX=7091 PE=4 SV=1	0	96.387	98.8417		--	--	--	--	--
P_KWMTBOMO11590		tr|H9J3D2|H9J3D2_BOMMO	Ku domain-containing protein OS=Bombyx mori OX=7091 GN=101736121 PE=4 SV=1	0	98.077	80.6897		sp|O93257|XRCC6_CHICK	X-ray repair cross-complementing protein 5 OS=Gallus gallus OX=9031 GN=XRCC6 PE=2 SV=1	5.59e-42	26.126	95.6897
P_KWMTBOMO11666		tr|Q2V0H5|Q2V0H5_BOMMO	Vesicle-fusing ATPase OS=Bombyx mori OX=7091 GN=ter94 PE=2 SV=1	0	100	100		sp|Q7KN62|TERA_DROME	Transitional endoplasmic reticulum ATPase TER94 OS=Drosophila melanogaster OX=7227 GN=TER94 PE=1 SV=1	0	88.025	100
P_KWMTBOMO11680		tr|H9J390|H9J390_BOMMO	Seryl-tRNA synthetase OS=Bombyx mori OX=7091 GN=101743384 PE=3 SV=1	0	100	100		sp|Q9GMB8|SYSC_BOVIN	Serine--tRNA ligase, cytoplasmic OS=Bos taurus OX=9913 GN=SARS1 PE=2 SV=3	0	69.495	100
P_KWMTBOMO11771		tr|Q1HQ18|Q1HQ18_BOMMO	Proteasome endopeptidase complex OS=Bombyx mori OX=7091 GN=100101166 PE=2 SV=1	4.64e-178	100	100		sp|P40304|PSB1_DROME	Proteasome subunit beta type-1 OS=Drosophila melanogaster OX=7227 GN=Prosbeta6 PE=2 SV=2	3.74e-105	62.009	98.7069
P_KWMTBOMO12018		tr|Q5UAN7|Q5UAN7_BOMMO	40S ribosomal protein S7 OS=Bombyx mori OX=7091 GN=RpS7 PE=2 SV=1	1.24e-137	99.474	100		sp|P48155|RS7_MANSE	40S ribosomal protein S7 OS=Manduca sexta OX=7130 GN=RpS7 PE=2 SV=1	1.42e-134	97.368	100
P_KWMTBOMO12166		tr|H9JWZ4|H9JWZ4_BOMMO	NADH dehydrogenase [ubiquinone] 1 alpha subcomplex subunit 10, mitochondrial OS=Bombyx mori OX=7091 GN=101745480 PE=3 SV=1	0	100	100		sp|P91929|NDUAA_DROME	NADH dehydrogenase [ubiquinone] 1 alpha subcomplex subunit 10, mitochondrial OS=Drosophila melanogaster OX=7227 GN=ND-42 PE=1 SV=2	1.8e-134	49.485	97.4874
P_KWMTBOMO12264		tr|H9JHZ0|H9JHZ0_BOMMO	CYTOSOL_AP domain-containing protein OS=Bombyx mori OX=7091 PE=3 SV=1	0	93.99	79.5411		sp|Q5R7G6|PEPL1_PONAB	Probable aminopeptidase NPEPL1 OS=Pongo abelii OX=9601 GN=NPEPL1 PE=3 SV=2	0	54.981	99.8088
P_KWMTBOMO12304		tr|H9JHX3|H9JHX3_BOMMO	4_1_CTD domain-containing protein OS=Bombyx mori OX=7091 PE=4 SV=1	0	98.443	72.6316		sp|Q9V8R9|EPB41_DROME	Protein 4.1 homolog OS=Drosophila melanogaster OX=7227 GN=cora PE=1 SV=1	0	52.778	36.4912
P_KWMTBOMO12389		tr|H9JSC6|H9JSC6_BOMMO	Coatomer subunit epsilon OS=Bombyx mori OX=7091 PE=3 SV=1	0	100	100		sp|Q5ZIK9|COPE_CHICK	Coatomer subunit epsilon OS=Gallus gallus OX=9031 GN=COPE PE=2 SV=1	6.42e-96	48.475	97.6821
P_KWMTBOMO12428		sp|Q5UAS2|RL17_BOMMO	60S ribosomal protein L17 OS=Bombyx mori OX=7091 GN=RpL17 PE=2 SV=1	5.32e-141	100	100		sp|Q5UAS2|RL17_BOMMO	60S ribosomal protein L17 OS=Bombyx mori OX=7091 GN=RpL17 PE=2 SV=1	3.47e-140	100	100
P_KWMTBOMO12667		tr|Q1HPM7|Q1HPM7_BOMMO	Mitochondrial aldehyde dehydrogenase OS=Bombyx mori OX=7091 PE=2 SV=1	0	97.291	47.2281		sp|P81178|ALDH2_MESAU	Aldehyde dehydrogenase, mitochondrial OS=Mesocricetus auratus OX=10036 GN=ALDH2 PE=1 SV=1	0	70	45.8422
P_KWMTBOMO12844		tr|H9U396|H9U396_BOMMO	Endoplasmin-like protein OS=Bombyx mori OX=7091 PE=2 SV=1	0	100	100		sp|Q66HD0|ENPL_RAT	Endoplasmin OS=Rattus norvegicus OX=10116 GN=Hsp90b1 PE=1 SV=2	0	59.264	93.9506
P_KWMTBOMO13235		tr|H9JKC3|H9JKC3_BOMMO	Transket_pyr domain-containing protein OS=Bombyx mori OX=7091 PE=3 SV=1	0	83.749	100		sp|Q60HE2|ODO1_MACFA	2-oxoglutarate dehydrogenase, mitochondrial OS=Macaca fascicularis OX=9541 GN=OGDH PE=2 SV=1	0	62.761	98.6288
P_KWMTBOMO13293		tr|E9JEI6|E9JEI6_BOMMO	Poly [ADP-ribose] polymerase (Fragment) OS=Bombyx mori OX=7091 PE=2 SV=1	0	99.894	94.5		sp|Q11208|PARP_SARPE	Poly [ADP-ribose] polymerase OS=Sarcophaga peregrina OX=7386 PE=1 SV=1	0	48.473	100
P_KWMTBOMO13370		tr|H9JN38|H9JN38_BOMMO	Signal recognition particle subunit SRP72 OS=Bombyx mori OX=7091 PE=3 SV=1	0	100	66.306		sp|O76094|SRP72_HUMAN	Signal recognition particle subunit SRP72 OS=Homo sapiens OX=9606 GN=SRP72 PE=1 SV=3	7.11e-121	37.721	96.2906
P_KWMTBOMO13405		tr|H9JN03|H9JN03_BOMMO	Proliferating cell nuclear antigen OS=Bombyx mori OX=7091 GN=692356 PE=3 SV=1	0	100	100		sp|O01377|PCNA_BOMMO	Proliferating cell nuclear antigen OS=Bombyx mori OX=7091 GN=PCNA PE=2 SV=1	0	98.846	100
P_KWMTBOMO13721		tr|A1YM11|A1YM11_BOMMO	CCT-theta OS=Bombyx mori OX=7091 PE=2 SV=1	0	99.45	100		sp|Q6EE31|TCPQ_CHICK	T-complex protein 1 subunit theta OS=Gallus gallus OX=9031 GN=CCT8 PE=1 SV=3	0	63.72	99.633
P_KWMTBOMO13729		tr|Q684K3|Q684K3_BOMMO	Protein-synthesizing GTPase OS=Bombyx mori OX=7091 GN=eIF2g PE=2 SV=1	0	100	100		sp|Q24208|IF2G_DROME	Eukaryotic translation initiation factor 2 subunit 3 OS=Drosophila melanogaster OX=7227 GN=eIF2gamma PE=2 SV=1	0	84.12	99.5726
P_KWMTBOMO13960		tr|Q5UAN0|Q5UAN0_BOMMO	40S ribosomal protein S13 OS=Bombyx mori OX=7091 GN=RpS13 PE=2 SV=1	8.93e-110	100	100		sp|Q962R6|RS13_SPOFR	40S ribosomal protein S13 OS=Spodoptera frugiperda OX=7108 GN=RpS13 PE=2 SV=3	1.63e-108	99.338	100
P_KWMTBOMO14440		tr|Q1HPP5|Q1HPP5_BOMMO	Actin-depolymerizing factor 1 OS=Bombyx mori OX=7091 PE=2 SV=1	1.7e-108	100	100		sp|P45594|CADF_DROME	Cofilin/actin-depolymerizing factor homolog OS=Drosophila melanogaster OX=7227 GN=tsr PE=1 SV=1	2.22e-100	92.568	100
P_KWMTBOMO14479		tr|H9IS48|H9IS48_BOMMO	Uncharacterized protein OS=Bombyx mori OX=7091 GN=101742289 PE=3 SV=1	7.91e-100	100	100		sp|Q8I1F4|FBRL_DROER	rRNA 2'-O-methyltransferase fibrillarin OS=Drosophila erecta OX=7220 GN=Fib PE=3 SV=1	2.11e-41	82.278	50
P_KWMTBOMO14549		tr|I6XKQ0|I6XKQ0_BOMMO	Heat shock protein 70-5 OS=Bombyx mori OX=7091 PE=2 SV=1	0	99.565	100		sp|P29845|HSP7E_DROME	Heat shock 70 kDa protein cognate 5 OS=Drosophila melanogaster OX=7227 GN=Hsc70-5 PE=1 SV=2	0	81.86	93.4783
P_KWMTBOMO14732		tr|Q86PG2|Q86PG2_BOMMO	ADP/ATP translocase OS=Bombyx mori OX=7091 GN=ANT PE=2 SV=1	0	100	100		sp|Q26365|ADT_DROME	ADP,ATP carrier protein OS=Drosophila melanogaster OX=7227 GN=sesB PE=2 SV=4	0	87.458	98.3333
P_KWMTBOMO14761		tr|H9J2S8|H9J2S8_BOMMO	Dihydrolipoyllysine-residue succinyltransferase component of 2-oxoglutarate dehydrogenase complex, mitochondrial OS=Bombyx mori OX=7091 PE=3 SV=1	0	78.71	100		sp|P11179|ODO2_BOVIN	Dihydrolipoyllysine-residue succinyltransferase component of 2-oxoglutarate dehydrogenase complex, mitochondrial OS=Bos taurus OX=9913 GN=DLST PE=1 SV=2	8.56e-150	56.542	92.043
P_KWMTBOMO14887		tr|H9JRM2|H9JRM2_BOMMO	T-complex protein 1 subunit eta OS=Bombyx mori OX=7091 PE=3 SV=1	0	99.631	100		sp|Q5ZJK8|TCPH_CHICK	T-complex protein 1 subunit eta OS=Gallus gallus OX=9031 GN=CCT7 PE=1 SV=1	0	69.376	97.6015
P_KWMTBOMO14984		tr|H9J5J2|H9J5J2_BOMMO	AAA domain-containing protein OS=Bombyx mori OX=7091 PE=3 SV=1	0	100	100		sp|O42587|PR6AA_XENLA	26S proteasome regulatory subunit 6A-A OS=Xenopus laevis OX=8355 GN=psmc3-a PE=2 SV=2	0	88.124	98.3645
P_KWMTBOMO15060		tr|H9J5R2|H9J5R2_BOMMO	Protein transport protein SEC23 OS=Bombyx mori OX=7091 PE=3 SV=1	0	100	100		sp|Q01405|SC23A_MOUSE	Protein transport protein Sec23A OS=Mus musculus OX=10090 GN=Sec23a PE=1 SV=2	0	74.583	100
P_KWMTBOMO15114		tr|Q5UAL8|Q5UAL8_BOMMO	40S ribosomal protein S25 OS=Bombyx mori OX=7091 GN=RpS25 PE=2 SV=1	7.13e-83	100	100		sp|Q962Q5|RS25_SPOFR	40S ribosomal protein S25 OS=Spodoptera frugiperda OX=7108 GN=RpS25 PE=3 SV=1	1.98e-81	99.16	100
P_KWMTBOMO15123		tr|H9J5W8|H9J5W8_BOMMO	AAA domain-containing protein OS=Bombyx mori OX=7091 PE=3 SV=2	0	99.241	90.389		sp|P48601|PRS4_DROME	26S proteasome regulatory subunit 4 OS=Drosophila melanogaster OX=7227 GN=Rpt2 PE=1 SV=2	0	96.811	100
P_KWMTBOMO15357		tr|H9J6H5|H9J6H5_BOMMO	Prolyl-tRNA synthetase OS=Bombyx mori OX=7091 PE=3 SV=1	0	98.315	99.6403		sp|P28668|SYEP_DROME	Bifunctional glutamate/proline--tRNA ligase OS=Drosophila melanogaster OX=7227 GN=GluProRS PE=1 SV=2	0	61.306	99.1607
P_KWMTBOMO15359		tr|H9J6H4|H9J6H4_BOMMO	Glutamyl-tRNA synthetase OS=Bombyx mori OX=7091 PE=3 SV=1	0	100	97.0994		sp|P28668|SYEP_DROME	Bifunctional glutamate/proline--tRNA ligase OS=Drosophila melanogaster OX=7227 GN=GluProRS PE=1 SV=2	0	60.526	99.7238
P_KWMTBOMO15361		tr|O16143|O16143_BOMMO	Rab1 protein OS=Bombyx mori OX=7091 GN=rabB PE=2 SV=1	5.31e-153	100	100		sp|Q05974|RAB1A_LYMST	Ras-related protein Rab-1A OS=Lymnaea stagnalis OX=6523 GN=RAB1A PE=2 SV=1	4.74e-124	81.188	100
P_KWMTBOMO15518		tr|Q1HPL0|Q1HPL0_BOMMO	26S proteasome regulatory ATPase subunit 10B OS=Bombyx mori OX=7091 PE=2 SV=1	0	100	100		sp|P62334|PRS10_MOUSE	26S proteasome regulatory subunit 10B OS=Mus musculus OX=10090 GN=Psmc6 PE=1 SV=1	0	88.571	97.2222
P_KWMTBOMO15712		tr|Q2F5N9|Q2F5N9_BOMMO	Nucleoplasmin isoform 2 OS=Bombyx mori OX=7091 GN=692956 PE=2 SV=1	7.05e-137	100	100		sp|Q27415|NLP_DROME	Nucleoplasmin-like protein OS=Drosophila melanogaster OX=7227 GN=Nlp PE=1 SV=1	2.34e-29	48.148	57.754
P_KWMTBOMO15715		tr|H9IYH6|H9IYH6_BOMMO	Uncharacterized protein OS=Bombyx mori OX=7091 PE=4 SV=1	0	86.272	98.3282		--	--	--	--	--
P_KWMTBOMO15758		tr|B3VBE3|B3VBE3_BOMMO	Vacuolar proton pump subunit B OS=Bombyx mori OX=7091 PE=2 SV=1	0	99.278	88.2166		sp|P31401|VATB_MANSE	V-type proton ATPase subunit B OS=Manduca sexta OX=7130 GN=VHA55 PE=2 SV=1	0	97.112	88.2166
P_KWMTBOMO15781		tr|H9IYL2|H9IYL2_BOMMO	Uncharacterized protein OS=Bombyx mori OX=7091 PE=3 SV=2	0	87.5	100		sp|O46036|CTBP_DROME	C-terminal-binding protein OS=Drosophila melanogaster OX=7227 GN=CtBP PE=1 SV=3	0	91.643	78.9011
P_KWMTBOMO16197		tr|Q1HPX4|Q1HPX4_BOMMO	ATP synthase subunit gamma OS=Bombyx mori OX=7091 GN=732965 PE=2 SV=1	0	100	100		sp|O01666|ATPG_DROME	ATP synthase subunit gamma, mitochondrial OS=Drosophila melanogaster OX=7227 GN=ATPsyngamma PE=2 SV=2	2.51e-151	73.05	95.2703
P_KWMTBOMO16261		tr|Q2F6A0|Q2F6A0_BOMMO	Exuperantia OS=Bombyx mori OX=7091 PE=2 SV=1	0	100	100		sp|Q24747|EXU_DROVI	Maternal protein exuperantia OS=Drosophila virilis OX=7244 GN=exu PE=3 SV=1	5.4e-82	39.231	94.431
P_KWMTBOMO16357		tr|Q5UAN3|Q5UAN3_BOMMO	40S ribosomal protein S11 OS=Bombyx mori OX=7091 GN=RpS11-1 PE=2 SV=1	6e-114	100	100		sp|P62280|RS11_HUMAN	40S ribosomal protein S11 OS=Homo sapiens OX=9606 GN=RPS11 PE=1 SV=3	4.63e-88	77.848	100
P_KWMTBOMO16524		tr|H9J7Z3|H9J7Z3_BOMMO	RRM domain-containing protein OS=Bombyx mori OX=7091 PE=3 SV=1	1e-90	76.064	100		sp|Q5R1W5|SRSF2_PANTR	Serine/arginine-rich splicing factor 2 OS=Pan troglodytes OX=9598 GN=SRSF2 PE=2 SV=3	1.89e-49	77.083	62.3377

## Sheet: common PIPs of P25
Name	Bombyx-mori	Subject ID	Description	e-value	identity(%)	coverage(%)	Metazoa	Subject ID	Description	e-value	identity(%)	coverage(%)
P_KWMTBOMO00339		tr|H9ITE6|H9ITE6_BOMMO	CSD_1 domain-containing protein OS=Bombyx mori OX=7091 PE=4 SV=1	0	100	100		sp|P41824|YBOXH_APLCA	Y-box factor homolog OS=Aplysia californica OX=6500 PE=2 SV=1	1.24e-50	69.106	47.4903
P_KWMTBOMO00366		tr|H9ITD6|H9ITD6_BOMMO	Uncharacterized protein OS=Bombyx mori OX=7091 PE=4 SV=1	0	99.775	83.8041		sp|O42254|IF2B1_CHICK	Insulin-like growth factor 2 mRNA-binding protein 1 OS=Gallus gallus OX=9031 GN=IGF2BP1 PE=1 SV=1	7.53e-128	44.578	93.7853
P_KWMTBOMO00375		tr|H9ITY5|H9ITY5_BOMMO	Uncharacterized protein OS=Bombyx mori OX=7091 PE=3 SV=1	0	87.972	100		sp|Q9VSA3|ACADM_DROME	Probable medium-chain specific acyl-CoA dehydrogenase, mitochondrial OS=Drosophila melanogaster OX=7227 GN=CG12262 PE=2 SV=1	0	73.558	98.3452
P_KWMTBOMO00427		tr|Q9NKX3|Q9NKX3_BOMMO	Coatomer subunit gamma OS=Bombyx mori OX=7091 GN=copg1 PE=2 SV=1	0	99.884	100		sp|Q8I0G5|COPG_DROME	Coatomer subunit gamma OS=Drosophila melanogaster OX=7227 GN=gammaCOP PE=2 SV=1	0	57.555	100
P_KWMTBOMO00462		tr|D9N4J4|D9N4J4_BOMMO	Staphylococcal nuclease domain-containing protein OS=Bombyx mori OX=7091 GN=Tudor-SN PE=2 SV=1	0	99.887	100		sp|Q9W0S7|SND1_DROME	Staphylococcal nuclease domain-containing protein 1 OS=Drosophila melanogaster OX=7227 GN=Tudor-SN PE=1 SV=1	0	52.412	100
P_KWMTBOMO00497		tr|H9JRZ9|H9JRZ9_BOMMO	Uncharacterized protein OS=Bombyx mori OX=7091 PE=3 SV=1	0	100	100		sp|Q60HD7|SERA_MACFA	D-3-phosphoglycerate dehydrogenase OS=Macaca fascicularis OX=9541 GN=PHGDH PE=2 SV=4	2.42e-109	50.814	93.8838
P_KWMTBOMO00638		tr|D2Y4R4|D2Y4R4_BOMMO	Coatomer subunit beta' OS=Bombyx mori OX=7091 GN=COPB2 PE=2 SV=1	0	99.877	99.2692		sp|O62621|COPB2_DROME	Coatomer subunit beta' OS=Drosophila melanogaster OX=7227 GN=beta'COP PE=2 SV=2	0	71.059	98.9038
P_KWMTBOMO00794		tr|Q1HQ81|Q1HQ81_BOMMO	Nascent polypeptide associated complex protein alpha subunit OS=Bombyx mori OX=7091 PE=2 SV=1	1.91e-153	100	100		sp|Q94518|NACA_DROME	Nascent polypeptide-associated complex subunit alpha OS=Drosophila melanogaster OX=7227 GN=Nacalpha PE=1 SV=2	1.16e-78	65.455	100
P_KWMTBOMO00838		tr|Q5UAR6|Q5UAR6_BOMMO	60S ribosomal protein L23 OS=Bombyx mori OX=7091 GN=RpL23 PE=2 SV=1	5.38e-99	100	100		sp|P48159|RL23_DROME	60S ribosomal protein L23 OS=Drosophila melanogaster OX=7227 GN=RpL23 PE=1 SV=2	5.37e-94	95	100
P_KWMTBOMO00927		tr|H9JJU3|H9JJU3_BOMMO	Aspartate--tRNA ligase, cytoplasmic OS=Bombyx mori OX=7091 PE=3 SV=1	0	100	71.2204		sp|Q3SYZ4|SYDC_BOVIN	Aspartate--tRNA ligase, cytoplasmic OS=Bos taurus OX=9913 GN=DARS1 PE=2 SV=1	0	64.329	90.8925
P_KWMTBOMO01072		tr|H9JD17|H9JD17_BOMMO	Uncharacterized protein OS=Bombyx mori OX=7091 PE=4 SV=1	0	99.688	40.0249		sp|Q9W3N6|USO1_DROME	General vesicular transport factor p115 OS=Drosophila melanogaster OX=7227 GN=p115 PE=1 SV=2	0	50.619	100
P_KWMTBOMO01075		tr|H9JCV2|H9JCV2_BOMMO	Uncharacterized protein OS=Bombyx mori OX=7091 GN=101741707 PE=3 SV=1	0	99.629	100		sp|O02649|CH60A_DROME	Heat shock protein 60A OS=Drosophila melanogaster OX=7227 GN=Hsp60A PE=1 SV=3	0	84.72	95.9184
P_KWMTBOMO01273		tr|Q5UAS5|Q5UAS5_BOMMO	60S ribosomal protein L13a OS=Bombyx mori OX=7091 GN=RpL13A PE=2 SV=1	3.08e-151	100	100		sp|Q8MUR4|RL13A_CHOPR	60S ribosomal protein L13a OS=Choristoneura parallela OX=106495 GN=RpL13A PE=2 SV=1	3.13e-140	91.667	100
P_KWMTBOMO01424		tr|H9JHC4|H9JHC4_BOMMO	Elongation factor 1-beta' OS=Bombyx mori OX=7091 PE=3 SV=1	5.51e-165	100	100		sp|P29522|EF1B2_BOMMO	Elongation factor 1-beta' OS=Bombyx mori OX=7091 PE=1 SV=2	3.22e-163	99.55	100
P_KWMTBOMO01452		tr|H9JHD3|H9JHD3_BOMMO	Arginyl-tRNA synthetase OS=Bombyx mori OX=7091 GN=101737924 PE=3 SV=1	0	100	100		sp|Q6P1S4|SYRC_XENTR	Arginine--tRNA ligase, cytoplasmic OS=Xenopus tropicalis OX=8364 GN=rars1 PE=2 SV=1	0	58.85	99.2679
P_KWMTBOMO01606		tr|H9J993|H9J993_BOMMO	Nop domain-containing protein OS=Bombyx mori OX=7091 GN=101742458 PE=3 SV=1	0	99.436	100		sp|Q9Y2X3|NOP58_HUMAN	Nucleolar protein 58 OS=Homo sapiens OX=9606 GN=NOP58 PE=1 SV=1	0	63.377	86.2004
P_KWMTBOMO01708		tr|H9J9C9|H9J9C9_BOMMO	Dynein light intermediate chain OS=Bombyx mori OX=7091 PE=3 SV=1	2.61e-111	99.367	34.0517		sp|Q6PDL0|DC1L2_MOUSE	Cytoplasmic dynein 1 light intermediate chain 2 OS=Mus musculus OX=10090 GN=Dync1li2 PE=1 SV=2	2.12e-142	50.33	98.0603
P_KWMTBOMO01720		tr|H9J930|H9J930_BOMMO	Uncharacterized protein OS=Bombyx mori OX=7091 PE=4 SV=1	0	98.191	100		sp|Q26457|LA_AEDAL	La protein homolog OS=Aedes albopictus OX=7160 PE=1 SV=1	2.92e-91	44.225	93.4211
P_KWMTBOMO01918		tr|Q2F5L5|Q2F5L5_BOMMO	Protein transport protein Sec61 subunit beta OS=Bombyx mori OX=7091 GN=733070 PE=2 SV=1	1.66e-65	100	100		sp|P60467|SC61B_CANLF	Protein transport protein Sec61 subunit beta OS=Canis lupus familiaris OX=9615 GN=SEC61B PE=1 SV=2	2.67e-41	71.277	96.9072
P_KWMTBOMO01927		sp|P21894|SYAC_BOMMO	Alanine--tRNA ligase, cytoplasmic OS=Bombyx mori OX=7091 PE=1 SV=1	0	99.276	100		sp|P21894|SYAC_BOMMO	Alanine--tRNA ligase, cytoplasmic OS=Bombyx mori OX=7091 PE=1 SV=1	0	99.276	100
P_KWMTBOMO02061		tr|Q1HPU7|Q1HPU7_BOMMO	Adenosylhomocysteinase OS=Bombyx mori OX=7091 PE=2 SV=1	0	100	100		sp|O76757|SAHH_ANOGA	Adenosylhomocysteinase OS=Anopheles gambiae OX=7165 GN=Ahcy13 PE=2 SV=2	0	80.233	100
P_KWMTBOMO02081		tr|Q1HPW2|Q1HPW2_BOMMO	RNA helicase OS=Bombyx mori OX=7091 GN=692781 PE=2 SV=1	0	100	100		sp|Q02748|IF4A_DROME	Eukaryotic initiation factor 4A OS=Drosophila melanogaster OX=7227 GN=eIF4A PE=1 SV=3	0	79.949	93.8095
P_KWMTBOMO02096		tr|H9J0Z1|H9J0Z1_BOMMO	Uncharacterized protein OS=Bombyx mori OX=7091 GN=101739980 PE=4 SV=1	0	100	100		sp|Q01650|LAT1_HUMAN	Large neutral amino acids transporter small subunit 1 OS=Homo sapiens OX=9606 GN=SLC7A5 PE=1 SV=2	2.52e-159	50.734	95.9759
P_KWMTBOMO02185		tr|Q2F5X2|Q2F5X2_BOMMO	Proteasome subunit alpha type OS=Bombyx mori OX=7091 GN=692896 PE=2 SV=1	0	100	100		sp|P22769|PSA71_DROME	Proteasome subunit alpha type-7-1 OS=Drosophila melanogaster OX=7227 GN=Prosalpha4 PE=1 SV=2	2.5e-145	81.818	92.7711
P_KWMTBOMO02223		tr|Q1HQC7|Q1HQC7_BOMMO	Aspartate aminotransferase OS=Bombyx mori OX=7091 PE=2 SV=1	0	99.768	100		sp|P00507|AATM_RAT	Aspartate aminotransferase, mitochondrial OS=Rattus norvegicus OX=10116 GN=Got2 PE=1 SV=2	0	62.06	92.3434
P_KWMTBOMO02431		tr|Q1HQ25|Q1HQ25_BOMMO	ATP synthase subunit OS=Bombyx mori OX=7091 GN=732934 PE=2 SV=1	2.04e-70	100	100		sp|Q5RFH0|ATP5L_PONAB	ATP synthase subunit g, mitochondrial OS=Pongo abelii OX=9601 GN=ATP5MG PE=3 SV=1	1.02e-32	52.632	95.9596
P_KWMTBOMO02470		tr|H9IZ85|H9IZ85_BOMMO	Dolichyl-diphosphooligosaccharide--protein glycosyltransferase subunit 1 OS=Bombyx mori OX=7091 PE=3 SV=1	0	100	98.9316		sp|E2RQ08|RPN1_CANLF	Dolichyl-diphosphooligosaccharide--protein glycosyltransferase subunit 1 OS=Canis lupus familiaris OX=9615 GN=RPN1 PE=1 SV=1	6.16e-166	53.811	92.5214
P_KWMTBOMO02835		tr|H9J2D4|H9J2D4_BOMMO	RPN13_C domain-containing protein OS=Bombyx mori OX=7091 PE=3 SV=1	0	97.136	100		sp|Q6NZ09|ADRM1_DANRE	Proteasomal ubiquitin receptor ADRM1 OS=Danio rerio OX=7955 GN=adrm1b PE=1 SV=1	1.84e-92	45.524	96.0688
P_KWMTBOMO03067		tr|H9J8B0|H9J8B0_BOMMO	Tripeptidyl-peptidase 2 OS=Bombyx mori OX=7091 GN=101742969 PE=4 SV=1	0	100	100		sp|P29144|TPP2_HUMAN	Tripeptidyl-peptidase 2 OS=Homo sapiens OX=9606 GN=TPP2 PE=1 SV=4	0	41.24	100
P_KWMTBOMO03173		tr|Q1HPV7|Q1HPV7_BOMMO	Histone H2A OS=Bombyx mori OX=7091 GN=h2a.z PE=2 SV=1	1.2e-88	100	100		sp|Q6Y237|H2AV_PAGMA	Histone H2A.V OS=Pagrus major OX=143350 GN=h2az2 PE=2 SV=3	3.37e-81	97.561	95.3488
P_KWMTBOMO03177		tr|H9JV99|H9JV99_BOMMO	BRO1 domain-containing protein OS=Bombyx mori OX=7091 PE=4 SV=1	0	97.718	100		sp|Q9QZA2|PDC6I_RAT	Programmed cell death 6-interacting protein OS=Rattus norvegicus OX=10116 GN=Pdcd6ip PE=1 SV=2	0	43.273	98.3629
P_KWMTBOMO03314		tr|Q5UAS3|Q5UAS3_BOMMO	Ribosomal protein L15 OS=Bombyx mori OX=7091 GN=RpL15 PE=2 SV=1	2.87e-148	100	100		sp|P30736|RL15_CHITE	60S ribosomal protein L15 OS=Chironomus tentans OX=7153 GN=RpL15 PE=3 SV=3	3.13e-122	80.392	100
P_KWMTBOMO03430		tr|Q2F5R4|Q2F5R4_BOMMO	Glutamate dehydrogenase (NAD(P)(+)) OS=Bombyx mori OX=7091 GN=692939 PE=2 SV=1	0	100	74.3869		sp|P54385|DHE3_DROME	Glutamate dehydrogenase, mitochondrial OS=Drosophila melanogaster OX=7227 GN=Gdh PE=1 SV=2	0	79.821	76.2943
P_KWMTBOMO03626		tr|H9J9S0|H9J9S0_BOMMO	CCT-alpha OS=Bombyx mori OX=7091 GN=101742382 PE=3 SV=1	0	100	100		sp|P12613|TCPA_DROME	T-complex protein 1 subunit alpha OS=Drosophila melanogaster OX=7227 GN=CCT1 PE=2 SV=2	0	80.576	100
P_KWMTBOMO03630		tr|H9J9R7|H9J9R7_BOMMO	Uncharacterized protein OS=Bombyx mori OX=7091 PE=4 SV=1	2.53e-122	74.359	44.1748		sp|Q7TMK9|HNRPQ_MOUSE	Heterogeneous nuclear ribonucleoprotein Q OS=Mus musculus OX=10090 GN=Syncrip PE=1 SV=2	1.08e-179	55.031	78.8026
P_KWMTBOMO03860		tr|H9JKX7|H9JKX7_BOMMO	Uncharacterized protein OS=Bombyx mori OX=7091 PE=3 SV=1	0	97.603	100		sp|P26686|SRR55_DROME	Serine-arginine protein 55 OS=Drosophila melanogaster OX=7227 GN=B52 PE=1 SV=4	6.44e-97	77.487	66.7832
P_KWMTBOMO04168		tr|H9JGM3|H9JGM3_BOMMO	Uncharacterized protein OS=Bombyx mori OX=7091 PE=3 SV=1	0	100	100		sp|Q94516|AT5F1_DROME	ATP synthase subunit b, mitochondrial OS=Drosophila melanogaster OX=7227 GN=ATPsynB PE=2 SV=2	1.44e-101	69.036	81.07
P_KWMTBOMO04370		tr|H9J6V7|H9J6V7_BOMMO	OBG-type G domain-containing protein OS=Bombyx mori OX=7091 PE=4 SV=1	2.07e-172	99.156	64.5777		sp|P32234|128UP_DROME	GTP-binding protein 128up OS=Drosophila melanogaster OX=7227 GN=128up PE=2 SV=2	0	89.946	100
P_KWMTBOMO04502		tr|Q5TLD3|Q5TLD3_BOMMO	Replication protein A subunit OS=Bombyx mori OX=7091 GN=BmRPA1 PE=2 SV=1	0	99.498	100		sp|Q24492|RFA1_DROME	Replication protein A 70 kDa DNA-binding subunit OS=Drosophila melanogaster OX=7227 GN=RpA-70 PE=1 SV=1	0	47.421	100
P_KWMTBOMO04605		tr|H9J7K1|H9J7K1_BOMMO	2-phospho-D-glycerate hydro-lyase OS=Bombyx mori OX=7091 PE=3 SV=1	0	100	100		sp|P15007|ENO_DROME	Enolase OS=Drosophila melanogaster OX=7227 GN=Eno PE=1 SV=2	0	81.481	99.7691
P_KWMTBOMO04610		tr|H9J723|H9J723_BOMMO	26S proteasome non-ATPase regulatory subunit 2 OS=Bombyx mori OX=7091 PE=3 SV=1	0	97.303	100		sp|Q5R9I6|PSMD2_PONAB	26S proteasome non-ATPase regulatory subunit 2 OS=Pongo abelii OX=9601 GN=PSMD2 PE=2 SV=1	0	55.556	98.0583
P_KWMTBOMO04806		tr|H9JK60|H9JK60_BOMMO	Ubiquitin-activating enzyme E1 OS=Bombyx mori OX=7091 GN=101739389 PE=3 SV=1	0	99.904	100		sp|Q5U300|UBA1_RAT	Ubiquitin-like modifier-activating enzyme 1 OS=Rattus norvegicus OX=10116 GN=Uba1 PE=1 SV=1	0	65.034	97.8907
P_KWMTBOMO05205		tr|H9IYX7|H9IYX7_BOMMO	5-aminoimidazole-4-carboxamide ribonucleotide formyltransferase OS=Bombyx mori OX=7091 PE=3 SV=1	0	100	98.8156		sp|P31335|PUR9_CHICK	Bifunctional purine biosynthesis protein ATIC OS=Gallus gallus OX=9031 GN=ATIC PE=1 SV=1	0	68.855	100
P_KWMTBOMO05541		tr|C7AQP4|C7AQP4_BOMMO	Calcium-transporting ATPase OS=Bombyx mori OX=7091 PE=2 SV=1	0	99.301	100		sp|Q7PPA5|ATC1_ANOGA	Calcium-transporting ATPase sarcoplasmic/endoplasmic reticulum type OS=Anopheles gambiae OX=7165 GN=SERCA PE=3 SV=5	0	89.279	99.6008
P_KWMTBOMO05564		tr|Q2F6A6|Q2F6A6_BOMMO	Elongation factor Tu OS=Bombyx mori OX=7091 PE=2 SV=1	0	100	100		sp|P49411|EFTU_HUMAN	Elongation factor Tu, mitochondrial OS=Homo sapiens OX=9606 GN=TUFM PE=1 SV=2	0	65.672	86.4516
P_KWMTBOMO05566		tr|Q2F5M1|Q2F5M1_BOMMO	GTP-binding nuclear protein OS=Bombyx mori OX=7091 GN=692970 PE=2 SV=1	1.62e-162	100	100		sp|Q9VZ23|RAN_DROME	GTP-binding nuclear protein Ran OS=Drosophila melanogaster OX=7227 GN=Ran PE=1 SV=1	2.67e-147	91.429	98.5915
P_KWMTBOMO05612		tr|H9JB77|H9JB77_BOMMO	SAM_MT_RSMB_NOP domain-containing protein OS=Bombyx mori OX=7091 GN=101741314 PE=3 SV=1	0	99.874	100		sp|Q922K7|NOP2_MOUSE	Probable 28S rRNA (cytosine-C(5))-methyltransferase OS=Mus musculus OX=10090 GN=Nop2 PE=1 SV=1	0	53.565	72.6928
P_KWMTBOMO05687		tr|A8R081|A8R081_BOMMO	Bombyx homolog of P-element somatic inhibitor OS=Bombyx mori OX=7091 GN=BmPSI PE=2 SV=1	1.37e-12	23.754	27.5222		sp|Q00341|VIGLN_HUMAN	Vigilin OS=Homo sapiens OX=9606 GN=HDLBP PE=1 SV=2	0	49.197	100
P_KWMTBOMO05723		tr|Q5UAM7|Q5UAM7_BOMMO	Ribosomal protein S15A OS=Bombyx mori OX=7091 GN=RpS15A PE=2 SV=1	5.26e-94	100	100		sp|Q6XIM8|RS15A_DROYA	40S ribosomal protein S15a OS=Drosophila yakuba OX=7245 GN=RpS15Aa PE=2 SV=3	3.84e-87	93.077	100
P_KWMTBOMO05741		tr|A1E129|A1E129_BOMMO	Kinesin-like protein OS=Bombyx mori OX=7091 PE=3 SV=2	0	99.17	100		sp|P17210|KINH_DROME	Kinesin heavy chain OS=Drosophila melanogaster OX=7227 GN=Khc PE=1 SV=2	0	74.871	100
P_KWMTBOMO05975		tr|H9J059|H9J059_BOMMO	Tr-type G domain-containing protein OS=Bombyx mori OX=7091 PE=4 SV=1	0	100	100		sp|Q5R8Q7|GTPB1_PONAB	GTP-binding protein 1 (Fragment) OS=Pongo abelii OX=9601 GN=GTPBP1 PE=2 SV=2	2.41e-105	74.641	75.7246
P_KWMTBOMO05979		tr|Q5UAT0|Q5UAT0_BOMMO	Ribosomal protein L10 OS=Bombyx mori OX=7091 GN=RpL10 PE=2 SV=1	7.89e-166	100	100		sp|O96647|RL10_BOMMA	60S ribosomal protein L10 OS=Bombyx mandarina OX=7092 GN=RpL10 PE=2 SV=1	2.91e-164	99.543	100
P_KWMTBOMO05987		tr|A0FDQ5|A0FDQ5_BOMMO	Dolichyl-diphosphooligosaccharide--protein glycosyltransferase 48 kDa subunit OS=Bombyx mori OX=7091 PE=2 SV=1	0	99.541	100		sp|Q24319|OST48_DROME	Dolichyl-diphosphooligosaccharide--protein glycosyltransferase 48 kDa subunit OS=Drosophila melanogaster OX=7227 GN=Ost48 PE=2 SV=2	0	65.707	95.6422
P_KWMTBOMO06082		tr|H9IWS5|H9IWS5_BOMMO	Uncharacterized protein OS=Bombyx mori OX=7091 GN=101739385 PE=4 SV=1	0	100	100		--	--	--	--	--
P_KWMTBOMO06231		tr|H9IX18|H9IX18_BOMMO	RuvB-like helicase OS=Bombyx mori OX=7091 PE=3 SV=1	1.12e-166	98.765	65.1475		sp|Q9DE27|RUVB2_XENLA	RuvB-like 2 OS=Xenopus laevis OX=8355 GN=ruvbl2 PE=2 SV=1	0	81.501	100
P_KWMTBOMO06480		sp|Q5UAS1|RL18_BOMMO	60S ribosomal protein L18 OS=Bombyx mori OX=7091 GN=RpL18 PE=2 SV=1	1.41e-132	100	100		sp|Q5UAS1|RL18_BOMMO	60S ribosomal protein L18 OS=Bombyx mori OX=7091 GN=RpL18 PE=2 SV=1	9.16e-132	100	100
P_KWMTBOMO06632		tr|H9JQ89|H9JQ89_BOMMO	Nucleoprotein TPR OS=Bombyx mori OX=7091 PE=3 SV=1	0	87.867	58.4199		sp|A1Z8P9|TPR_DROME	Nucleoprotein TPR OS=Drosophila melanogaster OX=7227 GN=Mtor PE=1 SV=1	0	31.858	100
P_KWMTBOMO06770		tr|H9JRG2|H9JRG2_BOMMO	Carboxylic ester hydrolase OS=Bombyx mori OX=7091 PE=3 SV=1	0	100	89.4934		sp|P35502|ESTF_MYZPE	Esterase FE4 OS=Myzus persicae OX=13164 PE=1 SV=1	8.36e-86	35.577	97.561
P_KWMTBOMO06974		tr|Q5UAQ1|Q5UAQ1_BOMMO	Ribosomal protein L36A OS=Bombyx mori OX=7091 GN=RpL36A PE=2 SV=1	2.04e-71	100	100		sp|Q9NB33|RL44_OCHTR	60S ribosomal protein L44 OS=Ochlerotatus triseriatus OX=7162 GN=RpL44 PE=3 SV=3	5.04e-61	85.577	100
P_KWMTBOMO07274		tr|A0A4P9D450|A0A4P9D450_BOMMO	Piwi OS=Bombyx mori OX=7091 PE=2 SV=1	0	100	100		sp|A8D8P8|SIWI_BOMMO	Piwi-like protein Siwi OS=Bombyx mori OX=7091 GN=Siwi PE=1 SV=1	0	100	100
P_KWMTBOMO07294		tr|H9JM82|H9JM82_BOMMO	Uncharacterized protein OS=Bombyx mori OX=7091 GN=101739074 PE=4 SV=1	0	99.634	100		sp|O94826|TOM70_HUMAN	Mitochondrial import receptor subunit TOM70 OS=Homo sapiens OX=9606 GN=TOMM70 PE=1 SV=1	1.26e-176	44.718	100
P_KWMTBOMO07323		tr|Q2F6C4|Q2F6C4_BOMMO	T-complex protein 1 subunit delta OS=Bombyx mori OX=7091 PE=2 SV=1	0	99.814	100		sp|Q9NB32|TCPD_OCHTR	T-complex protein 1 subunit delta OS=Ochlerotatus triseriatus OX=7162 PE=2 SV=1	0	69.088	100
P_KWMTBOMO07373		tr|H9J6N5|H9J6N5_BOMMO	Uncharacterized protein OS=Bombyx mori OX=7091 PE=4 SV=1	4.18e-97	100	100		sp|Q9U1N0|HRP65_CHITE	Hrp65 protein OS=Chironomus tentans OX=7153 GN=HRP65 PE=1 SV=1	6.32e-24	60.227	61.9718
P_KWMTBOMO07374		tr|Q0ZAL3|Q0ZAL3_BOMMO	Splicing factor proline-and glutamine-rich OS=Bombyx mori OX=7091 GN=SFPQ PE=2 SV=1	0	99.802	100		sp|Q9GRW7|NONA_DROVI	Protein no-on-transient A OS=Drosophila virilis OX=7244 GN=nonA PE=2 SV=1	5.73e-114	61.132	52.4752
P_KWMTBOMO07589		tr|A0A023SG69|A0A023SG69_BOMMO	Coatomer subunit beta OS=Bombyx mori OX=7091 GN=beta-COP PE=4 SV=1	0	93.705	100		sp|Q5ZIA5|COPB_CHICK	Coatomer subunit beta OS=Gallus gallus OX=9031 GN=COPB1 PE=2 SV=1	0	57.39	100
P_KWMTBOMO07688		tr|Q5UAP3|Q5UAP3_BOMMO	40S ribosomal protein S2 OS=Bombyx mori OX=7091 GN=RpS2 PE=2 SV=1	0	100	100		sp|P31009|RS2_DROME	40S ribosomal protein S2 OS=Drosophila melanogaster OX=7227 GN=RpS2 PE=1 SV=2	4.18e-144	90.278	82.7586
P_KWMTBOMO07772		tr|Q5UAN4|Q5UAN4_BOMMO	Ribosomal protein S10 OS=Bombyx mori OX=7091 GN=RpS10 PE=2 SV=1	4.4e-118	100	100		sp|Q962R9|RS10_SPOFR	40S ribosomal protein S10 OS=Spodoptera frugiperda OX=7108 GN=RpS10 PE=2 SV=1	1.19e-105	92.453	99.375
P_KWMTBOMO07857		tr|Q5R1P5|Q5R1P5_BOMMO	Heat shock protein hsp21.4 OS=Bombyx mori OX=7091 GN=Hsp21.4 PE=2 SV=1	4.58e-139	100	100		sp|Q00649|HSPB1_CHICK	Heat shock protein beta-1 OS=Gallus gallus OX=9031 GN=HSPB1 PE=2 SV=1	5.62e-19	47.727	47.0588
P_KWMTBOMO07874		tr|H9IVB4|H9IVB4_BOMMO	Glutaminyl-tRNA synthetase OS=Bombyx mori OX=7091 PE=3 SV=1	0	99.788	60.5128		sp|Q9Y105|SYQ_DROME	Probable glutamine--tRNA ligase OS=Drosophila melanogaster OX=7227 GN=GlnRS PE=2 SV=1	0	68.408	100
P_KWMTBOMO07930		tr|Q1HQ48|Q1HQ48_BOMMO	Mitochondrial single-stranded DNA-binding protein OS=Bombyx mori OX=7091 PE=2 SV=1	1.39e-108	99.324	100		sp|P54622|SSBP_DROME	Single-stranded DNA-binding protein, mitochondrial OS=Drosophila melanogaster OX=7227 GN=mtSSB PE=1 SV=2	2.56e-50	64.545	74.3243
P_KWMTBOMO08041		tr|H9IV46|H9IV46_BOMMO	Rab proteins geranylgeranyltransferase component A OS=Bombyx mori OX=7091 GN=101740100 PE=3 SV=1	0	100	100		sp|Q9V8W3|RABEP_DROME	Rab proteins geranylgeranyltransferase component A OS=Drosophila melanogaster OX=7227 GN=Rep PE=1 SV=1	6.05e-105	36.542	97.3231
P_KWMTBOMO08100		tr|Q5UAR8|Q5UAR8_BOMMO	60S ribosomal protein L21 OS=Bombyx mori OX=7091 GN=RpL21 PE=2 SV=1	1.42e-115	100	100		sp|P46778|RL21_HUMAN	60S ribosomal protein L21 OS=Homo sapiens OX=9606 GN=RPL21 PE=1 SV=2	2.69e-77	66.875	100
P_KWMTBOMO08106		tr|H9IUY0|H9IUY0_BOMMO	Clathrin light chain OS=Bombyx mori OX=7091 PE=3 SV=1	2.92e-149	98.095	100		sp|Q9VWA1|CLC_DROME	Clathrin light chain OS=Drosophila melanogaster OX=7227 GN=Clc PE=2 SV=1	5.76e-40	46.948	100
P_KWMTBOMO08193		tr|H9JIX2|H9JIX2_BOMMO	Uncharacterized protein OS=Bombyx mori OX=7091 PE=3 SV=1	2.11e-91	98.571	100		sp|O95831|AIFM1_HUMAN	Apoptosis-inducing factor 1, mitochondrial OS=Homo sapiens OX=9606 GN=AIFM1 PE=1 SV=1	4.02e-30	42.958	100
P_KWMTBOMO08310		tr|Q1HQB9|Q1HQB9_BOMMO	Nucleosome assembly protein isoform 1 OS=Bombyx mori OX=7091 PE=2 SV=1	0	100	100		sp|Q5U2Z3|NP1L4_RAT	Nucleosome assembly protein 1-like 4 OS=Rattus norvegicus OX=10116 GN=Nap1l4 PE=1 SV=1	4.23e-97	49.462	94.1772
P_KWMTBOMO08323		tr|H9JI91|H9JI91_BOMMO	Uncharacterized protein OS=Bombyx mori OX=7091 PE=4 SV=1	0	99.643	98.2456		sp|Q5R4J9|NAA15_PONAB	N-alpha-acetyltransferase 15, NatA auxiliary subunit OS=Pongo abelii OX=9601 GN=NAA15 PE=2 SV=1	4.44e-47	41.985	91.9298
P_KWMTBOMO08399		tr|Q5UAR0|Q5UAR0_BOMMO	60S ribosomal protein L28 OS=Bombyx mori OX=7091 GN=RpL28 PE=2 SV=1	1.61e-98	100	100		sp|Q962T2|RL28_SPOFR	60S ribosomal protein L28 OS=Spodoptera frugiperda OX=7108 GN=RpL28 PE=2 SV=1	7.15e-81	92.857	90.6475
P_KWMTBOMO08440		tr|Q5UAM6|Q5UAM6_BOMMO	Ribosomal protein S16 OS=Bombyx mori OX=7091 GN=RpS16 PE=2 SV=1	8.57e-109	100	100		sp|Q95V31|RS16_SPOFR	40S ribosomal protein S16 OS=Spodoptera frugiperda OX=7108 GN=RpS16 PE=2 SV=1	1.88e-104	98.013	100
P_KWMTBOMO08607		tr|H9JEL8|H9JEL8_BOMMO	Uncharacterized protein OS=Bombyx mori OX=7091 PE=4 SV=1	2.44e-142	98.974	54.3175		sp|Q5M9F1|RBM34_RAT	RNA-binding protein 34 OS=Rattus norvegicus OX=10116 GN=Rbm34 PE=1 SV=1	8.14e-07	26.087	64.0669
P_KWMTBOMO08642		tr|F8UN44|F8UN44_BOMMO	Heat shock protein 70-3 OS=Bombyx mori OX=7091 PE=2 SV=1	0	100	100		sp|P29844|BIP_DROME	Endoplasmic reticulum chaperone BiP OS=Drosophila melanogaster OX=7227 GN=Hsc70-3 PE=1 SV=2	0	89.708	99.3893
P_KWMTBOMO08648		tr|H9JEK1|H9JEK1_BOMMO	Uncharacterized protein OS=Bombyx mori OX=7091 PE=3 SV=1	0	91.125	100		sp|P13395|SPTCA_DROME	Spectrin alpha chain OS=Drosophila melanogaster OX=7227 GN=alpha-Spec PE=1 SV=2	0	76.124	100
P_KWMTBOMO08666		tr|Q66SV4|Q66SV4_BOMMO	40S ribosomal protein S23 OS=Bombyx mori OX=7091 GN=S23 PE=2 SV=1	5.48e-103	100	100		sp|Q6EV23|RS23_PAPDA	40S ribosomal protein S23 OS=Papilio dardanus OX=77259 GN=RpS23 PE=2 SV=1	6.27e-101	97.902	100
P_KWMTBOMO08776		sp|Q1HPW4|EIF3I_BOMMO	Eukaryotic translation initiation factor 3 subunit I OS=Bombyx mori OX=7091 PE=2 SV=1	0	100	100		sp|Q1HPW4|EIF3I_BOMMO	Eukaryotic translation initiation factor 3 subunit I OS=Bombyx mori OX=7091 PE=2 SV=1	0	100	100
P_KWMTBOMO08820		tr|Q1HPI5|Q1HPI5_BOMMO	Nucleoside diphosphate kinase OS=Bombyx mori OX=7091 PE=2 SV=1	4.74e-113	100	100		sp|P08879|NDKA_DROME	Nucleoside diphosphate kinase OS=Drosophila melanogaster OX=7227 GN=awd PE=1 SV=3	5.17e-94	81.046	100
P_KWMTBOMO08893		tr|H9JE77|H9JE77_BOMMO	Succinate--CoA ligase [GDP-forming] subunit beta, mitochondrial OS=Bombyx mori OX=7091 GN=101740061 PE=3 SV=1	0	100	100		sp|Q96I99|SUCB2_HUMAN	Succinate--CoA ligase [GDP-forming] subunit beta, mitochondrial OS=Homo sapiens OX=9606 GN=SUCLG2 PE=1 SV=2	1.11e-159	59.231	92.6366
P_KWMTBOMO08956		tr|H9JDY1|H9JDY1_BOMMO	M20_dimer domain-containing protein OS=Bombyx mori OX=7091 PE=3 SV=1	0	99.784	96.8685		sp|Q3ZC84|CNDP2_BOVIN	Cytosolic non-specific dipeptidase OS=Bos taurus OX=9913 GN=CNDP2 PE=2 SV=1	0	58.65	98.9562
P_KWMTBOMO09054		tr|Q1HQ47|Q1HQ47_BOMMO	Isocitrate dehydrogenase [NADP] OS=Bombyx mori OX=7091 GN=100101164 PE=2 SV=1	0	100	100		sp|P33198|IDHP_PIG	Isocitrate dehydrogenase [NADP], mitochondrial (Fragment) OS=Sus scrofa OX=9823 GN=IDH2 PE=1 SV=1	0	71.325	95.4023
P_KWMTBOMO09055		tr|H9JDA5|H9JDA5_BOMMO	Proton-translocating NAD(P)(+) transhydrogenase OS=Bombyx mori OX=7091 PE=3 SV=1	0	93.082	100		sp|P11024|NNTM_BOVIN	NAD(P) transhydrogenase, mitochondrial OS=Bos taurus OX=9913 GN=NNT PE=1 SV=3	0	59.925	100
P_KWMTBOMO09230		tr|H9J1M5|H9J1M5_BOMMO	Uncharacterized protein OS=Bombyx mori OX=7091 PE=3 SV=1	3.45e-75	100	100		sp|P08570|RLA1_DROME	60S acidic ribosomal protein P1 OS=Drosophila melanogaster OX=7227 GN=RpLP1 PE=1 SV=2	1.01e-42	81.25	100
P_KWMTBOMO09300		tr|Q5UAU1|Q5UAU1_BOMMO	60S acidic ribosomal protein P0 OS=Bombyx mori OX=7091 GN=RpP0 PE=1 SV=1	0	100	100		sp|Q9U3U0|RLA0_CERCA	60S acidic ribosomal protein P0 OS=Ceratitis capitata OX=7213 GN=RpLP0 PE=3 SV=1	1.73e-177	81.388	100
P_KWMTBOMO09415		tr|H9JTB0|H9JTB0_BOMMO	RNA helicase OS=Bombyx mori OX=7091 GN=101741115 PE=4 SV=1	0	99.765	100		sp|Q27268|DX39B_DROME	ATP-dependent RNA helicase WM6 OS=Drosophila melanogaster OX=7227 GN=Hel25E PE=1 SV=1	0	88.498	100
P_KWMTBOMO09442		tr|Q5UAT5|Q5UAT5_BOMMO	60S ribosomal protein L6 OS=Bombyx mori OX=7091 GN=RpL6 PE=2 SV=1	0	99.634	100		sp|Q6QMZ4|RL6_CHILA	60S ribosomal protein L6 OS=Chinchilla lanigera OX=34839 GN=RPL6 PE=2 SV=3	4.24e-65	48.8	91.5751
P_KWMTBOMO09542		tr|H9JU13|H9JU13_BOMMO	Eukaryotic translation initiation factor 3 subunit A OS=Bombyx mori OX=7091 PE=3 SV=1	0	96.154	90.339		sp|Q173M7|EIF3A_AEDAE	Eukaryotic translation initiation factor 3 subunit A OS=Aedes aegypti OX=7159 GN=eIF3-S10 PE=3 SV=1	0	66.215	68.7288
P_KWMTBOMO09621		tr|H9JTI9|H9JTI9_BOMMO	Eukaryotic translation initiation factor 3 subunit C OS=Bombyx mori OX=7091 GN=eIF3c PE=3 SV=1	0	100	100		sp|Q0ZB76|EIF3C_BOMMO	Eukaryotic translation initiation factor 3 subunit C OS=Bombyx mori OX=7091 GN=eIF3-S8 PE=2 SV=1	0	99.886	100
P_KWMTBOMO09747		tr|B7XFU6|B7XFU6_BOMMO	Clathrin heavy chain OS=Bombyx mori OX=7091 GN=100233163 PE=2 SV=1	0	99.941	100		sp|P29742|CLH_DROME	Clathrin heavy chain OS=Drosophila melanogaster OX=7227 GN=Chc PE=1 SV=1	0	85.196	100
P_KWMTBOMO09808		tr|Q2F6C3|Q2F6C3_BOMMO	Chaperonin subunit 6a zeta OS=Bombyx mori OX=7091 GN=692796 PE=2 SV=1	0	100	100		sp|P80317|TCPZ_MOUSE	T-complex protein 1 subunit zeta OS=Mus musculus OX=10090 GN=Cct6a PE=1 SV=3	0	72.505	100
P_KWMTBOMO10248		tr|H9JCR4|H9JCR4_BOMMO	40S ribosomal protein SA OS=Bombyx mori OX=7091 PE=3 SV=1	0	100	100		sp|Q5UAP4|RSSA_BOMMO	40S ribosomal protein SA OS=Bombyx mori OX=7091 PE=2 SV=1	0	99.673	100
P_KWMTBOMO10358		tr|H9JX26|H9JX26_BOMMO	DUF4781 domain-containing protein OS=Bombyx mori OX=7091 PE=4 SV=1	0	79.827	48.3287		--	--	--	--	--
P_KWMTBOMO10661		tr|H9JFF9|H9JFF9_BOMMO	Uncharacterized protein OS=Bombyx mori OX=7091 PE=4 SV=1	0	99.829	69.8451		sp|B4J9K1|BOP1_DROGR	Ribosome biogenesis protein BOP1 homolog OS=Drosophila grimshawi OX=7222 GN=GH22027 PE=3 SV=1	0	57.698	76.6389
P_KWMTBOMO10780		tr|H9JFX9|H9JFX9_BOMMO	Uncharacterized protein OS=Bombyx mori OX=7091 PE=4 SV=1	0	90.138	43.8191		sp|Q9V3P6|PSMD1_DROME	26S proteasome non-ATPase regulatory subunit 1 OS=Drosophila melanogaster OX=7227 GN=Rpn2 PE=1 SV=1	0	71.218	100
P_KWMTBOMO11045		tr|H9JRL1|H9JRL1_BOMMO	Uncharacterized protein OS=Bombyx mori OX=7091 PE=3 SV=1	0	28.363	91.5196		sp|Q00963|SPTCB_DROME	Spectrin beta chain OS=Drosophila melanogaster OX=7227 GN=beta-Spec PE=1 SV=2	0	73.055	100
P_KWMTBOMO11061		tr|Q2F5N1|Q2F5N1_BOMMO	Prohibitin OS=Bombyx mori OX=7091 GN=693108 PE=2 SV=1	0	100	100		sp|Q5XIH7|PHB2_RAT	Prohibitin-2 OS=Rattus norvegicus OX=10116 GN=Phb2 PE=1 SV=1	5.66e-158	72.667	100
P_KWMTBOMO11083		tr|Q9BPS3|Q9BPS3_BOMMO	Elongation factor 1 gamma OS=Bombyx mori OX=7091 GN=ef-1g PE=2 SV=1	0	100	100		sp|P12261|EF1G_ARTSA	Elongation factor 1-gamma OS=Artemia salina OX=85549 PE=1 SV=3	0	65.741	100
P_KWMTBOMO11096		tr|A1E9B3|A1E9B3_BOMMO	H(+)-transporting two-sector ATPase OS=Bombyx mori OX=7091 PE=2 SV=1	0	99.676	100		sp|P31400|VATA_MANSE	V-type proton ATPase catalytic subunit A OS=Manduca sexta OX=7130 GN=VHAA PE=2 SV=1	0	98.217	100
P_KWMTBOMO11202		tr|H9JT03|H9JT03_BOMMO	F-actin-capping protein subunit alpha OS=Bombyx mori OX=7091 GN=101738938 PE=3 SV=1	0	100	100		sp|Q9W2N0|CAPZA_DROME	F-actin-capping protein subunit alpha OS=Drosophila melanogaster OX=7227 GN=cpa PE=2 SV=1	1.31e-147	68.44	97.9167
P_KWMTBOMO11255		tr|Q5UAN5|Q5UAN5_BOMMO	40S ribosomal protein S9 OS=Bombyx mori OX=7091 GN=RpS9 PE=2 SV=1	5.62e-140	100	100		sp|B4PEU8|RS9_DROYA	40S ribosomal protein S9 OS=Drosophila yakuba OX=7245 GN=RpS9 PE=2 SV=1	2.83e-117	89.231	100
P_KWMTBOMO11336		tr|H9IX66|H9IX66_BOMMO	Threonyl-tRNA synthetase OS=Bombyx mori OX=7091 PE=3 SV=1	0	98.151	98.5975		sp|Q3ZBV8|SYTC_BOVIN	Threonine--tRNA ligase 1, cytoplasmic OS=Bos taurus OX=9913 GN=TARS1 PE=2 SV=1	0	69.371	100
P_KWMTBOMO11448		tr|H9IXE5|H9IXE5_BOMMO	Uncharacterized protein OS=Bombyx mori OX=7091 GN=733057 PE=4 SV=1	1.36e-160	100	100		sp|P53994|RAB2A_MOUSE	Ras-related protein Rab-2A OS=Mus musculus OX=10090 GN=Rab2a PE=1 SV=1	2.2e-141	90.654	100
P_KWMTBOMO11590		tr|H9J3D2|H9J3D2_BOMMO	Ku domain-containing protein OS=Bombyx mori OX=7091 GN=101736121 PE=4 SV=1	0	98.077	80.6897		sp|O93257|XRCC6_CHICK	X-ray repair cross-complementing protein 5 OS=Gallus gallus OX=9031 GN=XRCC6 PE=2 SV=1	5.59e-42	26.126	95.6897
P_KWMTBOMO11666		tr|Q2V0H5|Q2V0H5_BOMMO	Vesicle-fusing ATPase OS=Bombyx mori OX=7091 GN=ter94 PE=2 SV=1	0	100	100		sp|Q7KN62|TERA_DROME	Transitional endoplasmic reticulum ATPase TER94 OS=Drosophila melanogaster OX=7227 GN=TER94 PE=1 SV=1	0	88.025	100
P_KWMTBOMO11678		tr|Q5UAS7|Q5UAS7_BOMMO	60S ribosomal protein L12 OS=Bombyx mori OX=7091 GN=RpL12 PE=2 SV=1	1.46e-118	100	100		sp|P23358|RL12_RAT	60S ribosomal protein L12 OS=Rattus norvegicus OX=10116 GN=Rpl12 PE=2 SV=1	3.08e-96	81.25	97.561
P_KWMTBOMO11780		tr|H9JY65|H9JY65_BOMMO	Complex I-30kD OS=Bombyx mori OX=7091 GN=101738954 PE=3 SV=1	0	100	100		sp|Q9VZU4|NDUS3_DROME	NADH dehydrogenase [ubiquinone] iron-sulfur protein 3, mitochondrial OS=Drosophila melanogaster OX=7227 GN=ND-30 PE=1 SV=1	1.81e-130	74.468	88.6792
P_KWMTBOMO11985		tr|Q5UAT4|Q5UAT4_BOMMO	Ribosomal protein L7 OS=Bombyx mori OX=7091 GN=RpL7 PE=2 SV=1	0	100	100		sp|P32100|RL7_DROME	60S ribosomal protein L7 OS=Drosophila melanogaster OX=7227 GN=RpL7 PE=1 SV=2	4.63e-117	66.667	92.5651
P_KWMTBOMO12018		tr|Q5UAN7|Q5UAN7_BOMMO	40S ribosomal protein S7 OS=Bombyx mori OX=7091 GN=RpS7 PE=2 SV=1	1.24e-137	99.474	100		sp|P48155|RS7_MANSE	40S ribosomal protein S7 OS=Manduca sexta OX=7130 GN=RpS7 PE=2 SV=1	1.42e-134	97.368	100
P_KWMTBOMO12037		tr|H9J470|H9J470_BOMMO	DEK_C domain-containing protein OS=Bombyx mori OX=7091 PE=4 SV=1	0	91.221	94.1532		sp|Q6AXS3|DEK_RAT	Protein DEK OS=Rattus norvegicus OX=10116 GN=Dek PE=1 SV=1	5.05e-20	47.368	19.1532
P_KWMTBOMO12166		tr|H9JWZ4|H9JWZ4_BOMMO	NADH dehydrogenase [ubiquinone] 1 alpha subcomplex subunit 10, mitochondrial OS=Bombyx mori OX=7091 GN=101745480 PE=3 SV=1	0	100	100		sp|P91929|NDUAA_DROME	NADH dehydrogenase [ubiquinone] 1 alpha subcomplex subunit 10, mitochondrial OS=Drosophila melanogaster OX=7227 GN=ND-42 PE=1 SV=2	1.8e-134	49.485	97.4874
P_KWMTBOMO12264		tr|H9JHZ0|H9JHZ0_BOMMO	CYTOSOL_AP domain-containing protein OS=Bombyx mori OX=7091 PE=3 SV=1	0	93.99	79.5411		sp|Q5R7G6|PEPL1_PONAB	Probable aminopeptidase NPEPL1 OS=Pongo abelii OX=9601 GN=NPEPL1 PE=3 SV=2	0	54.981	99.8088
P_KWMTBOMO12389		tr|H9JSC6|H9JSC6_BOMMO	Coatomer subunit epsilon OS=Bombyx mori OX=7091 PE=3 SV=1	0	100	100		sp|Q5ZIK9|COPE_CHICK	Coatomer subunit epsilon OS=Gallus gallus OX=9031 GN=COPE PE=2 SV=1	6.42e-96	48.475	97.6821
P_KWMTBOMO12560		tr|A0A1Q1NKL1|A0A1Q1NKL1_BOMMO	Tyrosine--tRNA ligase OS=Bombyx mori OX=7091 PE=2 SV=1	0	99.809	100		sp|Q5ZJ08|SYYC_CHICK	Tyrosine--tRNA ligase, cytoplasmic OS=Gallus gallus OX=9031 GN=YARS1 PE=2 SV=1	0	71.374	100
P_KWMTBOMO12602		tr|H9IWB5|H9IWB5_BOMMO	Uncharacterized protein OS=Bombyx mori OX=7091 PE=3 SV=1	0	95.142	67.5882		sp|P37276|DYHC_DROME	Dynein heavy chain, cytoplasmic OS=Drosophila melanogaster OX=7227 GN=Dhc64C PE=2 SV=2	0	79.96	99.7778
P_KWMTBOMO12659		tr|H9IVX5|H9IVX5_BOMMO	T-complex protein 1 subunit gamma OS=Bombyx mori OX=7091 GN=101744569 PE=3 SV=1	0	100	100		sp|P48605|TCPG_DROME	T-complex protein 1 subunit gamma OS=Drosophila melanogaster OX=7227 GN=CCT3 PE=2 SV=2	0	81.041	99.6296
P_KWMTBOMO12667		tr|Q1HPM7|Q1HPM7_BOMMO	Mitochondrial aldehyde dehydrogenase OS=Bombyx mori OX=7091 PE=2 SV=1	0	97.291	47.2281		sp|P81178|ALDH2_MESAU	Aldehyde dehydrogenase, mitochondrial OS=Mesocricetus auratus OX=10036 GN=ALDH2 PE=1 SV=1	0	70	45.8422
P_KWMTBOMO12844		tr|H9U396|H9U396_BOMMO	Endoplasmin-like protein OS=Bombyx mori OX=7091 PE=2 SV=1	0	100	100		sp|Q66HD0|ENPL_RAT	Endoplasmin OS=Rattus norvegicus OX=10116 GN=Hsp90b1 PE=1 SV=2	0	59.264	93.9506
P_KWMTBOMO12895		tr|Q19AA9|Q19AA9_BOMMO	Transport protein Sec61 alpha subunit OS=Bombyx mori OX=7091 GN=733068 PE=2 SV=1	0	100	100		sp|Q9JLR1|S61A2_MOUSE	Protein transport protein Sec61 subunit alpha isoform 2 OS=Mus musculus OX=10090 GN=Sec61a2 PE=2 SV=3	0	91.597	100
P_KWMTBOMO13226		tr|H6VTQ9|H6VTQ9_BOMMO	DnaJ-19 OS=Bombyx mori OX=7091 PE=2 SV=1	0	100	99.2978		sp|Q9UGP8|SEC63_HUMAN	Translocation protein SEC63 homolog OS=Homo sapiens OX=9606 GN=SEC63 PE=1 SV=2	0	44.537	100
P_KWMTBOMO13235		tr|H9JKC3|H9JKC3_BOMMO	Transket_pyr domain-containing protein OS=Bombyx mori OX=7091 PE=3 SV=1	0	83.749	100		sp|Q60HE2|ODO1_MACFA	2-oxoglutarate dehydrogenase, mitochondrial OS=Macaca fascicularis OX=9541 GN=OGDH PE=2 SV=1	0	62.761	98.6288
P_KWMTBOMO13293		tr|E9JEI6|E9JEI6_BOMMO	Poly [ADP-ribose] polymerase (Fragment) OS=Bombyx mori OX=7091 PE=2 SV=1	0	99.894	94.5		sp|Q11208|PARP_SARPE	Poly [ADP-ribose] polymerase OS=Sarcophaga peregrina OX=7386 PE=1 SV=1	0	48.473	100
P_KWMTBOMO13369		tr|Q2F5S0|Q2F5S0_BOMMO	rRNA processing protein Ebp2 OS=Bombyx mori OX=7091 PE=2 SV=1	0	99.032	100		sp|Q9V9Z9|EBP2_DROME	Probable rRNA-processing protein EBP2 homolog OS=Drosophila melanogaster OX=7227 GN=CG1542 PE=2 SV=1	9.55e-77	50.16	100
P_KWMTBOMO13370		tr|H9JN38|H9JN38_BOMMO	Signal recognition particle subunit SRP72 OS=Bombyx mori OX=7091 PE=3 SV=1	0	100	66.306		sp|O76094|SRP72_HUMAN	Signal recognition particle subunit SRP72 OS=Homo sapiens OX=9606 GN=SRP72 PE=1 SV=3	7.11e-121	37.721	96.2906
P_KWMTBOMO13455		sp|Q5UAP0|RS4_BOMMO	40S ribosomal protein S4 OS=Bombyx mori OX=7091 GN=RpS4 PE=2 SV=1	0	100	100		sp|Q5UAP0|RS4_BOMMO	40S ribosomal protein S4 OS=Bombyx mori OX=7091 GN=RpS4 PE=2 SV=1	0	100	100
P_KWMTBOMO13567		tr|H9JN68|H9JN68_BOMMO	Uncharacterized protein OS=Bombyx mori OX=7091 PE=4 SV=1	0	100	61.1833		--	--	--	--	--
P_KWMTBOMO13569		tr|Q5UAR3|Q5UAR3_BOMMO	Ribosomal protein L26 OS=Bombyx mori OX=7091 GN=RpL26 PE=2 SV=1	7.52e-72	100	100		sp|Q95WA0|RL26_LITLI	60S ribosomal protein L26 OS=Littorina littorea OX=31216 GN=RPL26 PE=2 SV=1	1.9e-51	80.392	100
P_KWMTBOMO13960		tr|Q5UAN0|Q5UAN0_BOMMO	40S ribosomal protein S13 OS=Bombyx mori OX=7091 GN=RpS13 PE=2 SV=1	8.93e-110	100	100		sp|Q962R6|RS13_SPOFR	40S ribosomal protein S13 OS=Spodoptera frugiperda OX=7108 GN=RpS13 PE=2 SV=3	1.63e-108	99.338	100
P_KWMTBOMO14041		tr|Q2F5J1|Q2F5J1_BOMMO	26S proteasome non-ATPase regulatory subunit 13 OS=Bombyx mori OX=7091 PE=2 SV=1	0	100	100		sp|B0BN93|PSD13_RAT	26S proteasome non-ATPase regulatory subunit 13 OS=Rattus norvegicus OX=10116 GN=Psmd13 PE=1 SV=1	1.26e-102	46.921	88.5714
P_KWMTBOMO14080		tr|H9JNW4|H9JNW4_BOMMO	Uncharacterized protein OS=Bombyx mori OX=7091 PE=4 SV=1	0	100	98.8015		sp|P35502|ESTF_MYZPE	Esterase FE4 OS=Myzus persicae OX=13164 PE=1 SV=1	4.32e-69	33.142	39.1011
P_KWMTBOMO14157		tr|H9JNS6|H9JNS6_BOMMO	Coatomer subunit gamma OS=Bombyx mori OX=7091 GN=692402 PE=3 SV=1	0	99.768	100		sp|Q29AE5|COPG_DROPS	Coatomer subunit gamma OS=Drosophila pseudoobscura pseudoobscura OX=46245 GN=gammaCop PE=3 SV=1	0	58.75	100
P_KWMTBOMO14420		tr|H9IS77|H9IS77_BOMMO	Uncharacterized protein OS=Bombyx mori OX=7091 GN=101744691 PE=4 SV=1	0	99.786	99.7861		sp|Q9BUJ2|HNRL1_HUMAN	Heterogeneous nuclear ribonucleoprotein U-like protein 1 OS=Homo sapiens OX=9606 GN=HNRNPUL1 PE=1 SV=2	7.54e-52	41.87	26.3102
P_KWMTBOMO14440		tr|Q1HPP5|Q1HPP5_BOMMO	Actin-depolymerizing factor 1 OS=Bombyx mori OX=7091 PE=2 SV=1	1.7e-108	100	100		sp|P45594|CADF_DROME	Cofilin/actin-depolymerizing factor homolog OS=Drosophila melanogaster OX=7227 GN=tsr PE=1 SV=1	2.22e-100	92.568	100
P_KWMTBOMO14479		tr|H9IS48|H9IS48_BOMMO	Uncharacterized protein OS=Bombyx mori OX=7091 GN=101742289 PE=3 SV=1	7.91e-100	100	100		sp|Q8I1F4|FBRL_DROER	rRNA 2'-O-methyltransferase fibrillarin OS=Drosophila erecta OX=7220 GN=Fib PE=3 SV=1	2.11e-41	82.278	50
P_KWMTBOMO14530		tr|Q2F5R7|Q2F5R7_BOMMO	Eukaryotic peptide chain release factor subunit 1 OS=Bombyx mori OX=7091 PE=2 SV=1	0	99.314	100		sp|Q9VPH7|ERF1_DROME	Eukaryotic peptide chain release factor subunit 1 OS=Drosophila melanogaster OX=7227 GN=eRF1 PE=1 SV=2	0	93.822	100
P_KWMTBOMO14549		tr|I6XKQ0|I6XKQ0_BOMMO	Heat shock protein 70-5 OS=Bombyx mori OX=7091 PE=2 SV=1	0	99.565	100		sp|P29845|HSP7E_DROME	Heat shock 70 kDa protein cognate 5 OS=Drosophila melanogaster OX=7227 GN=Hsc70-5 PE=1 SV=2	0	81.86	93.4783
P_KWMTBOMO14732		tr|Q86PG2|Q86PG2_BOMMO	ADP/ATP translocase OS=Bombyx mori OX=7091 GN=ANT PE=2 SV=1	0	100	100		sp|Q26365|ADT_DROME	ADP,ATP carrier protein OS=Drosophila melanogaster OX=7227 GN=sesB PE=2 SV=4	0	87.458	98.3333
P_KWMTBOMO14752		tr|H9J2U6|H9J2U6_BOMMO	PUA domain-containing protein OS=Bombyx mori OX=7091 GN=101744752 PE=3 SV=1	0	100	100		sp|O44081|DKC1_DROME	H/ACA ribonucleoprotein complex subunit 4 OS=Drosophila melanogaster OX=7227 GN=Nop60B PE=1 SV=1	0	76.69	91.4712
P_KWMTBOMO14804		tr|H9JRQ1|H9JRQ1_BOMMO	Programmed cell death protein 4 OS=Bombyx mori OX=7091 GN=101743674 PE=3 SV=1	0	100	59.1422		sp|Q98TX3|PDCD4_CHICK	Programmed cell death protein 4 OS=Gallus gallus OX=9031 GN=PDCD4 PE=2 SV=1	3.96e-92	43.371	100
P_KWMTBOMO14887		tr|H9JRM2|H9JRM2_BOMMO	T-complex protein 1 subunit eta OS=Bombyx mori OX=7091 PE=3 SV=1	0	99.631	100		sp|Q5ZJK8|TCPH_CHICK	T-complex protein 1 subunit eta OS=Gallus gallus OX=9031 GN=CCT7 PE=1 SV=1	0	69.376	97.6015
P_KWMTBOMO14984		tr|H9J5J2|H9J5J2_BOMMO	AAA domain-containing protein OS=Bombyx mori OX=7091 PE=3 SV=1	0	100	100		sp|O42587|PR6AA_XENLA	26S proteasome regulatory subunit 6A-A OS=Xenopus laevis OX=8355 GN=psmc3-a PE=2 SV=2	0	88.124	98.3645
P_KWMTBOMO15060		tr|H9J5R2|H9J5R2_BOMMO	Protein transport protein SEC23 OS=Bombyx mori OX=7091 PE=3 SV=1	0	100	100		sp|Q01405|SC23A_MOUSE	Protein transport protein Sec23A OS=Mus musculus OX=10090 GN=Sec23a PE=1 SV=2	0	74.583	100
P_KWMTBOMO15114		tr|Q5UAL8|Q5UAL8_BOMMO	40S ribosomal protein S25 OS=Bombyx mori OX=7091 GN=RpS25 PE=2 SV=1	7.13e-83	100	100		sp|Q962Q5|RS25_SPOFR	40S ribosomal protein S25 OS=Spodoptera frugiperda OX=7108 GN=RpS25 PE=3 SV=1	1.98e-81	99.16	100
P_KWMTBOMO15123		tr|H9J5W8|H9J5W8_BOMMO	AAA domain-containing protein OS=Bombyx mori OX=7091 PE=3 SV=2	0	99.241	90.389		sp|P48601|PRS4_DROME	26S proteasome regulatory subunit 4 OS=Drosophila melanogaster OX=7227 GN=Rpt2 PE=1 SV=2	0	96.811	100
P_KWMTBOMO15159		tr|H9J5Z1|H9J5Z1_BOMMO	Uncharacterized protein OS=Bombyx mori OX=7091 PE=4 SV=1	0	97.685	99.3428		sp|Q99PL5|RRBP1_MOUSE	Ribosome-binding protein 1 OS=Mus musculus OX=10090 GN=Rrbp1 PE=1 SV=2	3.36e-17	27.524	67.2508
P_KWMTBOMO15359		tr|H9J6H4|H9J6H4_BOMMO	Glutamyl-tRNA synthetase OS=Bombyx mori OX=7091 PE=3 SV=1	0	100	97.0994		sp|P28668|SYEP_DROME	Bifunctional glutamate/proline--tRNA ligase OS=Drosophila melanogaster OX=7227 GN=GluProRS PE=1 SV=2	0	60.526	99.7238
P_KWMTBOMO15361		tr|O16143|O16143_BOMMO	Rab1 protein OS=Bombyx mori OX=7091 GN=rabB PE=2 SV=1	5.31e-153	100	100		sp|Q05974|RAB1A_LYMST	Ras-related protein Rab-1A OS=Lymnaea stagnalis OX=6523 GN=RAB1A PE=2 SV=1	4.74e-124	81.188	100
P_KWMTBOMO15584		tr|D2Y4R2|D2Y4R2_BOMMO	Coatomer subunit alpha OS=Bombyx mori OX=7091 GN=COPA PE=2 SV=1	0	99.729	99.7297		sp|P53621|COPA_HUMAN	Coatomer subunit alpha OS=Homo sapiens OX=9606 GN=COPA PE=1 SV=2	0	78.729	97.8378
P_KWMTBOMO15715		tr|H9IYH6|H9IYH6_BOMMO	Uncharacterized protein OS=Bombyx mori OX=7091 PE=4 SV=1	0	86.272	98.3282		--	--	--	--	--
P_KWMTBOMO15758		tr|B3VBE3|B3VBE3_BOMMO	Vacuolar proton pump subunit B OS=Bombyx mori OX=7091 PE=2 SV=1	0	99.278	88.2166		sp|P31401|VATB_MANSE	V-type proton ATPase subunit B OS=Manduca sexta OX=7130 GN=VHA55 PE=2 SV=1	0	97.112	88.2166
P_KWMTBOMO16040		tr|H9J4W7|H9J4W7_BOMMO	Uncharacterized protein OS=Bombyx mori OX=7091 PE=3 SV=1	0	100	77.5641		sp|P42669|PURA_MOUSE	Transcriptional activator protein Pur-alpha OS=Mus musculus OX=10090 GN=Pura PE=1 SV=1	1.27e-77	50.213	75.3205
P_KWMTBOMO16309		tr|H9JW60|H9JW60_BOMMO	UBX domain-containing protein OS=Bombyx mori OX=7091 PE=4 SV=1	1.01e-106	92.353	43.5897		sp|Q3SZC4|NSF1C_BOVIN	NSFL1 cofactor p47 OS=Bos taurus OX=9913 GN=NSFL1C PE=2 SV=1	6.48e-85	40.852	100
P_KWMTBOMO16357		tr|Q5UAN3|Q5UAN3_BOMMO	40S ribosomal protein S11 OS=Bombyx mori OX=7091 GN=RpS11-1 PE=2 SV=1	6e-114	100	100		sp|P62280|RS11_HUMAN	40S ribosomal protein S11 OS=Homo sapiens OX=9606 GN=RPS11 PE=1 SV=3	4.63e-88	77.848	100
