# Supplementary material for: New insights into the proteins interacting with the promoters of silkworm fibroin genes
Source: Research Square preprint supplement (doi:10.21203/rs.3.rs-400247/v1), 2021-04-12
Supplement: Supplementary file 3 [file 77bcd02bad78d45176b4f9b3.xlsx]

## Sheet: unique PIPs of fibH at M4
Name	Bombyx-mori	Subject ID	Description	e-value	identity(%)	coverage(%)	Metazoa	Subject ID	Description	e-value	identity(%)	coverage(%)
P_KWMTBOMO00366		tr|H9ITD6|H9ITD6_BOMMO	Uncharacterized protein OS=Bombyx mori OX=7091 PE=4 SV=1	0	99.775	83.8041		sp|O42254|IF2B1_CHICK	Insulin-like growth factor 2 mRNA-binding protein 1 OS=Gallus gallus OX=9031 GN=IGF2BP1 PE=1 SV=1	7.53e-128	44.578	93.7853
P_KWMTBOMO00437		tr|H9IU13|H9IU13_BOMMO	PHB domain-containing protein OS=Bombyx mori OX=7091 PE=3 SV=1	0	100	98.8263		sp|O61491|FLOT1_DROME	Flotillin-1 OS=Drosophila melanogaster OX=7227 GN=Flo1 PE=2 SV=1	0	83.059	99.7653
P_KWMTBOMO00687		tr|H9J134|H9J134_BOMMO	Nucleolar GTP-binding protein 1 OS=Bombyx mori OX=7091 PE=4 SV=1	0	93.029	64.5963		sp|Q9V411|NOG1_DROME	Nucleolar GTP-binding protein 1 OS=Drosophila melanogaster OX=7227 GN=Non1 PE=2 SV=1	0	68.666	100
P_KWMTBOMO00786		tr|H9JJK3|H9JJK3_BOMMO	HIT domain-containing protein OS=Bombyx mori OX=7091 GN=693069 PE=4 SV=1	6.16e-93	100	100		sp|P62958|HINT1_BOVIN	Histidine triad nucleotide-binding protein 1 OS=Bos taurus OX=9913 GN=HINT1 PE=1 SV=2	1.81e-62	68.75	100
P_KWMTBOMO00881		tr|D4QF47|D4QF47_BOMMO	Ced-6 protein OS=Bombyx mori OX=7091 GN=ced-6 PE=2 SV=1	0	100	100		sp|Q7JUY7|CED6_DROME	PTB domain-containing adapter protein ced-6 OS=Drosophila melanogaster OX=7227 GN=ced-6 PE=1 SV=1	3.82e-84	39.463	94.347
P_KWMTBOMO01030		tr|H9JCZ3|H9JCZ3_BOMMO	Vitellogenin domain-containing protein OS=Bombyx mori OX=7091 PE=4 SV=1	0	88.516	89.4919		sp|Q865F1|MTP_PIG	Microsomal triglyceride transfer protein large subunit OS=Sus scrofa OX=9823 GN=MTTP PE=2 SV=1	4.29e-24	22.451	100
P_KWMTBOMO01320		tr|H9JH84|H9JH84_BOMMO	Uncharacterized protein OS=Bombyx mori OX=7091 PE=3 SV=1	3.35e-146	100	100		sp|P46222|RL11_DROME	60S ribosomal protein L11 OS=Drosophila melanogaster OX=7227 GN=RpL11 PE=1 SV=2	4.44e-121	91.011	91.2821
P_KWMTBOMO01790		tr|H9J907|H9J907_BOMMO	TPR_REGION domain-containing protein OS=Bombyx mori OX=7091 PE=4 SV=1	0	99.758	78.0511		sp|Q9VGU5|TTC14_DROME	Tetratricopeptide repeat protein 14 homolog OS=Drosophila melanogaster OX=7227 GN=CG6621 PE=1 SV=2	1.2e-82	48.657	31.6935
P_KWMTBOMO01927		sp|P21894|SYAC_BOMMO	Alanine--tRNA ligase, cytoplasmic OS=Bombyx mori OX=7091 PE=1 SV=1	0	99.276	100		sp|P21894|SYAC_BOMMO	Alanine--tRNA ligase, cytoplasmic OS=Bombyx mori OX=7091 PE=1 SV=1	0	99.276	100
P_KWMTBOMO02059		tr|Q5UAM4|Q5UAM4_BOMMO	40S ribosomal protein S18 OS=Bombyx mori OX=7091 GN=RpS18 PE=2 SV=1	1.29e-111	100	100		sp|Q962R1|RS18_SPOFR	40S ribosomal protein S18 OS=Spodoptera frugiperda OX=7108 GN=RpS18 PE=2 SV=1	1.23e-110	99.342	100
P_KWMTBOMO02211		tr|E3VQ36|E3VQ36_BOMMO	Non-specific serine/threonine protein kinase OS=Bombyx mori OX=7091 GN=100529202 PE=2 SV=1	0	100	96.635		sp|M3TYT0|ROCK2_PIG	Rho-associated protein kinase 2 OS=Sus scrofa OX=9823 GN=ROCK2 PE=1 SV=1	0	44.876	99.9268
P_KWMTBOMO02432		tr|H9JVD5|H9JVD5_BOMMO	Dolichyl-diphosphooligosaccharide--protein glycosyltransferase subunit 2 OS=Bombyx mori OX=7091 PE=3 SV=1	0	100	100		sp|Q3SZI6|RPN2_BOVIN	Dolichyl-diphosphooligosaccharide--protein glycosyltransferase subunit 2 OS=Bos taurus OX=9913 GN=RPN2 PE=2 SV=1	1.44e-58	28.155	99.3569
P_KWMTBOMO02748		tr|H9J2I1|H9J2I1_BOMMO	TLC domain-containing protein OS=Bombyx mori OX=7091 GN=101745731 PE=3 SV=1	0	100	100		sp|Q6DED0|TR1L1_XENLA	Translocating chain-associated membrane protein 1-like 1 OS=Xenopus laevis OX=8355 GN=tram1l1 PE=2 SV=1	1.09e-74	35.979	100
P_KWMTBOMO02894		tr|H9J2B5|H9J2B5_BOMMO	Uncharacterized protein OS=Bombyx mori OX=7091 GN=101743323 PE=3 SV=1	0	98.864	98.0501		sp|Q03427|LAMC_DROME	Lamin-C OS=Drosophila melanogaster OX=7227 GN=LamC PE=1 SV=2	2.44e-127	61.491	89.6936
P_KWMTBOMO02994		tr|H9J281|H9J281_BOMMO	DNA photolyase OS=Bombyx mori OX=7091 PE=3 SV=1	0	100	96.0452		sp|Q28811|PHR_POTTR	Deoxyribodipyrimidine photo-lyase OS=Potorous tridactylus OX=9310 GN=PHR PE=2 SV=1	0	59.205	90.0188
P_KWMTBOMO03173		tr|Q1HPV7|Q1HPV7_BOMMO	Histone H2A OS=Bombyx mori OX=7091 GN=h2a.z PE=2 SV=1	1.2e-88	100	100		sp|Q6Y237|H2AV_PAGMA	Histone H2A.V OS=Pagrus major OX=143350 GN=h2az2 PE=2 SV=3	3.37e-81	97.561	95.3488
P_KWMTBOMO03601		tr|S5RN30|S5RN30_BOMMO	Farnesoic acid O-methyltransferase OS=Bombyx mori OX=7091 GN=FaMeT6-1 PE=2 SV=1	6.39e-110	100	100		sp|Q66S13|NATT4_THANI	Natterin-4 OS=Thalassophryne nattereri OX=289382 PE=2 SV=1	5.91e-07	31.061	89.7959
P_KWMTBOMO03748		tr|Q2F645|Q2F645_BOMMO	Transketolase OS=Bombyx mori OX=7091 PE=2 SV=1	0	100	100		sp|Q9D4D4|TKTL2_MOUSE	Transketolase-like protein 2 OS=Mus musculus OX=10090 GN=Tktl2 PE=1 SV=1	0	62.153	98.5531
P_KWMTBOMO03860		tr|H9JKX7|H9JKX7_BOMMO	Uncharacterized protein OS=Bombyx mori OX=7091 PE=3 SV=1	0	97.603	100		sp|P26686|SRR55_DROME	Serine-arginine protein 55 OS=Drosophila melanogaster OX=7227 GN=B52 PE=1 SV=4	6.44e-97	77.487	66.7832
P_KWMTBOMO04504		tr|H9J7F7|H9J7F7_BOMMO	Zinc-hook domain-containing protein OS=Bombyx mori OX=7091 PE=3 SV=1	2.04e-100	100	98		sp|Q9W252|RAD50_DROME	DNA repair protein RAD50 OS=Drosophila melanogaster OX=7227 GN=rad50 PE=2 SV=4	9.46e-37	43.791	100
P_KWMTBOMO04505		tr|H9J7F7|H9J7F7_BOMMO	Zinc-hook domain-containing protein OS=Bombyx mori OX=7091 PE=3 SV=1	0	99.3	85.5432		sp|Q9W252|RAD50_DROME	DNA repair protein RAD50 OS=Drosophila melanogaster OX=7227 GN=rad50 PE=2 SV=4	1.59e-155	31.037	100
P_KWMTBOMO04691		tr|Q5TLD1|Q5TLD1_BOMMO	Replication protein A small subunit OS=Bombyx mori OX=7091 GN=BmRPA3 PE=2 SV=1	2.98e-98	100	100		--	--	--	--	--
P_KWMTBOMO04742		tr|Q5UAR2|Q5UAR2_BOMMO	60S ribosomal protein L27 OS=Bombyx mori OX=7091 GN=RpL27 PE=2 SV=1	1.18e-95	100	100		sp|P61354|RL27_RAT	60S ribosomal protein L27 OS=Rattus norvegicus OX=10116 GN=Rpl27 PE=2 SV=2	2.09e-64	71.324	100
P_KWMTBOMO05068		tr|Q5UAR4|Q5UAR4_BOMMO	Ribosomal protein L24 OS=Bombyx mori OX=7091 GN=RpL24 PE=2 SV=1	2.43e-111	100	100		sp|Q6F444|RL24_PLUXY	60S ribosomal protein L24 OS=Plutella xylostella OX=51655 GN=RpL24 PE=2 SV=1	1.72e-90	95.484	100
P_KWMTBOMO05179		tr|H9JSH7|H9JSH7_BOMMO	Uncharacterized protein OS=Bombyx mori OX=7091 PE=3 SV=1	0	97.051	100		sp|P10079|FBP1_STRPU	Fibropellin-1 OS=Strongylocentrotus purpuratus OX=7668 GN=EGF1 PE=1 SV=2	2.23e-127	42.751	15.754
P_KWMTBOMO05675		tr|Q5UAR5|Q5UAR5_BOMMO	Ribosomal protein L23A OS=Bombyx mori OX=7091 GN=RpL23A PE=2 SV=1	0	100	100		sp|P62752|RL23A_RAT	60S ribosomal protein L23a OS=Rattus norvegicus OX=10116 GN=Rpl23a PE=2 SV=1	8.65e-62	76.19	35.7955
P_KWMTBOMO05680		tr|H9JBF1|H9JBF1_BOMMO	VWFC domain-containing protein OS=Bombyx mori OX=7091 PE=4 SV=1	0	97.473	98.9241		--	--	--	--	--
P_KWMTBOMO05728		tr|H9JBC1|H9JBC1_BOMMO	Aspartate carbamoyltransferase OS=Bombyx mori OX=7091 PE=3 SV=1	0	98.881	100		sp|P05990|PYR1_DROME	CAD protein OS=Drosophila melanogaster OX=7227 GN=r PE=1 SV=3	0	68.238	100
P_KWMTBOMO06056		tr|H9J011|H9J011_BOMMO	DUF1907 domain-containing protein OS=Bombyx mori OX=7091 GN=101745847 PE=4 SV=1	0	100	100		sp|Q91V76|CK054_MOUSE	Ester hydrolase C11orf54 homolog OS=Mus musculus OX=10090 PE=1 SV=1	1.39e-89	44.72	98.4709
P_KWMTBOMO06082		tr|H9IWS5|H9IWS5_BOMMO	Uncharacterized protein OS=Bombyx mori OX=7091 GN=101739385 PE=4 SV=1	0	100	100		--	--	--	--	--
P_KWMTBOMO06231		tr|H9IX18|H9IX18_BOMMO	RuvB-like helicase OS=Bombyx mori OX=7091 PE=3 SV=1	1.12e-166	98.765	65.1475		sp|Q9DE27|RUVB2_XENLA	RuvB-like 2 OS=Xenopus laevis OX=8355 GN=ruvbl2 PE=2 SV=1	0	81.501	100
P_KWMTBOMO06482		tr|H9JQQ1|H9JQQ1_BOMMO	Uncharacterized protein OS=Bombyx mori OX=7091 PE=3 SV=1	0	98.577	100		sp|P25823|TUD_DROME	Maternal protein tudor OS=Drosophila melanogaster OX=7227 GN=tud PE=1 SV=2	5.7e-67	30.841	33.5423
P_KWMTBOMO06632		tr|H9JQ89|H9JQ89_BOMMO	Nucleoprotein TPR OS=Bombyx mori OX=7091 PE=3 SV=1	0	87.867	58.4199		sp|A1Z8P9|TPR_DROME	Nucleoprotein TPR OS=Drosophila melanogaster OX=7227 GN=Mtor PE=1 SV=1	0	31.858	100
P_KWMTBOMO06731		tr|H9JQE1|H9JQE1_BOMMO	Histone deacetylase OS=Bombyx mori OX=7091 PE=3 SV=1	0	91.686	89.648		sp|Q94517|HDAC1_DROME	Histone deacetylase HDAC1 OS=Drosophila melanogaster OX=7227 GN=HDAC1 PE=1 SV=2	0	92.634	92.7536
P_KWMTBOMO06770		tr|H9JRG2|H9JRG2_BOMMO	Carboxylic ester hydrolase OS=Bombyx mori OX=7091 PE=3 SV=1	0	100	89.4934		sp|P35502|ESTF_MYZPE	Esterase FE4 OS=Myzus persicae OX=13164 PE=1 SV=1	8.36e-86	35.577	97.561
P_KWMTBOMO06787		tr|H9JRF6|H9JRF6_BOMMO	SUMO-activating enzyme subunit OS=Bombyx mori OX=7091 PE=3 SV=1	0	96.875	100		sp|Q28GH3|SAE2_XENTR	SUMO-activating enzyme subunit 2 OS=Xenopus tropicalis OX=8364 GN=uba2 PE=2 SV=1	0	55	95.3947
P_KWMTBOMO06803		tr|H9JR86|H9JR86_BOMMO	CP-type G domain-containing protein OS=Bombyx mori OX=7091 GN=101742911 PE=4 SV=1	0	100	100		sp|Q9W590|LSG1_DROME	Large subunit GTPase 1 homolog OS=Drosophila melanogaster OX=7227 GN=Ns3 PE=1 SV=1	5.32e-148	39.605	100
P_KWMTBOMO07076		tr|H9JLN4|H9JLN4_BOMMO	Uncharacterized protein OS=Bombyx mori OX=7091 PE=4 SV=1	0	99.76	80.0384		sp|Q28EW0|TM87A_XENTR	Transmembrane protein 87A OS=Xenopus tropicalis OX=8364 GN=tmem87a PE=2 SV=1	5.77e-124	39.051	100
P_KWMTBOMO07274		tr|A0A4P9D450|A0A4P9D450_BOMMO	Piwi OS=Bombyx mori OX=7091 PE=2 SV=1	0	100	100		sp|A8D8P8|SIWI_BOMMO	Piwi-like protein Siwi OS=Bombyx mori OX=7091 GN=Siwi PE=1 SV=1	0	100	100
P_KWMTBOMO07294		tr|H9JM82|H9JM82_BOMMO	Uncharacterized protein OS=Bombyx mori OX=7091 GN=101739074 PE=4 SV=1	0	99.634	100		sp|O94826|TOM70_HUMAN	Mitochondrial import receptor subunit TOM70 OS=Homo sapiens OX=9606 GN=TOMM70 PE=1 SV=1	1.26e-176	44.718	100
P_KWMTBOMO07373		tr|H9J6N5|H9J6N5_BOMMO	Uncharacterized protein OS=Bombyx mori OX=7091 PE=4 SV=1	4.18e-97	100	100		sp|Q9U1N0|HRP65_CHITE	Hrp65 protein OS=Chironomus tentans OX=7153 GN=HRP65 PE=1 SV=1	6.32e-24	60.227	61.9718
P_KWMTBOMO07380		--	--	--	--	--		--	--	--	--	--
P_KWMTBOMO07780		tr|H9IUH3|H9IUH3_BOMMO	Eukaryotic translation initiation factor 3 subunit M OS=Bombyx mori OX=7091 GN=101737255 PE=3 SV=1	0	100	100		sp|Q17D30|EIF3M_AEDAE	Eukaryotic translation initiation factor 3 subunit M OS=Aedes aegypti OX=7159 GN=AAEL004347 PE=3 SV=1	0	72.798	100
P_KWMTBOMO08044		tr|H9IV44|H9IV44_BOMMO	DNA-(apurinic or apyrimidinic site) endonuclease OS=Bombyx mori OX=7091 GN=101739740 PE=3 SV=1	0	100	100		sp|P27864|RRP1_DROME	Recombination repair protein 1 OS=Drosophila melanogaster OX=7227 GN=Rrp1 PE=1 SV=2	6.85e-131	44.487	83.2278
P_KWMTBOMO08193		tr|H9JIX2|H9JIX2_BOMMO	Uncharacterized protein OS=Bombyx mori OX=7091 PE=3 SV=1	2.11e-91	98.571	100		sp|O95831|AIFM1_HUMAN	Apoptosis-inducing factor 1, mitochondrial OS=Homo sapiens OX=9606 GN=AIFM1 PE=1 SV=1	4.02e-30	42.958	100
P_KWMTBOMO08194		tr|H9JIX2|H9JIX2_BOMMO	Uncharacterized protein OS=Bombyx mori OX=7091 PE=3 SV=1	1.35e-72	66.522	52.1542		sp|Q9VQ79|AIFM1_DROME	Putative apoptosis-inducing factor 1, mitochondrial OS=Drosophila melanogaster OX=7227 GN=AIF PE=2 SV=2	5.12e-60	35.423	72.3356
P_KWMTBOMO08213		tr|H9JIW2|H9JIW2_BOMMO	Uncharacterized protein OS=Bombyx mori OX=7091 GN=101746972 PE=4 SV=1	0	100	100		sp|P51610|HCFC1_HUMAN	Host cell factor 1 OS=Homo sapiens OX=9606 GN=HCFC1 PE=1 SV=2	0	71.99	45.5847
P_KWMTBOMO08404		tr|H9JI59|H9JI59_BOMMO	RNA cytidine acetyltransferase OS=Bombyx mori OX=7091 PE=3 SV=1	0	96.934	100		sp|Q9W3C1|NAT10_DROME	RNA cytidine acetyltransferase OS=Drosophila melanogaster OX=7227 GN=l(1)G0020 PE=1 SV=2	0	60.513	99.1862
P_KWMTBOMO08652		tr|H9JDP0|H9JDP0_BOMMO	Diadenosine tetraphosphate synthetase OS=Bombyx mori OX=7091 PE=3 SV=1	0	100	100		sp|Q04451|SYG_BOMMO	Glycine--tRNA ligase OS=Bombyx mori OX=7091 PE=1 SV=2	0	99.118	100
P_KWMTBOMO08740		tr|H9JEF8|H9JEF8_BOMMO	UBR-type domain-containing protein OS=Bombyx mori OX=7091 PE=4 SV=1	0	99.168	55.8243		sp|Q9VLT5|POE_DROME	Protein purity of essence OS=Drosophila melanogaster OX=7227 GN=poe PE=1 SV=1	0	40.577	100
P_KWMTBOMO08865		tr|H9JE95|H9JE95_BOMMO	Protein arginine N-methyltransferase OS=Bombyx mori OX=7091 PE=3 SV=1	0	99.674	91.2202		sp|O14744|ANM5_HUMAN	Protein arginine N-methyltransferase 5 OS=Homo sapiens OX=9606 GN=PRMT5 PE=1 SV=4	7.08e-170	40.413	100
P_KWMTBOMO08889		tr|H9JE82|H9JE82_BOMMO	ZP domain-containing protein OS=Bombyx mori OX=7091 PE=4 SV=1	0	100	51.9886		sp|Q19053|CUT4_CAEEL	Cuticlin-4 OS=Caenorhabditis elegans OX=6239 GN=cut-4 PE=2 SV=2	2.15e-08	24	31.9602
P_KWMTBOMO08926		tr|Q9NGS0|Q9NGS0_BOMMO	Serpin-2 OS=Bombyx mori OX=7091 PE=2 SV=1	0	92.042	94.25		sp|Q5MGH0|SPI3_LONON	Serine protease inhibitor 3/4 (Fragment) OS=Lonomia obliqua OX=304329 PE=1 SV=1	3.16e-87	41.176	85
P_KWMTBOMO08983		tr|Q5UAT2|Q5UAT2_BOMMO	60S ribosomal protein L8 OS=Bombyx mori OX=7091 GN=RpL8 PE=2 SV=1	0	100	100		sp|Q95V39|RL8_SPOFR	60S ribosomal protein L8 OS=Spodoptera frugiperda OX=7108 GN=RpL8 PE=2 SV=1	0	100	100
P_KWMTBOMO09034		tr|H9JDJ7|H9JDJ7_BOMMO	RNA helicase OS=Bombyx mori OX=7091 PE=3 SV=1	0	96.038	74.2297		sp|P16381|DDX3L_MOUSE	Putative ATP-dependent RNA helicase Pl10 OS=Mus musculus OX=10090 GN=D1Pas1 PE=1 SV=1	0	56.444	94.5378
P_KWMTBOMO09057		tr|H9JDA6|H9JDA6_BOMMO	C2 domain-containing protein OS=Bombyx mori OX=7091 PE=4 SV=1	0	92	57.7157		sp|A0FGR8|ESYT2_HUMAN	Extended synaptotagmin-2 OS=Homo sapiens OX=9606 GN=ESYT2 PE=1 SV=1	1.37e-145	32.94	100
P_KWMTBOMO09300		tr|Q5UAU1|Q5UAU1_BOMMO	60S acidic ribosomal protein P0 OS=Bombyx mori OX=7091 GN=RpP0 PE=1 SV=1	0	100	100		sp|Q9U3U0|RLA0_CERCA	60S acidic ribosomal protein P0 OS=Ceratitis capitata OX=7213 GN=RpLP0 PE=3 SV=1	1.73e-177	81.388	100
P_KWMTBOMO09390		tr|H9JU84|H9JU84_BOMMO	Splicing factor, arginine/serine-rich 1 OS=Bombyx mori OX=7091 PE=3 SV=1	6.24e-155	100	100		sp|Q6NYA0|SRS1B_DANRE	Serine/arginine-rich splicing factor 1B OS=Danio rerio OX=7955 GN=srsf1b PE=2 SV=1	3.58e-87	71.939	91.1628
P_KWMTBOMO09591		tr|H9JTH6|H9JTH6_BOMMO	Uncharacterized protein OS=Bombyx mori OX=7091 PE=3 SV=1	9.34e-169	100	55.2752		sp|O61492|FLOT2_DROME	Flotillin-2 OS=Drosophila melanogaster OX=7227 GN=Flo2 PE=2 SV=3	0	76.923	95.4128
P_KWMTBOMO09980		tr|Q1HPT4|Q1HPT4_BOMMO	14-3-3 epsilon OS=Bombyx mori OX=7091 PE=2 SV=1	0	100	100		sp|P92177|1433E_DROME	14-3-3 protein epsilon OS=Drosophila melanogaster OX=7227 GN=14-3-3epsilon PE=1 SV=2	4.71e-163	84.906	100
P_KWMTBOMO10493		tr|H9JC69|H9JC69_BOMMO	Eukaryotic translation initiation factor 3 subunit B OS=Bombyx mori OX=7091 PE=3 SV=1	0	99.568	100		sp|Q1HDZ5|EIF3B_BOMMO	Eukaryotic translation initiation factor 3 subunit B OS=Bombyx mori OX=7091 GN=eIF3-S9 PE=2 SV=1	0	99.568	100
P_KWMTBOMO10509		tr|Q5UAR7|Q5UAR7_BOMMO	Ribosomal protein L22 OS=Bombyx mori OX=7091 GN=RpL22 PE=2 SV=1	1.07e-106	100	100		sp|P52819|RL22_CAEEL	60S ribosomal protein L22 OS=Caenorhabditis elegans OX=6239 GN=rpl-22 PE=1 SV=3	4.5e-38	49.254	91.1565
P_KWMTBOMO11045		tr|H9JRL1|H9JRL1_BOMMO	Uncharacterized protein OS=Bombyx mori OX=7091 PE=3 SV=1	0	28.363	91.5196		sp|Q00963|SPTCB_DROME	Spectrin beta chain OS=Drosophila melanogaster OX=7227 GN=beta-Spec PE=1 SV=2	0	73.055	100
P_KWMTBOMO11098		tr|H9JGC5|H9JGC5_BOMMO	RNA-binding motif protein 21 OS=Bombyx mori OX=7091 GN=101736670 PE=4 SV=1	0	100	100		sp|Q1JPD6|STPAP_BOVIN	Speckle targeted PIP5K1A-regulated poly(A) polymerase OS=Bos taurus OX=9913 GN=TUT1 PE=2 SV=1	3.32e-28	31.646	29.4045
P_KWMTBOMO11276		tr|H9IZS8|H9IZS8_BOMMO	MCM domain-containing protein OS=Bombyx mori OX=7091 GN=101746848 PE=3 SV=1	0	100	54.6535		sp|Q26454|MCM4_DROME	DNA replication licensing factor MCM4 OS=Drosophila melanogaster OX=7227 GN=dpa PE=1 SV=2	0	68.515	100
P_KWMTBOMO11517		tr|H9J3H3|H9J3H3_BOMMO	Uncharacterized protein OS=Bombyx mori OX=7091 PE=4 SV=1	0	96.387	98.8417		--	--	--	--	--
P_KWMTBOMO11519		tr|H9J3H4|H9J3H4_BOMMO	Uncharacterized protein OS=Bombyx mori OX=7091 PE=3 SV=1	0	68.669	56.4143		sp|Q86VQ3|TXND2_HUMAN	Thioredoxin domain-containing protein 2 OS=Homo sapiens OX=9606 GN=TXNDC2 PE=1 SV=4	2.1e-08	25.68	10.4846
P_KWMTBOMO11731		sp|Q1HPK6|EF2_BOMMO	Translation elongation factor 2 OS=Bombyx mori OX=7091 GN=tef2 PE=1 SV=1	0	100	100		sp|Q1HPK6|EF2_BOMMO	Translation elongation factor 2 OS=Bombyx mori OX=7091 GN=tef2 PE=1 SV=1	0	100	100
P_KWMTBOMO11868		tr|H9J4H5|H9J4H5_BOMMO	Uncharacterized protein OS=Bombyx mori OX=7091 PE=4 SV=1	0	97.426	40.396		sp|Q03001|DYST_HUMAN	Dystonin OS=Homo sapiens OX=9606 GN=DST PE=1 SV=4	1.78e-166	24.498	100
P_KWMTBOMO12037		tr|H9J470|H9J470_BOMMO	DEK_C domain-containing protein OS=Bombyx mori OX=7091 PE=4 SV=1	0	91.221	94.1532		sp|Q6AXS3|DEK_RAT	Protein DEK OS=Rattus norvegicus OX=10116 GN=Dek PE=1 SV=1	5.05e-20	47.368	19.1532
P_KWMTBOMO12057		tr|H9J463|H9J463_BOMMO	Eukaryotic translation initiation factor 2 subunit 1 OS=Bombyx mori OX=7091 GN=693063 PE=3 SV=1	0	100	100		sp|P41374|IF2A_DROME	Eukaryotic translation initiation factor 2 subunit 1 OS=Drosophila melanogaster OX=7227 GN=eIF2alpha PE=2 SV=1	2.35e-165	74.832	89.759
P_KWMTBOMO12165		tr|H9JWZ8|H9JWZ8_BOMMO	Glutathione synthase OS=Bombyx mori OX=7091 PE=3 SV=1	1.95e-169	99.565	52.9954		sp|P35668|GSHB_XENLA	Glutathione synthetase OS=Xenopus laevis OX=8355 GN=gss PE=2 SV=1	2.49e-108	43.564	93.0876
P_KWMTBOMO12205		tr|H9JXB6|H9JXB6_BOMMO	Uncharacterized protein OS=Bombyx mori OX=7091 PE=3 SV=1	0	99.788	99.7886		sp|Q5R1W7|ECHB_PANTR	Trifunctional enzyme subunit beta, mitochondrial OS=Pan troglodytes OX=9598 GN=HADHB PE=2 SV=1	0	66.667	96.4059
P_KWMTBOMO12264		tr|H9JHZ0|H9JHZ0_BOMMO	CYTOSOL_AP domain-containing protein OS=Bombyx mori OX=7091 PE=3 SV=1	0	93.99	79.5411		sp|Q5R7G6|PEPL1_PONAB	Probable aminopeptidase NPEPL1 OS=Pongo abelii OX=9601 GN=NPEPL1 PE=3 SV=2	0	54.981	99.8088
P_KWMTBOMO12350		tr|H9JS78|H9JS78_BOMMO	DZF domain-containing protein OS=Bombyx mori OX=7091 PE=4 SV=1	0	95.423	86.7063		sp|Q5REX3|ZFR_PONAB	Zinc finger RNA-binding protein OS=Pongo abelii OX=9601 GN=ZFR PE=2 SV=1	0	38.139	100
P_KWMTBOMO12497		tr|Q5UAN8|Q5UAN8_BOMMO	40S ribosomal protein S6 OS=Bombyx mori OX=7091 GN=RpS6 PE=2 SV=1	0	99.605	100		sp|Q94624|RS6_MANSE	40S ribosomal protein S6 OS=Manduca sexta OX=7130 GN=RpS6 PE=2 SV=1	2.56e-178	96.443	100
P_KWMTBOMO13567		tr|H9JN68|H9JN68_BOMMO	Uncharacterized protein OS=Bombyx mori OX=7091 PE=4 SV=1	0	100	61.1833		--	--	--	--	--
P_KWMTBOMO13721		tr|A1YM11|A1YM11_BOMMO	CCT-theta OS=Bombyx mori OX=7091 PE=2 SV=1	0	99.45	100		sp|Q6EE31|TCPQ_CHICK	T-complex protein 1 subunit theta OS=Gallus gallus OX=9031 GN=CCT8 PE=1 SV=3	0	63.72	99.633
P_KWMTBOMO13979		tr|Q2F646|Q2F646_BOMMO	Hairy cell leukemia protein 1 OS=Bombyx mori OX=7091 GN=693008 PE=2 SV=1	0	99.614	62.4096		sp|O95478|NSA2_HUMAN	Ribosome biogenesis protein NSA2 homolog OS=Homo sapiens OX=9606 GN=NSA2 PE=1 SV=1	9.59e-148	76.923	62.6506
P_KWMTBOMO13997		tr|Q6T9Z7|Q6T9Z7_BOMMO	Fibroinase OS=Bombyx mori OX=7091 GN=693031 PE=2 SV=1	0	100	100		sp|Q26636|CATL_SARPE	Cathepsin L OS=Sarcophaga peregrina OX=7386 PE=1 SV=1	6.18e-177	68.902	96.1877
P_KWMTBOMO14420		tr|H9IS77|H9IS77_BOMMO	Uncharacterized protein OS=Bombyx mori OX=7091 GN=101744691 PE=4 SV=1	0	99.786	99.7861		sp|Q9BUJ2|HNRL1_HUMAN	Heterogeneous nuclear ribonucleoprotein U-like protein 1 OS=Homo sapiens OX=9606 GN=HNRNPUL1 PE=1 SV=2	7.54e-52	41.87	26.3102
P_KWMTBOMO14568		tr|H9JH04|H9JH04_BOMMO	Importin N-terminal domain-containing protein OS=Bombyx mori OX=7091 PE=3 SV=1	4.68e-93	98.649	15.4489		sp|Q5ZLT0|XPO7_CHICK	Exportin-7 OS=Gallus gallus OX=9031 GN=XPO7 PE=2 SV=1	0	67.216	100
P_KWMTBOMO14752		tr|H9J2U6|H9J2U6_BOMMO	PUA domain-containing protein OS=Bombyx mori OX=7091 GN=101744752 PE=3 SV=1	0	100	100		sp|O44081|DKC1_DROME	H/ACA ribonucleoprotein complex subunit 4 OS=Drosophila melanogaster OX=7227 GN=Nop60B PE=1 SV=1	0	76.69	91.4712
P_KWMTBOMO14773		tr|H9J2R9|H9J2R9_BOMMO	Dynactin subunit 1 OS=Bombyx mori OX=7091 PE=3 SV=1	0	93.296	83.981		sp|P13496|DCTN1_DROME	Dynactin subunit 1 OS=Drosophila melanogaster OX=7227 GN=DCTN1-p150 PE=1 SV=2	0	41.095	100
P_KWMTBOMO14858		tr|H9JRJ9|H9JRJ9_BOMMO	Uncharacterized protein OS=Bombyx mori OX=7091 PE=4 SV=2	0	89.299	80.6381		sp|Q02645|HTS_DROME	Protein hu-li tai shao OS=Drosophila melanogaster OX=7227 GN=hts PE=1 SV=2	0	56.932	49.1661
P_KWMTBOMO15867		tr|H9JV01|H9JV01_BOMMO	Uncharacterized protein OS=Bombyx mori OX=7091 GN=101745818 PE=3 SV=1	0	100	100		sp|P48758|CBR1_MOUSE	Carbonyl reductase [NADPH] 1 OS=Mus musculus OX=10090 GN=Cbr1 PE=1 SV=3	2.7e-81	46.739	100
P_KWMTBOMO16130		tr|H9J4U4|H9J4U4_BOMMO	Calcium-transporting ATPase OS=Bombyx mori OX=7091 PE=3 SV=1	0	100	66.4439		sp|Q16720|AT2B3_HUMAN	Plasma membrane calcium-transporting ATPase 3 OS=Homo sapiens OX=9606 GN=ATP2B3 PE=1 SV=3	0	62.683	100
P_KWMTBOMO16524		tr|H9J7Z3|H9J7Z3_BOMMO	RRM domain-containing protein OS=Bombyx mori OX=7091 PE=3 SV=1	1e-90	76.064	100		sp|Q5R1W5|SRSF2_PANTR	Serine/arginine-rich splicing factor 2 OS=Pan troglodytes OX=9598 GN=SRSF2 PE=2 SV=3	1.89e-49	77.083	62.3377
P_KWMTBOMO16530		tr|H9J7S2|H9J7S2_BOMMO	Ribosome biogenesis regulatory protein OS=Bombyx mori OX=7091 GN=101743869 PE=3 SV=1	0	99.716	100		sp|Q9CYH6|RRS1_MOUSE	Ribosome biogenesis regulatory protein homolog OS=Mus musculus OX=10090 GN=Rrs1 PE=1 SV=1	1.15e-85	46.726	95.4545

## Sheet: unique PIPs of fibH at L5D5
Name	Bombyx-mori	Subject ID	Description	e-value	identity(%)	coverage(%)	Metazoa	Subject ID	Description	e-value	identity(%)	coverage(%)
P_KWMTBOMO00200		tr|Q8T0Z6|Q8T0Z6_BOMMO	E2 ubiquitin-conjugating enzyme OS=Bombyx mori OX=7091 GN=BmubcD4 PE=3 SV=1	8.54e-151	100	100		sp|P52486|UBCD4_DROME	Ubiquitin-conjugating enzyme E2-22 kDa OS=Drosophila melanogaster OX=7227 GN=Ubc4 PE=1 SV=2	3.69e-104	72.362	100
P_KWMTBOMO00265		tr|H9ITT4|H9ITT4_BOMMO	Transmembrane protein 208 OS=Bombyx mori OX=7091 PE=3 SV=1	2.59e-130	100	100		sp|Q6NYP0|TM208_DANRE	Transmembrane protein 208 OS=Danio rerio OX=7955 GN=tmem208 PE=2 SV=1	1.92e-39	44.444	92.0455
P_KWMTBOMO00303		tr|H9ITG0|H9ITG0_BOMMO	Rab-GAP TBC domain-containing protein OS=Bombyx mori OX=7091 PE=4 SV=1	0	98.655	99.8779		sp|Q9VYY9|EVI5_DROME	Ecotropic viral integration site 5 ortholog OS=Drosophila melanogaster OX=7227 GN=Evi5 PE=1 SV=3	0	59.115	93.7729
P_KWMTBOMO00362		tr|H9ITY0|H9ITY0_BOMMO	MSP domain-containing protein OS=Bombyx mori OX=7091 PE=3 SV=1	0	100	86.1702		sp|Q16943|VP33_APLCA	Vesicle-associated membrane protein/synaptobrevin-binding protein OS=Aplysia californica OX=6500 PE=2 SV=1	1.32e-48	36.232	97.8723
P_KWMTBOMO00373		tr|H9ITY4|H9ITY4_BOMMO	Aa_trans domain-containing protein OS=Bombyx mori OX=7091 GN=101746014 PE=4 SV=1	0	100	100		sp|Q9VT04|PATH_DROME	Proton-coupled amino acid transporter-like protein pathetic OS=Drosophila melanogaster OX=7227 GN=path PE=1 SV=1	6.88e-175	56.182	99.3534
P_KWMTBOMO00375		tr|H9ITY5|H9ITY5_BOMMO	Uncharacterized protein OS=Bombyx mori OX=7091 PE=3 SV=1	0	87.972	100		sp|Q9VSA3|ACADM_DROME	Probable medium-chain specific acyl-CoA dehydrogenase, mitochondrial OS=Drosophila melanogaster OX=7227 GN=CG12262 PE=2 SV=1	0	73.558	98.3452
P_KWMTBOMO00390		tr|H9ITC4|H9ITC4_BOMMO	Uncharacterized protein OS=Bombyx mori OX=7091 PE=4 SV=1	0	100	79.562		--	--	--	--	--
P_KWMTBOMO00427		tr|Q9NKX3|Q9NKX3_BOMMO	Coatomer subunit gamma OS=Bombyx mori OX=7091 GN=copg1 PE=2 SV=1	0	99.884	100		sp|Q8I0G5|COPG_DROME	Coatomer subunit gamma OS=Drosophila melanogaster OX=7227 GN=gammaCOP PE=2 SV=1	0	57.555	100
P_KWMTBOMO00473		tr|Q1HPX8|Q1HPX8_BOMMO	6-phosphogluconate dehydrogenase, decarboxylating OS=Bombyx mori OX=7091 PE=2 SV=1	0	100	100		sp|P52209|6PGD_HUMAN	6-phosphogluconate dehydrogenase, decarboxylating OS=Homo sapiens OX=9606 GN=PGD PE=1 SV=3	0	73.542	99.3789
P_KWMTBOMO00722		tr|A0A0D6A6H2|A0A0D6A6H2_BOMMO	Methionine--tRNA ligase, cytoplasmic OS=Bombyx mori OX=7091 GN=BmMRS PE=2 SV=1	0	100	100		sp|Q6PF21|SYMC_XENLA	Methionine--tRNA ligase, cytoplasmic OS=Xenopus laevis OX=8355 GN=mars1 PE=2 SV=1	0	46.816	89.4106
P_KWMTBOMO00794		tr|Q1HQ81|Q1HQ81_BOMMO	Nascent polypeptide associated complex protein alpha subunit OS=Bombyx mori OX=7091 PE=2 SV=1	1.91e-153	100	100		sp|Q94518|NACA_DROME	Nascent polypeptide-associated complex subunit alpha OS=Drosophila melanogaster OX=7227 GN=Nacalpha PE=1 SV=2	1.16e-78	65.455	100
P_KWMTBOMO00837		tr|H9JJI3|H9JJI3_BOMMO	Proteasome subunit beta OS=Bombyx mori OX=7091 PE=3 SV=1	0	100	97.3282		sp|P99026|PSB4_MOUSE	Proteasome subunit beta type-4 OS=Mus musculus OX=10090 GN=Psmb4 PE=1 SV=1	1.89e-88	49.799	95.0382
P_KWMTBOMO00838		tr|Q5UAR6|Q5UAR6_BOMMO	60S ribosomal protein L23 OS=Bombyx mori OX=7091 GN=RpL23 PE=2 SV=1	5.38e-99	100	100		sp|P48159|RL23_DROME	60S ribosomal protein L23 OS=Drosophila melanogaster OX=7227 GN=RpL23 PE=1 SV=2	5.37e-94	95	100
P_KWMTBOMO00860		tr|D2Y4R7|D2Y4R7_BOMMO	Coatomer subunit zeta OS=Bombyx mori OX=7091 GN=COPZ PE=2 SV=1	1.18e-132	100	100		sp|P35604|COPZ1_BOVIN	Coatomer subunit zeta-1 OS=Bos taurus OX=9913 GN=COPZ1 PE=1 SV=2	2.88e-83	62.921	100
P_KWMTBOMO00982		tr|H9IVS2|H9IVS2_BOMMO	Uncharacterized protein OS=Bombyx mori OX=7091 PE=4 SV=1	9.8e-180	100	48.7129		sp|Q9D0F3|LMAN1_MOUSE	Protein ERGIC-53 OS=Mus musculus OX=10090 GN=Lman1 PE=1 SV=1	1.46e-138	44.353	96.4356
P_KWMTBOMO01055		tr|Q5UAL7|Q5UAL7_BOMMO	40S ribosomal protein S26 OS=Bombyx mori OX=7091 GN=RpS26 PE=2 SV=1	1.02e-81	100	87.1212		sp|Q9GT45|RS26_ANOGA	40S ribosomal protein S26 OS=Anopheles gambiae OX=7165 GN=RpS26 PE=3 SV=2	5.07e-67	84.348	87.1212
P_KWMTBOMO01072		tr|H9JD17|H9JD17_BOMMO	Uncharacterized protein OS=Bombyx mori OX=7091 PE=4 SV=1	0	99.688	40.0249		sp|Q9W3N6|USO1_DROME	General vesicular transport factor p115 OS=Drosophila melanogaster OX=7227 GN=p115 PE=1 SV=2	0	50.619	100
P_KWMTBOMO01076		tr|Q2F635|Q2F635_BOMMO	Adenosine kinase OS=Bombyx mori OX=7091 GN=692855 PE=2 SV=1	0	100	100		sp|Q64640|ADK_RAT	Adenosine kinase OS=Rattus norvegicus OX=10116 GN=Adk PE=1 SV=3	1.17e-116	48.949	95.4155
P_KWMTBOMO01129		tr|H9JIS9|H9JIS9_BOMMO	F-actin-capping protein subunit beta OS=Bombyx mori OX=7091 PE=3 SV=1	0	100	100		sp|Q5XI32|CAPZB_RAT	F-actin-capping protein subunit beta OS=Rattus norvegicus OX=10116 GN=Capzb PE=1 SV=1	7.35e-168	81.481	98.1818
P_KWMTBOMO01182		tr|Q1EPM0|Q1EPM0_BOMMO	Glyceraldehyde-3-phosphate dehydrogenase OS=Bombyx mori OX=7091 GN=BmGAPDH PE=2 SV=1	0	100	100		sp|P07487|G3P2_DROME	Glyceraldehyde-3-phosphate dehydrogenase 2 OS=Drosophila melanogaster OX=7227 GN=Gapdh2 PE=1 SV=2	0	84.036	100
P_KWMTBOMO01315		tr|Q1HPJ9|Q1HPJ9_BOMMO	V-type proton ATPase subunit H OS=Bombyx mori OX=7091 PE=2 SV=1	0	99.789	100		sp|Q9U5N0|VATH_MANSE	V-type proton ATPase subunit H OS=Manduca sexta OX=7130 PE=2 SV=1	0	96.421	100
P_KWMTBOMO01380		tr|H9JHI5|H9JHI5_BOMMO	Lipoyl-binding domain-containing protein OS=Bombyx mori OX=7091 PE=4 SV=1	5.01e-120	98.78	92.6554		sp|Q19749|ODP2_CAEEL	Dihydrolipoyllysine-residue acetyltransferase component of pyruvate dehydrogenase complex, mitochondrial OS=Caenorhabditis elegans OX=6239 GN=dlat-1 PE=1 SV=1	2.61e-52	72.414	65.5367
P_KWMTBOMO01423		tr|H9JHG0|H9JHG0_BOMMO	NADH-ubiquinone oxidoreductase 75 kDa subunit, mitochondrial OS=Bombyx mori OX=7091 PE=3 SV=1	0	98.518	100		sp|Q94511|NDUS1_DROME	NADH-ubiquinone oxidoreductase 75 kDa subunit, mitochondrial OS=Drosophila melanogaster OX=7227 GN=ND-75 PE=2 SV=3	0	64.393	100
P_KWMTBOMO01424		tr|H9JHC4|H9JHC4_BOMMO	Elongation factor 1-beta' OS=Bombyx mori OX=7091 PE=3 SV=1	5.51e-165	100	100		sp|P29522|EF1B2_BOMMO	Elongation factor 1-beta' OS=Bombyx mori OX=7091 PE=1 SV=2	3.22e-163	99.55	100
P_KWMTBOMO01431		tr|H9JHF8|H9JHF8_BOMMO	Voltage-dependent anion-selective channel protein 3 OS=Bombyx mori OX=7091 GN=101739703 PE=3 SV=1	5.89e-131	100	100		sp|Q94920|VDAC_DROME	Voltage-dependent anion-selective channel OS=Drosophila melanogaster OX=7227 GN=porin PE=1 SV=3	8.71e-82	60.656	100
P_KWMTBOMO01452		tr|H9JHD3|H9JHD3_BOMMO	Arginyl-tRNA synthetase OS=Bombyx mori OX=7091 GN=101737924 PE=3 SV=1	0	100	100		sp|Q6P1S4|SYRC_XENTR	Arginine--tRNA ligase, cytoplasmic OS=Xenopus tropicalis OX=8364 GN=rars1 PE=2 SV=1	0	58.85	99.2679
P_KWMTBOMO01579		tr|H9JH15|H9JH15_BOMMO	Uncharacterized protein OS=Bombyx mori OX=7091 PE=3 SV=1	2.14e-165	100	21.0394		sp|Q5F3X8|SC31A_CHICK	Protein transport protein Sec31A OS=Gallus gallus OX=9031 GN=SEC31A PE=2 SV=1	0	32.3	100
P_KWMTBOMO01662		tr|Q19N36|Q19N36_BOMMO	Small GTP binding protein RAB5 OS=Bombyx mori OX=7091 GN=733058 PE=2 SV=1	1.91e-161	100	100		sp|P61021|RAB5B_MOUSE	Ras-related protein Rab-5B OS=Mus musculus OX=10090 GN=Rab5b PE=1 SV=1	1.06e-122	80.374	100
P_KWMTBOMO01708		tr|H9J9C9|H9J9C9_BOMMO	Dynein light intermediate chain OS=Bombyx mori OX=7091 PE=3 SV=1	2.61e-111	99.367	34.0517		sp|Q6PDL0|DC1L2_MOUSE	Cytoplasmic dynein 1 light intermediate chain 2 OS=Mus musculus OX=10090 GN=Dync1li2 PE=1 SV=2	2.12e-142	50.33	98.0603
P_KWMTBOMO01796		tr|Q2F5J2|Q2F5J2_BOMMO	Prohibitin OS=Bombyx mori OX=7091 GN=692987 PE=2 SV=1	0	100	100		sp|P24156|L2CC_DROME	Protein l(2)37Cc OS=Drosophila melanogaster OX=7227 GN=l(2)37Cc PE=2 SV=2	6.28e-169	83.088	99.2701
P_KWMTBOMO01799		tr|Q1HPL3|Q1HPL3_BOMMO	Proteasome 26S non-ATPase subunit 7 OS=Bombyx mori OX=7091 GN=733131 PE=2 SV=1	0	100	100		sp|P26270|PSMD7_DROME	26S proteasome non-ATPase regulatory subunit 7 OS=Drosophila melanogaster OX=7227 GN=Rpn8 PE=1 SV=6	0	80.967	100
P_KWMTBOMO01802		tr|Q3HR36|Q3HR36_BOMMO	L-threonine dehydrogenase OS=Bombyx mori OX=7091 PE=2 SV=1	0	99.706	93.6639		sp|Q2KIR8|TDH_BOVIN	L-threonine 3-dehydrogenase, mitochondrial OS=Bos taurus OX=9913 GN=TDH PE=2 SV=1	4.54e-138	60.062	88.9807
P_KWMTBOMO01806		tr|H9J9G9|H9J9G9_BOMMO	Cation-transporting ATPase OS=Bombyx mori OX=7091 GN=101743411 PE=3 SV=1	0	99.914	100		sp|Q9EPE9|AT131_MOUSE	Manganese-transporting ATPase 13A1 OS=Mus musculus OX=10090 GN=Atp13a1 PE=1 SV=2	0	57.252	100
P_KWMTBOMO01817		tr|H9IVQ5|H9IVQ5_BOMMO	RNA helicase OS=Bombyx mori OX=7091 PE=3 SV=1	0	100	50.332		sp|Q501J6|DDX17_MOUSE	Probable ATP-dependent RNA helicase DDX17 OS=Mus musculus OX=10090 GN=Ddx17 PE=1 SV=1	0	61.331	73.838
P_KWMTBOMO01941		tr|Q5UAQ4|Q5UAQ4_BOMMO	60S ribosomal protein L35 OS=Bombyx mori OX=7091 GN=RpL35 PE=2 SV=1	1.64e-84	100	100		sp|Q69CJ9|RL35_OPHHA	60S ribosomal protein L35 OS=Ophiophagus hannah OX=8665 GN=RPL35 PE=2 SV=3	1.41e-50	67.48	100
P_KWMTBOMO02088		tr|H9J0E7|H9J0E7_BOMMO	Lysine--tRNA ligase OS=Bombyx mori OX=7091 GN=101740883 PE=3 SV=1	0	100	100		sp|Q99MN1|SYK_MOUSE	Lysine--tRNA ligase OS=Mus musculus OX=10090 GN=Kars1 PE=1 SV=1	0	68.206	97.069
P_KWMTBOMO02223		tr|Q1HQC7|Q1HQC7_BOMMO	Aspartate aminotransferase OS=Bombyx mori OX=7091 PE=2 SV=1	0	99.768	100		sp|P00507|AATM_RAT	Aspartate aminotransferase, mitochondrial OS=Rattus norvegicus OX=10116 GN=Got2 PE=1 SV=2	0	62.06	92.3434
P_KWMTBOMO02278		sp|Q75VN3|TCTP_BOMMO	Translationally-controlled tumor protein homolog OS=Bombyx mori OX=7091 GN=Tctp PE=2 SV=1	8.85e-126	100	100		sp|Q75VN3|TCTP_BOMMO	Translationally-controlled tumor protein homolog OS=Bombyx mori OX=7091 GN=Tctp PE=2 SV=1	5.77e-125	100	100
P_KWMTBOMO02450		tr|Q1HQ36|Q1HQ36_BOMMO	Ubiquitin conjugating enzyme E2 OS=Bombyx mori OX=7091 GN=Ubc13 PE=2 SV=1	4.04e-111	100	100		sp|P35128|UBE2N_DROME	Ubiquitin-conjugating enzyme E2 N OS=Drosophila melanogaster OX=7227 GN=ben PE=1 SV=1	3.2e-101	88.742	100
P_KWMTBOMO02477		tr|Q5UAR9|Q5UAR9_BOMMO	Ribosomal protein L19 OS=Bombyx mori OX=7091 GN=RpL19 PE=2 SV=1	1.82e-145	100	100		sp|P36241|RL19_DROME	60S ribosomal protein L19 OS=Drosophila melanogaster OX=7227 GN=RpL19 PE=1 SV=2	4.16e-113	84.343	99
P_KWMTBOMO02500		tr|H9IZ97|H9IZ97_BOMMO	Uncharacterized protein OS=Bombyx mori OX=7091 PE=4 SV=1	0	90.773	100		sp|O75439|MPPB_HUMAN	Mitochondrial-processing peptidase subunit beta OS=Homo sapiens OX=9606 GN=PMPCB PE=1 SV=2	0	68	96.5665
P_KWMTBOMO02535		tr|H9IZB1|H9IZB1_BOMMO	Uncharacterized protein OS=Bombyx mori OX=7091 PE=4 SV=1	0	96.875	70.1269		sp|O08730|GLYG_RAT	Glycogenin-1 OS=Rattus norvegicus OX=10116 GN=Gyg1 PE=2 SV=4	3.47e-117	52.395	38.5236
P_KWMTBOMO02542		tr|Q8T7L8|Q8T7L8_BOMMO	Seroin 1 OS=Bombyx mori OX=7091 PE=2 SV=1	7.09e-73	97.222	100		--	--	--	--	--
P_KWMTBOMO02734		tr|Q9BPS1|Q9BPS1_BOMMO	Elongation factor 1 delta OS=Bombyx mori OX=7091 GN=ef-1d PE=2 SV=1	9.74e-145	100	100		sp|P32192|EF1D_ARTSA	Elongation factor 1-delta OS=Artemia salina OX=85549 PE=1 SV=2	5.9e-72	62.632	93.1373
P_KWMTBOMO02775		tr|H9J1V6|H9J1V6_BOMMO	Very-long-chain enoyl-CoA reductase OS=Bombyx mori OX=7091 GN=101742899 PE=3 SV=1	0	100	100		sp|Q9N5Y2|TECR_CAEEL	Probable very-long-chain enoyl-CoA reductase art-1 OS=Caenorhabditis elegans OX=6239 GN=art-1 PE=3 SV=1	6.15e-119	56.209	100
P_KWMTBOMO02840		sp|Q2F5R8|EIF3E_BOMMO	Eukaryotic translation initiation factor 3 subunit E OS=Bombyx mori OX=7091 GN=eIF3-S6 PE=2 SV=1	0	100	100		sp|Q2F5R8|EIF3E_BOMMO	Eukaryotic translation initiation factor 3 subunit E OS=Bombyx mori OX=7091 GN=eIF3-S6 PE=2 SV=1	0	100	100
P_KWMTBOMO02914		--	--	--	--	--		sp|P13804|ETFA_HUMAN	Electron transfer flavoprotein subunit alpha, mitochondrial OS=Homo sapiens OX=9606 GN=ETFA PE=1 SV=1	4.08e-159	69.136	98.1818
P_KWMTBOMO03003		tr|H9J272|H9J272_BOMMO	Adenylate kinase isoenzyme 6 homolog OS=Bombyx mori OX=7091 GN=101735934 PE=3 SV=1	2.6e-133	100	100		sp|Q7JYV7|KAD6_DROME	Adenylate kinase isoenzyme 6 homolog OS=Drosophila melanogaster OX=7227 GN=Ak6 PE=1 SV=1	3.13e-69	57.317	93.7143
P_KWMTBOMO03027		tr|Q2F5M6|Q2F5M6_BOMMO	Ras small monomeric GTPase Rab6 OS=Bombyx mori OX=7091 PE=2 SV=1	1.13e-158	100	100		sp|O18334|RAB6_DROME	Ras-related protein Rab6 OS=Drosophila melanogaster OX=7227 GN=Rab6 PE=1 SV=1	2.75e-141	90.338	99.0431
P_KWMTBOMO03092		tr|H9J8H0|H9J8H0_BOMMO	Arginine kinase OS=Bombyx mori OX=7091 PE=3 SV=1	0	100	98.4479		sp|Q95PM9|KARG_PLOIN	Arginine kinase OS=Plodia interpunctella OX=58824 GN=ARGK PE=1 SV=1	0	92.394	78.714
P_KWMTBOMO03113		tr|Q2F5V9|Q2F5V9_BOMMO	Translocon-associated protein subunit beta OS=Bombyx mori OX=7091 PE=2 SV=1	1.01e-139	100	100		sp|P43308|SSRB_HUMAN	Translocon-associated protein subunit beta OS=Homo sapiens OX=9606 GN=SSR2 PE=1 SV=1	2.35e-60	52.809	93.6842
P_KWMTBOMO03301		tr|E0D4V7|E0D4V7_BOMMO	Phenylalanyl-tRNA synthetase beta subunit OS=Bombyx mori OX=7091 GN=FRSB PE=2 SV=1	0	100	100		sp|Q9VCA5|SYFB_DROME	Phenylalanine--tRNA ligase beta subunit OS=Drosophila melanogaster OX=7227 GN=beta-PheRS PE=1 SV=1	0	66.893	100
P_KWMTBOMO03430		tr|Q2F5R4|Q2F5R4_BOMMO	Glutamate dehydrogenase (NAD(P)(+)) OS=Bombyx mori OX=7091 GN=692939 PE=2 SV=1	0	100	74.3869		sp|P54385|DHE3_DROME	Glutamate dehydrogenase, mitochondrial OS=Drosophila melanogaster OX=7227 GN=Gdh PE=1 SV=2	0	79.821	76.2943
P_KWMTBOMO03431		tr|H9JA24|H9JA24_BOMMO	Uncharacterized protein OS=Bombyx mori OX=7091 GN=101744716 PE=4 SV=1	0	100	100		sp|Q6P5I8|YIPF5_DANRE	Protein YIPF5 OS=Danio rerio OX=7955 GN=yipf5 PE=2 SV=1	6.66e-50	40.293	100
P_KWMTBOMO03622		tr|H9J9Y4|H9J9Y4_BOMMO	ADP-ribosylation factor-like protein 6-interacting protein 4 OS=Bombyx mori OX=7091 GN=101742090 PE=3 SV=1	8.34e-108	100	98.1481		sp|Q5F4A9|AR6P4_CHICK	ADP-ribosylation factor-like protein 6-interacting protein 4 OS=Gallus gallus OX=9031 GN=ARL6IP4 PE=2 SV=1	4.3e-31	76.119	41.358
P_KWMTBOMO03630		tr|H9J9R7|H9J9R7_BOMMO	Uncharacterized protein OS=Bombyx mori OX=7091 PE=4 SV=1	2.53e-122	74.359	44.1748		sp|Q7TMK9|HNRPQ_MOUSE	Heterogeneous nuclear ribonucleoprotein Q OS=Mus musculus OX=10090 GN=Syncrip PE=1 SV=2	1.08e-179	55.031	78.8026
P_KWMTBOMO03631		tr|H9J9Y8|H9J9Y8_BOMMO	ER membrane protein complex subunit 1 OS=Bombyx mori OX=7091 PE=3 SV=1	0	100	93.1485		sp|Q5ZL00|EMC1_CHICK	ER membrane protein complex subunit 1 OS=Gallus gallus OX=9031 GN=EMC1 PE=2 SV=1	5.23e-32	32.143	45.677
P_KWMTBOMO03721		tr|H9JKE9|H9JKE9_BOMMO	TPR_REGION domain-containing protein OS=Bombyx mori OX=7091 PE=3 SV=2	0	97.586	100		sp|O43765|SGTA_HUMAN	Small glutamine-rich tetratricopeptide repeat-containing protein alpha OS=Homo sapiens OX=9606 GN=SGTA PE=1 SV=1	4.07e-71	42.997	100
P_KWMTBOMO03722		tr|H9JKE1|H9JKE1_BOMMO	Dynamin-type G domain-containing protein OS=Bombyx mori OX=7091 PE=4 SV=1	0	100	76.6917		sp|Q9H4M9|EHD1_HUMAN	EH domain-containing protein 1 OS=Homo sapiens OX=9606 GN=EHD1 PE=1 SV=2	0	69.101	100
P_KWMTBOMO03951		tr|Q5UAL6|Q5UAL6_BOMMO	40S ribosomal protein S27 OS=Bombyx mori OX=7091 GN=RpS27 PE=2 SV=1	1.35e-59	100	100		sp|P55833|RS27_HOMAM	40S ribosomal protein S27 OS=Homarus americanus OX=6706 GN=RPS27 PE=3 SV=2	1.42e-47	78.571	100
P_KWMTBOMO04051		tr|H9JL88|H9JL88_BOMMO	UDPGT domain-containing protein OS=Bombyx mori OX=7091 PE=3 SV=1	0	95.709	99.9003		sp|A0A291PQH4|UGT2_DACCO	UDP-glucosyltransferase 2 OS=Dactylopius coccus OX=765876 GN=UTG2 PE=1 SV=1	6.72e-74	31.836	51.0469
P_KWMTBOMO04132		tr|H9JGQ9|H9JGQ9_BOMMO	WD_REPEATS_REGION domain-containing protein OS=Bombyx mori OX=7091 PE=4 SV=1	0	99.782	75.8678		sp|Q9VU68|WDR1_DROME	Actin-interacting protein 1 OS=Drosophila melanogaster OX=7227 GN=flr PE=2 SV=1	0	66.998	99.6694
P_KWMTBOMO04168		tr|H9JGM3|H9JGM3_BOMMO	Uncharacterized protein OS=Bombyx mori OX=7091 PE=3 SV=1	0	100	100		sp|Q94516|AT5F1_DROME	ATP synthase subunit b, mitochondrial OS=Drosophila melanogaster OX=7227 GN=ATPsynB PE=2 SV=2	1.44e-101	69.036	81.07
P_KWMTBOMO04170		tr|H9JGS8|H9JGS8_BOMMO	UTP--glucose-1-phosphate uridylyltransferase OS=Bombyx mori OX=7091 PE=3 SV=1	0	100	97.8558		sp|Q07130|UGPA_BOVIN	UTP--glucose-1-phosphate uridylyltransferase OS=Bos taurus OX=9913 GN=UGP2 PE=1 SV=2	0	65.737	97.8558
P_KWMTBOMO04330		tr|H9JX71|H9JX71_BOMMO	PCI domain-containing protein OS=Bombyx mori OX=7091 GN=101735320 PE=3 SV=1	0	100	100		sp|Q7KLV9|PSD11_DROME	26S proteasome non-ATPase regulatory subunit 11 OS=Drosophila melanogaster OX=7227 GN=Rpn6 PE=1 SV=1	0	76.54	100
P_KWMTBOMO04427		tr|H9J7B7|H9J7B7_BOMMO	Signal recognition particle receptor subunit beta OS=Bombyx mori OX=7091 PE=3 SV=1	0	100	100		sp|Q9Y5M8|SRPRB_HUMAN	Signal recognition particle receptor subunit beta OS=Homo sapiens OX=9606 GN=SRPRB PE=1 SV=3	2.92e-59	46.575	87.6
P_KWMTBOMO04529		tr|Q2F6C7|Q2F6C7_BOMMO	ADP-ribosylation factor OS=Bombyx mori OX=7091 GN=778456 PE=2 SV=1	9.95e-136	100	100		sp|P61210|ARF1_LOCMI	ADP-ribosylation factor 1 OS=Locusta migratoria OX=7004 GN=ARF1 PE=2 SV=2	7.09e-134	98.901	100
P_KWMTBOMO04584		tr|Q2F5K1|Q2F5K1_BOMMO	Signal sequence receptor subunit gamma OS=Bombyx mori OX=7091 PE=2 SV=1	1.07e-132	100	100		sp|Q9UNL2|SSRG_HUMAN	Translocon-associated protein subunit gamma OS=Homo sapiens OX=9606 GN=SSR3 PE=1 SV=1	8e-87	64.865	100
P_KWMTBOMO04594		tr|Q1HE02|Q1HE02_BOMMO	ALY OS=Bombyx mori OX=7091 GN=733049 PE=2 SV=1	0	100	100		sp|Q58EA2|THO4A_XENLA	THO complex subunit 4-A OS=Xenopus laevis OX=8355 GN=alyref-a PE=2 SV=1	3.73e-51	49.237	100
P_KWMTBOMO04740		tr|H9JK13|H9JK13_BOMMO	Endoplasmic reticulum transmembrane protein OS=Bombyx mori OX=7091 GN=101735495 PE=3 SV=1	8.35e-166	100	100		sp|Q5R8H3|BAP31_PONAB	B-cell receptor-associated protein 31 OS=Pongo abelii OX=9601 GN=BCAP31 PE=2 SV=3	1.47e-45	42.742	100
P_KWMTBOMO04768		tr|H9JK00|H9JK00_BOMMO	Valyl-tRNA synthetase OS=Bombyx mori OX=7091 PE=3 SV=1	0	93.973	100		sp|Q04462|SYVC_RAT	Valine--tRNA ligase OS=Rattus norvegicus OX=10116 GN=Vars1 PE=2 SV=2	0	59.277	100
P_KWMTBOMO04789		tr|Q2F5P7|Q2F5P7_BOMMO	Mitochondrial matrix protein p32 OS=Bombyx mori OX=7091 PE=2 SV=1	0	100	100		sp|Q3T0B6|C1QBP_BOVIN	Complement component 1 Q subcomponent-binding protein, mitochondrial OS=Bos taurus OX=9913 GN=C1QBP PE=2 SV=1	7.3e-40	32.042	100
P_KWMTBOMO04906		tr|H9JEW9|H9JEW9_BOMMO	Aminopeptidase N-8 OS=Bombyx mori OX=7091 GN=101737565 PE=2 SV=1	0	98.024	92.4201		sp|P15145|AMPN_PIG	Aminopeptidase N OS=Sus scrofa OX=9823 GN=ANPEP PE=1 SV=4	9.3e-128	32.057	76.347
P_KWMTBOMO04966		tr|E5EVW5|E5EVW5_BOMMO	Inorganic diphosphatase OS=Bombyx mori OX=7091 PE=3 SV=1	0	100	86.2275		sp|O77460|IPYR_DROME	Inorganic pyrophosphatase OS=Drosophila melanogaster OX=7227 GN=Nurf-38 PE=1 SV=3	1.04e-129	58.389	89.2216
P_KWMTBOMO04992		tr|H9JEZ8|H9JEZ8_BOMMO	Uncharacterized protein OS=Bombyx mori OX=7091 PE=3 SV=1	0	99.614	100		sp|Q21929|DCXR_CAEEL	L-xylulose reductase OS=Caenorhabditis elegans OX=6239 GN=dhs-21 PE=1 SV=2	5.68e-38	33.597	97.6834
P_KWMTBOMO05078		tr|Q2F5L1|Q2F5L1_BOMMO	Signal peptidase complex catalytic subunit SEC11 OS=Bombyx mori OX=7091 PE=2 SV=1	3.67e-131	99.438	100		sp|Q9D8V7|SC11C_MOUSE	Signal peptidase complex catalytic subunit SEC11C OS=Mus musculus OX=10090 GN=Sec11c PE=1 SV=3	1.2e-103	79.429	98.3146
P_KWMTBOMO05178		tr|Q2F5M8|Q2F5M8_BOMMO	Phosphoserine aminotransferase OS=Bombyx mori OX=7091 PE=2 SV=1	0	100	100		sp|Q9VAN0|SERC_DROME	Probable phosphoserine aminotransferase OS=Drosophila melanogaster OX=7227 GN=CG11899 PE=2 SV=1	9.9e-147	64.935	96.8553
P_KWMTBOMO05258		tr|H9IZ08|H9IZ08_BOMMO	Peptidase_M24 domain-containing protein OS=Bombyx mori OX=7091 GN=101746307 PE=3 SV=1	0	100	100		sp|Q6AYD3|PA2G4_RAT	Proliferation-associated protein 2G4 OS=Rattus norvegicus OX=10116 GN=Pa2g4 PE=1 SV=1	1.26e-149	57.778	94.9868
P_KWMTBOMO05281		tr|H9IZ19|H9IZ19_BOMMO	Uncharacterized protein OS=Bombyx mori OX=7091 GN=101735890 PE=3 SV=1	4.73e-144	100	100		sp|Q9CQC9|SAR1B_MOUSE	GTP-binding protein SAR1b OS=Mus musculus OX=10090 GN=Sar1b PE=1 SV=1	9.93e-107	75	100
P_KWMTBOMO05299		tr|H9IYR7|H9IYR7_BOMMO	Uncharacterized protein OS=Bombyx mori OX=7091 PE=3 SV=1	0	96.091	98.0831		sp|O95749|GGPPS_HUMAN	Geranylgeranyl pyrophosphate synthase OS=Homo sapiens OX=9606 GN=GGPS1 PE=1 SV=1	5.33e-131	60.357	89.4569
P_KWMTBOMO05321		tr|H9IYQ9|H9IYQ9_BOMMO	Uncharacterized protein OS=Bombyx mori OX=7091 PE=3 SV=1	0	99.85	97.654		sp|Q9VA73|CMC_DROME	Calcium-binding mitochondrial carrier protein Aralar1 OS=Drosophila melanogaster OX=7227 GN=aralar1 PE=2 SV=1	0	69.001	98.3871
P_KWMTBOMO05464		tr|H9JB09|H9JB09_BOMMO	Vasa intronic protein OS=Bombyx mori OX=7091 GN=101741313 PE=2 SV=1	0	100	100		sp|Q6AXS5|PAIRB_RAT	Plasminogen activator inhibitor 1 RNA-binding protein OS=Rattus norvegicus OX=10116 GN=Serbp1 PE=1 SV=2	1.23e-20	40.625	41.1311
P_KWMTBOMO05651		tr|H9JB94|H9JB94_BOMMO	Malectin domain-containing protein OS=Bombyx mori OX=7091 GN=101744143 PE=3 SV=1	0	99.621	100		sp|Q14165|MLEC_HUMAN	Malectin OS=Homo sapiens OX=9606 GN=MLEC PE=1 SV=1	8.2e-90	53.226	93.9394
P_KWMTBOMO05687		tr|A8R081|A8R081_BOMMO	Bombyx homolog of P-element somatic inhibitor OS=Bombyx mori OX=7091 GN=BmPSI PE=2 SV=1	1.37e-12	23.754	27.5222		sp|Q00341|VIGLN_HUMAN	Vigilin OS=Homo sapiens OX=9606 GN=HDLBP PE=1 SV=2	0	49.197	100
P_KWMTBOMO05723		tr|Q5UAM7|Q5UAM7_BOMMO	Ribosomal protein S15A OS=Bombyx mori OX=7091 GN=RpS15A PE=2 SV=1	5.26e-94	100	100		sp|Q6XIM8|RS15A_DROYA	40S ribosomal protein S15a OS=Drosophila yakuba OX=7245 GN=RpS15Aa PE=2 SV=3	3.84e-87	93.077	100
P_KWMTBOMO05784		tr|H9JBN7|H9JBN7_BOMMO	DUF1681 domain-containing protein OS=Bombyx mori OX=7091 PE=3 SV=1	3.74e-118	100	66.1088		sp|Q9VXB0|NECAP_DROME	NECAP-like protein CG9132 OS=Drosophila melanogaster OX=7227 GN=CG9132 PE=2 SV=1	5.98e-101	59.216	100
P_KWMTBOMO05806		tr|H9JBP6|H9JBP6_BOMMO	Thioredoxin domain-containing protein OS=Bombyx mori OX=7091 PE=4 SV=1	0	100	93.9726		sp|Q9D1Q6|ERP44_MOUSE	Endoplasmic reticulum resident protein 44 OS=Mus musculus OX=10090 GN=Erp44 PE=1 SV=1	3.26e-135	51.781	100
P_KWMTBOMO05810		tr|H9JBQ0|H9JBQ0_BOMMO	Uncharacterized protein OS=Bombyx mori OX=7091 PE=4 SV=1	0	99.381	50.3565		sp|Q8SWU7|OLA1_DROME	Obg-like ATPase 1 OS=Drosophila melanogaster OX=7227 GN=CG1354 PE=1 SV=1	4.43e-180	78.274	14.9733
P_KWMTBOMO06045		tr|H9J005|H9J005_BOMMO	TOG domain-containing protein OS=Bombyx mori OX=7091 PE=3 SV=2	0	93.348	100		sp|E9PVA8|GCN1_MOUSE	eIF-2-alpha kinase activator GCN1 OS=Mus musculus OX=10090 GN=Gcn1 PE=1 SV=1	0	45.751	100
P_KWMTBOMO06291		tr|H9IX45|H9IX45_BOMMO	C2H2-type domain-containing protein OS=Bombyx mori OX=7091 GN=101746228 PE=4 SV=1	0	100	100		--	--	--	--	--
P_KWMTBOMO06299		tr|H9IX47|H9IX47_BOMMO	RNA exonuclease 4 OS=Bombyx mori OX=7091 GN=101746969 PE=3 SV=1	6.14e-62	100	81.6514		sp|Q6PAQ4|REXO4_MOUSE	RNA exonuclease 4 OS=Mus musculus OX=10090 GN=Rexo4 PE=2 SV=2	2.97e-07	35.526	69.7248
P_KWMTBOMO06354		tr|H9JR23|H9JR23_BOMMO	Aminotran_1_2 domain-containing protein OS=Bombyx mori OX=7091 PE=4 SV=1	0	94.624	90.1163		sp|Q28DB5|ALAT2_XENTR	Alanine aminotransferase 2 OS=Xenopus tropicalis OX=8364 GN=gpt2 PE=2 SV=1	0	58.078	94.7674
P_KWMTBOMO06373		tr|Q2F5L8|Q2F5L8_BOMMO	Ribonucloprotein OS=Bombyx mori OX=7091 PE=2 SV=1	8.53e-93	100	100		sp|Q5XH16|NH2L1_XENLA	NHP2-like protein 1 OS=Xenopus laevis OX=8355 GN=snu13 PE=2 SV=1	4.36e-77	81.89	97.6923
P_KWMTBOMO06427		tr|Q2F5L0|Q2F5L0_BOMMO	Signal sequence receptor subunit alpha OS=Bombyx mori OX=7091 GN=778461 PE=2 SV=1	0	100	100		sp|P43307|SSRA_HUMAN	Translocon-associated protein subunit alpha OS=Homo sapiens OX=9606 GN=SSR1 PE=1 SV=3	6.17e-70	50.45	79.5699
P_KWMTBOMO06595		tr|I3VR81|I3VR81_BOMMO	Aminopeptidase OS=Bombyx mori OX=7091 PE=2 SV=1	0	100	100		sp|P55786|PSA_HUMAN	Puromycin-sensitive aminopeptidase OS=Homo sapiens OX=9606 GN=NPEPPS PE=1 SV=2	0	57.324	100
P_KWMTBOMO06639		tr|Q2F5Q1|Q2F5Q1_BOMMO	Lysophospholipase OS=Bombyx mori OX=7091 PE=2 SV=1	6.85e-166	100	100		sp|Q3MHR0|LYPA1_BOVIN	Acyl-protein thioesterase 1 OS=Bos taurus OX=9913 GN=LYPLA1 PE=2 SV=1	6.45e-78	53.425	99.5455
P_KWMTBOMO06660		tr|Q2F640|Q2F640_BOMMO	Ubiquinol-cytochrome c reductase core protein II OS=Bombyx mori OX=7091 GN=100127121 PE=2 SV=1	0	100	100		sp|P22695|QCR2_HUMAN	Cytochrome b-c1 complex subunit 2, mitochondrial OS=Homo sapiens OX=9606 GN=UQCRC2 PE=1 SV=3	1.22e-72	34.615	95.1945
P_KWMTBOMO06763		tr|H9JR70|H9JR70_BOMMO	Uncharacterized protein OS=Bombyx mori OX=7091 PE=4 SV=1	0	99.694	100		--	--	--	--	--
P_KWMTBOMO06822		tr|H9JR93|H9JR93_BOMMO	Aa_trans domain-containing protein OS=Bombyx mori OX=7091 PE=4 SV=1	0	79.582	95.7778		sp|Q5RC98|S38AA_PONAB	Putative sodium-coupled neutral amino acid transporter 10 OS=Pongo abelii OX=9601 GN=SLC38A10 PE=2 SV=1	1.98e-84	35.204	43.5556
P_KWMTBOMO06927		tr|Q0N2S2|Q0N2S2_BOMMO	Small GTP-binding protein Rab10 OS=Bombyx mori OX=7091 GN=778528 PE=2 SV=1	2.84e-152	100	100		sp|P22127|RAB10_DIPOM	Ras-related protein Rab-10 OS=Diplobatis ommata OX=1870830 PE=2 SV=1	9.8e-110	75.862	100
P_KWMTBOMO06999		tr|H9JLS3|H9JLS3_BOMMO	TPR_REGION domain-containing protein OS=Bombyx mori OX=7091 PE=3 SV=1	0	100	100		sp|P31948|STIP1_HUMAN	Stress-induced-phosphoprotein 1 OS=Homo sapiens OX=9606 GN=STIP1 PE=1 SV=1	0	52.007	100
P_KWMTBOMO07061		tr|H9JLP3|H9JLP3_BOMMO	Uncharacterized protein OS=Bombyx mori OX=7091 PE=3 SV=1	2.05e-51	100	50.3106		sp|Q5R979|PGM2L_PONAB	Glucose 1,6-bisphosphate synthase OS=Pongo abelii OX=9601 GN=PGM2L1 PE=2 SV=1	4.81e-32	37.5	99.3789
P_KWMTBOMO07103		tr|Q2F5P8|Q2F5P8_BOMMO	Malate dehydrogenase OS=Bombyx mori OX=7091 PE=2 SV=1	0	100	100		sp|O88989|MDHC_RAT	Malate dehydrogenase, cytoplasmic OS=Rattus norvegicus OX=10116 GN=Mdh1 PE=1 SV=3	7.95e-157	65.653	99.3958
P_KWMTBOMO07214		tr|D5MTP2|D5MTP2_BOMMO	Bm8 interacting protein 2-11 OS=Bombyx mori OX=7091 PE=2 SV=1	0	94.898	78.8204		sp|Q9VMA7|TGO1_DROME	Transport and Golgi organization protein 1 OS=Drosophila melanogaster OX=7227 GN=Tango1 PE=1 SV=2	6.97e-56	30.097	48.3244
P_KWMTBOMO07278		tr|H9JM89|H9JM89_BOMMO	PNP_UDP_1 domain-containing protein OS=Bombyx mori OX=7091 GN=101736970 PE=3 SV=1	0	98.214	99.115		sp|Q16831|UPP1_HUMAN	Uridine phosphorylase 1 OS=Homo sapiens OX=9606 GN=UPP1 PE=1 SV=1	1.13e-111	53.135	89.3805
P_KWMTBOMO07323		tr|Q2F6C4|Q2F6C4_BOMMO	T-complex protein 1 subunit delta OS=Bombyx mori OX=7091 PE=2 SV=1	0	99.814	100		sp|Q9NB32|TCPD_OCHTR	T-complex protein 1 subunit delta OS=Ochlerotatus triseriatus OX=7162 PE=2 SV=1	0	69.088	100
P_KWMTBOMO07368		tr|H9JMD1|H9JMD1_BOMMO	Uncharacterized protein OS=Bombyx mori OX=7091 GN=101744608 PE=3 SV=1	8.23e-94	100	100		sp|P24310|CX7A1_HUMAN	Cytochrome c oxidase subunit 7A1, mitochondrial OS=Homo sapiens OX=9606 GN=COX7A1 PE=1 SV=2	3.33e-12	47.458	45.3846
P_KWMTBOMO07554		tr|H9J8L8|H9J8L8_BOMMO	Uncharacterized protein OS=Bombyx mori OX=7091 PE=4 SV=1	8.48e-153	100	53.1863		sp|Q9NQC3|RTN4_HUMAN	Reticulon-4 OS=Homo sapiens OX=9606 GN=RTN4 PE=1 SV=2	2.84e-61	45.494	57.1078
P_KWMTBOMO07600		tr|Q1HPU6|Q1HPU6_BOMMO	Sec61p gamma subunit OS=Bombyx mori OX=7091 GN=733141 PE=2 SV=1	5.06e-45	100	100		sp|Q7Z1B8|S61G1_GRYOR	Protein transport protein Sec61 subunit gamma OS=Gryllotalpa orientalis OX=213494 GN=SEC61G PE=3 SV=1	3.67e-42	91.176	100
P_KWMTBOMO07761		tr|H9IUG4|H9IUG4_BOMMO	Uncharacterized protein OS=Bombyx mori OX=7091 PE=4 SV=1	0	94.605	26.4072		sp|Q8MSS1|LVA_DROME	Protein lava lamp OS=Drosophila melanogaster OX=7227 GN=lva PE=1 SV=2	5.58e-15	35.644	7.01876
P_KWMTBOMO07772		tr|Q5UAN4|Q5UAN4_BOMMO	Ribosomal protein S10 OS=Bombyx mori OX=7091 GN=RpS10 PE=2 SV=1	4.4e-118	100	100		sp|Q962R9|RS10_SPOFR	40S ribosomal protein S10 OS=Spodoptera frugiperda OX=7108 GN=RpS10 PE=2 SV=1	1.19e-105	92.453	99.375
P_KWMTBOMO07857		tr|Q5R1P5|Q5R1P5_BOMMO	Heat shock protein hsp21.4 OS=Bombyx mori OX=7091 GN=Hsp21.4 PE=2 SV=1	4.58e-139	100	100		sp|Q00649|HSPB1_CHICK	Heat shock protein beta-1 OS=Gallus gallus OX=9031 GN=HSPB1 PE=2 SV=1	5.62e-19	47.727	47.0588
P_KWMTBOMO08041		tr|H9IV46|H9IV46_BOMMO	Rab proteins geranylgeranyltransferase component A OS=Bombyx mori OX=7091 GN=101740100 PE=3 SV=1	0	100	100		sp|Q9V8W3|RABEP_DROME	Rab proteins geranylgeranyltransferase component A OS=Drosophila melanogaster OX=7227 GN=Rep PE=1 SV=1	6.05e-105	36.542	97.3231
P_KWMTBOMO08056		tr|H9IV39|H9IV39_BOMMO	Rab GDP dissociation inhibitor OS=Bombyx mori OX=7091 GN=101738804 PE=3 SV=1	0	100	100		sp|P21856|GDIA_BOVIN	Rab GDP dissociation inhibitor alpha OS=Bos taurus OX=9913 GN=GDI1 PE=1 SV=1	0	68.75	100
P_KWMTBOMO08064		tr|Q5UAR1|Q5UAR1_BOMMO	60S ribosomal protein L27a OS=Bombyx mori OX=7091 GN=RpL27A PE=2 SV=1	3.15e-107	100	100		sp|P47830|RL27A_XENLA	60S ribosomal protein L27a OS=Xenopus laevis OX=8355 GN=rpl27a PE=2 SV=2	1.19e-82	77.027	100
P_KWMTBOMO08098		tr|G9FL14|G9FL14_BOMMO	DNA supercoiling factor OS=Bombyx mori OX=7091 GN=LOC692759 PE=2 SV=1	1.98e-48	100	100		sp|B5X4E0|CALUB_SALSA	Calumenin-B OS=Salmo salar OX=8030 GN=calub PE=2 SV=1	7.32e-13	49.333	100
P_KWMTBOMO08204		tr|H9JIZ5|H9JIZ5_BOMMO	Arf-GAP domain-containing protein OS=Bombyx mori OX=7091 GN=101746692 PE=4 SV=1	0	100	100		sp|Q28CM8|ARFG2_XENTR	ADP-ribosylation factor GTPase-activating protein 2 OS=Xenopus tropicalis OX=8364 GN=arfgap2 PE=2 SV=1	1.27e-99	39.455	100
P_KWMTBOMO08323		tr|H9JI91|H9JI91_BOMMO	Uncharacterized protein OS=Bombyx mori OX=7091 PE=4 SV=1	0	99.643	98.2456		sp|Q5R4J9|NAA15_PONAB	N-alpha-acetyltransferase 15, NatA auxiliary subunit OS=Pongo abelii OX=9601 GN=NAA15 PE=2 SV=1	4.44e-47	41.985	91.9298
P_KWMTBOMO08440		tr|Q5UAM6|Q5UAM6_BOMMO	Ribosomal protein S16 OS=Bombyx mori OX=7091 GN=RpS16 PE=2 SV=1	8.57e-109	100	100		sp|Q95V31|RS16_SPOFR	40S ribosomal protein S16 OS=Spodoptera frugiperda OX=7108 GN=RpS16 PE=2 SV=1	1.88e-104	98.013	100
P_KWMTBOMO08464		sp|P21828|FIBL_BOMMO	Fibroin light chain OS=Bombyx mori OX=7091 GN=FIBL PE=1 SV=1	0	100	100		sp|P21828|FIBL_BOMMO	Fibroin light chain OS=Bombyx mori OX=7091 GN=FIBL PE=1 SV=1	0	100	100
P_KWMTBOMO08578		tr|H9JDK4|H9JDK4_BOMMO	Multifunctional fusion protein OS=Bombyx mori OX=7091 GN=101741966 PE=3 SV=1	0	100	100		sp|Q7SY23|AL4A1_DANRE	Delta-1-pyrroline-5-carboxylate dehydrogenase, mitochondrial OS=Danio rerio OX=7955 GN=aldh4a1 PE=2 SV=1	0	55.159	94.3363
P_KWMTBOMO08596		tr|H9JEM4|H9JEM4_BOMMO	Uncharacterized protein OS=Bombyx mori OX=7091 PE=3 SV=1	1.43e-162	100	97.6959		sp|Q7SXP0|S22BB_DANRE	Vesicle-trafficking protein SEC22b-B OS=Danio rerio OX=7955 GN=sec22bb PE=2 SV=1	4.44e-87	56.621	100
P_KWMTBOMO08655		tr|Q2F649|Q2F649_BOMMO	Surfeit 4-like protein OS=Bombyx mori OX=7091 PE=2 SV=1	0	100	100		sp|O18405|SURF4_DROME	Surfeit locus protein 4 homolog OS=Drosophila melanogaster OX=7227 GN=Surf4 PE=2 SV=1	2.43e-168	81.852	100
P_KWMTBOMO08707		tr|H9JDR8|H9JDR8_BOMMO	Elongator complex protein 3 OS=Bombyx mori OX=7091 PE=3 SV=1	0	99.66	82.4684		sp|Q5ZHS1|ELP3_CHICK	Elongator complex protein 3 OS=Gallus gallus OX=9031 GN=ELP3 PE=2 SV=1	0	84.962	74.6143
P_KWMTBOMO08894		tr|Q5UAN9|Q5UAN9_BOMMO	Ribosomal protein S5 OS=Bombyx mori OX=7091 GN=RpS5 PE=2 SV=1	3.62e-166	100	100		sp|P46782|RS5_HUMAN	40S ribosomal protein S5 OS=Homo sapiens OX=9606 GN=RPS5 PE=1 SV=4	1.84e-134	91.327	89.4977
P_KWMTBOMO08961		tr|Q5UAQ8|Q5UAQ8_BOMMO	60S ribosomal protein L30 OS=Bombyx mori OX=7091 GN=RpL30 PE=2 SV=1	2.87e-80	100	100		sp|P58375|RL30_SPOFR	60S ribosomal protein L30 OS=Spodoptera frugiperda OX=7108 GN=RpL30 PE=3 SV=1	9.75e-78	99.099	98.2301
P_KWMTBOMO09055		tr|H9JDA5|H9JDA5_BOMMO	Proton-translocating NAD(P)(+) transhydrogenase OS=Bombyx mori OX=7091 PE=3 SV=1	0	93.082	100		sp|P11024|NNTM_BOVIN	NAD(P) transhydrogenase, mitochondrial OS=Bos taurus OX=9913 GN=NNT PE=1 SV=3	0	59.925	100
P_KWMTBOMO09183		tr|H9J1H4|H9J1H4_BOMMO	Uncharacterized protein OS=Bombyx mori OX=7091 PE=4 SV=1	0	99.804	46.6179		sp|O00410|IPO5_HUMAN	Importin-5 OS=Homo sapiens OX=9606 GN=IPO5 PE=1 SV=4	0	52.516	99.9086
P_KWMTBOMO09232		tr|Q5UAS9|Q5UAS9_BOMMO	Ribosomal protein L10A OS=Bombyx mori OX=7091 GN=RpL10A PE=2 SV=1	4.16e-162	100	100		sp|Q963B6|RL10A_SPOFR	60S ribosomal protein L10a OS=Spodoptera frugiperda OX=7108 GN=RpL10A PE=2 SV=1	1.14e-156	96.774	100
P_KWMTBOMO09250		tr|H9J1E3|H9J1E3_BOMMO	IU_nuc_hydro domain-containing protein OS=Bombyx mori OX=7091 PE=4 SV=1	0	98.442	96.3964		--	--	--	--	--
P_KWMTBOMO09355		tr|Q6T3A7|Q6T3A7_BOMMO	Thiol peroxiredoxin OS=Bombyx mori OX=7091 GN=692638 PE=2 SV=1	5.6e-148	100	100		sp|Q9V3P0|PRDX1_DROME	Peroxiredoxin 1 OS=Drosophila melanogaster OX=7227 GN=Jafrac1 PE=1 SV=1	8.32e-117	81.152	97.9487
P_KWMTBOMO09553		tr|Q1HPN7|Q1HPN7_BOMMO	Fructose-bisphosphate aldolase OS=Bombyx mori OX=7091 GN=778467 PE=2 SV=1	0	100	100		sp|P07764|ALF_DROME	Fructose-bisphosphate aldolase OS=Drosophila melanogaster OX=7227 GN=Ald1 PE=1 SV=5	0	82.143	100
P_KWMTBOMO09597		tr|H9JXD6|H9JXD6_BOMMO	Carrier domain-containing protein OS=Bombyx mori OX=7091 PE=3 SV=1	0	99.659	63.2829		sp|Q63ZT8|AL1L1_XENTR	Cytosolic 10-formyltetrahydrofolate dehydrogenase OS=Xenopus tropicalis OX=8364 GN=aldh1l1 PE=2 SV=1	0	63.865	98.9201
P_KWMTBOMO09631		tr|H9JTW9|H9JTW9_BOMMO	GOLD domain-containing protein OS=Bombyx mori OX=7091 GN=101737070 PE=3 SV=1	5.12e-155	100	100		sp|P49020|TMED2_CRIGR	Transmembrane emp24 domain-containing protein 2 (Fragment) OS=Cricetulus griseus OX=10029 GN=TMED2 PE=1 SV=1	4.26e-87	63.587	90.1961
P_KWMTBOMO09672		tr|H9JTU8|H9JTU8_BOMMO	Uncharacterized protein OS=Bombyx mori OX=7091 PE=4 SV=1	7.15e-83	98.276	42.6471		sp|P48738|PIPNA_RABIT	Phosphatidylinositol transfer protein alpha isoform OS=Oryctolagus cuniculus OX=9986 GN=PITPNA PE=3 SV=2	1.85e-115	59.928	100
P_KWMTBOMO09709		tr|H9JKR5|H9JKR5_BOMMO	CRAL-TRIO domain-containing protein OS=Bombyx mori OX=7091 GN=101736546 PE=4 SV=1	4.6e-53	36.226	100		sp|Q9D3D0|TTPAL_MOUSE	Alpha-tocopherol transfer protein-like OS=Mus musculus OX=10090 GN=Ttpal PE=1 SV=3	1.73e-10	26.111	68.4411
P_KWMTBOMO09838		tr|H9JUC0|H9JUC0_BOMMO	Asparagine--tRNA ligase OS=Bombyx mori OX=7091 PE=3 SV=1	0	99.104	100		sp|Q2KJG3|SYNC_BOVIN	Asparagine--tRNA ligase, cytoplasmic OS=Bos taurus OX=9913 GN=NARS PE=2 SV=3	0	70.599	99.4585
P_KWMTBOMO09876		tr|H9JUE4|H9JUE4_BOMMO	Uncharacterized protein OS=Bombyx mori OX=7091 PE=3 SV=1	9.18e-74	100	100		sp|O01725|RLA2_BRAFL	60S acidic ribosomal protein P2 OS=Branchiostoma floridae OX=7739 PE=3 SV=1	2.58e-28	56.034	100
P_KWMTBOMO10049		sp|Q5UAP8|RL38_BOMMO	60S ribosomal protein L38 OS=Bombyx mori OX=7091 GN=RpL38 PE=3 SV=1	8.84e-45	100	100		sp|Q5UAP8|RL38_BOMMO	60S ribosomal protein L38 OS=Bombyx mori OX=7091 GN=RpL38 PE=3 SV=1	5.76e-44	100	100
P_KWMTBOMO10128		tr|H9J806|H9J806_BOMMO	Uncharacterized protein OS=Bombyx mori OX=7091 PE=3 SV=1	1.66e-70	100	91.5888		sp|Q9W141|ATPK_DROME	Putative ATP synthase subunit f, mitochondrial OS=Drosophila melanogaster OX=7227 GN=ATPsynF PE=3 SV=1	7.4e-60	75.701	100
P_KWMTBOMO10129		tr|Q2F5X3|Q2F5X3_BOMMO	26S proteasome non-ATPase regulatory subunit 4 OS=Bombyx mori OX=7091 GN=778515 PE=2 SV=1	0	100	100		sp|P55035|PSMD4_DROME	26S proteasome non-ATPase regulatory subunit 4 OS=Drosophila melanogaster OX=7227 GN=Rpn10 PE=1 SV=2	1.63e-145	60.677	100
P_KWMTBOMO10243		tr|H9JCR8|H9JCR8_BOMMO	Ubiquitin carboxyl-terminal hydrolase 7 OS=Bombyx mori OX=7091 PE=3 SV=1	0	95.544	100		sp|Q4VSI4|UBP7_RAT	Ubiquitin carboxyl-terminal hydrolase 7 OS=Rattus norvegicus OX=10116 GN=Usp7 PE=1 SV=1	0	60.572	96.6964
P_KWMTBOMO10337		tr|H9JCI5|H9JCI5_BOMMO	ERF-3 OS=Bombyx mori OX=7091 PE=4 SV=1	0	100	96.3235		sp|Q8R050|ERF3A_MOUSE	Eukaryotic peptide chain release factor GTP-binding subunit ERF3A OS=Mus musculus OX=10090 GN=Gspt1 PE=1 SV=2	0	66.599	90.2574
P_KWMTBOMO10591		tr|Q6PUF7|Q6PUF7_BOMMO	40S ribosomal protein S24 OS=Bombyx mori OX=7091 GN=100101150 PE=2 SV=1	4.69e-94	100	100		sp|Q962Q6|RS24_SPOFR	40S ribosomal protein S24 OS=Spodoptera frugiperda OX=7108 GN=RpS24 PE=2 SV=1	2.8e-92	98.485	100
P_KWMTBOMO10779		tr|Q0N2R5|Q0N2R5_BOMMO	Signal recognition particle receptor alpha subunit OS=Bombyx mori OX=7091 PE=2 SV=1	0	99.51	100		sp|Q9U5L1|SRPRA_DROME	Signal recognition particle receptor subunit alpha homolog OS=Drosophila melanogaster OX=7227 GN=SrpRalpha PE=1 SV=2	0	59.486	100
P_KWMTBOMO10816		tr|H9JFZ5|H9JFZ5_BOMMO	Pyruvate carboxylase OS=Bombyx mori OX=7091 PE=4 SV=1	0	97.263	98.9002		sp|P11498|PYC_HUMAN	Pyruvate carboxylase, mitochondrial OS=Homo sapiens OX=9606 GN=PC PE=1 SV=2	0	68.512	97.8003
P_KWMTBOMO10916		tr|Q1HQ44|Q1HQ44_BOMMO	Proteasome subunit alpha type OS=Bombyx mori OX=7091 PE=2 SV=1	0	100	100		sp|O70435|PSA3_MOUSE	Proteasome subunit alpha type-3 OS=Mus musculus OX=10090 GN=Psma3 PE=1 SV=3	2.47e-130	65.49	100
P_KWMTBOMO10965		tr|Q1HQC6|Q1HQC6_BOMMO	26S protease regulatory subunit 6B OS=Bombyx mori OX=7091 PE=2 SV=1	0	100	100		sp|P46507|PRS6B_MANSE	26S proteasome regulatory subunit 6B OS=Manduca sexta OX=7130 PE=2 SV=1	0	98.313	100
P_KWMTBOMO11021		tr|Q5UAM3|Q5UAM3_BOMMO	Ribosomal protein S19 OS=Bombyx mori OX=7091 GN=RpS19 PE=2 SV=1	6.33e-111	100	100		sp|P39018|RS19A_DROME	40S ribosomal protein S19a OS=Drosophila melanogaster OX=7227 GN=RpS19a PE=1 SV=3	5.94e-71	66.892	96.732
P_KWMTBOMO11110		tr|Q0ZB74|Q0ZB74_BOMMO	Eukaryotic translation initiation factor 5 OS=Bombyx mori OX=7091 PE=2 SV=1	0	100	100		sp|Q9VXK6|IF5_DROME	Eukaryotic translation initiation factor 5 OS=Drosophila melanogaster OX=7227 GN=eIF5 PE=1 SV=1	3.65e-164	54.699	89.6328
P_KWMTBOMO11161		tr|H9JGE8|H9JGE8_BOMMO	26S proteasome non-ATPase regulatory subunit 8 OS=Bombyx mori OX=7091 GN=101737946 PE=3 SV=1	0	100	100		sp|Q9CX56|PSMD8_MOUSE	26S proteasome non-ATPase regulatory subunit 8 OS=Mus musculus OX=10090 GN=Psmd8 PE=1 SV=2	3.67e-110	60.075	100
P_KWMTBOMO11202		tr|H9JT03|H9JT03_BOMMO	F-actin-capping protein subunit alpha OS=Bombyx mori OX=7091 GN=101738938 PE=3 SV=1	0	100	100		sp|Q9W2N0|CAPZA_DROME	F-actin-capping protein subunit alpha OS=Drosophila melanogaster OX=7227 GN=cpa PE=2 SV=1	1.31e-147	68.44	97.9167
P_KWMTBOMO11416		tr|H9IXG0|H9IXG0_BOMMO	ATPase ASNA1 homolog OS=Bombyx mori OX=7091 GN=101735717 PE=3 SV=1	0	100	100		sp|B0WEV5|ASNA_CULQU	ATPase ASNA1 homolog OS=Culex quinquefasciatus OX=7176 GN=CPIJ005690 PE=3 SV=1	0	80.428	97.6119
P_KWMTBOMO11583		tr|H9J3D6|H9J3D6_BOMMO	Cyclin-Q OS=Bombyx mori OX=7091 GN=101735856 PE=3 SV=1	0	100	100		sp|Q4QQW5|CCNQ_RAT	Cyclin-Q OS=Rattus norvegicus OX=10116 GN=Ccnq PE=2 SV=1	4.51e-56	41.441	88.8
P_KWMTBOMO11590		tr|H9J3D2|H9J3D2_BOMMO	Ku domain-containing protein OS=Bombyx mori OX=7091 GN=101736121 PE=4 SV=1	0	98.077	80.6897		sp|O93257|XRCC6_CHICK	X-ray repair cross-complementing protein 5 OS=Gallus gallus OX=9031 GN=XRCC6 PE=2 SV=1	5.59e-42	26.126	95.6897
P_KWMTBOMO11666		tr|Q2V0H5|Q2V0H5_BOMMO	Vesicle-fusing ATPase OS=Bombyx mori OX=7091 GN=ter94 PE=2 SV=1	0	100	100		sp|Q7KN62|TERA_DROME	Transitional endoplasmic reticulum ATPase TER94 OS=Drosophila melanogaster OX=7227 GN=TER94 PE=1 SV=1	0	88.025	100
P_KWMTBOMO11678		tr|Q5UAS7|Q5UAS7_BOMMO	60S ribosomal protein L12 OS=Bombyx mori OX=7091 GN=RpL12 PE=2 SV=1	1.46e-118	100	100		sp|P23358|RL12_RAT	60S ribosomal protein L12 OS=Rattus norvegicus OX=10116 GN=Rpl12 PE=2 SV=1	3.08e-96	81.25	97.561
P_KWMTBOMO11680		tr|H9J390|H9J390_BOMMO	Seryl-tRNA synthetase OS=Bombyx mori OX=7091 GN=101743384 PE=3 SV=1	0	100	100		sp|Q9GMB8|SYSC_BOVIN	Serine--tRNA ligase, cytoplasmic OS=Bos taurus OX=9913 GN=SARS1 PE=2 SV=3	0	69.495	100
P_KWMTBOMO11689		tr|H9J385|H9J385_BOMMO	Uncharacterized protein OS=Bombyx mori OX=7091 PE=4 SV=1	0	100	100		sp|O18373|SPS1_DROME	Inactive selenide, water dikinase-like protein OS=Drosophila melanogaster OX=7227 GN=SelD PE=2 SV=1	0	87.94	99.005
P_KWMTBOMO11987		tr|Q5UAN1|Q5UAN1_BOMMO	40S ribosomal protein S12 OS=Bombyx mori OX=7091 GN=RpS12 PE=2 SV=1	4.19e-99	100	100		sp|P80455|RS12_DROME	40S ribosomal protein S12 OS=Drosophila melanogaster OX=7227 GN=RpS12 PE=1 SV=2	1.09e-68	72.143	100
P_KWMTBOMO12018		tr|Q5UAN7|Q5UAN7_BOMMO	40S ribosomal protein S7 OS=Bombyx mori OX=7091 GN=RpS7 PE=2 SV=1	1.24e-137	99.474	100		sp|P48155|RS7_MANSE	40S ribosomal protein S7 OS=Manduca sexta OX=7130 GN=RpS7 PE=2 SV=1	1.42e-134	97.368	100
P_KWMTBOMO12094		tr|Q1HPM2|Q1HPM2_BOMMO	Phosphoenolpyruvate carboxykinase (GTP) OS=Bombyx mori OX=7091 PE=2 SV=1	0	99.365	99.8415		sp|P20007|PCKG_DROME	Phosphoenolpyruvate carboxykinase [GTP] OS=Drosophila melanogaster OX=7227 GN=Pepck PE=2 SV=2	0	65.645	98.2567
P_KWMTBOMO12189		tr|Q1HPX0|Q1HPX0_BOMMO	Cytochrome c oxidase polypeptide Vb OS=Bombyx mori OX=7091 PE=2 SV=1	1.68e-90	100	100		sp|Q710D6|COX5B_VULVU	Cytochrome c oxidase subunit 5B, mitochondrial OS=Vulpes vulpes OX=9627 GN=COX5B PE=1 SV=1	1.33e-27	44.248	92.623
P_KWMTBOMO12193		tr|H9JXB0|H9JXB0_BOMMO	COX6C domain-containing protein OS=Bombyx mori OX=7091 GN=101746562 PE=3 SV=1	1.23e-53	100	100		sp|Q7YRK7|COX6C_TARSY	Cytochrome c oxidase subunit 6C OS=Tarsius syrichta OX=1868482 GN=COX6C PE=3 SV=1	1.86e-18	53.623	88.4615
P_KWMTBOMO12208		tr|H9JE23|H9JE23_BOMMO	SAC domain-containing protein OS=Bombyx mori OX=7091 PE=4 SV=1	3.33e-156	100	35.9532		sp|Q9W0I6|SAC1_DROME	Phosphatidylinositol-3-phosphatase SAC1 OS=Drosophila melanogaster OX=7227 GN=Sac1 PE=2 SV=1	0	49.144	97.6589
P_KWMTBOMO12285		tr|Q93137|Q93137_BOMMO	Reverse transcriptase OS=Bombyx mori OX=7091 PE=4 SV=1	0	71.082	49.2391		sp|O17449|TBB1_MANSE	Tubulin beta-1 chain OS=Manduca sexta OX=7130 PE=2 SV=1	0	99.769	23.4783
P_KWMTBOMO12400		tr|H9JSB8|H9JSB8_BOMMO	RRM domain-containing protein OS=Bombyx mori OX=7091 PE=4 SV=1	7.88e-54	100	70		--	--	--	--	--
P_KWMTBOMO12428		sp|Q5UAS2|RL17_BOMMO	60S ribosomal protein L17 OS=Bombyx mori OX=7091 GN=RpL17 PE=2 SV=1	5.32e-141	100	100		sp|Q5UAS2|RL17_BOMMO	60S ribosomal protein L17 OS=Bombyx mori OX=7091 GN=RpL17 PE=2 SV=1	3.47e-140	100	100
P_KWMTBOMO12448		tr|H9IYM5|H9IYM5_BOMMO	Secretory carrier-associated membrane protein OS=Bombyx mori OX=7091 PE=3 SV=1	1.69e-99	87.5	73.0159		sp|Q8K021|SCAM1_MOUSE	Secretory carrier-associated membrane protein 1 OS=Mus musculus OX=10090 GN=Scamp1 PE=1 SV=1	8.88e-77	52.838	90.873
P_KWMTBOMO12461		tr|Q4JI71|Q4JI71_BOMMO	FK506-binding protein OS=Bombyx mori OX=7091 GN=FKBP45 PE=2 SV=1	0	100	100		sp|Q26486|FKBP4_SPOFR	46 kDa FK506-binding nuclear protein OS=Spodoptera frugiperda OX=7108 GN=FKBP46 PE=2 SV=1	0	71.838	100
P_KWMTBOMO12483		tr|Q66SV9|Q66SV9_BOMMO	40S ribosomal protein S15 OS=Bombyx mori OX=7091 GN=S15 PE=2 SV=1	9.24e-107	100	100		sp|P62844|RS15_PIG	40S ribosomal protein S15 OS=Sus scrofa OX=9823 GN=RPS15 PE=1 SV=2	2.23e-77	81.633	100
P_KWMTBOMO12602		tr|H9IWB5|H9IWB5_BOMMO	Uncharacterized protein OS=Bombyx mori OX=7091 PE=3 SV=1	0	95.142	67.5882		sp|P37276|DYHC_DROME	Dynein heavy chain, cytoplasmic OS=Drosophila melanogaster OX=7227 GN=Dhc64C PE=2 SV=2	0	79.96	99.7778
P_KWMTBOMO12628		tr|H9IWC7|H9IWC7_BOMMO	Isoleucyl-tRNA synthetase OS=Bombyx mori OX=7091 GN=101742308 PE=3 SV=1	0	99.835	100		sp|Q8BU30|SYIC_MOUSE	Isoleucine--tRNA ligase, cytoplasmic OS=Mus musculus OX=10090 GN=Iars1 PE=1 SV=2	0	60.246	100
P_KWMTBOMO12706		tr|Q5UAQ2|Q5UAQ2_BOMMO	60S ribosomal protein L36 OS=Bombyx mori OX=7091 GN=RpL36 PE=2 SV=1	1.02e-81	100	100		sp|P49630|RL36_DROME	60S ribosomal protein L36 OS=Drosophila melanogaster OX=7227 GN=RpL36 PE=1 SV=1	4.53e-50	71.304	96.6387
P_KWMTBOMO12878		tr|Q0KIX8|Q0KIX8_BOMMO	Glutamate synthase OS=Bombyx mori OX=7091 GN=BmGOGAT PE=2 SV=1	0	99.658	100		sp|Q18164|DPYD_CAEEL	Dihydropyrimidine dehydrogenase [NADP(+)] OS=Caenorhabditis elegans OX=6239 GN=dpyd-1 PE=3 SV=2	2.57e-20	29.206	15.3959
P_KWMTBOMO12965		tr|H9IT68|H9IT68_BOMMO	Vesicle-fusing ATPase OS=Bombyx mori OX=7091 PE=3 SV=1	0	99.828	55.4814		sp|P46461|NSF1_DROME	Vesicle-fusing ATPase 1 OS=Drosophila melanogaster OX=7227 GN=comt PE=2 SV=1	0	72.851	69.8761
P_KWMTBOMO13370		tr|H9JN38|H9JN38_BOMMO	Signal recognition particle subunit SRP72 OS=Bombyx mori OX=7091 PE=3 SV=1	0	100	66.306		sp|O76094|SRP72_HUMAN	Signal recognition particle subunit SRP72 OS=Homo sapiens OX=9606 GN=SRP72 PE=1 SV=3	7.11e-121	37.721	96.2906
P_KWMTBOMO13520		tr|Q2F5T2|Q2F5T2_BOMMO	Calmodulin OS=Bombyx mori OX=7091 PE=2 SV=1	5.64e-106	100	100		sp|P62153|CALMA_HALRO	Calmodulin-A OS=Halocynthia roretzi OX=7729 PE=1 SV=2	3.68e-105	100	100
P_KWMTBOMO13597		tr|H9JN56|H9JN56_BOMMO	GOLD domain-containing protein OS=Bombyx mori OX=7091 PE=3 SV=1	8.08e-165	100	100		sp|B4NKL0|TMEDE_DROWI	Transmembrane emp24 domain-containing protein eca OS=Drosophila willistoni OX=7260 GN=eca PE=3 SV=1	1.07e-127	80.952	96.7742
P_KWMTBOMO13722		tr|H9JPQ0|H9JPQ0_BOMMO	Uncharacterized protein OS=Bombyx mori OX=7091 PE=3 SV=1	2.24e-39	100	73.5632		sp|Q99417|MYCBP_HUMAN	c-Myc-binding protein OS=Homo sapiens OX=9606 GN=MYCBP PE=1 SV=3	2.31e-23	56.944	82.7586
P_KWMTBOMO13723		tr|Q1HPX3|Q1HPX3_BOMMO	ATP synthase subunit O, mitochondrial OS=Bombyx mori OX=7091 PE=2 SV=1	1.17e-152	100	100		sp|Q24439|ATPO_DROME	ATP synthase subunit O, mitochondrial OS=Drosophila melanogaster OX=7227 GN=ATPsynO PE=2 SV=2	7.56e-89	61.692	96.1722
P_KWMTBOMO13729		tr|Q684K3|Q684K3_BOMMO	Protein-synthesizing GTPase OS=Bombyx mori OX=7091 GN=eIF2g PE=2 SV=1	0	100	100		sp|Q24208|IF2G_DROME	Eukaryotic translation initiation factor 2 subunit 3 OS=Drosophila melanogaster OX=7227 GN=eIF2gamma PE=2 SV=1	0	84.12	99.5726
P_KWMTBOMO13774		tr|Q2F5W7|Q2F5W7_BOMMO	Ras-related GTP-binding protein 4b OS=Bombyx mori OX=7091 GN=692901 PE=2 SV=1	6.54e-160	100	100		sp|Q68EK7|RAB4B_DANRE	Ras-related protein Rab-4B OS=Danio rerio OX=7955 GN=rab4b PE=2 SV=1	5.07e-117	74.648	99.5327
P_KWMTBOMO13800		tr|H9JPL2|H9JPL2_BOMMO	60S ribosomal protein L18a OS=Bombyx mori OX=7091 PE=3 SV=1	4.32e-132	100	100		sp|Q8WQI7|RL18A_SPOFR	60S ribosomal protein L18a OS=Spodoptera frugiperda OX=7108 GN=RpL18A PE=2 SV=1	1.32e-126	95.48	100
P_KWMTBOMO14041		tr|Q2F5J1|Q2F5J1_BOMMO	26S proteasome non-ATPase regulatory subunit 13 OS=Bombyx mori OX=7091 PE=2 SV=1	0	100	100		sp|B0BN93|PSD13_RAT	26S proteasome non-ATPase regulatory subunit 13 OS=Rattus norvegicus OX=10116 GN=Psmd13 PE=1 SV=1	1.26e-102	46.921	88.5714
P_KWMTBOMO14157		tr|H9JNS6|H9JNS6_BOMMO	Coatomer subunit gamma OS=Bombyx mori OX=7091 GN=692402 PE=3 SV=1	0	99.768	100		sp|Q29AE5|COPG_DROPS	Coatomer subunit gamma OS=Drosophila pseudoobscura pseudoobscura OX=46245 GN=gammaCop PE=3 SV=1	0	58.75	100
P_KWMTBOMO14160		tr|H9JPF8|H9JPF8_BOMMO	Iso_dh domain-containing protein OS=Bombyx mori OX=7091 PE=3 SV=1	0	100	100		sp|Q58CP0|IDH3G_BOVIN	Isocitrate dehydrogenase [NAD] subunit gamma, mitochondrial OS=Bos taurus OX=9913 GN=IDH3G PE=2 SV=1	5.17e-132	50.653	98.7113
P_KWMTBOMO14478		tr|H9IS48|H9IS48_BOMMO	Uncharacterized protein OS=Bombyx mori OX=7091 GN=101742289 PE=3 SV=1	1.04e-66	100	100		sp|Q9W1V3|FBRL_DROME	rRNA 2'-O-methyltransferase fibrillarin OS=Drosophila melanogaster OX=7227 GN=Fib PE=2 SV=1	4.31e-61	94.737	100
P_KWMTBOMO14530		tr|Q2F5R7|Q2F5R7_BOMMO	Eukaryotic peptide chain release factor subunit 1 OS=Bombyx mori OX=7091 PE=2 SV=1	0	99.314	100		sp|Q9VPH7|ERF1_DROME	Eukaryotic peptide chain release factor subunit 1 OS=Drosophila melanogaster OX=7227 GN=eRF1 PE=1 SV=2	0	93.822	100
P_KWMTBOMO14639		tr|Q5UAQ6|Q5UAQ6_BOMMO	60S ribosomal protein L32 OS=Bombyx mori OX=7091 GN=RpL32 PE=2 SV=1	1.84e-97	100	100		sp|Q962T1|RL32_SPOFR	60S ribosomal protein L32 OS=Spodoptera frugiperda OX=7108 GN=RpL32 PE=2 SV=1	6.75e-95	97.761	100
P_KWMTBOMO14715		tr|Q1HPL2|Q1HPL2_BOMMO	Phosphate carrier 1 OS=Bombyx mori OX=7091 GN=PiC PE=2 SV=1	0	100	100		sp|O61703|MPCP_CHOFU	Phosphate carrier protein, mitochondrial OS=Choristoneura fumiferana OX=7141 PE=2 SV=1	0	78.771	100
P_KWMTBOMO14761		tr|H9J2S8|H9J2S8_BOMMO	Dihydrolipoyllysine-residue succinyltransferase component of 2-oxoglutarate dehydrogenase complex, mitochondrial OS=Bombyx mori OX=7091 PE=3 SV=1	0	78.71	100		sp|P11179|ODO2_BOVIN	Dihydrolipoyllysine-residue succinyltransferase component of 2-oxoglutarate dehydrogenase complex, mitochondrial OS=Bos taurus OX=9913 GN=DLST PE=1 SV=2	8.56e-150	56.542	92.043
P_KWMTBOMO14845		tr|Q1HQC8|Q1HQC8_BOMMO	ARP1 actin-related protein 1-like protein A OS=Bombyx mori OX=7091 GN=732868 PE=2 SV=1	0	100	100		sp|P61162|ACTZ_CANLF	Alpha-centractin OS=Canis lupus familiaris OX=9615 GN=ACTR1A PE=2 SV=1	0	81.649	100
P_KWMTBOMO14887		tr|H9JRM2|H9JRM2_BOMMO	T-complex protein 1 subunit eta OS=Bombyx mori OX=7091 PE=3 SV=1	0	99.631	100		sp|Q5ZJK8|TCPH_CHICK	T-complex protein 1 subunit eta OS=Gallus gallus OX=9031 GN=CCT7 PE=1 SV=1	0	69.376	97.6015
P_KWMTBOMO14942		tr|H9IU76|H9IU76_BOMMO	AMP deaminase OS=Bombyx mori OX=7091 PE=3 SV=1	0	98.229	97.6064		sp|Q02356|AMPD2_RAT	AMP deaminase 2 OS=Rattus norvegicus OX=10116 GN=Ampd2 PE=1 SV=2	0	59.916	95.2128
P_KWMTBOMO15060		tr|H9J5R2|H9J5R2_BOMMO	Protein transport protein SEC23 OS=Bombyx mori OX=7091 PE=3 SV=1	0	100	100		sp|Q01405|SC23A_MOUSE	Protein transport protein Sec23A OS=Mus musculus OX=10090 GN=Sec23a PE=1 SV=2	0	74.583	100
P_KWMTBOMO15121		tr|Q0N2R8|Q0N2R8_BOMMO	Signal recognition particle 54 kDa protein OS=Bombyx mori OX=7091 GN=SRP54 PE=2 SV=1	0	99.601	100		sp|Q7ZVN5|SRP54_DANRE	Signal recognition particle 54 kDa protein OS=Danio rerio OX=7955 GN=srp54 PE=2 SV=1	0	80.2	99.8004
P_KWMTBOMO15125		tr|H9J651|H9J651_BOMMO	Adipocyte plasma membrane-associated protein OS=Bombyx mori OX=7091 PE=3 SV=1	0	99.398	94.3262		sp|Q5ZIF1|APMAP_CHICK	Adipocyte plasma membrane-associated protein OS=Gallus gallus OX=9031 GN=APMAP PE=2 SV=1	2.85e-45	32.203	50.2128
P_KWMTBOMO15179		tr|G9I6Y0|G9I6Y0_BOMMO	RING-type E3 ubiquitin transferase OS=Bombyx mori OX=7091 GN=100862840 PE=2 SV=1	0	85.632	100		sp|Q803I8|SYVN1_DANRE	E3 ubiquitin-protein ligase synoviolin OS=Danio rerio OX=7955 GN=syvn1 PE=2 SV=2	3.34e-177	67.761	64.1762
P_KWMTBOMO15198		tr|B5AU20|B5AU20_BOMMO	UDP-glucuronosyltransferase OS=Bombyx mori OX=7091 GN=UGT2 PE=2 SV=1	0	100	100		sp|A0A291PQH4|UGT2_DACCO	UDP-glucosyltransferase 2 OS=Dactylopius coccus OX=765876 GN=UTG2 PE=1 SV=1	2.31e-59	29.352	94.0952
P_KWMTBOMO15243		tr|H9J673|H9J673_BOMMO	Uncharacterized protein OS=Bombyx mori OX=7091 PE=3 SV=1	0	94.172	100		sp|Q6NRP2|PSME4_XENLA	Proteasome activator complex subunit 4 OS=Xenopus laevis OX=8355 GN=psme4 PE=2 SV=1	0	34.078	81.6997
P_KWMTBOMO15357		tr|H9J6H5|H9J6H5_BOMMO	Prolyl-tRNA synthetase OS=Bombyx mori OX=7091 PE=3 SV=1	0	98.315	99.6403		sp|P28668|SYEP_DROME	Bifunctional glutamate/proline--tRNA ligase OS=Drosophila melanogaster OX=7227 GN=GluProRS PE=1 SV=2	0	61.306	99.1607
P_KWMTBOMO15361		tr|O16143|O16143_BOMMO	Rab1 protein OS=Bombyx mori OX=7091 GN=rabB PE=2 SV=1	5.31e-153	100	100		sp|Q05974|RAB1A_LYMST	Ras-related protein Rab-1A OS=Lymnaea stagnalis OX=6523 GN=RAB1A PE=2 SV=1	4.74e-124	81.188	100
P_KWMTBOMO15365		tr|B0FRJ4|B0FRJ4_BOMMO	Fibroin heavy chain Fib-h (Fragment) OS=Bombyx mori OX=7091 PE=4 SV=1	4.87e-120	99.351	2.94399		sp|Q99050|FIBH_BOMMA	Fibroin heavy chain (Fragment) OS=Bombyx mandarina OX=7092 GN=FIBH PE=2 SV=2	5.97e-138	97.765	3.42191
P_KWMTBOMO15407		tr|Q1HQA9|Q1HQA9_BOMMO	Transmembrane trafficking protein OS=Bombyx mori OX=7091 GN=733098 PE=2 SV=1	1.47e-154	100	100		sp|B3LVB0|TMEDA_DROAN	Transmembrane emp24 domain-containing protein bai OS=Drosophila ananassae OX=7217 GN=bai PE=3 SV=1	6.57e-105	69.5	97.561
P_KWMTBOMO15419		tr|H9J5I6|H9J5I6_BOMMO	Methyltransf_25 domain-containing protein OS=Bombyx mori OX=7091 PE=4 SV=1	0	100	99.1573		sp|Q6PAK3|ANM8_MOUSE	Protein arginine N-methyltransferase 8 OS=Mus musculus OX=10090 GN=Prmt8 PE=1 SV=2	0	71.988	93.2584
P_KWMTBOMO15518		tr|Q1HPL0|Q1HPL0_BOMMO	26S proteasome regulatory ATPase subunit 10B OS=Bombyx mori OX=7091 PE=2 SV=1	0	100	100		sp|P62334|PRS10_MOUSE	26S proteasome regulatory subunit 10B OS=Mus musculus OX=10090 GN=Psmc6 PE=1 SV=1	0	88.571	97.2222
P_KWMTBOMO15547		tr|H9JMI6|H9JMI6_BOMMO	Nop domain-containing protein OS=Bombyx mori OX=7091 PE=3 SV=1	0	91.939	99.3506		sp|O00567|NOP56_HUMAN	Nucleolar protein 56 OS=Homo sapiens OX=9606 GN=NOP56 PE=1 SV=4	0	66.59	93.9394
P_KWMTBOMO15665		tr|H9IYF4|H9IYF4_BOMMO	Uncharacterized protein OS=Bombyx mori OX=7091 GN=101736745 PE=4 SV=1	0	100	100		sp|P26305|LPSBP_PERAM	Hemolymph lipopolysaccharide-binding protein OS=Periplaneta americana OX=6978 PE=1 SV=1	3.37e-26	39.716	45.1923
P_KWMTBOMO15675		tr|H9IYG1|H9IYG1_BOMMO	Uncharacterized protein OS=Bombyx mori OX=7091 PE=4 SV=1	0	100	56.6038		sp|Q2M296|MTHSD_HUMAN	Methenyltetrahydrofolate synthase domain-containing protein OS=Homo sapiens OX=9606 GN=MTHFSD PE=1 SV=2	5.55e-81	40.212	79.2453
P_KWMTBOMO15712		tr|Q2F5N9|Q2F5N9_BOMMO	Nucleoplasmin isoform 2 OS=Bombyx mori OX=7091 GN=692956 PE=2 SV=1	7.05e-137	100	100		sp|Q27415|NLP_DROME	Nucleoplasmin-like protein OS=Drosophila melanogaster OX=7227 GN=Nlp PE=1 SV=1	2.34e-29	48.148	57.754
P_KWMTBOMO15757		tr|B3VBE3|B3VBE3_BOMMO	Vacuolar proton pump subunit B OS=Bombyx mori OX=7091 PE=2 SV=1	5.34e-157	100	100		sp|P31401|VATB_MANSE	V-type proton ATPase subunit B OS=Manduca sexta OX=7130 GN=VHA55 PE=2 SV=1	2.9e-155	99.526	100
P_KWMTBOMO15781		tr|H9IYL2|H9IYL2_BOMMO	Uncharacterized protein OS=Bombyx mori OX=7091 PE=3 SV=2	0	87.5	100		sp|O46036|CTBP_DROME	C-terminal-binding protein OS=Drosophila melanogaster OX=7227 GN=CtBP PE=1 SV=3	0	91.643	78.9011
P_KWMTBOMO16000		tr|A0A1Q0AL85|A0A1Q0AL85_BOMMO	Homeostasis protein OS=Bombyx mori OX=7091 GN=IHoP PE=2 SV=1	0	100	100		sp|Q61233|PLSL_MOUSE	Plastin-2 OS=Mus musculus OX=10090 GN=Lcp1 PE=1 SV=4	0	51.823	91.0534
P_KWMTBOMO16197		tr|Q1HPX4|Q1HPX4_BOMMO	ATP synthase subunit gamma OS=Bombyx mori OX=7091 GN=732965 PE=2 SV=1	0	100	100		sp|O01666|ATPG_DROME	ATP synthase subunit gamma, mitochondrial OS=Drosophila melanogaster OX=7227 GN=ATPsyngamma PE=2 SV=2	2.51e-151	73.05	95.2703
P_KWMTBOMO16204		tr|H9JWQ7|H9JWQ7_BOMMO	CHK domain-containing protein OS=Bombyx mori OX=7091 GN=101744771 PE=4 SV=1	0	100	100		--	--	--	--	--
P_KWMTBOMO16261		tr|Q2F6A0|Q2F6A0_BOMMO	Exuperantia OS=Bombyx mori OX=7091 PE=2 SV=1	0	100	100		sp|Q24747|EXU_DROVI	Maternal protein exuperantia OS=Drosophila virilis OX=7244 GN=exu PE=3 SV=1	5.4e-82	39.231	94.431
P_KWMTBOMO16319		tr|Q2F5K7|Q2F5K7_BOMMO	Receptor expression-enhancing protein OS=Bombyx mori OX=7091 PE=2 SV=1	3.16e-130	99.429	100		sp|Q29RM3|REEP5_BOVIN	Receptor expression-enhancing protein 5 OS=Bos taurus OX=9913 GN=REEP5 PE=2 SV=1	3.07e-59	50.595	96
P_KWMTBOMO16375		tr|H9JW87|H9JW87_BOMMO	Uncharacterized protein OS=Bombyx mori OX=7091 PE=3 SV=1	3.73e-150	100	93.6937		sp|Q5XGW6|CHM4B_XENLA	Charged multivesicular body protein 4b OS=Xenopus laevis OX=8355 GN=chmp4b PE=2 SV=1	3.62e-77	62.054	100
P_KWMTBOMO16481		tr|Q19KB8|Q19KB8_BOMMO	Ras-related GTP-binding protein Rab11 OS=Bombyx mori OX=7091 GN=733063 PE=2 SV=1	1.33e-160	100	100		sp|P62492|RB11A_MOUSE	Ras-related protein Rab-11A OS=Mus musculus OX=10090 GN=Rab11a PE=1 SV=3	7.02e-129	82.326	100
P_KWMTBOMO16600		tr|H9J1F3|H9J1F3_BOMMO	acidPPc domain-containing protein OS=Bombyx mori OX=7091 PE=4 SV=1	1.7e-144	99.502	93.0556		sp|Q66H88|PLPP6_RAT	Phospholipid phosphatase 6 OS=Rattus norvegicus OX=10116 GN=Plpp6 PE=2 SV=1	1.53e-18	35.754	82.8704

## Sheet: unique PIPs of fibL at M4
Name	Bombyx-mori	Subject ID	Description	e-value	identity(%)	coverage(%)	Metazoa	Subject ID	Description	e-value	identity(%)	coverage(%)
P_KWMTBOMO00339		tr|H9ITE6|H9ITE6_BOMMO	CSD_1 domain-containing protein OS=Bombyx mori OX=7091 PE=4 SV=1	0	100	100		sp|P41824|YBOXH_APLCA	Y-box factor homolog OS=Aplysia californica OX=6500 PE=2 SV=1	1.24e-50	69.106	47.4903
P_KWMTBOMO00437		tr|H9IU13|H9IU13_BOMMO	PHB domain-containing protein OS=Bombyx mori OX=7091 PE=3 SV=1	0	100	98.8263		sp|O61491|FLOT1_DROME	Flotillin-1 OS=Drosophila melanogaster OX=7227 GN=Flo1 PE=2 SV=1	0	83.059	99.7653
P_KWMTBOMO00497		tr|H9JRZ9|H9JRZ9_BOMMO	Uncharacterized protein OS=Bombyx mori OX=7091 PE=3 SV=1	0	100	100		sp|Q60HD7|SERA_MACFA	D-3-phosphoglycerate dehydrogenase OS=Macaca fascicularis OX=9541 GN=PHGDH PE=2 SV=4	2.42e-109	50.814	93.8838
P_KWMTBOMO00545		tr|A7LBQ0|A7LBQ0_BOMMO	L-lactate dehydrogenase OS=Bombyx mori OX=7091 GN=LDH PE=2 SV=1	0	100	95.6647		sp|Q95028|LDH_DROME	L-lactate dehydrogenase OS=Drosophila melanogaster OX=7227 GN=Ldh PE=2 SV=1	1.96e-164	65.964	95.9538
P_KWMTBOMO00638		tr|D2Y4R4|D2Y4R4_BOMMO	Coatomer subunit beta' OS=Bombyx mori OX=7091 GN=COPB2 PE=2 SV=1	0	99.877	99.2692		sp|O62621|COPB2_DROME	Coatomer subunit beta' OS=Drosophila melanogaster OX=7227 GN=beta'COP PE=2 SV=2	0	71.059	98.9038
P_KWMTBOMO00687		tr|H9J134|H9J134_BOMMO	Nucleolar GTP-binding protein 1 OS=Bombyx mori OX=7091 PE=4 SV=1	0	93.029	64.5963		sp|Q9V411|NOG1_DROME	Nucleolar GTP-binding protein 1 OS=Drosophila melanogaster OX=7227 GN=Non1 PE=2 SV=1	0	68.666	100
P_KWMTBOMO00834		tr|H9JJI4|H9JJI4_BOMMO	RRM domain-containing protein OS=Bombyx mori OX=7091 GN=101746268 PE=4 SV=1	0	100	100		--	--	--	--	--
P_KWMTBOMO00881		tr|D4QF47|D4QF47_BOMMO	Ced-6 protein OS=Bombyx mori OX=7091 GN=ced-6 PE=2 SV=1	0	100	100		sp|Q7JUY7|CED6_DROME	PTB domain-containing adapter protein ced-6 OS=Drosophila melanogaster OX=7227 GN=ced-6 PE=1 SV=1	3.82e-84	39.463	94.347
P_KWMTBOMO01320		tr|H9JH84|H9JH84_BOMMO	Uncharacterized protein OS=Bombyx mori OX=7091 PE=3 SV=1	3.35e-146	100	100		sp|P46222|RL11_DROME	60S ribosomal protein L11 OS=Drosophila melanogaster OX=7227 GN=RpL11 PE=1 SV=2	4.44e-121	91.011	91.2821
P_KWMTBOMO01502		tr|Q5CCJ4|Q5CCJ4_BOMMO	Glutathione S-transferase sigma OS=Bombyx mori OX=7091 GN=GST sigma PE=1 SV=1	3.95e-152	100	100		sp|P46429|GST2_MANSE	Glutathione S-transferase 2 OS=Manduca sexta OX=7130 GN=GST2 PE=2 SV=1	8.62e-95	66.176	100
P_KWMTBOMO01918		tr|Q2F5L5|Q2F5L5_BOMMO	Protein transport protein Sec61 subunit beta OS=Bombyx mori OX=7091 GN=733070 PE=2 SV=1	1.66e-65	100	100		sp|P60467|SC61B_CANLF	Protein transport protein Sec61 subunit beta OS=Canis lupus familiaris OX=9615 GN=SEC61B PE=1 SV=2	2.67e-41	71.277	96.9072
P_KWMTBOMO01927		sp|P21894|SYAC_BOMMO	Alanine--tRNA ligase, cytoplasmic OS=Bombyx mori OX=7091 PE=1 SV=1	0	99.276	100		sp|P21894|SYAC_BOMMO	Alanine--tRNA ligase, cytoplasmic OS=Bombyx mori OX=7091 PE=1 SV=1	0	99.276	100
P_KWMTBOMO02059		tr|Q5UAM4|Q5UAM4_BOMMO	40S ribosomal protein S18 OS=Bombyx mori OX=7091 GN=RpS18 PE=2 SV=1	1.29e-111	100	100		sp|Q962R1|RS18_SPOFR	40S ribosomal protein S18 OS=Spodoptera frugiperda OX=7108 GN=RpS18 PE=2 SV=1	1.23e-110	99.342	100
P_KWMTBOMO02061		tr|Q1HPU7|Q1HPU7_BOMMO	Adenosylhomocysteinase OS=Bombyx mori OX=7091 PE=2 SV=1	0	100	100		sp|O76757|SAHH_ANOGA	Adenosylhomocysteinase OS=Anopheles gambiae OX=7165 GN=Ahcy13 PE=2 SV=2	0	80.233	100
P_KWMTBOMO02431		tr|Q1HQ25|Q1HQ25_BOMMO	ATP synthase subunit OS=Bombyx mori OX=7091 GN=732934 PE=2 SV=1	2.04e-70	100	100		sp|Q5RFH0|ATP5L_PONAB	ATP synthase subunit g, mitochondrial OS=Pongo abelii OX=9601 GN=ATP5MG PE=3 SV=1	1.02e-32	52.632	95.9596
P_KWMTBOMO02748		tr|H9J2I1|H9J2I1_BOMMO	TLC domain-containing protein OS=Bombyx mori OX=7091 GN=101745731 PE=3 SV=1	0	100	100		sp|Q6DED0|TR1L1_XENLA	Translocating chain-associated membrane protein 1-like 1 OS=Xenopus laevis OX=8355 GN=tram1l1 PE=2 SV=1	1.09e-74	35.979	100
P_KWMTBOMO02840		sp|Q2F5R8|EIF3E_BOMMO	Eukaryotic translation initiation factor 3 subunit E OS=Bombyx mori OX=7091 GN=eIF3-S6 PE=2 SV=1	0	100	100		sp|Q2F5R8|EIF3E_BOMMO	Eukaryotic translation initiation factor 3 subunit E OS=Bombyx mori OX=7091 GN=eIF3-S6 PE=2 SV=1	0	100	100
P_KWMTBOMO02857		tr|O17508|O17508_BOMMO	Cdc2-related kinase OS=Bombyx mori OX=7091 PE=2 SV=1	0	100	100		sp|Q3UMM4|CDK10_MOUSE	Cyclin-dependent kinase 10 OS=Mus musculus OX=10090 GN=Cdk10 PE=1 SV=1	1.53e-171	69.486	81.9307
P_KWMTBOMO03005		tr|H9J271|H9J271_BOMMO	Elongation factor 1-alpha OS=Bombyx mori OX=7091 GN=EF1a PE=2 SV=1	0	100	100		sp|P29520|EF1A_BOMMO	Elongation factor 1-alpha OS=Bombyx mori OX=7091 PE=2 SV=1	0	99.784	100
P_KWMTBOMO03122		tr|L8B3Q2|L8B3Q2_BOMMO	Kinesin-like protein OS=Bombyx mori OX=7091 GN=MCAK PE=2 SV=1	0	100	100		sp|Q960Z0|KI10A_DROME	Kinesin-like protein Klp10A OS=Drosophila melanogaster OX=7227 GN=Klp10A PE=1 SV=1	0	62.086	82.1769
P_KWMTBOMO03169		tr|Q17201|Q17201_BOMMO	Bmsqd-2 OS=Bombyx mori OX=7091 PE=2 SV=1	0	99.34	100		sp|Q08473|SQD_DROME	RNA-binding protein squid OS=Drosophila melanogaster OX=7227 GN=sqd PE=1 SV=3	4.44e-100	72.683	67.6568
P_KWMTBOMO03173		tr|Q1HPV7|Q1HPV7_BOMMO	Histone H2A OS=Bombyx mori OX=7091 GN=h2a.z PE=2 SV=1	1.2e-88	100	100		sp|Q6Y237|H2AV_PAGMA	Histone H2A.V OS=Pagrus major OX=143350 GN=h2az2 PE=2 SV=3	3.37e-81	97.561	95.3488
P_KWMTBOMO03314		tr|Q5UAS3|Q5UAS3_BOMMO	Ribosomal protein L15 OS=Bombyx mori OX=7091 GN=RpL15 PE=2 SV=1	2.87e-148	100	100		sp|P30736|RL15_CHITE	60S ribosomal protein L15 OS=Chironomus tentans OX=7153 GN=RpL15 PE=3 SV=3	3.13e-122	80.392	100
P_KWMTBOMO03337		tr|H9JA60|H9JA60_BOMMO	Uncharacterized protein OS=Bombyx mori OX=7091 PE=4 SV=1	0	98.697	96.8454		sp|P21522|ROA1_SCHAM	Heterogeneous nuclear ribonucleoprotein A1, A2/B1 homolog OS=Schistocerca americana OX=7009 GN=HNRNP PE=2 SV=1	1.83e-91	74.857	55.205
P_KWMTBOMO03550		tr|H9J9U5|H9J9U5_BOMMO	Chromo domain-containing protein OS=Bombyx mori OX=7091 PE=4 SV=1	1.41e-72	82.09	51.145		sp|Q13185|CBX3_HUMAN	Chromobox protein homolog 3 OS=Homo sapiens OX=9606 GN=CBX3 PE=1 SV=4	2.25e-36	46.309	56.8702
P_KWMTBOMO03601		tr|S5RN30|S5RN30_BOMMO	Farnesoic acid O-methyltransferase OS=Bombyx mori OX=7091 GN=FaMeT6-1 PE=2 SV=1	6.39e-110	100	100		sp|Q66S13|NATT4_THANI	Natterin-4 OS=Thalassophryne nattereri OX=289382 PE=2 SV=1	5.91e-07	31.061	89.7959
P_KWMTBOMO03630		tr|H9J9R7|H9J9R7_BOMMO	Uncharacterized protein OS=Bombyx mori OX=7091 PE=4 SV=1	2.53e-122	74.359	44.1748		sp|Q7TMK9|HNRPQ_MOUSE	Heterogeneous nuclear ribonucleoprotein Q OS=Mus musculus OX=10090 GN=Syncrip PE=1 SV=2	1.08e-179	55.031	78.8026
P_KWMTBOMO03631		tr|H9J9Y8|H9J9Y8_BOMMO	ER membrane protein complex subunit 1 OS=Bombyx mori OX=7091 PE=3 SV=1	0	100	93.1485		sp|Q5ZL00|EMC1_CHICK	ER membrane protein complex subunit 1 OS=Gallus gallus OX=9031 GN=EMC1 PE=2 SV=1	5.23e-32	32.143	45.677
P_KWMTBOMO03748		tr|Q2F645|Q2F645_BOMMO	Transketolase OS=Bombyx mori OX=7091 PE=2 SV=1	0	100	100		sp|Q9D4D4|TKTL2_MOUSE	Transketolase-like protein 2 OS=Mus musculus OX=10090 GN=Tktl2 PE=1 SV=1	0	62.153	98.5531
P_KWMTBOMO04505		tr|H9J7F7|H9J7F7_BOMMO	Zinc-hook domain-containing protein OS=Bombyx mori OX=7091 PE=3 SV=1	0	99.3	85.5432		sp|Q9W252|RAD50_DROME	DNA repair protein RAD50 OS=Drosophila melanogaster OX=7227 GN=rad50 PE=2 SV=4	1.59e-155	31.037	100
P_KWMTBOMO04691		tr|Q5TLD1|Q5TLD1_BOMMO	Replication protein A small subunit OS=Bombyx mori OX=7091 GN=BmRPA3 PE=2 SV=1	2.98e-98	100	100		--	--	--	--	--
P_KWMTBOMO05068		tr|Q5UAR4|Q5UAR4_BOMMO	Ribosomal protein L24 OS=Bombyx mori OX=7091 GN=RpL24 PE=2 SV=1	2.43e-111	100	100		sp|Q6F444|RL24_PLUXY	60S ribosomal protein L24 OS=Plutella xylostella OX=51655 GN=RpL24 PE=2 SV=1	1.72e-90	95.484	100
P_KWMTBOMO05572		tr|H9JAP3|H9JAP3_BOMMO	Uncharacterized protein OS=Bombyx mori OX=7091 PE=4 SV=1	6.08e-168	76.435	54.1735		sp|B4KID9|PESC_DROMO	Pescadillo homolog OS=Drosophila mojavensis OX=7230 GN=GI18209 PE=3 SV=1	0	52.674	100
P_KWMTBOMO05631		tr|H9JAK7|H9JAK7_BOMMO	Protein kinase domain-containing protein OS=Bombyx mori OX=7091 PE=4 SV=1	0	94.696	90.0281		sp|Q1ECX4|TLK2_DANRE	Serine/threonine-protein kinase tousled-like 2 OS=Danio rerio OX=7955 GN=tlk2 PE=2 SV=2	0	52.639	100
P_KWMTBOMO05675		tr|Q5UAR5|Q5UAR5_BOMMO	Ribosomal protein L23A OS=Bombyx mori OX=7091 GN=RpL23A PE=2 SV=1	0	100	100		sp|P62752|RL23A_RAT	60S ribosomal protein L23a OS=Rattus norvegicus OX=10116 GN=Rpl23a PE=2 SV=1	8.65e-62	76.19	35.7955
P_KWMTBOMO05680		tr|H9JBF1|H9JBF1_BOMMO	VWFC domain-containing protein OS=Bombyx mori OX=7091 PE=4 SV=1	0	97.473	98.9241		--	--	--	--	--
P_KWMTBOMO05687		tr|A8R081|A8R081_BOMMO	Bombyx homolog of P-element somatic inhibitor OS=Bombyx mori OX=7091 GN=BmPSI PE=2 SV=1	1.37e-12	23.754	27.5222		sp|Q00341|VIGLN_HUMAN	Vigilin OS=Homo sapiens OX=9606 GN=HDLBP PE=1 SV=2	0	49.197	100
P_KWMTBOMO05700		tr|H9JBG4|H9JBG4_BOMMO	Complex I-ESSS OS=Bombyx mori OX=7091 GN=101739775 PE=3 SV=1	8.39e-108	100	100		sp|O09111|NDUBB_MOUSE	NADH dehydrogenase [ubiquinone] 1 beta subcomplex subunit 11, mitochondrial OS=Mus musculus OX=10090 GN=Ndufb11 PE=1 SV=2	1.76e-13	30.216	97.2028
P_KWMTBOMO05723		tr|Q5UAM7|Q5UAM7_BOMMO	Ribosomal protein S15A OS=Bombyx mori OX=7091 GN=RpS15A PE=2 SV=1	5.26e-94	100	100		sp|Q6XIM8|RS15A_DROYA	40S ribosomal protein S15a OS=Drosophila yakuba OX=7245 GN=RpS15Aa PE=2 SV=3	3.84e-87	93.077	100
P_KWMTBOMO05979		tr|Q5UAT0|Q5UAT0_BOMMO	Ribosomal protein L10 OS=Bombyx mori OX=7091 GN=RpL10 PE=2 SV=1	7.89e-166	100	100		sp|O96647|RL10_BOMMA	60S ribosomal protein L10 OS=Bombyx mandarina OX=7092 GN=RpL10 PE=2 SV=1	2.91e-164	99.543	100
P_KWMTBOMO06076		tr|H9IWS8|H9IWS8_BOMMO	Thioredoxin domain-containing protein OS=Bombyx mori OX=7091 GN=101738690 PE=4 SV=1	8.04e-161	100	100		sp|Q9CQ79|TXND9_MOUSE	Thioredoxin domain-containing protein 9 OS=Mus musculus OX=10090 GN=Txndc9 PE=1 SV=1	8.67e-76	52.709	94.4186
P_KWMTBOMO06334		tr|D2WL76|D2WL76_BOMMO	Sericin 2 OS=Bombyx mori OX=7091 GN=Ser2 PE=4 SV=1	0	96.132	100		sp|Q25460|FP1_MYTED	Adhesive plaque matrix protein (Fragment) OS=Mytilus edulis OX=6550 GN=FP1 PE=1 SV=1	1.11e-56	36.364	41.0212
P_KWMTBOMO06373		tr|Q2F5L8|Q2F5L8_BOMMO	Ribonucloprotein OS=Bombyx mori OX=7091 PE=2 SV=1	8.53e-93	100	100		sp|Q5XH16|NH2L1_XENLA	NHP2-like protein 1 OS=Xenopus laevis OX=8355 GN=snu13 PE=2 SV=1	4.36e-77	81.89	97.6923
P_KWMTBOMO06621		tr|U3U9V0|U3U9V0_BOMMO	Uncharacterized protein OS=Bombyx mori OX=7091 PE=2 SV=1	0	100	100		sp|Q61686|CBX5_MOUSE	Chromobox protein homolog 5 OS=Mus musculus OX=10090 GN=Cbx5 PE=1 SV=1	1.39e-17	35.882	61.5942
P_KWMTBOMO06632		tr|H9JQ89|H9JQ89_BOMMO	Nucleoprotein TPR OS=Bombyx mori OX=7091 PE=3 SV=1	0	87.867	58.4199		sp|A1Z8P9|TPR_DROME	Nucleoprotein TPR OS=Drosophila melanogaster OX=7227 GN=Mtor PE=1 SV=1	0	31.858	100
P_KWMTBOMO06731		tr|H9JQE1|H9JQE1_BOMMO	Histone deacetylase OS=Bombyx mori OX=7091 PE=3 SV=1	0	91.686	89.648		sp|Q94517|HDAC1_DROME	Histone deacetylase HDAC1 OS=Drosophila melanogaster OX=7227 GN=HDAC1 PE=1 SV=2	0	92.634	92.7536
P_KWMTBOMO06760		tr|H9JRG6|H9JRG6_BOMMO	Eukaryotic translation initiation factor 3 subunit L OS=Bombyx mori OX=7091 PE=3 SV=1	0	100	98.3364		sp|Q16FL6|EIF3L_AEDAE	Eukaryotic translation initiation factor 3 subunit L OS=Aedes aegypti OX=7159 GN=AAEL009617 PE=3 SV=1	0	70.534	100
P_KWMTBOMO06803		tr|H9JR86|H9JR86_BOMMO	CP-type G domain-containing protein OS=Bombyx mori OX=7091 GN=101742911 PE=4 SV=1	0	100	100		sp|Q9W590|LSG1_DROME	Large subunit GTPase 1 homolog OS=Drosophila melanogaster OX=7227 GN=Ns3 PE=1 SV=1	5.32e-148	39.605	100
P_KWMTBOMO07076		tr|H9JLN4|H9JLN4_BOMMO	Uncharacterized protein OS=Bombyx mori OX=7091 PE=4 SV=1	0	99.76	80.0384		sp|Q28EW0|TM87A_XENTR	Transmembrane protein 87A OS=Xenopus tropicalis OX=8364 GN=tmem87a PE=2 SV=1	5.77e-124	39.051	100
P_KWMTBOMO07274		tr|A0A4P9D450|A0A4P9D450_BOMMO	Piwi OS=Bombyx mori OX=7091 PE=2 SV=1	0	100	100		sp|A8D8P8|SIWI_BOMMO	Piwi-like protein Siwi OS=Bombyx mori OX=7091 GN=Siwi PE=1 SV=1	0	100	100
P_KWMTBOMO07373		tr|H9J6N5|H9J6N5_BOMMO	Uncharacterized protein OS=Bombyx mori OX=7091 PE=4 SV=1	4.18e-97	100	100		sp|Q9U1N0|HRP65_CHITE	Hrp65 protein OS=Chironomus tentans OX=7153 GN=HRP65 PE=1 SV=1	6.32e-24	60.227	61.9718
P_KWMTBOMO07600		tr|Q1HPU6|Q1HPU6_BOMMO	Sec61p gamma subunit OS=Bombyx mori OX=7091 GN=733141 PE=2 SV=1	5.06e-45	100	100		sp|Q7Z1B8|S61G1_GRYOR	Protein transport protein Sec61 subunit gamma OS=Gryllotalpa orientalis OX=213494 GN=SEC61G PE=3 SV=1	3.67e-42	91.176	100
P_KWMTBOMO07679		tr|H9IVK1|H9IVK1_BOMMO	Uncharacterized protein OS=Bombyx mori OX=7091 PE=4 SV=1	0	99.634	39.738		sp|Q8TEQ6|GEMI5_HUMAN	Gem-associated protein 5 OS=Homo sapiens OX=9606 GN=GEMIN5 PE=1 SV=3	3.95e-26	26.185	58.3697
P_KWMTBOMO07688		tr|Q5UAP3|Q5UAP3_BOMMO	40S ribosomal protein S2 OS=Bombyx mori OX=7091 GN=RpS2 PE=2 SV=1	0	100	100		sp|P31009|RS2_DROME	40S ribosomal protein S2 OS=Drosophila melanogaster OX=7227 GN=RpS2 PE=1 SV=2	4.18e-144	90.278	82.7586
P_KWMTBOMO07780		tr|H9IUH3|H9IUH3_BOMMO	Eukaryotic translation initiation factor 3 subunit M OS=Bombyx mori OX=7091 GN=101737255 PE=3 SV=1	0	100	100		sp|Q17D30|EIF3M_AEDAE	Eukaryotic translation initiation factor 3 subunit M OS=Aedes aegypti OX=7159 GN=AAEL004347 PE=3 SV=1	0	72.798	100
P_KWMTBOMO07811		tr|H9IVE3|H9IVE3_BOMMO	RNA helicase OS=Bombyx mori OX=7091 GN=101746250 PE=4 SV=1	0	100	100		sp|O61305|DDX19_DROME	DEAD-box helicase Dbp80 OS=Drosophila melanogaster OX=7227 GN=Dbp80 PE=1 SV=1	0	70.652	98.9247
P_KWMTBOMO07930		tr|Q1HQ48|Q1HQ48_BOMMO	Mitochondrial single-stranded DNA-binding protein OS=Bombyx mori OX=7091 PE=2 SV=1	1.39e-108	99.324	100		sp|P54622|SSBP_DROME	Single-stranded DNA-binding protein, mitochondrial OS=Drosophila melanogaster OX=7227 GN=mtSSB PE=1 SV=2	2.56e-50	64.545	74.3243
P_KWMTBOMO07952		tr|H9IUR1|H9IUR1_BOMMO	Histidine--tRNA ligase OS=Bombyx mori OX=7091 PE=3 SV=1	0	66.062	100		sp|Q61035|HARS1_MOUSE	Histidine--tRNA ligase, cytoplasmic OS=Mus musculus OX=10090 GN=Hars1 PE=1 SV=2	0	67.683	95.534
P_KWMTBOMO08022		tr|H9IV52|H9IV52_BOMMO	Dsp protein OS=Bombyx mori OX=7091 GN=dsp PE=2 SV=1	0	100	71.3942		sp|Q24537|HMG2_DROME	High mobility group protein DSP1 OS=Drosophila melanogaster OX=7227 GN=Dsp1 PE=2 SV=1	1.07e-75	48.182	79.3269
P_KWMTBOMO08044		tr|H9IV44|H9IV44_BOMMO	DNA-(apurinic or apyrimidinic site) endonuclease OS=Bombyx mori OX=7091 GN=101739740 PE=3 SV=1	0	100	100		sp|P27864|RRP1_DROME	Recombination repair protein 1 OS=Drosophila melanogaster OX=7227 GN=Rrp1 PE=1 SV=2	6.85e-131	44.487	83.2278
P_KWMTBOMO08100		tr|Q5UAR8|Q5UAR8_BOMMO	60S ribosomal protein L21 OS=Bombyx mori OX=7091 GN=RpL21 PE=2 SV=1	1.42e-115	100	100		sp|P46778|RL21_HUMAN	60S ribosomal protein L21 OS=Homo sapiens OX=9606 GN=RPL21 PE=1 SV=2	2.69e-77	66.875	100
P_KWMTBOMO08194		tr|H9JIX2|H9JIX2_BOMMO	Uncharacterized protein OS=Bombyx mori OX=7091 PE=3 SV=1	1.35e-72	66.522	52.1542		sp|Q9VQ79|AIFM1_DROME	Putative apoptosis-inducing factor 1, mitochondrial OS=Drosophila melanogaster OX=7227 GN=AIF PE=2 SV=2	5.12e-60	35.423	72.3356
P_KWMTBOMO08201		tr|H9JIW6|H9JIW6_BOMMO	Glucosamine-6-phosphate isomerase OS=Bombyx mori OX=7091 GN=101746460 PE=3 SV=1	0	98.12	98.5185		sp|A4IHW6|GNPI2_XENTR	Glucosamine-6-phosphate isomerase 2 OS=Xenopus tropicalis OX=8364 GN=gnpda2 PE=2 SV=1	1.21e-159	75.281	98.8889
P_KWMTBOMO08213		tr|H9JIW2|H9JIW2_BOMMO	Uncharacterized protein OS=Bombyx mori OX=7091 GN=101746972 PE=4 SV=1	0	100	100		sp|P51610|HCFC1_HUMAN	Host cell factor 1 OS=Homo sapiens OX=9606 GN=HCFC1 PE=1 SV=2	0	71.99	45.5847
P_KWMTBOMO08535		tr|B3GQU6|B3GQU6_BOMMO	3-hydroxyisobutyrate dehydrogenase OS=Bombyx mori OX=7091 GN=Hibadh PE=2 SV=1	5.84e-10	25.126	78.3465		sp|Q7Q161|GLYR1_ANOGA	Putative oxidoreductase GLYR1 homolog OS=Anopheles gambiae OX=7165 GN=AGAP009949 PE=3 SV=5	2.16e-119	64.427	99.6063
P_KWMTBOMO08542		tr|H9JIM5|H9JIM5_BOMMO	Uncharacterized protein OS=Bombyx mori OX=7091 PE=3 SV=1	1.95e-83	99.167	46.6926		sp|Q9V447|KRH2_DROME	Krueppel homolog 2 OS=Drosophila melanogaster OX=7227 GN=Kr-h2 PE=1 SV=1	4.91e-83	50.628	92.9961
P_KWMTBOMO08642		tr|F8UN44|F8UN44_BOMMO	Heat shock protein 70-3 OS=Bombyx mori OX=7091 PE=2 SV=1	0	100	100		sp|P29844|BIP_DROME	Endoplasmic reticulum chaperone BiP OS=Drosophila melanogaster OX=7227 GN=Hsc70-3 PE=1 SV=2	0	89.708	99.3893
P_KWMTBOMO08652		tr|H9JDP0|H9JDP0_BOMMO	Diadenosine tetraphosphate synthetase OS=Bombyx mori OX=7091 PE=3 SV=1	0	100	100		sp|Q04451|SYG_BOMMO	Glycine--tRNA ligase OS=Bombyx mori OX=7091 PE=1 SV=2	0	99.118	100
P_KWMTBOMO08740		tr|H9JEF8|H9JEF8_BOMMO	UBR-type domain-containing protein OS=Bombyx mori OX=7091 PE=4 SV=1	0	99.168	55.8243		sp|Q9VLT5|POE_DROME	Protein purity of essence OS=Drosophila melanogaster OX=7227 GN=poe PE=1 SV=1	0	40.577	100
P_KWMTBOMO08776		sp|Q1HPW4|EIF3I_BOMMO	Eukaryotic translation initiation factor 3 subunit I OS=Bombyx mori OX=7091 PE=2 SV=1	0	100	100		sp|Q1HPW4|EIF3I_BOMMO	Eukaryotic translation initiation factor 3 subunit I OS=Bombyx mori OX=7091 PE=2 SV=1	0	100	100
P_KWMTBOMO08930		tr|H9JDX6|H9JDX6_BOMMO	S-formylglutathione hydrolase OS=Bombyx mori OX=7091 PE=3 SV=1	0	100	89.547		sp|Q9GJT2|ESTD_PIG	S-formylglutathione hydrolase OS=Sus scrofa OX=9823 GN=ESD PE=2 SV=1	1.95e-129	61.754	99.3031
P_KWMTBOMO08983		tr|Q5UAT2|Q5UAT2_BOMMO	60S ribosomal protein L8 OS=Bombyx mori OX=7091 GN=RpL8 PE=2 SV=1	0	100	100		sp|Q95V39|RL8_SPOFR	60S ribosomal protein L8 OS=Spodoptera frugiperda OX=7108 GN=RpL8 PE=2 SV=1	0	100	100
P_KWMTBOMO09000		tr|H9JE32|H9JE32_BOMMO	Uncharacterized protein OS=Bombyx mori OX=7091 PE=3 SV=1	2.27e-105	100	100		sp|P79382|MGST1_PIG	Microsomal glutathione S-transferase 1 OS=Sus scrofa OX=9823 GN=MGST1 PE=2 SV=3	3.61e-32	43.333	99.3377
P_KWMTBOMO09034		tr|H9JDJ7|H9JDJ7_BOMMO	RNA helicase OS=Bombyx mori OX=7091 PE=3 SV=1	0	96.038	74.2297		sp|P16381|DDX3L_MOUSE	Putative ATP-dependent RNA helicase Pl10 OS=Mus musculus OX=10090 GN=D1Pas1 PE=1 SV=1	0	56.444	94.5378
P_KWMTBOMO09050		tr|H9JDA0|H9JDA0_BOMMO	Uncharacterized protein OS=Bombyx mori OX=7091 PE=4 SV=1	0	100	92.7966		sp|Q96RQ3|MCCA_HUMAN	Methylcrotonoyl-CoA carboxylase subunit alpha, mitochondrial OS=Homo sapiens OX=9606 GN=MCCC1 PE=1 SV=3	0	56.278	95.6215
P_KWMTBOMO09054		tr|Q1HQ47|Q1HQ47_BOMMO	Isocitrate dehydrogenase [NADP] OS=Bombyx mori OX=7091 GN=100101164 PE=2 SV=1	0	100	100		sp|P33198|IDHP_PIG	Isocitrate dehydrogenase [NADP], mitochondrial (Fragment) OS=Sus scrofa OX=9823 GN=IDH2 PE=1 SV=1	0	71.325	95.4023
P_KWMTBOMO09300		tr|Q5UAU1|Q5UAU1_BOMMO	60S acidic ribosomal protein P0 OS=Bombyx mori OX=7091 GN=RpP0 PE=1 SV=1	0	100	100		sp|Q9U3U0|RLA0_CERCA	60S acidic ribosomal protein P0 OS=Ceratitis capitata OX=7213 GN=RpLP0 PE=3 SV=1	1.73e-177	81.388	100
P_KWMTBOMO09385		tr|H9JT97|H9JT97_BOMMO	TLDc domain-containing protein OS=Bombyx mori OX=7091 PE=4 SV=1	6.24e-121	98.235	34.9794		--	--	--	--	--
P_KWMTBOMO09390		tr|H9JU84|H9JU84_BOMMO	Splicing factor, arginine/serine-rich 1 OS=Bombyx mori OX=7091 PE=3 SV=1	6.24e-155	100	100		sp|Q6NYA0|SRS1B_DANRE	Serine/arginine-rich splicing factor 1B OS=Danio rerio OX=7955 GN=srsf1b PE=2 SV=1	3.58e-87	71.939	91.1628
P_KWMTBOMO09433		tr|H9JU67|H9JU67_BOMMO	Uncharacterized protein OS=Bombyx mori OX=7091 PE=3 SV=1	0	89.433	100		sp|A8JUV0|SBNO_DROME	Protein strawberry notch OS=Drosophila melanogaster OX=7227 GN=sno PE=1 SV=2	0	65.705	92.0354
P_KWMTBOMO09591		tr|H9JTH6|H9JTH6_BOMMO	Uncharacterized protein OS=Bombyx mori OX=7091 PE=3 SV=1	9.34e-169	100	55.2752		sp|O61492|FLOT2_DROME	Flotillin-2 OS=Drosophila melanogaster OX=7227 GN=Flo2 PE=2 SV=3	0	76.923	95.4128
P_KWMTBOMO09788		tr|Q2QEH2|Q2QEH2_BOMMO	Cellular retinoic acid binding protein OS=Bombyx mori OX=7091 GN=BmFABP1 PE=2 SV=1	1.36e-94	100	100		sp|C4N147|FABP1_DORPE	Sodium/calcium exchanger regulatory protein 1 OS=Doryteuthis pealeii OX=1051067 PE=1 SV=1	2.61e-37	46.4	94.697
P_KWMTBOMO09954		tr|H9JUM2|H9JUM2_BOMMO	Proline dehydrogenase OS=Bombyx mori OX=7091 PE=3 SV=1	0	100	58.6364		sp|Q04499|PROD_DROME	Proline dehydrogenase 1, mitochondrial OS=Drosophila melanogaster OX=7227 GN=slgA PE=2 SV=2	0	60.081	74.3939
P_KWMTBOMO09980		tr|Q1HPT4|Q1HPT4_BOMMO	14-3-3 epsilon OS=Bombyx mori OX=7091 PE=2 SV=1	0	100	100		sp|P92177|1433E_DROME	14-3-3 protein epsilon OS=Drosophila melanogaster OX=7227 GN=14-3-3epsilon PE=1 SV=2	4.71e-163	84.906	100
P_KWMTBOMO10056		tr|B5M9A0|B5M9A0_BOMMO	Myosin heavy chain (Fragment) OS=Bombyx mori OX=7091 PE=2 SV=1	0	55.179	26.9543		sp|Q99323|MYSN_DROME	Myosin heavy chain, non-muscle OS=Drosophila melanogaster OX=7227 GN=zip PE=1 SV=2	0	74.987	100
P_KWMTBOMO10128		tr|H9J806|H9J806_BOMMO	Uncharacterized protein OS=Bombyx mori OX=7091 PE=3 SV=1	1.66e-70	100	91.5888		sp|Q9W141|ATPK_DROME	Putative ATP synthase subunit f, mitochondrial OS=Drosophila melanogaster OX=7227 GN=ATPsynF PE=3 SV=1	7.4e-60	75.701	100
P_KWMTBOMO10169		tr|H9J7Y6|H9J7Y6_BOMMO	OMPdecase OS=Bombyx mori OX=7091 PE=3 SV=1	0	100	100		sp|Q01637|UMPS_DROME	Uridine 5'-monophosphate synthase OS=Drosophila melanogaster OX=7227 GN=r-l PE=2 SV=2	6.51e-172	50.924	100
P_KWMTBOMO10299		tr|H9JCL8|H9JCL8_BOMMO	Uncharacterized protein OS=Bombyx mori OX=7091 PE=4 SV=1	0	96.75	100		sp|Q9VLK2|Y3096_DROME	Ribosomal L1 domain-containing protein CG13096 OS=Drosophila melanogaster OX=7227 GN=CG13096 PE=1 SV=1	1.41e-35	33.197	62.8866
P_KWMTBOMO10376		tr|H9JC16|H9JC16_BOMMO	Pept_C1 domain-containing protein OS=Bombyx mori OX=7091 PE=3 SV=1	0	100	100		sp|P00787|CATB_RAT	Cathepsin B OS=Rattus norvegicus OX=10116 GN=Ctsb PE=1 SV=2	8.05e-140	58.333	99.7033
P_KWMTBOMO10509		tr|Q5UAR7|Q5UAR7_BOMMO	Ribosomal protein L22 OS=Bombyx mori OX=7091 GN=RpL22 PE=2 SV=1	1.07e-106	100	100		sp|P52819|RL22_CAEEL	60S ribosomal protein L22 OS=Caenorhabditis elegans OX=6239 GN=rpl-22 PE=1 SV=3	4.5e-38	49.254	91.1565
P_KWMTBOMO11083		tr|Q9BPS3|Q9BPS3_BOMMO	Elongation factor 1 gamma OS=Bombyx mori OX=7091 GN=ef-1g PE=2 SV=1	0	100	100		sp|P12261|EF1G_ARTSA	Elongation factor 1-gamma OS=Artemia salina OX=85549 PE=1 SV=3	0	65.741	100
P_KWMTBOMO11192		tr|C6L8Q2|C6L8Q2_BOMMO	Putative acetyl transferase OS=Bombyx mori OX=7091 GN=Bmat1 PE=2 SV=1	0	100	100		sp|P42765|THIM_HUMAN	3-ketoacyl-CoA thiolase, mitochondrial OS=Homo sapiens OX=9606 GN=ACAA2 PE=1 SV=2	5.87e-173	58.987	99.7475
P_KWMTBOMO11558		tr|Q2F5S1|Q2F5S1_BOMMO	Microtubule-associated protein RP/EB family member 3 OS=Bombyx mori OX=7091 PE=2 SV=1	0	100	100		sp|Q3ZBD9|MARE1_BOVIN	Microtubule-associated protein RP/EB family member 1 OS=Bos taurus OX=9913 GN=MAPRE1 PE=2 SV=3	2.38e-98	58.333	94.4882
P_KWMTBOMO11678		tr|Q5UAS7|Q5UAS7_BOMMO	60S ribosomal protein L12 OS=Bombyx mori OX=7091 GN=RpL12 PE=2 SV=1	1.46e-118	100	100		sp|P23358|RL12_RAT	60S ribosomal protein L12 OS=Rattus norvegicus OX=10116 GN=Rpl12 PE=2 SV=1	3.08e-96	81.25	97.561
P_KWMTBOMO11689		tr|H9J385|H9J385_BOMMO	Uncharacterized protein OS=Bombyx mori OX=7091 PE=4 SV=1	0	100	100		sp|O18373|SPS1_DROME	Inactive selenide, water dikinase-like protein OS=Drosophila melanogaster OX=7227 GN=SelD PE=2 SV=1	0	87.94	99.005
P_KWMTBOMO11731		sp|Q1HPK6|EF2_BOMMO	Translation elongation factor 2 OS=Bombyx mori OX=7091 GN=tef2 PE=1 SV=1	0	100	100		sp|Q1HPK6|EF2_BOMMO	Translation elongation factor 2 OS=Bombyx mori OX=7091 GN=tef2 PE=1 SV=1	0	100	100
P_KWMTBOMO11985		tr|Q5UAT4|Q5UAT4_BOMMO	Ribosomal protein L7 OS=Bombyx mori OX=7091 GN=RpL7 PE=2 SV=1	0	100	100		sp|P32100|RL7_DROME	60S ribosomal protein L7 OS=Drosophila melanogaster OX=7227 GN=RpL7 PE=1 SV=2	4.63e-117	66.667	92.5651
P_KWMTBOMO12037		tr|H9J470|H9J470_BOMMO	DEK_C domain-containing protein OS=Bombyx mori OX=7091 PE=4 SV=1	0	91.221	94.1532		sp|Q6AXS3|DEK_RAT	Protein DEK OS=Rattus norvegicus OX=10116 GN=Dek PE=1 SV=1	5.05e-20	47.368	19.1532
P_KWMTBOMO12057		tr|H9J463|H9J463_BOMMO	Eukaryotic translation initiation factor 2 subunit 1 OS=Bombyx mori OX=7091 GN=693063 PE=3 SV=1	0	100	100		sp|P41374|IF2A_DROME	Eukaryotic translation initiation factor 2 subunit 1 OS=Drosophila melanogaster OX=7227 GN=eIF2alpha PE=2 SV=1	2.35e-165	74.832	89.759
P_KWMTBOMO12165		tr|H9JWZ8|H9JWZ8_BOMMO	Glutathione synthase OS=Bombyx mori OX=7091 PE=3 SV=1	1.95e-169	99.565	52.9954		sp|P35668|GSHB_XENLA	Glutathione synthetase OS=Xenopus laevis OX=8355 GN=gss PE=2 SV=1	2.49e-108	43.564	93.0876
P_KWMTBOMO12208		tr|H9JE23|H9JE23_BOMMO	SAC domain-containing protein OS=Bombyx mori OX=7091 PE=4 SV=1	3.33e-156	100	35.9532		sp|Q9W0I6|SAC1_DROME	Phosphatidylinositol-3-phosphatase SAC1 OS=Drosophila melanogaster OX=7227 GN=Sac1 PE=2 SV=1	0	49.144	97.6589
P_KWMTBOMO12287		tr|Q5UAM2|Q5UAM2_BOMMO	40S ribosomal protein S20 OS=Bombyx mori OX=7091 GN=RpS20 PE=2 SV=1	3.74e-87	100	100		sp|P55828|RS20_DROME	40S ribosomal protein S20 OS=Drosophila melanogaster OX=7227 GN=RpS20 PE=1 SV=1	1.92e-68	83.74	100
P_KWMTBOMO12350		tr|H9JS78|H9JS78_BOMMO	DZF domain-containing protein OS=Bombyx mori OX=7091 PE=4 SV=1	0	95.423	86.7063		sp|Q5REX3|ZFR_PONAB	Zinc finger RNA-binding protein OS=Pongo abelii OX=9601 GN=ZFR PE=2 SV=1	0	38.139	100
P_KWMTBOMO12400		tr|H9JSB8|H9JSB8_BOMMO	RRM domain-containing protein OS=Bombyx mori OX=7091 PE=4 SV=1	7.88e-54	100	70		--	--	--	--	--
P_KWMTBOMO12483		tr|Q66SV9|Q66SV9_BOMMO	40S ribosomal protein S15 OS=Bombyx mori OX=7091 GN=S15 PE=2 SV=1	9.24e-107	100	100		sp|P62844|RS15_PIG	40S ribosomal protein S15 OS=Sus scrofa OX=9823 GN=RPS15 PE=1 SV=2	2.23e-77	81.633	100
P_KWMTBOMO12659		tr|H9IVX5|H9IVX5_BOMMO	T-complex protein 1 subunit gamma OS=Bombyx mori OX=7091 GN=101744569 PE=3 SV=1	0	100	100		sp|P48605|TCPG_DROME	T-complex protein 1 subunit gamma OS=Drosophila melanogaster OX=7227 GN=CCT3 PE=2 SV=2	0	81.041	99.6296
P_KWMTBOMO12895		tr|Q19AA9|Q19AA9_BOMMO	Transport protein Sec61 alpha subunit OS=Bombyx mori OX=7091 GN=733068 PE=2 SV=1	0	100	100		sp|Q9JLR1|S61A2_MOUSE	Protein transport protein Sec61 subunit alpha isoform 2 OS=Mus musculus OX=10090 GN=Sec61a2 PE=2 SV=3	0	91.597	100
P_KWMTBOMO12902		tr|H9IT95|H9IT95_BOMMO	Calreticulin OS=Bombyx mori OX=7091 PE=3 SV=1	0	100	100		sp|Q7Z1E6|CALR_BOMMO	Calreticulin OS=Bombyx mori OX=7091 GN=crt PE=1 SV=1	0	99.749	100
P_KWMTBOMO12903		tr|H9IT94|H9IT94_BOMMO	CP-type G domain-containing protein OS=Bombyx mori OX=7091 GN=101736688 PE=4 SV=1	0	100	100		sp|Q8MT06|GNL3_DROME	Guanine nucleotide-binding protein-like 3 homolog OS=Drosophila melanogaster OX=7227 GN=Ns1 PE=1 SV=2	4.41e-100	48.179	100
P_KWMTBOMO12968		tr|H9IT65|H9IT65_BOMMO	Uncharacterized protein OS=Bombyx mori OX=7091 PE=4 SV=1	0	89.312	35.0436		sp|A2BGM5|FOXN4_DANRE	Forkhead box protein N4 OS=Danio rerio OX=7955 GN=foxn4 PE=1 SV=1	4.74e-53	62	7.69625
P_KWMTBOMO13230		tr|H9JKC7|H9JKC7_BOMMO	LisH domain-containing protein OS=Bombyx mori OX=7091 PE=4 SV=2	4.71e-171	74.845	98.0213		sp|A4II09|EIF3A_XENTR	Eukaryotic translation initiation factor 3 subunit A OS=Xenopus tropicalis OX=8364 GN=eif3a PE=2 SV=1	1.65e-06	44.242	25.1142
P_KWMTBOMO13287		tr|H9J5C1|H9J5C1_BOMMO	RuvB-like helicase OS=Bombyx mori OX=7091 GN=101739823 PE=3 SV=1	0	100	100		sp|Q0IFL2|RUVB1_AEDAE	RuvB-like helicase 1 OS=Aedes aegypti OX=7159 GN=pont PE=3 SV=1	0	83.736	99.7807
P_KWMTBOMO13455		sp|Q5UAP0|RS4_BOMMO	40S ribosomal protein S4 OS=Bombyx mori OX=7091 GN=RpS4 PE=2 SV=1	0	100	100		sp|Q5UAP0|RS4_BOMMO	40S ribosomal protein S4 OS=Bombyx mori OX=7091 GN=RpS4 PE=2 SV=1	0	100	100
P_KWMTBOMO13567		tr|H9JN68|H9JN68_BOMMO	Uncharacterized protein OS=Bombyx mori OX=7091 PE=4 SV=1	0	100	61.1833		--	--	--	--	--
P_KWMTBOMO13569		tr|Q5UAR3|Q5UAR3_BOMMO	Ribosomal protein L26 OS=Bombyx mori OX=7091 GN=RpL26 PE=2 SV=1	7.52e-72	100	100		sp|Q95WA0|RL26_LITLI	60S ribosomal protein L26 OS=Littorina littorea OX=31216 GN=RPL26 PE=2 SV=1	1.9e-51	80.392	100
P_KWMTBOMO13641		tr|H9JND7|H9JND7_BOMMO	SMC_N domain-containing protein OS=Bombyx mori OX=7091 PE=4 SV=1	4.13e-107	100	69.0476		sp|O93309|SMC3_XENLA	Structural maintenance of chromosomes protein 3 OS=Xenopus laevis OX=8355 GN=smc3 PE=1 SV=2	5.93e-87	68.317	96.1905
P_KWMTBOMO13800		tr|H9JPL2|H9JPL2_BOMMO	60S ribosomal protein L18a OS=Bombyx mori OX=7091 PE=3 SV=1	4.32e-132	100	100		sp|Q8WQI7|RL18A_SPOFR	60S ribosomal protein L18a OS=Spodoptera frugiperda OX=7108 GN=RpL18A PE=2 SV=1	1.32e-126	95.48	100
P_KWMTBOMO13979		tr|Q2F646|Q2F646_BOMMO	Hairy cell leukemia protein 1 OS=Bombyx mori OX=7091 GN=693008 PE=2 SV=1	0	99.614	62.4096		sp|O95478|NSA2_HUMAN	Ribosome biogenesis protein NSA2 homolog OS=Homo sapiens OX=9606 GN=NSA2 PE=1 SV=1	9.59e-148	76.923	62.6506
P_KWMTBOMO13997		tr|Q6T9Z7|Q6T9Z7_BOMMO	Fibroinase OS=Bombyx mori OX=7091 GN=693031 PE=2 SV=1	0	100	100		sp|Q26636|CATL_SARPE	Cathepsin L OS=Sarcophaga peregrina OX=7386 PE=1 SV=1	6.18e-177	68.902	96.1877
P_KWMTBOMO14024		tr|H9JPA3|H9JPA3_BOMMO	DJ-1 beta OS=Bombyx mori OX=7091 GN=100422789 PE=2 SV=1	2.25e-138	100	100		sp|Q9VA37|DJ1B_DROME	Protein dj-1beta OS=Drosophila melanogaster OX=7227 GN=dj-1beta PE=1 SV=3	5.03e-67	54.787	98.9474
P_KWMTBOMO14420		tr|H9IS77|H9IS77_BOMMO	Uncharacterized protein OS=Bombyx mori OX=7091 GN=101744691 PE=4 SV=1	0	99.786	99.7861		sp|Q9BUJ2|HNRL1_HUMAN	Heterogeneous nuclear ribonucleoprotein U-like protein 1 OS=Homo sapiens OX=9606 GN=HNRNPUL1 PE=1 SV=2	7.54e-52	41.87	26.3102
P_KWMTBOMO14483		tr|H9IS46|H9IS46_BOMMO	Uncharacterized protein OS=Bombyx mori OX=7091 PE=4 SV=1	0	99.603	91.3043		sp|P25171|RCC1_DROME	Regulator of chromosome condensation OS=Drosophila melanogaster OX=7227 GN=Rcc1 PE=1 SV=2	7.43e-112	40.272	93.1159
P_KWMTBOMO14536		tr|H9JXM7|H9JXM7_BOMMO	Citrate synthase OS=Bombyx mori OX=7091 GN=101740166 PE=3 SV=1	0	99.425	32.0147		sp|Q91V92|ACLY_MOUSE	ATP-citrate synthase OS=Mus musculus OX=10090 GN=Acly PE=1 SV=1	0	61.187	100
P_KWMTBOMO14633		tr|H9JJ62|H9JJ62_BOMMO	Uncharacterized protein OS=Bombyx mori OX=7091 PE=3 SV=1	0	100	94.4251		sp|Q9H8M5|CNNM2_HUMAN	Metal transporter CNNM2 OS=Homo sapiens OX=9606 GN=CNNM2 PE=1 SV=2	2.48e-179	49.733	97.7352
P_KWMTBOMO14752		tr|H9J2U6|H9J2U6_BOMMO	PUA domain-containing protein OS=Bombyx mori OX=7091 GN=101744752 PE=3 SV=1	0	100	100		sp|O44081|DKC1_DROME	H/ACA ribonucleoprotein complex subunit 4 OS=Drosophila melanogaster OX=7227 GN=Nop60B PE=1 SV=1	0	76.69	91.4712
P_KWMTBOMO14804		tr|H9JRQ1|H9JRQ1_BOMMO	Programmed cell death protein 4 OS=Bombyx mori OX=7091 GN=101743674 PE=3 SV=1	0	100	59.1422		sp|Q98TX3|PDCD4_CHICK	Programmed cell death protein 4 OS=Gallus gallus OX=9031 GN=PDCD4 PE=2 SV=1	3.96e-92	43.371	100
P_KWMTBOMO14858		tr|H9JRJ9|H9JRJ9_BOMMO	Uncharacterized protein OS=Bombyx mori OX=7091 PE=4 SV=2	0	89.299	80.6381		sp|Q02645|HTS_DROME	Protein hu-li tai shao OS=Drosophila melanogaster OX=7227 GN=hts PE=1 SV=2	0	56.932	49.1661
P_KWMTBOMO14877		tr|Q0ZB80|Q0ZB80_BOMMO	eIF2B-beta protein OS=Bombyx mori OX=7091 PE=2 SV=1	0	99.717	100		sp|Q5E9B4|EI2BB_BOVIN	Translation initiation factor eIF-2B subunit beta OS=Bos taurus OX=9913 GN=EIF2B2 PE=2 SV=1	1.5e-63	36.676	98.8669
P_KWMTBOMO15159		tr|H9J5Z1|H9J5Z1_BOMMO	Uncharacterized protein OS=Bombyx mori OX=7091 PE=4 SV=1	0	97.685	99.3428		sp|Q99PL5|RRBP1_MOUSE	Ribosome-binding protein 1 OS=Mus musculus OX=10090 GN=Rrbp1 PE=1 SV=2	3.36e-17	27.524	67.2508
P_KWMTBOMO15176		tr|H9J5Z8|H9J5Z8_BOMMO	Uncharacterized protein OS=Bombyx mori OX=7091 GN=101745895 PE=4 SV=1	0	100	100		sp|Q86UA1|PRP39_HUMAN	Pre-mRNA-processing factor 39 OS=Homo sapiens OX=9606 GN=PRPF39 PE=1 SV=3	3.41e-142	39.835	65.2643
P_KWMTBOMO15419		tr|H9J5I6|H9J5I6_BOMMO	Methyltransf_25 domain-containing protein OS=Bombyx mori OX=7091 PE=4 SV=1	0	100	99.1573		sp|Q6PAK3|ANM8_MOUSE	Protein arginine N-methyltransferase 8 OS=Mus musculus OX=10090 GN=Prmt8 PE=1 SV=2	0	71.988	93.2584
P_KWMTBOMO15583		tr|D2Y4R2|D2Y4R2_BOMMO	Coatomer subunit alpha OS=Bombyx mori OX=7091 GN=COPA PE=2 SV=1	0	99.767	100		sp|Q27954|COPA_BOVIN	Coatomer subunit alpha OS=Bos taurus OX=9913 GN=COPA PE=1 SV=1	0	59.127	100
P_KWMTBOMO15592		tr|A3QVV0|A3QVV0_BOMMO	Small nuclear ribonucleoprotein Sm D2 OS=Bombyx mori OX=7091 PE=2 SV=1	1.84e-77	100	100		sp|Q9VI10|SMD2_DROME	Probable small nuclear ribonucleoprotein Sm D2 OS=Drosophila melanogaster OX=7227 GN=SmD2 PE=1 SV=1	9.05e-54	90.722	88.9908
P_KWMTBOMO15928		tr|Q0N2S4|Q0N2S4_BOMMO	Polyadenylate-binding protein OS=Bombyx mori OX=7091 GN=PAbp PE=2 SV=1	0	99.502	98.5294		sp|P11940|PABP1_HUMAN	Polyadenylate-binding protein 1 OS=Homo sapiens OX=9606 GN=PABPC1 PE=1 SV=2	0	68.454	100
P_KWMTBOMO16040		tr|H9J4W7|H9J4W7_BOMMO	Uncharacterized protein OS=Bombyx mori OX=7091 PE=3 SV=1	0	100	77.5641		sp|P42669|PURA_MOUSE	Transcriptional activator protein Pur-alpha OS=Mus musculus OX=10090 GN=Pura PE=1 SV=1	1.27e-77	50.213	75.3205
P_KWMTBOMO16637		tr|Q9GSB6|Q9GSB6_BOMMO	Heat shock protein hsp20.4 OS=Bombyx mori OX=7091 GN=Hsp20.4 PE=2 SV=2	5.98e-133	100	100		sp|P82147|L2EFL_DROME	Protein lethal(2)essential for life OS=Drosophila melanogaster OX=7227 GN=l(2)efl PE=1 SV=1	8.44e-55	50.568	97.2376

## Sheet: unique PIPs of fibL at L5D5
Name	Bombyx-mori	Subject ID	Description	e-value	identity(%)	coverage(%)	Metazoa	Subject ID	Description	e-value	identity(%)	coverage(%)
P_KWMTBOMO00279		tr|H9ITU2|H9ITU2_BOMMO	Citrate synthase OS=Bombyx mori OX=7091 GN=101737646 PE=3 SV=1	0	100	100		sp|Q16P20|CISY2_AEDAE	Probable citrate synthase 2, mitochondrial OS=Aedes aegypti OX=7159 GN=AAEL011789 PE=3 SV=1	0	81.075	100
P_KWMTBOMO00373		tr|H9ITY4|H9ITY4_BOMMO	Aa_trans domain-containing protein OS=Bombyx mori OX=7091 GN=101746014 PE=4 SV=1	0	100	100		sp|Q9VT04|PATH_DROME	Proton-coupled amino acid transporter-like protein pathetic OS=Drosophila melanogaster OX=7227 GN=path PE=1 SV=1	6.88e-175	56.182	99.3534
P_KWMTBOMO00375		tr|H9ITY5|H9ITY5_BOMMO	Uncharacterized protein OS=Bombyx mori OX=7091 PE=3 SV=1	0	87.972	100		sp|Q9VSA3|ACADM_DROME	Probable medium-chain specific acyl-CoA dehydrogenase, mitochondrial OS=Drosophila melanogaster OX=7227 GN=CG12262 PE=2 SV=1	0	73.558	98.3452
P_KWMTBOMO00390		tr|H9ITC4|H9ITC4_BOMMO	Uncharacterized protein OS=Bombyx mori OX=7091 PE=4 SV=1	0	100	79.562		--	--	--	--	--
P_KWMTBOMO00473		tr|Q1HPX8|Q1HPX8_BOMMO	6-phosphogluconate dehydrogenase, decarboxylating OS=Bombyx mori OX=7091 PE=2 SV=1	0	100	100		sp|P52209|6PGD_HUMAN	6-phosphogluconate dehydrogenase, decarboxylating OS=Homo sapiens OX=9606 GN=PGD PE=1 SV=3	0	73.542	99.3789
P_KWMTBOMO00722		tr|A0A0D6A6H2|A0A0D6A6H2_BOMMO	Methionine--tRNA ligase, cytoplasmic OS=Bombyx mori OX=7091 GN=BmMRS PE=2 SV=1	0	100	100		sp|Q6PF21|SYMC_XENLA	Methionine--tRNA ligase, cytoplasmic OS=Xenopus laevis OX=8355 GN=mars1 PE=2 SV=1	0	46.816	89.4106
P_KWMTBOMO00837		tr|H9JJI3|H9JJI3_BOMMO	Proteasome subunit beta OS=Bombyx mori OX=7091 PE=3 SV=1	0	100	97.3282		sp|P99026|PSB4_MOUSE	Proteasome subunit beta type-4 OS=Mus musculus OX=10090 GN=Psmb4 PE=1 SV=1	1.89e-88	49.799	95.0382
P_KWMTBOMO00973		--	--	--	--	--		--	--	--	--	--
P_KWMTBOMO00982		tr|H9IVS2|H9IVS2_BOMMO	Uncharacterized protein OS=Bombyx mori OX=7091 PE=4 SV=1	9.8e-180	100	48.7129		sp|Q9D0F3|LMAN1_MOUSE	Protein ERGIC-53 OS=Mus musculus OX=10090 GN=Lman1 PE=1 SV=1	1.46e-138	44.353	96.4356
P_KWMTBOMO01420		tr|H9JHG2|H9JHG2_BOMMO	Complex I-SGDH OS=Bombyx mori OX=7091 PE=3 SV=1	4.71e-146	100	100		sp|Q0MQD8|NDUB5_PANTR	NADH dehydrogenase [ubiquinone] 1 beta subcomplex subunit 5, mitochondrial OS=Pan troglodytes OX=9598 GN=NDUFB5 PE=2 SV=1	5.4e-31	42.857	66.3158
P_KWMTBOMO01423		tr|H9JHG0|H9JHG0_BOMMO	NADH-ubiquinone oxidoreductase 75 kDa subunit, mitochondrial OS=Bombyx mori OX=7091 PE=3 SV=1	0	98.518	100		sp|Q94511|NDUS1_DROME	NADH-ubiquinone oxidoreductase 75 kDa subunit, mitochondrial OS=Drosophila melanogaster OX=7227 GN=ND-75 PE=2 SV=3	0	64.393	100
P_KWMTBOMO01431		tr|H9JHF8|H9JHF8_BOMMO	Voltage-dependent anion-selective channel protein 3 OS=Bombyx mori OX=7091 GN=101739703 PE=3 SV=1	5.89e-131	100	100		sp|Q94920|VDAC_DROME	Voltage-dependent anion-selective channel OS=Drosophila melanogaster OX=7227 GN=porin PE=1 SV=3	8.71e-82	60.656	100
P_KWMTBOMO01438		tr|H9JHC9|H9JHC9_BOMMO	U-box domain-containing protein OS=Bombyx mori OX=7091 PE=3 SV=1	0	99.029	97.9398		sp|Q9ES00|UBE4B_MOUSE	Ubiquitin conjugation factor E4 B OS=Mus musculus OX=10090 GN=Ube4b PE=1 SV=3	1.88e-46	30.886	73.3756
P_KWMTBOMO01452		tr|H9JHD3|H9JHD3_BOMMO	Arginyl-tRNA synthetase OS=Bombyx mori OX=7091 GN=101737924 PE=3 SV=1	0	100	100		sp|Q6P1S4|SYRC_XENTR	Arginine--tRNA ligase, cytoplasmic OS=Xenopus tropicalis OX=8364 GN=rars1 PE=2 SV=1	0	58.85	99.2679
P_KWMTBOMO01658		tr|H9J955|H9J955_BOMMO	Calcium channel flower OS=Bombyx mori OX=7091 PE=3 SV=1	2.66e-135	100	95.8115		sp|B3M9W1|FLOWR_DROAN	Calcium channel flower OS=Drosophila ananassae OX=7217 GN=flower PE=3 SV=2	4.16e-59	49.735	98.9529
P_KWMTBOMO01708		tr|H9J9C9|H9J9C9_BOMMO	Dynein light intermediate chain OS=Bombyx mori OX=7091 PE=3 SV=1	2.61e-111	99.367	34.0517		sp|Q6PDL0|DC1L2_MOUSE	Cytoplasmic dynein 1 light intermediate chain 2 OS=Mus musculus OX=10090 GN=Dync1li2 PE=1 SV=2	2.12e-142	50.33	98.0603
P_KWMTBOMO01806		tr|H9J9G9|H9J9G9_BOMMO	Cation-transporting ATPase OS=Bombyx mori OX=7091 GN=101743411 PE=3 SV=1	0	99.914	100		sp|Q9EPE9|AT131_MOUSE	Manganese-transporting ATPase 13A1 OS=Mus musculus OX=10090 GN=Atp13a1 PE=1 SV=2	0	57.252	100
P_KWMTBOMO01821		tr|H9J9H8|H9J9H8_BOMMO	Uncharacterized protein OS=Bombyx mori OX=7091 GN=101744329 PE=4 SV=1	0	100	89.2635		sp|Q5ZJP5|FND3A_CHICK	Fibronectin type-III domain-containing protein 3a OS=Gallus gallus OX=9031 GN=FNDC3A PE=2 SV=2	0	33.302	95.6522
P_KWMTBOMO02013		tr|H9J125|H9J125_BOMMO	26S proteasome non-ATPase regulatory subunit 6 OS=Bombyx mori OX=7091 GN=101735567 PE=3 SV=1	0	100	100		sp|Q15008|PSMD6_HUMAN	26S proteasome non-ATPase regulatory subunit 6 OS=Homo sapiens OX=9606 GN=PSMD6 PE=1 SV=1	5.45e-102	43.112	100
P_KWMTBOMO02088		tr|H9J0E7|H9J0E7_BOMMO	Lysine--tRNA ligase OS=Bombyx mori OX=7091 GN=101740883 PE=3 SV=1	0	100	100		sp|Q99MN1|SYK_MOUSE	Lysine--tRNA ligase OS=Mus musculus OX=10090 GN=Kars1 PE=1 SV=1	0	68.206	97.069
P_KWMTBOMO02223		tr|Q1HQC7|Q1HQC7_BOMMO	Aspartate aminotransferase OS=Bombyx mori OX=7091 PE=2 SV=1	0	99.768	100		sp|P00507|AATM_RAT	Aspartate aminotransferase, mitochondrial OS=Rattus norvegicus OX=10116 GN=Got2 PE=1 SV=2	0	62.06	92.3434
P_KWMTBOMO02278		sp|Q75VN3|TCTP_BOMMO	Translationally-controlled tumor protein homolog OS=Bombyx mori OX=7091 GN=Tctp PE=2 SV=1	8.85e-126	100	100		sp|Q75VN3|TCTP_BOMMO	Translationally-controlled tumor protein homolog OS=Bombyx mori OX=7091 GN=Tctp PE=2 SV=1	5.77e-125	100	100
P_KWMTBOMO02354		tr|H9JXZ9|H9JXZ9_BOMMO	Uncharacterized protein OS=Bombyx mori OX=7091 PE=4 SV=1	0	97.674	41.28		sp|P45953|ACADV_RAT	Very long-chain specific acyl-CoA dehydrogenase, mitochondrial OS=Rattus norvegicus OX=10116 GN=Acadvl PE=1 SV=1	0	56.689	95.68
P_KWMTBOMO02392		sp|B9VJ80|UBA5_BOMMO	Ubiquitin-like modifier-activating enzyme 5 OS=Bombyx mori OX=7091 PE=2 SV=1	0	99.237	100		sp|B9VJ80|UBA5_BOMMO	Ubiquitin-like modifier-activating enzyme 5 OS=Bombyx mori OX=7091 PE=2 SV=1	0	99.237	100
P_KWMTBOMO02535		tr|H9IZB1|H9IZB1_BOMMO	Uncharacterized protein OS=Bombyx mori OX=7091 PE=4 SV=1	0	96.875	70.1269		sp|O08730|GLYG_RAT	Glycogenin-1 OS=Rattus norvegicus OX=10116 GN=Gyg1 PE=2 SV=4	3.47e-117	52.395	38.5236
P_KWMTBOMO02542		tr|Q8T7L8|Q8T7L8_BOMMO	Seroin 1 OS=Bombyx mori OX=7091 PE=2 SV=1	7.09e-73	97.222	100		--	--	--	--	--
P_KWMTBOMO02836		tr|H9J1Y2|H9J1Y2_BOMMO	Uncharacterized protein OS=Bombyx mori OX=7091 PE=3 SV=1	7.22e-124	90	100		sp|P55326|YZG1_CAEEL	Uncharacterized protein F13E6.1 OS=Caenorhabditis elegans OX=6239 GN=F13E6.1 PE=3 SV=2	1.51e-19	35.032	84.4086
P_KWMTBOMO03002		tr|Q587N3|Q587N3_BOMMO	Protein disulfide-isomerase OS=Bombyx mori OX=7091 GN=erp57 PE=2 SV=1	0	100	100		sp|Q8JG64|PDIA3_CHICK	Protein disulfide-isomerase A3 OS=Gallus gallus OX=9031 GN=PDIA3 PE=2 SV=1	4.56e-149	50.644	94.9084
P_KWMTBOMO03003		tr|H9J272|H9J272_BOMMO	Adenylate kinase isoenzyme 6 homolog OS=Bombyx mori OX=7091 GN=101735934 PE=3 SV=1	2.6e-133	100	100		sp|Q7JYV7|KAD6_DROME	Adenylate kinase isoenzyme 6 homolog OS=Drosophila melanogaster OX=7227 GN=Ak6 PE=1 SV=1	3.13e-69	57.317	93.7143
P_KWMTBOMO03027		tr|Q2F5M6|Q2F5M6_BOMMO	Ras small monomeric GTPase Rab6 OS=Bombyx mori OX=7091 PE=2 SV=1	1.13e-158	100	100		sp|O18334|RAB6_DROME	Ras-related protein Rab6 OS=Drosophila melanogaster OX=7227 GN=Rab6 PE=1 SV=1	2.75e-141	90.338	99.0431
P_KWMTBOMO03301		tr|E0D4V7|E0D4V7_BOMMO	Phenylalanyl-tRNA synthetase beta subunit OS=Bombyx mori OX=7091 GN=FRSB PE=2 SV=1	0	100	100		sp|Q9VCA5|SYFB_DROME	Phenylalanine--tRNA ligase beta subunit OS=Drosophila melanogaster OX=7227 GN=beta-PheRS PE=1 SV=1	0	66.893	100
P_KWMTBOMO03311		tr|H9JAB8|H9JAB8_BOMMO	RRM domain-containing protein OS=Bombyx mori OX=7091 PE=4 SV=1	0	100	100		sp|P23588|IF4B_HUMAN	Eukaryotic translation initiation factor 4B OS=Homo sapiens OX=9606 GN=EIF4B PE=1 SV=2	2.09e-33	35.971	77.7985
P_KWMTBOMO03622		tr|H9J9Y4|H9J9Y4_BOMMO	ADP-ribosylation factor-like protein 6-interacting protein 4 OS=Bombyx mori OX=7091 GN=101742090 PE=3 SV=1	8.34e-108	100	98.1481		sp|Q5F4A9|AR6P4_CHICK	ADP-ribosylation factor-like protein 6-interacting protein 4 OS=Gallus gallus OX=9031 GN=ARL6IP4 PE=2 SV=1	4.3e-31	76.119	41.358
P_KWMTBOMO04051		tr|H9JL88|H9JL88_BOMMO	UDPGT domain-containing protein OS=Bombyx mori OX=7091 PE=3 SV=1	0	95.709	99.9003		sp|A0A291PQH4|UGT2_DACCO	UDP-glucosyltransferase 2 OS=Dactylopius coccus OX=765876 GN=UTG2 PE=1 SV=1	6.72e-74	31.836	51.0469
P_KWMTBOMO04057		tr|G9LPU0|G9LPU0_BOMMO	UDP-glucuronosyltransferase OS=Bombyx mori OX=7091 GN=UGT40A1 PE=2 SV=1	0	100	100		sp|A0A291PQH4|UGT2_DACCO	UDP-glucosyltransferase 2 OS=Dactylopius coccus OX=765876 GN=UTG2 PE=1 SV=1	1.37e-77	32.544	97.5
P_KWMTBOMO04170		tr|H9JGS8|H9JGS8_BOMMO	UTP--glucose-1-phosphate uridylyltransferase OS=Bombyx mori OX=7091 PE=3 SV=1	0	100	97.8558		sp|Q07130|UGPA_BOVIN	UTP--glucose-1-phosphate uridylyltransferase OS=Bos taurus OX=9913 GN=UGP2 PE=1 SV=2	0	65.737	97.8558
P_KWMTBOMO04330		tr|H9JX71|H9JX71_BOMMO	PCI domain-containing protein OS=Bombyx mori OX=7091 GN=101735320 PE=3 SV=1	0	100	100		sp|Q7KLV9|PSD11_DROME	26S proteasome non-ATPase regulatory subunit 11 OS=Drosophila melanogaster OX=7227 GN=Rpn6 PE=1 SV=1	0	76.54	100
P_KWMTBOMO04424		tr|H9J7A0|H9J7A0_BOMMO	PA28_alpha domain-containing protein OS=Bombyx mori OX=7091 PE=4 SV=1	3.58e-90	99.225	52.439		sp|Q5F3J5|PSME3_CHICK	Proteasome activator complex subunit 3 OS=Gallus gallus OX=9031 GN=PSME3 PE=1 SV=1	5.95e-92	50.201	100
P_KWMTBOMO04427		tr|H9J7B7|H9J7B7_BOMMO	Signal recognition particle receptor subunit beta OS=Bombyx mori OX=7091 PE=3 SV=1	0	100	100		sp|Q9Y5M8|SRPRB_HUMAN	Signal recognition particle receptor subunit beta OS=Homo sapiens OX=9606 GN=SRPRB PE=1 SV=3	2.92e-59	46.575	87.6
P_KWMTBOMO04469		tr|Q5TLD2|Q5TLD2_BOMMO	Replication protein A middle subunit OS=Bombyx mori OX=7091 GN=BmRPA2 PE=2 SV=1	0	100	100		sp|Q63528|RFA2_RAT	Replication protein A 32 kDa subunit OS=Rattus norvegicus OX=10116 GN=Rpa2 PE=2 SV=2	1.69e-31	29.963	100
P_KWMTBOMO04584		tr|Q2F5K1|Q2F5K1_BOMMO	Signal sequence receptor subunit gamma OS=Bombyx mori OX=7091 PE=2 SV=1	1.07e-132	100	100		sp|Q9UNL2|SSRG_HUMAN	Translocon-associated protein subunit gamma OS=Homo sapiens OX=9606 GN=SSR3 PE=1 SV=1	8e-87	64.865	100
P_KWMTBOMO04594		tr|Q1HE02|Q1HE02_BOMMO	ALY OS=Bombyx mori OX=7091 GN=733049 PE=2 SV=1	0	100	100		sp|Q58EA2|THO4A_XENLA	THO complex subunit 4-A OS=Xenopus laevis OX=8355 GN=alyref-a PE=2 SV=1	3.73e-51	49.237	100
P_KWMTBOMO04674		tr|Q1HQ86|Q1HQ86_BOMMO	Mobility group protein 1B OS=Bombyx mori OX=7091 GN=100101161 PE=2 SV=1	3.17e-78	100	100		sp|Q06943|HMGZ_DROME	High mobility group protein Z OS=Drosophila melanogaster OX=7227 GN=HmgZ PE=1 SV=1	5.24e-33	66.234	64.7059
P_KWMTBOMO04737		tr|H9JK23|H9JK23_BOMMO	Carboxylic ester hydrolase OS=Bombyx mori OX=7091 PE=3 SV=1	0	99.538	95.585		sp|B2D0J5|EST6_APIME	Venom carboxylesterase-6 OS=Apis mellifera OX=7460 PE=2 SV=1	1.76e-118	41.256	98.4547
P_KWMTBOMO04906		tr|H9JEW9|H9JEW9_BOMMO	Aminopeptidase N-8 OS=Bombyx mori OX=7091 GN=101737565 PE=2 SV=1	0	98.024	92.4201		sp|P15145|AMPN_PIG	Aminopeptidase N OS=Sus scrofa OX=9823 GN=ANPEP PE=1 SV=4	9.3e-128	32.057	76.347
P_KWMTBOMO04966		tr|E5EVW5|E5EVW5_BOMMO	Inorganic diphosphatase OS=Bombyx mori OX=7091 PE=3 SV=1	0	100	86.2275		sp|O77460|IPYR_DROME	Inorganic pyrophosphatase OS=Drosophila melanogaster OX=7227 GN=Nurf-38 PE=1 SV=3	1.04e-129	58.389	89.2216
P_KWMTBOMO04992		tr|H9JEZ8|H9JEZ8_BOMMO	Uncharacterized protein OS=Bombyx mori OX=7091 PE=3 SV=1	0	99.614	100		sp|Q21929|DCXR_CAEEL	L-xylulose reductase OS=Caenorhabditis elegans OX=6239 GN=dhs-21 PE=1 SV=2	5.68e-38	33.597	97.6834
P_KWMTBOMO05078		tr|Q2F5L1|Q2F5L1_BOMMO	Signal peptidase complex catalytic subunit SEC11 OS=Bombyx mori OX=7091 PE=2 SV=1	3.67e-131	99.438	100		sp|Q9D8V7|SC11C_MOUSE	Signal peptidase complex catalytic subunit SEC11C OS=Mus musculus OX=10090 GN=Sec11c PE=1 SV=3	1.2e-103	79.429	98.3146
P_KWMTBOMO05113		tr|H9JSJ4|H9JSJ4_BOMMO	Uncharacterized protein OS=Bombyx mori OX=7091 PE=4 SV=1	0	100	100		sp|P38659|PDIA4_RAT	Protein disulfide-isomerase A4 OS=Rattus norvegicus OX=10116 GN=Pdia4 PE=1 SV=2	2.64e-09	23.81	66.6667
P_KWMTBOMO05178		tr|Q2F5M8|Q2F5M8_BOMMO	Phosphoserine aminotransferase OS=Bombyx mori OX=7091 PE=2 SV=1	0	100	100		sp|Q9VAN0|SERC_DROME	Probable phosphoserine aminotransferase OS=Drosophila melanogaster OX=7227 GN=CG11899 PE=2 SV=1	9.9e-147	64.935	96.8553
P_KWMTBOMO05205		tr|H9IYX7|H9IYX7_BOMMO	5-aminoimidazole-4-carboxamide ribonucleotide formyltransferase OS=Bombyx mori OX=7091 PE=3 SV=1	0	100	98.8156		sp|P31335|PUR9_CHICK	Bifunctional purine biosynthesis protein ATIC OS=Gallus gallus OX=9031 GN=ATIC PE=1 SV=1	0	68.855	100
P_KWMTBOMO05281		tr|H9IZ19|H9IZ19_BOMMO	Uncharacterized protein OS=Bombyx mori OX=7091 GN=101735890 PE=3 SV=1	4.73e-144	100	100		sp|Q9CQC9|SAR1B_MOUSE	GTP-binding protein SAR1b OS=Mus musculus OX=10090 GN=Sar1b PE=1 SV=1	9.93e-107	75	100
P_KWMTBOMO05299		tr|H9IYR7|H9IYR7_BOMMO	Uncharacterized protein OS=Bombyx mori OX=7091 PE=3 SV=1	0	96.091	98.0831		sp|O95749|GGPPS_HUMAN	Geranylgeranyl pyrophosphate synthase OS=Homo sapiens OX=9606 GN=GGPS1 PE=1 SV=1	5.33e-131	60.357	89.4569
P_KWMTBOMO05464		tr|H9JB09|H9JB09_BOMMO	Vasa intronic protein OS=Bombyx mori OX=7091 GN=101741313 PE=2 SV=1	0	100	100		sp|Q6AXS5|PAIRB_RAT	Plasminogen activator inhibitor 1 RNA-binding protein OS=Rattus norvegicus OX=10116 GN=Serbp1 PE=1 SV=2	1.23e-20	40.625	41.1311
P_KWMTBOMO05699		tr|H9JBD3|H9JBD3_BOMMO	RNA-splicing ligase RtcB homolog OS=Bombyx mori OX=7091 GN=101739631 PE=3 SV=1	0	100	100		sp|Q9VIW7|RTCB_DROME	RNA-splicing ligase RtcB homolog OS=Drosophila melanogaster OX=7227 GN=RtcB PE=2 SV=1	0	88.34	100
P_KWMTBOMO05810		tr|H9JBQ0|H9JBQ0_BOMMO	Uncharacterized protein OS=Bombyx mori OX=7091 PE=4 SV=1	0	99.381	50.3565		sp|Q8SWU7|OLA1_DROME	Obg-like ATPase 1 OS=Drosophila melanogaster OX=7227 GN=CG1354 PE=1 SV=1	4.43e-180	78.274	14.9733
P_KWMTBOMO05987		tr|A0FDQ5|A0FDQ5_BOMMO	Dolichyl-diphosphooligosaccharide--protein glycosyltransferase 48 kDa subunit OS=Bombyx mori OX=7091 PE=2 SV=1	0	99.541	100		sp|Q24319|OST48_DROME	Dolichyl-diphosphooligosaccharide--protein glycosyltransferase 48 kDa subunit OS=Drosophila melanogaster OX=7227 GN=Ost48 PE=2 SV=2	0	65.707	95.6422
P_KWMTBOMO05993		tr|H9IZY3|H9IZY3_BOMMO	Uncharacterized protein OS=Bombyx mori OX=7091 PE=3 SV=1	0	99.777	90.8907		sp|P91938|TRXR1_DROME	Thioredoxin reductase 1, mitochondrial OS=Drosophila melanogaster OX=7227 GN=Trxr-1 PE=1 SV=2	0	67.677	100
P_KWMTBOMO06045		tr|H9J005|H9J005_BOMMO	TOG domain-containing protein OS=Bombyx mori OX=7091 PE=3 SV=2	0	93.348	100		sp|E9PVA8|GCN1_MOUSE	eIF-2-alpha kinase activator GCN1 OS=Mus musculus OX=10090 GN=Gcn1 PE=1 SV=1	0	45.751	100
P_KWMTBOMO06228		tr|H9IWL1|H9IWL1_BOMMO	LITAF domain-containing protein OS=Bombyx mori OX=7091 PE=3 SV=1	1.49e-80	99.153	65.5556		--	--	--	--	--
P_KWMTBOMO06354		tr|H9JR23|H9JR23_BOMMO	Aminotran_1_2 domain-containing protein OS=Bombyx mori OX=7091 PE=4 SV=1	0	94.624	90.1163		sp|Q28DB5|ALAT2_XENTR	Alanine aminotransferase 2 OS=Xenopus tropicalis OX=8364 GN=gpt2 PE=2 SV=1	0	58.078	94.7674
P_KWMTBOMO06427		tr|Q2F5L0|Q2F5L0_BOMMO	Signal sequence receptor subunit alpha OS=Bombyx mori OX=7091 GN=778461 PE=2 SV=1	0	100	100		sp|P43307|SSRA_HUMAN	Translocon-associated protein subunit alpha OS=Homo sapiens OX=9606 GN=SSR1 PE=1 SV=3	6.17e-70	50.45	79.5699
P_KWMTBOMO06639		tr|Q2F5Q1|Q2F5Q1_BOMMO	Lysophospholipase OS=Bombyx mori OX=7091 PE=2 SV=1	6.85e-166	100	100		sp|Q3MHR0|LYPA1_BOVIN	Acyl-protein thioesterase 1 OS=Bos taurus OX=9913 GN=LYPLA1 PE=2 SV=1	6.45e-78	53.425	99.5455
P_KWMTBOMO06654		tr|A0FDQ0|A0FDQ0_BOMMO	Programmed cell death protein 5-like protein OS=Bombyx mori OX=7091 GN=778501 PE=2 SV=1	6.72e-92	100	100		sp|P56812|PDCD5_MOUSE	Programmed cell death protein 5 OS=Mus musculus OX=10090 GN=Pdcd5 PE=1 SV=3	6.66e-31	46.512	99.2308
P_KWMTBOMO06762		tr|H9JRG5|H9JRG5_BOMMO	Uncharacterized protein OS=Bombyx mori OX=7091 PE=4 SV=1	1.5e-169	100	100		sp|Q9BRJ6|CG050_HUMAN	Uncharacterized protein C7orf50 OS=Homo sapiens OX=9606 GN=C7orf50 PE=1 SV=1	5.26e-14	35.417	41.5584
P_KWMTBOMO07061		tr|H9JLP3|H9JLP3_BOMMO	Uncharacterized protein OS=Bombyx mori OX=7091 PE=3 SV=1	2.05e-51	100	50.3106		sp|Q5R979|PGM2L_PONAB	Glucose 1,6-bisphosphate synthase OS=Pongo abelii OX=9601 GN=PGM2L1 PE=2 SV=1	4.81e-32	37.5	99.3789
P_KWMTBOMO07103		tr|Q2F5P8|Q2F5P8_BOMMO	Malate dehydrogenase OS=Bombyx mori OX=7091 PE=2 SV=1	0	100	100		sp|O88989|MDHC_RAT	Malate dehydrogenase, cytoplasmic OS=Rattus norvegicus OX=10116 GN=Mdh1 PE=1 SV=3	7.95e-157	65.653	99.3958
P_KWMTBOMO07205		tr|H9JLI0|H9JLI0_BOMMO	Uncharacterized protein OS=Bombyx mori OX=7091 PE=3 SV=1	0	98.254	100		sp|Q24179|SLY1_DROME	Protein sly1 homolog OS=Drosophila melanogaster OX=7227 GN=Slh PE=2 SV=4	0	62.813	100
P_KWMTBOMO07214		tr|D5MTP2|D5MTP2_BOMMO	Bm8 interacting protein 2-11 OS=Bombyx mori OX=7091 PE=2 SV=1	0	94.898	78.8204		sp|Q9VMA7|TGO1_DROME	Transport and Golgi organization protein 1 OS=Drosophila melanogaster OX=7227 GN=Tango1 PE=1 SV=2	6.97e-56	30.097	48.3244
P_KWMTBOMO07368		tr|H9JMD1|H9JMD1_BOMMO	Uncharacterized protein OS=Bombyx mori OX=7091 GN=101744608 PE=3 SV=1	8.23e-94	100	100		sp|P24310|CX7A1_HUMAN	Cytochrome c oxidase subunit 7A1, mitochondrial OS=Homo sapiens OX=9606 GN=COX7A1 PE=1 SV=2	3.33e-12	47.458	45.3846
P_KWMTBOMO07722		tr|H9IVI5|H9IVI5_BOMMO	Eukaryotic translation initiation factor 5B OS=Bombyx mori OX=7091 PE=4 SV=1	2.43e-114	98.802	82.6733		sp|Q05D44|IF2P_MOUSE	Eukaryotic translation initiation factor 5B OS=Mus musculus OX=10090 GN=Eif5b PE=1 SV=2	4.35e-111	76.238	100
P_KWMTBOMO07723		tr|H9IVI5|H9IVI5_BOMMO	Eukaryotic translation initiation factor 5B OS=Bombyx mori OX=7091 PE=4 SV=1	0	96.413	100		sp|O60841|IF2P_HUMAN	Eukaryotic translation initiation factor 5B OS=Homo sapiens OX=9606 GN=EIF5B PE=1 SV=4	1.08e-159	65.746	39.3478
P_KWMTBOMO07761		tr|H9IUG4|H9IUG4_BOMMO	Uncharacterized protein OS=Bombyx mori OX=7091 PE=4 SV=1	0	94.605	26.4072		sp|Q8MSS1|LVA_DROME	Protein lava lamp OS=Drosophila melanogaster OX=7227 GN=lva PE=1 SV=2	5.58e-15	35.644	7.01876
P_KWMTBOMO07821		tr|H9IUJ6|H9IUJ6_BOMMO	Transaldolase OS=Bombyx mori OX=7091 PE=3 SV=1	0	100	100		sp|Q2TBL6|TALDO_BOVIN	Transaldolase OS=Bos taurus OX=9913 GN=TALDO1 PE=2 SV=1	4.86e-159	68.598	98.7952
P_KWMTBOMO08040		tr|H9IUV5|H9IUV5_BOMMO	Inosine-5'-monophosphate dehydrogenase OS=Bombyx mori OX=7091 GN=101740233 PE=3 SV=1	0	100	100		sp|Q07152|IMDH_DROME	Inosine-5'-monophosphate dehydrogenase OS=Drosophila melanogaster OX=7227 GN=ras PE=1 SV=1	0	79.093	99.0234
P_KWMTBOMO08045		tr|H9IUV7|H9IUV7_BOMMO	Leucyl-tRNA synthetase OS=Bombyx mori OX=7091 PE=3 SV=1	0	99.658	99.2072		sp|Q9P2J5|SYLC_HUMAN	Leucine--tRNA ligase, cytoplasmic OS=Homo sapiens OX=9606 GN=LARS1 PE=1 SV=2	0	65.984	99.547
P_KWMTBOMO08056		tr|H9IV39|H9IV39_BOMMO	Rab GDP dissociation inhibitor OS=Bombyx mori OX=7091 GN=101738804 PE=3 SV=1	0	100	100		sp|P21856|GDIA_BOVIN	Rab GDP dissociation inhibitor alpha OS=Bos taurus OX=9913 GN=GDI1 PE=1 SV=1	0	68.75	100
P_KWMTBOMO08098		tr|G9FL14|G9FL14_BOMMO	DNA supercoiling factor OS=Bombyx mori OX=7091 GN=LOC692759 PE=2 SV=1	1.98e-48	100	100		sp|B5X4E0|CALUB_SALSA	Calumenin-B OS=Salmo salar OX=8030 GN=calub PE=2 SV=1	7.32e-13	49.333	100
P_KWMTBOMO08204		tr|H9JIZ5|H9JIZ5_BOMMO	Arf-GAP domain-containing protein OS=Bombyx mori OX=7091 GN=101746692 PE=4 SV=1	0	100	100		sp|Q28CM8|ARFG2_XENTR	ADP-ribosylation factor GTPase-activating protein 2 OS=Xenopus tropicalis OX=8364 GN=arfgap2 PE=2 SV=1	1.27e-99	39.455	100
P_KWMTBOMO08343		tr|H9JI86|H9JI86_BOMMO	Uncharacterized protein OS=Bombyx mori OX=7091 PE=4 SV=1	0	100	71.519		sp|P54802|ANAG_HUMAN	Alpha-N-acetylglucosaminidase OS=Homo sapiens OX=9606 GN=NAGLU PE=1 SV=2	2.63e-165	41.81	67.616
P_KWMTBOMO08503		tr|H9JIK9|H9JIK9_BOMMO	Mitochondrial DNA polymerase catalytic subunit OS=Bombyx mori OX=7091 PE=3 SV=1	0	100	96.6825		sp|Q9BXS5|AP1M1_HUMAN	AP-1 complex subunit mu-1 OS=Homo sapiens OX=9606 GN=AP1M1 PE=1 SV=3	0	84.123	100
P_KWMTBOMO08584		tr|H9JDK7|H9JDK7_BOMMO	Uncharacterized protein OS=Bombyx mori OX=7091 PE=4 SV=1	0	99.913	57.4937		sp|O15027|SC16A_HUMAN	Protein transport protein Sec16A OS=Homo sapiens OX=9606 GN=SEC16A PE=1 SV=4	3.13e-60	34.081	22.3559
P_KWMTBOMO08596		tr|H9JEM4|H9JEM4_BOMMO	Uncharacterized protein OS=Bombyx mori OX=7091 PE=3 SV=1	1.43e-162	100	97.6959		sp|Q7SXP0|S22BB_DANRE	Vesicle-trafficking protein SEC22b-B OS=Danio rerio OX=7955 GN=sec22bb PE=2 SV=1	4.44e-87	56.621	100
P_KWMTBOMO08655		tr|Q2F649|Q2F649_BOMMO	Surfeit 4-like protein OS=Bombyx mori OX=7091 PE=2 SV=1	0	100	100		sp|O18405|SURF4_DROME	Surfeit locus protein 4 homolog OS=Drosophila melanogaster OX=7227 GN=Surf4 PE=2 SV=1	2.43e-168	81.852	100
P_KWMTBOMO08707		tr|H9JDR8|H9JDR8_BOMMO	Elongator complex protein 3 OS=Bombyx mori OX=7091 PE=3 SV=1	0	99.66	82.4684		sp|Q5ZHS1|ELP3_CHICK	Elongator complex protein 3 OS=Gallus gallus OX=9031 GN=ELP3 PE=2 SV=1	0	84.962	74.6143
P_KWMTBOMO08773		tr|H9JDU2|H9JDU2_BOMMO	TROVE domain-containing protein OS=Bombyx mori OX=7091 PE=3 SV=1	0	96.22	100		sp|P42700|RO60_XENLA	60 kDa SS-A/Ro ribonucleoprotein OS=Xenopus laevis OX=8355 GN=ro60 PE=1 SV=1	6.33e-37	24.324	99.0551
P_KWMTBOMO08894		tr|Q5UAN9|Q5UAN9_BOMMO	Ribosomal protein S5 OS=Bombyx mori OX=7091 GN=RpS5 PE=2 SV=1	3.62e-166	100	100		sp|P46782|RS5_HUMAN	40S ribosomal protein S5 OS=Homo sapiens OX=9606 GN=RPS5 PE=1 SV=4	1.84e-134	91.327	89.4977
P_KWMTBOMO09183		tr|H9J1H4|H9J1H4_BOMMO	Uncharacterized protein OS=Bombyx mori OX=7091 PE=4 SV=1	0	99.804	46.6179		sp|O00410|IPO5_HUMAN	Importin-5 OS=Homo sapiens OX=9606 GN=IPO5 PE=1 SV=4	0	52.516	99.9086
P_KWMTBOMO09232		tr|Q5UAS9|Q5UAS9_BOMMO	Ribosomal protein L10A OS=Bombyx mori OX=7091 GN=RpL10A PE=2 SV=1	4.16e-162	100	100		sp|Q963B6|RL10A_SPOFR	60S ribosomal protein L10a OS=Spodoptera frugiperda OX=7108 GN=RpL10A PE=2 SV=1	1.14e-156	96.774	100
P_KWMTBOMO09474		tr|H9JU51|H9JU51_BOMMO	Malate dehydrogenase OS=Bombyx mori OX=7091 GN=101736985 PE=3 SV=1	0	100	100		sp|P40926|MDHM_HUMAN	Malate dehydrogenase, mitochondrial OS=Homo sapiens OX=9606 GN=MDH2 PE=1 SV=3	4.35e-146	60.294	99.7067
P_KWMTBOMO09553		tr|Q1HPN7|Q1HPN7_BOMMO	Fructose-bisphosphate aldolase OS=Bombyx mori OX=7091 GN=778467 PE=2 SV=1	0	100	100		sp|P07764|ALF_DROME	Fructose-bisphosphate aldolase OS=Drosophila melanogaster OX=7227 GN=Ald1 PE=1 SV=5	0	82.143	100
P_KWMTBOMO09631		tr|H9JTW9|H9JTW9_BOMMO	GOLD domain-containing protein OS=Bombyx mori OX=7091 GN=101737070 PE=3 SV=1	5.12e-155	100	100		sp|P49020|TMED2_CRIGR	Transmembrane emp24 domain-containing protein 2 (Fragment) OS=Cricetulus griseus OX=10029 GN=TMED2 PE=1 SV=1	4.26e-87	63.587	90.1961
P_KWMTBOMO09641		tr|Q2F671|Q2F671_BOMMO	NIPSNAP protein OS=Bombyx mori OX=7091 PE=2 SV=1	0	100	97.8022		sp|Q9VXK0|NIPSN_DROME	Protein NipSnap OS=Drosophila melanogaster OX=7227 GN=Nipsnap PE=2 SV=2	9.4e-141	68.498	100
P_KWMTBOMO09657		tr|H9JTV5|H9JTV5_BOMMO	Uncharacterized protein OS=Bombyx mori OX=7091 PE=4 SV=1	0	100	94.0583		sp|Q15020|SART3_HUMAN	Squamous cell carcinoma antigen recognized by T-cells 3 OS=Homo sapiens OX=9606 GN=SART3 PE=1 SV=1	3.1e-76	27.373	100
P_KWMTBOMO09672		tr|H9JTU8|H9JTU8_BOMMO	Uncharacterized protein OS=Bombyx mori OX=7091 PE=4 SV=1	7.15e-83	98.276	42.6471		sp|P48738|PIPNA_RABIT	Phosphatidylinositol transfer protein alpha isoform OS=Oryctolagus cuniculus OX=9986 GN=PITPNA PE=3 SV=2	1.85e-115	59.928	100
P_KWMTBOMO09811		tr|H9JUC9|H9JUC9_BOMMO	PH domain-containing protein OS=Bombyx mori OX=7091 PE=4 SV=1	0	92.813	66.0787		sp|P22059|OSBP1_HUMAN	Oxysterol-binding protein 1 OS=Homo sapiens OX=9606 GN=OSBP PE=1 SV=1	0	49.396	100
P_KWMTBOMO09838		tr|H9JUC0|H9JUC0_BOMMO	Asparagine--tRNA ligase OS=Bombyx mori OX=7091 PE=3 SV=1	0	99.104	100		sp|Q2KJG3|SYNC_BOVIN	Asparagine--tRNA ligase, cytoplasmic OS=Bos taurus OX=9913 GN=NARS PE=2 SV=3	0	70.599	99.4585
P_KWMTBOMO10129		tr|Q2F5X3|Q2F5X3_BOMMO	26S proteasome non-ATPase regulatory subunit 4 OS=Bombyx mori OX=7091 GN=778515 PE=2 SV=1	0	100	100		sp|P55035|PSMD4_DROME	26S proteasome non-ATPase regulatory subunit 4 OS=Drosophila melanogaster OX=7227 GN=Rpn10 PE=1 SV=2	1.63e-145	60.677	100
P_KWMTBOMO10211		tr|Q5UAQ9|Q5UAQ9_BOMMO	60S ribosomal protein L29 OS=Bombyx mori OX=7091 GN=RpL29 PE=2 SV=1	7.51e-48	100	100		sp|Q24154|RL29_DROME	60S ribosomal protein L29 OS=Drosophila melanogaster OX=7227 GN=RpL29 PE=1 SV=1	3.02e-27	65.278	98.6301
P_KWMTBOMO10212		tr|Q0N2R7|Q0N2R7_BOMMO	Signal recognition particle subunit SRP68 OS=Bombyx mori OX=7091 GN=SRP68 PE=2 SV=1	0	100	100		sp|Q9VSS2|SRP68_DROME	Signal recognition particle subunit SRP68 OS=Drosophila melanogaster OX=7227 GN=Srp68 PE=2 SV=1	0	50.413	100
P_KWMTBOMO10310		tr|H9JCL3|H9JCL3_BOMMO	Uncharacterized protein OS=Bombyx mori OX=7091 PE=3 SV=1	1.43e-167	100	92.623		sp|Q91XV4|DCXR_MESAU	L-xylulose reductase OS=Mesocricetus auratus OX=10036 GN=DCXR PE=1 SV=1	3.99e-99	55.328	100
P_KWMTBOMO10337		tr|H9JCI5|H9JCI5_BOMMO	ERF-3 OS=Bombyx mori OX=7091 PE=4 SV=1	0	100	96.3235		sp|Q8R050|ERF3A_MOUSE	Eukaryotic peptide chain release factor GTP-binding subunit ERF3A OS=Mus musculus OX=10090 GN=Gspt1 PE=1 SV=2	0	66.599	90.2574
P_KWMTBOMO10397		tr|H9JBY9|H9JBY9_BOMMO	Uncharacterized protein OS=Bombyx mori OX=7091 PE=3 SV=1	0	82.394	90.5901		sp|P52186|KCNJ2_CHICK	Inward rectifier potassium channel 2 OS=Gallus gallus OX=9031 GN=KCNJ2 PE=2 SV=1	1.92e-127	49.596	59.1707
P_KWMTBOMO10661		tr|H9JFF9|H9JFF9_BOMMO	Uncharacterized protein OS=Bombyx mori OX=7091 PE=4 SV=1	0	99.829	69.8451		sp|B4J9K1|BOP1_DROGR	Ribosome biogenesis protein BOP1 homolog OS=Drosophila grimshawi OX=7222 GN=GH22027 PE=3 SV=1	0	57.698	76.6389
P_KWMTBOMO10779		tr|Q0N2R5|Q0N2R5_BOMMO	Signal recognition particle receptor alpha subunit OS=Bombyx mori OX=7091 PE=2 SV=1	0	99.51	100		sp|Q9U5L1|SRPRA_DROME	Signal recognition particle receptor subunit alpha homolog OS=Drosophila melanogaster OX=7227 GN=SrpRalpha PE=1 SV=2	0	59.486	100
P_KWMTBOMO10965		tr|Q1HQC6|Q1HQC6_BOMMO	26S protease regulatory subunit 6B OS=Bombyx mori OX=7091 PE=2 SV=1	0	100	100		sp|P46507|PRS6B_MANSE	26S proteasome regulatory subunit 6B OS=Manduca sexta OX=7130 PE=2 SV=1	0	98.313	100
P_KWMTBOMO11021		tr|Q5UAM3|Q5UAM3_BOMMO	Ribosomal protein S19 OS=Bombyx mori OX=7091 GN=RpS19 PE=2 SV=1	6.33e-111	100	100		sp|P39018|RS19A_DROME	40S ribosomal protein S19a OS=Drosophila melanogaster OX=7227 GN=RpS19a PE=1 SV=3	5.94e-71	66.892	96.732
P_KWMTBOMO11110		tr|Q0ZB74|Q0ZB74_BOMMO	Eukaryotic translation initiation factor 5 OS=Bombyx mori OX=7091 PE=2 SV=1	0	100	100		sp|Q9VXK6|IF5_DROME	Eukaryotic translation initiation factor 5 OS=Drosophila melanogaster OX=7227 GN=eIF5 PE=1 SV=1	3.65e-164	54.699	89.6328
P_KWMTBOMO11316		tr|H9IX59|H9IX59_BOMMO	Uncharacterized protein OS=Bombyx mori OX=7091 PE=3 SV=1	0	98.19	100		sp|A4FV45|TM214_BOVIN	Transmembrane protein 214 OS=Bos taurus OX=9913 GN=TMEM214 PE=2 SV=1	1.34e-63	29.485	84.917
P_KWMTBOMO11336		tr|H9IX66|H9IX66_BOMMO	Threonyl-tRNA synthetase OS=Bombyx mori OX=7091 PE=3 SV=1	0	98.151	98.5975		sp|Q3ZBV8|SYTC_BOVIN	Threonine--tRNA ligase 1, cytoplasmic OS=Bos taurus OX=9913 GN=TARS1 PE=2 SV=1	0	69.371	100
P_KWMTBOMO11416		tr|H9IXG0|H9IXG0_BOMMO	ATPase ASNA1 homolog OS=Bombyx mori OX=7091 GN=101735717 PE=3 SV=1	0	100	100		sp|B0WEV5|ASNA_CULQU	ATPase ASNA1 homolog OS=Culex quinquefasciatus OX=7176 GN=CPIJ005690 PE=3 SV=1	0	80.428	97.6119
P_KWMTBOMO11570		tr|H9J3K3|H9J3K3_BOMMO	Midasin OS=Bombyx mori OX=7091 PE=3 SV=1	0	99.922	95.8636		sp|Q9NU22|MDN1_HUMAN	Midasin OS=Homo sapiens OX=9606 GN=MDN1 PE=1 SV=2	0	45.946	44.1215
P_KWMTBOMO11741		tr|H9J3V7|H9J3V7_BOMMO	Uncharacterized protein OS=Bombyx mori OX=7091 PE=3 SV=1	1.81e-180	99.19	98.4064		sp|Q8TCT9|HM13_HUMAN	Minor histocompatibility antigen H13 OS=Homo sapiens OX=9606 GN=HM13 PE=1 SV=1	2.27e-101	62.832	90.0398
P_KWMTBOMO11742		tr|H9J3V7|H9J3V7_BOMMO	Uncharacterized protein OS=Bombyx mori OX=7091 PE=3 SV=1	2.4e-68	100	100		sp|Q8TCT9|HM13_HUMAN	Minor histocompatibility antigen H13 OS=Homo sapiens OX=9606 GN=HM13 PE=1 SV=1	2.24e-37	59.804	99.0291
P_KWMTBOMO11772		tr|H9ISG1|H9ISG1_BOMMO	Dolichyl-diphosphooligosaccharide--protein glycosyltransferase subunit DAD1 OS=Bombyx mori OX=7091 GN=101737303 PE=3 SV=1	2.45e-79	100	100		sp|Q9VLM5|DAD1_DROME	Dolichyl-diphosphooligosaccharide--protein glycosyltransferase subunit DAD1 OS=Drosophila melanogaster OX=7227 GN=Dad1 PE=1 SV=1	3.97e-57	72.321	100
P_KWMTBOMO12285		tr|Q93137|Q93137_BOMMO	Reverse transcriptase OS=Bombyx mori OX=7091 PE=4 SV=1	0	71.082	49.2391		sp|O17449|TBB1_MANSE	Tubulin beta-1 chain OS=Manduca sexta OX=7130 PE=2 SV=1	0	99.769	23.4783
P_KWMTBOMO12448		tr|H9IYM5|H9IYM5_BOMMO	Secretory carrier-associated membrane protein OS=Bombyx mori OX=7091 PE=3 SV=1	1.69e-99	87.5	73.0159		sp|Q8K021|SCAM1_MOUSE	Secretory carrier-associated membrane protein 1 OS=Mus musculus OX=10090 GN=Scamp1 PE=1 SV=1	8.88e-77	52.838	90.873
P_KWMTBOMO12560		tr|A0A1Q1NKL1|A0A1Q1NKL1_BOMMO	Tyrosine--tRNA ligase OS=Bombyx mori OX=7091 PE=2 SV=1	0	99.809	100		sp|Q5ZJ08|SYYC_CHICK	Tyrosine--tRNA ligase, cytoplasmic OS=Gallus gallus OX=9031 GN=YARS1 PE=2 SV=1	0	71.374	100
P_KWMTBOMO12602		tr|H9IWB5|H9IWB5_BOMMO	Uncharacterized protein OS=Bombyx mori OX=7091 PE=3 SV=1	0	95.142	67.5882		sp|P37276|DYHC_DROME	Dynein heavy chain, cytoplasmic OS=Drosophila melanogaster OX=7227 GN=Dhc64C PE=2 SV=2	0	79.96	99.7778
P_KWMTBOMO12628		tr|H9IWC7|H9IWC7_BOMMO	Isoleucyl-tRNA synthetase OS=Bombyx mori OX=7091 GN=101742308 PE=3 SV=1	0	99.835	100		sp|Q8BU30|SYIC_MOUSE	Isoleucine--tRNA ligase, cytoplasmic OS=Mus musculus OX=10090 GN=Iars1 PE=1 SV=2	0	60.246	100
P_KWMTBOMO12706		tr|Q5UAQ2|Q5UAQ2_BOMMO	60S ribosomal protein L36 OS=Bombyx mori OX=7091 GN=RpL36 PE=2 SV=1	1.02e-81	100	100		sp|P49630|RL36_DROME	60S ribosomal protein L36 OS=Drosophila melanogaster OX=7227 GN=RpL36 PE=1 SV=1	4.53e-50	71.304	96.6387
P_KWMTBOMO12878		tr|Q0KIX8|Q0KIX8_BOMMO	Glutamate synthase OS=Bombyx mori OX=7091 GN=BmGOGAT PE=2 SV=1	0	99.658	100		sp|Q18164|DPYD_CAEEL	Dihydropyrimidine dehydrogenase [NADP(+)] OS=Caenorhabditis elegans OX=6239 GN=dpyd-1 PE=3 SV=2	2.57e-20	29.206	15.3959
P_KWMTBOMO13041		tr|Q8MUB0|Q8MUB0_BOMMO	Dihydrolipoyl dehydrogenase OS=Bombyx mori OX=7091 GN=692608 PE=2 SV=1	0	100	100		sp|O18480|DLDH_MANSE	Dihydrolipoyl dehydrogenase OS=Manduca sexta OX=7130 PE=2 SV=1	0	89.579	100
P_KWMTBOMO13226		tr|H6VTQ9|H6VTQ9_BOMMO	DnaJ-19 OS=Bombyx mori OX=7091 PE=2 SV=1	0	100	99.2978		sp|Q9UGP8|SEC63_HUMAN	Translocation protein SEC63 homolog OS=Homo sapiens OX=9606 GN=SEC63 PE=1 SV=2	0	44.537	100
P_KWMTBOMO13722		tr|H9JPQ0|H9JPQ0_BOMMO	Uncharacterized protein OS=Bombyx mori OX=7091 PE=3 SV=1	2.24e-39	100	73.5632		sp|Q99417|MYCBP_HUMAN	c-Myc-binding protein OS=Homo sapiens OX=9606 GN=MYCBP PE=1 SV=3	2.31e-23	56.944	82.7586
P_KWMTBOMO13723		tr|Q1HPX3|Q1HPX3_BOMMO	ATP synthase subunit O, mitochondrial OS=Bombyx mori OX=7091 PE=2 SV=1	1.17e-152	100	100		sp|Q24439|ATPO_DROME	ATP synthase subunit O, mitochondrial OS=Drosophila melanogaster OX=7227 GN=ATPsynO PE=2 SV=2	7.56e-89	61.692	96.1722
P_KWMTBOMO13774		tr|Q2F5W7|Q2F5W7_BOMMO	Ras-related GTP-binding protein 4b OS=Bombyx mori OX=7091 GN=692901 PE=2 SV=1	6.54e-160	100	100		sp|Q68EK7|RAB4B_DANRE	Ras-related protein Rab-4B OS=Danio rerio OX=7955 GN=rab4b PE=2 SV=1	5.07e-117	74.648	99.5327
P_KWMTBOMO13859		tr|H9JPJ1|H9JPJ1_BOMMO	40S ribosomal protein S30 OS=Bombyx mori OX=7091 PE=3 SV=1	5.15e-93	100	100		sp|Q9W6Y0|RS30_ORYLA	40S ribosomal protein S30 OS=Oryzias latipes OX=8090 GN=fau PE=3 SV=2	1.58e-23	72.881	45.3846
P_KWMTBOMO14041		tr|Q2F5J1|Q2F5J1_BOMMO	26S proteasome non-ATPase regulatory subunit 13 OS=Bombyx mori OX=7091 PE=2 SV=1	0	100	100		sp|B0BN93|PSD13_RAT	26S proteasome non-ATPase regulatory subunit 13 OS=Rattus norvegicus OX=10116 GN=Psmd13 PE=1 SV=1	1.26e-102	46.921	88.5714
P_KWMTBOMO14157		tr|H9JNS6|H9JNS6_BOMMO	Coatomer subunit gamma OS=Bombyx mori OX=7091 GN=692402 PE=3 SV=1	0	99.768	100		sp|Q29AE5|COPG_DROPS	Coatomer subunit gamma OS=Drosophila pseudoobscura pseudoobscura OX=46245 GN=gammaCop PE=3 SV=1	0	58.75	100
P_KWMTBOMO14240		tr|H9JNK0|H9JNK0_BOMMO	Uncharacterized protein OS=Bombyx mori OX=7091 PE=4 SV=1	0	100	74.0516		sp|Q9VJZ7|RRP1L_DROME	Ribosomal RNA processing protein 1 homolog OS=Drosophila melanogaster OX=7227 GN=Nnp-1 PE=1 SV=1	2.18e-72	29.222	100
P_KWMTBOMO14478		tr|H9IS48|H9IS48_BOMMO	Uncharacterized protein OS=Bombyx mori OX=7091 GN=101742289 PE=3 SV=1	1.04e-66	100	100		sp|Q9W1V3|FBRL_DROME	rRNA 2'-O-methyltransferase fibrillarin OS=Drosophila melanogaster OX=7227 GN=Fib PE=2 SV=1	4.31e-61	94.737	100
P_KWMTBOMO14530		tr|Q2F5R7|Q2F5R7_BOMMO	Eukaryotic peptide chain release factor subunit 1 OS=Bombyx mori OX=7091 PE=2 SV=1	0	99.314	100		sp|Q9VPH7|ERF1_DROME	Eukaryotic peptide chain release factor subunit 1 OS=Drosophila melanogaster OX=7227 GN=eRF1 PE=1 SV=2	0	93.822	100
P_KWMTBOMO14639		tr|Q5UAQ6|Q5UAQ6_BOMMO	60S ribosomal protein L32 OS=Bombyx mori OX=7091 GN=RpL32 PE=2 SV=1	1.84e-97	100	100		sp|Q962T1|RL32_SPOFR	60S ribosomal protein L32 OS=Spodoptera frugiperda OX=7108 GN=RpL32 PE=2 SV=1	6.75e-95	97.761	100
P_KWMTBOMO14715		tr|Q1HPL2|Q1HPL2_BOMMO	Phosphate carrier 1 OS=Bombyx mori OX=7091 GN=PiC PE=2 SV=1	0	100	100		sp|O61703|MPCP_CHOFU	Phosphate carrier protein, mitochondrial OS=Choristoneura fumiferana OX=7141 PE=2 SV=1	0	78.771	100
P_KWMTBOMO14936		tr|H9IU37|H9IU37_BOMMO	GB1/RHD3-type G domain-containing protein OS=Bombyx mori OX=7091 PE=3 SV=1	0	97.695	100		sp|Q9VC57|ATLAS_DROME	Atlastin OS=Drosophila melanogaster OX=7227 GN=atl PE=1 SV=1	0	68.275	97.8221
P_KWMTBOMO14942		tr|H9IU76|H9IU76_BOMMO	AMP deaminase OS=Bombyx mori OX=7091 PE=3 SV=1	0	98.229	97.6064		sp|Q02356|AMPD2_RAT	AMP deaminase 2 OS=Rattus norvegicus OX=10116 GN=Ampd2 PE=1 SV=2	0	59.916	95.2128
P_KWMTBOMO14962		tr|H9IU27|H9IU27_BOMMO	Uncharacterized protein OS=Bombyx mori OX=7091 PE=4 SV=1	0	100	99.4065		sp|Q14690|RRP5_HUMAN	Protein RRP5 homolog OS=Homo sapiens OX=9606 GN=PDCD11 PE=1 SV=3	2.6e-77	28.588	86.8447
P_KWMTBOMO15101		tr|H9J5V8|H9J5V8_BOMMO	Dolichyl-diphosphooligosaccharide--protein glycotransferase OS=Bombyx mori OX=7091 PE=3 SV=1	0	95.652	98.6996		sp|Q3TDQ1|STT3B_MOUSE	Dolichyl-diphosphooligosaccharide--protein glycosyltransferase subunit STT3B OS=Mus musculus OX=10090 GN=Stt3b PE=1 SV=2	0	71.108	98.5696
P_KWMTBOMO15121		tr|Q0N2R8|Q0N2R8_BOMMO	Signal recognition particle 54 kDa protein OS=Bombyx mori OX=7091 GN=SRP54 PE=2 SV=1	0	99.601	100		sp|Q7ZVN5|SRP54_DANRE	Signal recognition particle 54 kDa protein OS=Danio rerio OX=7955 GN=srp54 PE=2 SV=1	0	80.2	99.8004
P_KWMTBOMO15547		tr|H9JMI6|H9JMI6_BOMMO	Nop domain-containing protein OS=Bombyx mori OX=7091 PE=3 SV=1	0	91.939	99.3506		sp|O00567|NOP56_HUMAN	Nucleolar protein 56 OS=Homo sapiens OX=9606 GN=NOP56 PE=1 SV=4	0	66.59	93.9394
P_KWMTBOMO15584		tr|D2Y4R2|D2Y4R2_BOMMO	Coatomer subunit alpha OS=Bombyx mori OX=7091 GN=COPA PE=2 SV=1	0	99.729	99.7297		sp|P53621|COPA_HUMAN	Coatomer subunit alpha OS=Homo sapiens OX=9606 GN=COPA PE=1 SV=2	0	78.729	97.8378
P_KWMTBOMO15665		tr|H9IYF4|H9IYF4_BOMMO	Uncharacterized protein OS=Bombyx mori OX=7091 GN=101736745 PE=4 SV=1	0	100	100		sp|P26305|LPSBP_PERAM	Hemolymph lipopolysaccharide-binding protein OS=Periplaneta americana OX=6978 PE=1 SV=1	3.37e-26	39.716	45.1923
P_KWMTBOMO16130		tr|H9J4U4|H9J4U4_BOMMO	Calcium-transporting ATPase OS=Bombyx mori OX=7091 PE=3 SV=1	0	100	66.4439		sp|Q16720|AT2B3_HUMAN	Plasma membrane calcium-transporting ATPase 3 OS=Homo sapiens OX=9606 GN=ATP2B3 PE=1 SV=3	0	62.683	100
P_KWMTBOMO16204		tr|H9JWQ7|H9JWQ7_BOMMO	CHK domain-containing protein OS=Bombyx mori OX=7091 GN=101744771 PE=4 SV=1	0	100	100		--	--	--	--	--
P_KWMTBOMO16309		tr|H9JW60|H9JW60_BOMMO	UBX domain-containing protein OS=Bombyx mori OX=7091 PE=4 SV=1	1.01e-106	92.353	43.5897		sp|Q3SZC4|NSF1C_BOVIN	NSFL1 cofactor p47 OS=Bos taurus OX=9913 GN=NSFL1C PE=2 SV=1	6.48e-85	40.852	100
P_KWMTBOMO16319		tr|Q2F5K7|Q2F5K7_BOMMO	Receptor expression-enhancing protein OS=Bombyx mori OX=7091 PE=2 SV=1	3.16e-130	99.429	100		sp|Q29RM3|REEP5_BOVIN	Receptor expression-enhancing protein 5 OS=Bos taurus OX=9913 GN=REEP5 PE=2 SV=1	3.07e-59	50.595	96
P_KWMTBOMO16481		tr|Q19KB8|Q19KB8_BOMMO	Ras-related GTP-binding protein Rab11 OS=Bombyx mori OX=7091 GN=733063 PE=2 SV=1	1.33e-160	100	100		sp|P62492|RB11A_MOUSE	Ras-related protein Rab-11A OS=Mus musculus OX=10090 GN=Rab11a PE=1 SV=3	7.02e-129	82.326	100
P_KWMTBOMO16600		tr|H9J1F3|H9J1F3_BOMMO	acidPPc domain-containing protein OS=Bombyx mori OX=7091 PE=4 SV=1	1.7e-144	99.502	93.0556		sp|Q66H88|PLPP6_RAT	Phospholipid phosphatase 6 OS=Rattus norvegicus OX=10116 GN=Plpp6 PE=2 SV=1	1.53e-18	35.754	82.8704

## Sheet: unique PIPs of P25 at M4
Name	Bombyx-mori	Subject ID	Description	e-value	identity(%)	coverage(%)	Metazoa	Subject ID	Description	e-value	identity(%)	coverage(%)
P_KWMTBOMO00437		tr|H9IU13|H9IU13_BOMMO	PHB domain-containing protein OS=Bombyx mori OX=7091 PE=3 SV=1	0	100	98.8263		sp|O61491|FLOT1_DROME	Flotillin-1 OS=Drosophila melanogaster OX=7227 GN=Flo1 PE=2 SV=1	0	83.059	99.7653
P_KWMTBOMO00574		tr|H9JRT0|H9JRT0_BOMMO	Uncharacterized protein OS=Bombyx mori OX=7091 PE=4 SV=1	0	64.645	80.9524		sp|P98160|PGBM_HUMAN	Basement membrane-specific heparan sulfate proteoglycan core protein OS=Homo sapiens OX=9606 GN=HSPG2 PE=1 SV=4	6.49e-141	26.794	84.8306
P_KWMTBOMO00687		tr|H9J134|H9J134_BOMMO	Nucleolar GTP-binding protein 1 OS=Bombyx mori OX=7091 PE=4 SV=1	0	93.029	64.5963		sp|Q9V411|NOG1_DROME	Nucleolar GTP-binding protein 1 OS=Drosophila melanogaster OX=7227 GN=Non1 PE=2 SV=1	0	68.666	100
P_KWMTBOMO00786		tr|H9JJK3|H9JJK3_BOMMO	HIT domain-containing protein OS=Bombyx mori OX=7091 GN=693069 PE=4 SV=1	6.16e-93	100	100		sp|P62958|HINT1_BOVIN	Histidine triad nucleotide-binding protein 1 OS=Bos taurus OX=9913 GN=HINT1 PE=1 SV=2	1.81e-62	68.75	100
P_KWMTBOMO00834		tr|H9JJI4|H9JJI4_BOMMO	RRM domain-containing protein OS=Bombyx mori OX=7091 GN=101746268 PE=4 SV=1	0	100	100		--	--	--	--	--
P_KWMTBOMO00881		tr|D4QF47|D4QF47_BOMMO	Ced-6 protein OS=Bombyx mori OX=7091 GN=ced-6 PE=2 SV=1	0	100	100		sp|Q7JUY7|CED6_DROME	PTB domain-containing adapter protein ced-6 OS=Drosophila melanogaster OX=7227 GN=ced-6 PE=1 SV=1	3.82e-84	39.463	94.347
P_KWMTBOMO01790		tr|H9J907|H9J907_BOMMO	TPR_REGION domain-containing protein OS=Bombyx mori OX=7091 PE=4 SV=1	0	99.758	78.0511		sp|Q9VGU5|TTC14_DROME	Tetratricopeptide repeat protein 14 homolog OS=Drosophila melanogaster OX=7227 GN=CG6621 PE=1 SV=2	1.2e-82	48.657	31.6935
P_KWMTBOMO01817		tr|H9IVQ5|H9IVQ5_BOMMO	RNA helicase OS=Bombyx mori OX=7091 PE=3 SV=1	0	100	50.332		sp|Q501J6|DDX17_MOUSE	Probable ATP-dependent RNA helicase DDX17 OS=Mus musculus OX=10090 GN=Ddx17 PE=1 SV=1	0	61.331	73.838
P_KWMTBOMO02059		tr|Q5UAM4|Q5UAM4_BOMMO	40S ribosomal protein S18 OS=Bombyx mori OX=7091 GN=RpS18 PE=2 SV=1	1.29e-111	100	100		sp|Q962R1|RS18_SPOFR	40S ribosomal protein S18 OS=Spodoptera frugiperda OX=7108 GN=RpS18 PE=2 SV=1	1.23e-110	99.342	100
P_KWMTBOMO02211		tr|E3VQ36|E3VQ36_BOMMO	Non-specific serine/threonine protein kinase OS=Bombyx mori OX=7091 GN=100529202 PE=2 SV=1	0	100	96.635		sp|M3TYT0|ROCK2_PIG	Rho-associated protein kinase 2 OS=Sus scrofa OX=9823 GN=ROCK2 PE=1 SV=1	0	44.876	99.9268
P_KWMTBOMO02432		tr|H9JVD5|H9JVD5_BOMMO	Dolichyl-diphosphooligosaccharide--protein glycosyltransferase subunit 2 OS=Bombyx mori OX=7091 PE=3 SV=1	0	100	100		sp|Q3SZI6|RPN2_BOVIN	Dolichyl-diphosphooligosaccharide--protein glycosyltransferase subunit 2 OS=Bos taurus OX=9913 GN=RPN2 PE=2 SV=1	1.44e-58	28.155	99.3569
P_KWMTBOMO02460		tr|H9IZ80|H9IZ80_BOMMO	Uncharacterized protein OS=Bombyx mori OX=7091 GN=101746215 PE=4 SV=1	0	100	100		--	--	--	--	--
P_KWMTBOMO02748		tr|H9J2I1|H9J2I1_BOMMO	TLC domain-containing protein OS=Bombyx mori OX=7091 GN=101745731 PE=3 SV=1	0	100	100		sp|Q6DED0|TR1L1_XENLA	Translocating chain-associated membrane protein 1-like 1 OS=Xenopus laevis OX=8355 GN=tram1l1 PE=2 SV=1	1.09e-74	35.979	100
P_KWMTBOMO02894		tr|H9J2B5|H9J2B5_BOMMO	Uncharacterized protein OS=Bombyx mori OX=7091 GN=101743323 PE=3 SV=1	0	98.864	98.0501		sp|Q03427|LAMC_DROME	Lamin-C OS=Drosophila melanogaster OX=7227 GN=LamC PE=1 SV=2	2.44e-127	61.491	89.6936
P_KWMTBOMO02994		tr|H9J281|H9J281_BOMMO	DNA photolyase OS=Bombyx mori OX=7091 PE=3 SV=1	0	100	96.0452		sp|Q28811|PHR_POTTR	Deoxyribodipyrimidine photo-lyase OS=Potorous tridactylus OX=9310 GN=PHR PE=2 SV=1	0	59.205	90.0188
P_KWMTBOMO03016		tr|H9J265|H9J265_BOMMO	Uncharacterized protein OS=Bombyx mori OX=7091 PE=4 SV=1	0	88.902	100		sp|Q6NV83|SR140_MOUSE	U2 snRNP-associated SURP motif-containing protein OS=Mus musculus OX=10090 GN=U2surp PE=1 SV=3	0	44.39	94.743
P_KWMTBOMO03146		tr|H9JVB0|H9JVB0_BOMMO	RRM domain-containing protein OS=Bombyx mori OX=7091 PE=4 SV=1	1.87e-131	98.404	53.7143		sp|P31943|HNRH1_HUMAN	Heterogeneous nuclear ribonucleoprotein H OS=Homo sapiens OX=9606 GN=HNRNPH1 PE=1 SV=4	4.35e-92	43.733	100
P_KWMTBOMO03550		tr|H9J9U5|H9J9U5_BOMMO	Chromo domain-containing protein OS=Bombyx mori OX=7091 PE=4 SV=1	1.41e-72	82.09	51.145		sp|Q13185|CBX3_HUMAN	Chromobox protein homolog 3 OS=Homo sapiens OX=9606 GN=CBX3 PE=1 SV=4	2.25e-36	46.309	56.8702
P_KWMTBOMO03748		tr|Q2F645|Q2F645_BOMMO	Transketolase OS=Bombyx mori OX=7091 PE=2 SV=1	0	100	100		sp|Q9D4D4|TKTL2_MOUSE	Transketolase-like protein 2 OS=Mus musculus OX=10090 GN=Tktl2 PE=1 SV=1	0	62.153	98.5531
P_KWMTBOMO04413		tr|H9J7A3|H9J7A3_BOMMO	Uncharacterized protein OS=Bombyx mori OX=7091 PE=4 SV=1	0	99.719	93.9314		sp|Q9WTX2|PRKRA_MOUSE	Interferon-inducible double-stranded RNA-dependent protein kinase activator A OS=Mus musculus OX=10090 GN=Prkra PE=1 SV=1	5.42e-56	36.774	81.7942
P_KWMTBOMO04504		tr|H9J7F7|H9J7F7_BOMMO	Zinc-hook domain-containing protein OS=Bombyx mori OX=7091 PE=3 SV=1	2.04e-100	100	98		sp|Q9W252|RAD50_DROME	DNA repair protein RAD50 OS=Drosophila melanogaster OX=7227 GN=rad50 PE=2 SV=4	9.46e-37	43.791	100
P_KWMTBOMO04505		tr|H9J7F7|H9J7F7_BOMMO	Zinc-hook domain-containing protein OS=Bombyx mori OX=7091 PE=3 SV=1	0	99.3	85.5432		sp|Q9W252|RAD50_DROME	DNA repair protein RAD50 OS=Drosophila melanogaster OX=7227 GN=rad50 PE=2 SV=4	1.59e-155	31.037	100
P_KWMTBOMO04742		tr|Q5UAR2|Q5UAR2_BOMMO	60S ribosomal protein L27 OS=Bombyx mori OX=7091 GN=RpL27 PE=2 SV=1	1.18e-95	100	100		sp|P61354|RL27_RAT	60S ribosomal protein L27 OS=Rattus norvegicus OX=10116 GN=Rpl27 PE=2 SV=2	2.09e-64	71.324	100
P_KWMTBOMO04769		tr|Q6ITV1|Q6ITV1_BOMMO	Transformer-2 protein A OS=Bombyx mori OX=7091 GN=TRA-2 PE=4 SV=2	0	99.648	100		sp|P62996|TRA2B_MOUSE	Transformer-2 protein homolog beta OS=Mus musculus OX=10090 GN=Tra2b PE=1 SV=1	3.65e-57	60.123	57.3944
P_KWMTBOMO05013		tr|H9JF20|H9JF20_BOMMO	Uncharacterized protein OS=Bombyx mori OX=7091 PE=3 SV=1	0	98.512	93.8214		sp|A1Z713|VPS13_DROME	Vacuolar protein sorting-associated protein 13 OS=Drosophila melanogaster OX=7227 GN=Vps13 PE=1 SV=2	0	37.121	100
P_KWMTBOMO05056		tr|Q2F5I7|Q2F5I7_BOMMO	DnaJ homolog subfamily A member 1 OS=Bombyx mori OX=7091 PE=2 SV=1	0	100	100		sp|P31689|DNJA1_HUMAN	DnaJ homolog subfamily A member 1 OS=Homo sapiens OX=9606 GN=DNAJA1 PE=1 SV=2	0	67.246	100
P_KWMTBOMO05673		tr|H9JBE6|H9JBE6_BOMMO	Tudor domain-containing protein OS=Bombyx mori OX=7091 GN=101736520 PE=4 SV=1	0	99.667	100		sp|O88884|AKAP1_RAT	A-kinase anchor protein 1, mitochondrial OS=Rattus norvegicus OX=10116 GN=Akap1 PE=1 SV=1	1.8e-64	39.329	54.7579
P_KWMTBOMO05675		tr|Q5UAR5|Q5UAR5_BOMMO	Ribosomal protein L23A OS=Bombyx mori OX=7091 GN=RpL23A PE=2 SV=1	0	100	100		sp|P62752|RL23A_RAT	60S ribosomal protein L23a OS=Rattus norvegicus OX=10116 GN=Rpl23a PE=2 SV=1	8.65e-62	76.19	35.7955
P_KWMTBOMO05688		tr|H9JBF6|H9JBF6_BOMMO	TOG domain-containing protein OS=Bombyx mori OX=7091 GN=101738436 PE=3 SV=1	0	100	100		sp|O57683|SF3B1_XENLA	Splicing factor 3B subunit 1 OS=Xenopus laevis OX=8355 GN=sf3b1 PE=2 SV=1	0	77.31	100
P_KWMTBOMO05728		tr|H9JBC1|H9JBC1_BOMMO	Aspartate carbamoyltransferase OS=Bombyx mori OX=7091 PE=3 SV=1	0	98.881	100		sp|P05990|PYR1_DROME	CAD protein OS=Drosophila melanogaster OX=7227 GN=r PE=1 SV=3	0	68.238	100
P_KWMTBOMO06056		tr|H9J011|H9J011_BOMMO	DUF1907 domain-containing protein OS=Bombyx mori OX=7091 GN=101745847 PE=4 SV=1	0	100	100		sp|Q91V76|CK054_MOUSE	Ester hydrolase C11orf54 homolog OS=Mus musculus OX=10090 PE=1 SV=1	1.39e-89	44.72	98.4709
P_KWMTBOMO06229		tr|H9IX17|H9IX17_BOMMO	Ribos_L4_asso_C domain-containing protein OS=Bombyx mori OX=7091 GN=692659 PE=3 SV=1	0	100	100		sp|P09180|RL4_DROME	60S ribosomal protein L4 OS=Drosophila melanogaster OX=7227 GN=RpL4 PE=1 SV=2	0	68.407	88.2488
P_KWMTBOMO06334		tr|D2WL76|D2WL76_BOMMO	Sericin 2 OS=Bombyx mori OX=7091 GN=Ser2 PE=4 SV=1	0	96.132	100		sp|Q25460|FP1_MYTED	Adhesive plaque matrix protein (Fragment) OS=Mytilus edulis OX=6550 GN=FP1 PE=1 SV=1	1.11e-56	36.364	41.0212
P_KWMTBOMO06603		tr|H9JQ71|H9JQ71_BOMMO	Uncharacterized protein OS=Bombyx mori OX=7091 PE=4 SV=1	0	100	95.182		sp|Q6AYK9|CDYL_RAT	Chromodomain Y-like protein OS=Rattus norvegicus OX=10116 GN=Cdyl PE=1 SV=1	5.06e-19	25.287	27.9443
P_KWMTBOMO06621		tr|U3U9V0|U3U9V0_BOMMO	Uncharacterized protein OS=Bombyx mori OX=7091 PE=2 SV=1	0	100	100		sp|Q61686|CBX5_MOUSE	Chromobox protein homolog 5 OS=Mus musculus OX=10090 GN=Cbx5 PE=1 SV=1	1.39e-17	35.882	61.5942
P_KWMTBOMO06639		tr|Q2F5Q1|Q2F5Q1_BOMMO	Lysophospholipase OS=Bombyx mori OX=7091 PE=2 SV=1	6.85e-166	100	100		sp|Q3MHR0|LYPA1_BOVIN	Acyl-protein thioesterase 1 OS=Bos taurus OX=9913 GN=LYPLA1 PE=2 SV=1	6.45e-78	53.425	99.5455
P_KWMTBOMO06731		tr|H9JQE1|H9JQE1_BOMMO	Histone deacetylase OS=Bombyx mori OX=7091 PE=3 SV=1	0	91.686	89.648		sp|Q94517|HDAC1_DROME	Histone deacetylase HDAC1 OS=Drosophila melanogaster OX=7227 GN=HDAC1 PE=1 SV=2	0	92.634	92.7536
P_KWMTBOMO06766		tr|H9IU99|H9IU99_BOMMO	CPSF_A domain-containing protein OS=Bombyx mori OX=7091 GN=101738508 PE=4 SV=1	0	99.918	100		sp|Q921M3|SF3B3_MOUSE	Splicing factor 3B subunit 3 OS=Mus musculus OX=10090 GN=Sf3b3 PE=1 SV=1	0	76.346	100
P_KWMTBOMO06787		tr|H9JRF6|H9JRF6_BOMMO	SUMO-activating enzyme subunit OS=Bombyx mori OX=7091 PE=3 SV=1	0	96.875	100		sp|Q28GH3|SAE2_XENTR	SUMO-activating enzyme subunit 2 OS=Xenopus tropicalis OX=8364 GN=uba2 PE=2 SV=1	0	55	95.3947
P_KWMTBOMO06803		tr|H9JR86|H9JR86_BOMMO	CP-type G domain-containing protein OS=Bombyx mori OX=7091 GN=101742911 PE=4 SV=1	0	100	100		sp|Q9W590|LSG1_DROME	Large subunit GTPase 1 homolog OS=Drosophila melanogaster OX=7227 GN=Ns3 PE=1 SV=1	5.32e-148	39.605	100
P_KWMTBOMO07076		tr|H9JLN4|H9JLN4_BOMMO	Uncharacterized protein OS=Bombyx mori OX=7091 PE=4 SV=1	0	99.76	80.0384		sp|Q28EW0|TM87A_XENTR	Transmembrane protein 87A OS=Xenopus tropicalis OX=8364 GN=tmem87a PE=2 SV=1	5.77e-124	39.051	100
P_KWMTBOMO07331		tr|H9JMB7|H9JMB7_BOMMO	Uncharacterized protein OS=Bombyx mori OX=7091 PE=3 SV=1	0	99.752	100		sp|Q80W14|PR40B_MOUSE	Pre-mRNA-processing factor 40 homolog B OS=Mus musculus OX=10090 GN=Prpf40b PE=1 SV=2	6.02e-159	42.751	83.6634
P_KWMTBOMO07380		--	--	--	--	--		--	--	--	--	--
P_KWMTBOMO07506		tr|H9J8Q6|H9J8Q6_BOMMO	BTB domain-containing protein OS=Bombyx mori OX=7091 PE=4 SV=1	0	100	90.3323		sp|Q7KRI2|LOLAL_DROME	Longitudinals lacking protein-like OS=Drosophila melanogaster OX=7227 GN=lolal PE=1 SV=1	1.34e-20	34.862	32.9305
P_KWMTBOMO07780		tr|H9IUH3|H9IUH3_BOMMO	Eukaryotic translation initiation factor 3 subunit M OS=Bombyx mori OX=7091 GN=101737255 PE=3 SV=1	0	100	100		sp|Q17D30|EIF3M_AEDAE	Eukaryotic translation initiation factor 3 subunit M OS=Aedes aegypti OX=7159 GN=AAEL004347 PE=3 SV=1	0	72.798	100
P_KWMTBOMO08022		tr|H9IV52|H9IV52_BOMMO	Dsp protein OS=Bombyx mori OX=7091 GN=dsp PE=2 SV=1	0	100	71.3942		sp|Q24537|HMG2_DROME	High mobility group protein DSP1 OS=Drosophila melanogaster OX=7227 GN=Dsp1 PE=2 SV=1	1.07e-75	48.182	79.3269
P_KWMTBOMO08044		tr|H9IV44|H9IV44_BOMMO	DNA-(apurinic or apyrimidinic site) endonuclease OS=Bombyx mori OX=7091 GN=101739740 PE=3 SV=1	0	100	100		sp|P27864|RRP1_DROME	Recombination repair protein 1 OS=Drosophila melanogaster OX=7227 GN=Rrp1 PE=1 SV=2	6.85e-131	44.487	83.2278
P_KWMTBOMO08194		tr|H9JIX2|H9JIX2_BOMMO	Uncharacterized protein OS=Bombyx mori OX=7091 PE=3 SV=1	1.35e-72	66.522	52.1542		sp|Q9VQ79|AIFM1_DROME	Putative apoptosis-inducing factor 1, mitochondrial OS=Drosophila melanogaster OX=7227 GN=AIF PE=2 SV=2	5.12e-60	35.423	72.3356
P_KWMTBOMO08201		tr|H9JIW6|H9JIW6_BOMMO	Glucosamine-6-phosphate isomerase OS=Bombyx mori OX=7091 GN=101746460 PE=3 SV=1	0	98.12	98.5185		sp|A4IHW6|GNPI2_XENTR	Glucosamine-6-phosphate isomerase 2 OS=Xenopus tropicalis OX=8364 GN=gnpda2 PE=2 SV=1	1.21e-159	75.281	98.8889
P_KWMTBOMO08213		tr|H9JIW2|H9JIW2_BOMMO	Uncharacterized protein OS=Bombyx mori OX=7091 GN=101746972 PE=4 SV=1	0	100	100		sp|P51610|HCFC1_HUMAN	Host cell factor 1 OS=Homo sapiens OX=9606 GN=HCFC1 PE=1 SV=2	0	71.99	45.5847
P_KWMTBOMO08404		tr|H9JI59|H9JI59_BOMMO	RNA cytidine acetyltransferase OS=Bombyx mori OX=7091 PE=3 SV=1	0	96.934	100		sp|Q9W3C1|NAT10_DROME	RNA cytidine acetyltransferase OS=Drosophila melanogaster OX=7227 GN=l(1)G0020 PE=1 SV=2	0	60.513	99.1862
P_KWMTBOMO08509		tr|H9JIL2|H9JIL2_BOMMO	Coronin OS=Bombyx mori OX=7091 PE=3 SV=1	0	88.396	100		sp|Q0V8F1|CORO7_BOVIN	Coronin-7 OS=Bos taurus OX=9913 GN=CORO7 PE=2 SV=1	1.76e-106	43.373	35.4096
P_KWMTBOMO08535		tr|B3GQU6|B3GQU6_BOMMO	3-hydroxyisobutyrate dehydrogenase OS=Bombyx mori OX=7091 GN=Hibadh PE=2 SV=1	5.84e-10	25.126	78.3465		sp|Q7Q161|GLYR1_ANOGA	Putative oxidoreductase GLYR1 homolog OS=Anopheles gambiae OX=7165 GN=AGAP009949 PE=3 SV=5	2.16e-119	64.427	99.6063
P_KWMTBOMO08652		tr|H9JDP0|H9JDP0_BOMMO	Diadenosine tetraphosphate synthetase OS=Bombyx mori OX=7091 PE=3 SV=1	0	100	100		sp|Q04451|SYG_BOMMO	Glycine--tRNA ligase OS=Bombyx mori OX=7091 PE=1 SV=2	0	99.118	100
P_KWMTBOMO08862		tr|H9JE97|H9JE97_BOMMO	SURF6 domain-containing protein OS=Bombyx mori OX=7091 PE=3 SV=1	8.16e-55	97.03	42.9787		sp|Q9VDS6|SURF6_DROME	Surfeit locus protein 6 homolog OS=Drosophila melanogaster OX=7227 GN=Surf6 PE=1 SV=1	8.28e-14	43.011	39.5745
P_KWMTBOMO08865		tr|H9JE95|H9JE95_BOMMO	Protein arginine N-methyltransferase OS=Bombyx mori OX=7091 PE=3 SV=1	0	99.674	91.2202		sp|O14744|ANM5_HUMAN	Protein arginine N-methyltransferase 5 OS=Homo sapiens OX=9606 GN=PRMT5 PE=1 SV=4	7.08e-170	40.413	100
P_KWMTBOMO09000		tr|H9JE32|H9JE32_BOMMO	Uncharacterized protein OS=Bombyx mori OX=7091 PE=3 SV=1	2.27e-105	100	100		sp|P79382|MGST1_PIG	Microsomal glutathione S-transferase 1 OS=Sus scrofa OX=9823 GN=MGST1 PE=2 SV=3	3.61e-32	43.333	99.3377
P_KWMTBOMO09385		tr|H9JT97|H9JT97_BOMMO	TLDc domain-containing protein OS=Bombyx mori OX=7091 PE=4 SV=1	6.24e-121	98.235	34.9794		--	--	--	--	--
P_KWMTBOMO09591		tr|H9JTH6|H9JTH6_BOMMO	Uncharacterized protein OS=Bombyx mori OX=7091 PE=3 SV=1	9.34e-169	100	55.2752		sp|O61492|FLOT2_DROME	Flotillin-2 OS=Drosophila melanogaster OX=7227 GN=Flo2 PE=2 SV=3	0	76.923	95.4128
P_KWMTBOMO10056		tr|B5M9A0|B5M9A0_BOMMO	Myosin heavy chain (Fragment) OS=Bombyx mori OX=7091 PE=2 SV=1	0	55.179	26.9543		sp|Q99323|MYSN_DROME	Myosin heavy chain, non-muscle OS=Drosophila melanogaster OX=7227 GN=zip PE=1 SV=2	0	74.987	100
P_KWMTBOMO10208		tr|H9J7V0|H9J7V0_BOMMO	Eukaryotic translation initiation factor 3 subunit D OS=Bombyx mori OX=7091 PE=3 SV=1	0	100	100		sp|Q0ZB77|EIF3D_BOMMO	Eukaryotic translation initiation factor 3 subunit D OS=Bombyx mori OX=7091 GN=eIF3-S7 PE=2 SV=1	0	99.636	100
P_KWMTBOMO10376		tr|H9JC16|H9JC16_BOMMO	Pept_C1 domain-containing protein OS=Bombyx mori OX=7091 PE=3 SV=1	0	100	100		sp|P00787|CATB_RAT	Cathepsin B OS=Rattus norvegicus OX=10116 GN=Ctsb PE=1 SV=2	8.05e-140	58.333	99.7033
P_KWMTBOMO10493		tr|H9JC69|H9JC69_BOMMO	Eukaryotic translation initiation factor 3 subunit B OS=Bombyx mori OX=7091 PE=3 SV=1	0	99.568	100		sp|Q1HDZ5|EIF3B_BOMMO	Eukaryotic translation initiation factor 3 subunit B OS=Bombyx mori OX=7091 GN=eIF3-S9 PE=2 SV=1	0	99.568	100
P_KWMTBOMO11098		tr|H9JGC5|H9JGC5_BOMMO	RNA-binding motif protein 21 OS=Bombyx mori OX=7091 GN=101736670 PE=4 SV=1	0	100	100		sp|Q1JPD6|STPAP_BOVIN	Speckle targeted PIP5K1A-regulated poly(A) polymerase OS=Bos taurus OX=9913 GN=TUT1 PE=2 SV=1	3.32e-28	31.646	29.4045
P_KWMTBOMO11160		tr|H9JGE9|H9JGE9_BOMMO	Uncharacterized protein OS=Bombyx mori OX=7091 PE=4 SV=1	0	96.247	100		sp|O15381|NVL_HUMAN	Nuclear valosin-containing protein-like OS=Homo sapiens OX=9606 GN=NVL PE=1 SV=1	0	41.724	100
P_KWMTBOMO11394		tr|H9IXH1|H9IXH1_BOMMO	KH domain-containing protein OS=Bombyx mori OX=7091 PE=4 SV=1	3.62e-180	94.928	71.3178		sp|Q5ZIQ3|HNRPK_CHICK	Heterogeneous nuclear ribonucleoprotein K OS=Gallus gallus OX=9031 GN=HNRNPK PE=2 SV=1	3.38e-82	42.344	100
P_KWMTBOMO11517		tr|H9J3H3|H9J3H3_BOMMO	Uncharacterized protein OS=Bombyx mori OX=7091 PE=4 SV=1	0	96.387	98.8417		--	--	--	--	--
P_KWMTBOMO11519		tr|H9J3H4|H9J3H4_BOMMO	Uncharacterized protein OS=Bombyx mori OX=7091 PE=3 SV=1	0	68.669	56.4143		sp|Q86VQ3|TXND2_HUMAN	Thioredoxin domain-containing protein 2 OS=Homo sapiens OX=9606 GN=TXNDC2 PE=1 SV=4	2.1e-08	25.68	10.4846
P_KWMTBOMO11731		sp|Q1HPK6|EF2_BOMMO	Translation elongation factor 2 OS=Bombyx mori OX=7091 GN=tef2 PE=1 SV=1	0	100	100		sp|Q1HPK6|EF2_BOMMO	Translation elongation factor 2 OS=Bombyx mori OX=7091 GN=tef2 PE=1 SV=1	0	100	100
P_KWMTBOMO12165		tr|H9JWZ8|H9JWZ8_BOMMO	Glutathione synthase OS=Bombyx mori OX=7091 PE=3 SV=1	1.95e-169	99.565	52.9954		sp|P35668|GSHB_XENLA	Glutathione synthetase OS=Xenopus laevis OX=8355 GN=gss PE=2 SV=1	2.49e-108	43.564	93.0876
P_KWMTBOMO12205		tr|H9JXB6|H9JXB6_BOMMO	Uncharacterized protein OS=Bombyx mori OX=7091 PE=3 SV=1	0	99.788	99.7886		sp|Q5R1W7|ECHB_PANTR	Trifunctional enzyme subunit beta, mitochondrial OS=Pan troglodytes OX=9598 GN=HADHB PE=2 SV=1	0	66.667	96.4059
P_KWMTBOMO12497		tr|Q5UAN8|Q5UAN8_BOMMO	40S ribosomal protein S6 OS=Bombyx mori OX=7091 GN=RpS6 PE=2 SV=1	0	99.605	100		sp|Q94624|RS6_MANSE	40S ribosomal protein S6 OS=Manduca sexta OX=7130 GN=RpS6 PE=2 SV=1	2.56e-178	96.443	100
P_KWMTBOMO12607		tr|H9IVY4|H9IVY4_BOMMO	Uncharacterized protein OS=Bombyx mori OX=7091 GN=101742698 PE=4 SV=1	0	100	57.1697		sp|P0CG71|UBIQ1_CAEEL	Polyubiquitin-A OS=Caenorhabditis elegans OX=6239 GN=ubq-1 PE=3 SV=1	0	99.88	52.3482
P_KWMTBOMO13405		tr|H9JN03|H9JN03_BOMMO	Proliferating cell nuclear antigen OS=Bombyx mori OX=7091 GN=692356 PE=3 SV=1	0	100	100		sp|O01377|PCNA_BOMMO	Proliferating cell nuclear antigen OS=Bombyx mori OX=7091 GN=PCNA PE=2 SV=1	0	98.846	100
P_KWMTBOMO13641		tr|H9JND7|H9JND7_BOMMO	SMC_N domain-containing protein OS=Bombyx mori OX=7091 PE=4 SV=1	4.13e-107	100	69.0476		sp|O93309|SMC3_XENLA	Structural maintenance of chromosomes protein 3 OS=Xenopus laevis OX=8355 GN=smc3 PE=1 SV=2	5.93e-87	68.317	96.1905
P_KWMTBOMO13997		tr|Q6T9Z7|Q6T9Z7_BOMMO	Fibroinase OS=Bombyx mori OX=7091 GN=693031 PE=2 SV=1	0	100	100		sp|Q26636|CATL_SARPE	Cathepsin L OS=Sarcophaga peregrina OX=7386 PE=1 SV=1	6.18e-177	68.902	96.1877
P_KWMTBOMO14346		tr|H9JFA2|H9JFA2_BOMMO	Thioredoxin domain-containing protein OS=Bombyx mori OX=7091 PE=4 SV=1	0	100	84.3137		sp|Q9H3N1|TMX1_HUMAN	Thioredoxin-related transmembrane protein 1 OS=Homo sapiens OX=9606 GN=TMX1 PE=1 SV=1	1.79e-63	47.802	59.4771
P_KWMTBOMO14417		tr|D2Y4R5|D2Y4R5_BOMMO	Coatomer subunit delta OS=Bombyx mori OX=7091 GN=COPD PE=2 SV=1	1.83e-156	100	100		sp|P53619|COPD_BOVIN	Coatomer subunit delta OS=Bos taurus OX=9913 GN=ARCN1 PE=1 SV=1	4.75e-99	69.712	96.2963
P_KWMTBOMO14483		tr|H9IS46|H9IS46_BOMMO	Uncharacterized protein OS=Bombyx mori OX=7091 PE=4 SV=1	0	99.603	91.3043		sp|P25171|RCC1_DROME	Regulator of chromosome condensation OS=Drosophila melanogaster OX=7227 GN=Rcc1 PE=1 SV=2	7.43e-112	40.272	93.1159
P_KWMTBOMO14568		tr|H9JH04|H9JH04_BOMMO	Importin N-terminal domain-containing protein OS=Bombyx mori OX=7091 PE=3 SV=1	4.68e-93	98.649	15.4489		sp|Q5ZLT0|XPO7_CHICK	Exportin-7 OS=Gallus gallus OX=9031 GN=XPO7 PE=2 SV=1	0	67.216	100
P_KWMTBOMO14858		tr|H9JRJ9|H9JRJ9_BOMMO	Uncharacterized protein OS=Bombyx mori OX=7091 PE=4 SV=2	0	89.299	80.6381		sp|Q02645|HTS_DROME	Protein hu-li tai shao OS=Drosophila melanogaster OX=7227 GN=hts PE=1 SV=2	0	56.932	49.1661
P_KWMTBOMO15314		tr|A0A0K2S4Y7|A0A0K2S4Y7_BOMMO	Sodium/potassium-transporting ATPase subunit alpha OS=Bombyx mori OX=7091 PE=2 SV=1	0	99.901	100		sp|P13607|ATNA_DROME	Sodium/potassium-transporting ATPase subunit alpha OS=Drosophila melanogaster OX=7227 GN=Atpalpha PE=1 SV=3	0	92.254	99.8018
P_KWMTBOMO15583		tr|D2Y4R2|D2Y4R2_BOMMO	Coatomer subunit alpha OS=Bombyx mori OX=7091 GN=COPA PE=2 SV=1	0	99.767	100		sp|Q27954|COPA_BOVIN	Coatomer subunit alpha OS=Bos taurus OX=9913 GN=COPA PE=1 SV=1	0	59.127	100
P_KWMTBOMO15617		tr|A5JPM0|A5JPM0_BOMMO	MLE protein OS=Bombyx mori OX=7091 PE=2 SV=1	0	100	100		sp|P24785|MLE_DROME	Dosage compensation regulator OS=Drosophila melanogaster OX=7227 GN=mle PE=1 SV=2	0	56.49	93.6544
P_KWMTBOMO15867		tr|H9JV01|H9JV01_BOMMO	Uncharacterized protein OS=Bombyx mori OX=7091 GN=101745818 PE=3 SV=1	0	100	100		sp|P48758|CBR1_MOUSE	Carbonyl reductase [NADPH] 1 OS=Mus musculus OX=10090 GN=Cbr1 PE=1 SV=3	2.7e-81	46.739	100
P_KWMTBOMO16130		tr|H9J4U4|H9J4U4_BOMMO	Calcium-transporting ATPase OS=Bombyx mori OX=7091 PE=3 SV=1	0	100	66.4439		sp|Q16720|AT2B3_HUMAN	Plasma membrane calcium-transporting ATPase 3 OS=Homo sapiens OX=9606 GN=ATP2B3 PE=1 SV=3	0	62.683	100
P_KWMTBOMO16524		tr|H9J7Z3|H9J7Z3_BOMMO	RRM domain-containing protein OS=Bombyx mori OX=7091 PE=3 SV=1	1e-90	76.064	100		sp|Q5R1W5|SRSF2_PANTR	Serine/arginine-rich splicing factor 2 OS=Pan troglodytes OX=9598 GN=SRSF2 PE=2 SV=3	1.89e-49	77.083	62.3377
P_KWMTBOMO16530		tr|H9J7S2|H9J7S2_BOMMO	Ribosome biogenesis regulatory protein OS=Bombyx mori OX=7091 GN=101743869 PE=3 SV=1	0	99.716	100		sp|Q9CYH6|RRS1_MOUSE	Ribosome biogenesis regulatory protein homolog OS=Mus musculus OX=10090 GN=Rrs1 PE=1 SV=1	1.15e-85	46.726	95.4545
P_KWMTBOMO16637		tr|Q9GSB6|Q9GSB6_BOMMO	Heat shock protein hsp20.4 OS=Bombyx mori OX=7091 GN=Hsp20.4 PE=2 SV=2	5.98e-133	100	100		sp|P82147|L2EFL_DROME	Protein lethal(2)essential for life OS=Drosophila melanogaster OX=7227 GN=l(2)efl PE=1 SV=1	8.44e-55	50.568	97.2376

## Sheet: unique PIPs of P25 at L5D5
Name	Bombyx-mori	Subject ID	Description	e-value	identity(%)	coverage(%)	Metazoa	Subject ID	Description	e-value	identity(%)	coverage(%)
P_KWMTBOMO00106		tr|H9IXN0|H9IXN0_BOMMO	Uncharacterized protein OS=Bombyx mori OX=7091 PE=4 SV=1	0	92.621	66.1954		sp|O95373|IPO7_HUMAN	Importin-7 OS=Homo sapiens OX=9606 GN=IPO7 PE=1 SV=1	0	50	100
P_KWMTBOMO00223		tr|B0M0V1|B0M0V1_BOMMO	Glycerol kinase OS=Bombyx mori OX=7091 GN=BmGK PE=2 SV=1	0	100	100		sp|Q63060|GLPK_RAT	Glycerol kinase OS=Rattus norvegicus OX=10116 GN=Gk PE=2 SV=1	3.17e-159	57.641	98.4169
P_KWMTBOMO00254		sp|P82204|TPIS_BOMMO	Triosephosphate isomerase OS=Bombyx mori OX=7091 GN=Tpi PE=1 SV=2	0	100	100		sp|P82204|TPIS_BOMMO	Triosephosphate isomerase OS=Bombyx mori OX=7091 GN=Tpi PE=1 SV=2	0	100	100
P_KWMTBOMO00279		tr|H9ITU2|H9ITU2_BOMMO	Citrate synthase OS=Bombyx mori OX=7091 GN=101737646 PE=3 SV=1	0	100	100		sp|Q16P20|CISY2_AEDAE	Probable citrate synthase 2, mitochondrial OS=Aedes aegypti OX=7159 GN=AAEL011789 PE=3 SV=1	0	81.075	100
P_KWMTBOMO00303		tr|H9ITG0|H9ITG0_BOMMO	Rab-GAP TBC domain-containing protein OS=Bombyx mori OX=7091 PE=4 SV=1	0	98.655	99.8779		sp|Q9VYY9|EVI5_DROME	Ecotropic viral integration site 5 ortholog OS=Drosophila melanogaster OX=7227 GN=Evi5 PE=1 SV=3	0	59.115	93.7729
P_KWMTBOMO00362		tr|H9ITY0|H9ITY0_BOMMO	MSP domain-containing protein OS=Bombyx mori OX=7091 PE=3 SV=1	0	100	86.1702		sp|Q16943|VP33_APLCA	Vesicle-associated membrane protein/synaptobrevin-binding protein OS=Aplysia californica OX=6500 PE=2 SV=1	1.32e-48	36.232	97.8723
P_KWMTBOMO00390		tr|H9ITC4|H9ITC4_BOMMO	Uncharacterized protein OS=Bombyx mori OX=7091 PE=4 SV=1	0	100	79.562		--	--	--	--	--
P_KWMTBOMO00473		tr|Q1HPX8|Q1HPX8_BOMMO	6-phosphogluconate dehydrogenase, decarboxylating OS=Bombyx mori OX=7091 PE=2 SV=1	0	100	100		sp|P52209|6PGD_HUMAN	6-phosphogluconate dehydrogenase, decarboxylating OS=Homo sapiens OX=9606 GN=PGD PE=1 SV=3	0	73.542	99.3789
P_KWMTBOMO00637		tr|H9J305|H9J305_BOMMO	Coatomer subunit beta' OS=Bombyx mori OX=7091 GN=100379187 PE=3 SV=1	2.13e-64	100	100		--	--	--	--	--
P_KWMTBOMO00722		tr|A0A0D6A6H2|A0A0D6A6H2_BOMMO	Methionine--tRNA ligase, cytoplasmic OS=Bombyx mori OX=7091 GN=BmMRS PE=2 SV=1	0	100	100		sp|Q6PF21|SYMC_XENLA	Methionine--tRNA ligase, cytoplasmic OS=Xenopus laevis OX=8355 GN=mars1 PE=2 SV=1	0	46.816	89.4106
P_KWMTBOMO00793		tr|H9JJJ8|H9JJJ8_BOMMO	Uncharacterized protein OS=Bombyx mori OX=7091 GN=101743807 PE=3 SV=1	0	100	100		sp|Q68FQ0|TCPE_RAT	T-complex protein 1 subunit epsilon OS=Rattus norvegicus OX=10116 GN=Cct5 PE=1 SV=1	0	70.391	99.0775
P_KWMTBOMO00837		tr|H9JJI3|H9JJI3_BOMMO	Proteasome subunit beta OS=Bombyx mori OX=7091 PE=3 SV=1	0	100	97.3282		sp|P99026|PSB4_MOUSE	Proteasome subunit beta type-4 OS=Mus musculus OX=10090 GN=Psmb4 PE=1 SV=1	1.89e-88	49.799	95.0382
P_KWMTBOMO00860		tr|D2Y4R7|D2Y4R7_BOMMO	Coatomer subunit zeta OS=Bombyx mori OX=7091 GN=COPZ PE=2 SV=1	1.18e-132	100	100		sp|P35604|COPZ1_BOVIN	Coatomer subunit zeta-1 OS=Bos taurus OX=9913 GN=COPZ1 PE=1 SV=2	2.88e-83	62.921	100
P_KWMTBOMO00973		--	--	--	--	--		--	--	--	--	--
P_KWMTBOMO00974		sp|Q6PUF8|RS21_BOMMO	40S ribosomal protein S21 OS=Bombyx mori OX=7091 GN=RpS21 PE=3 SV=1	2.43e-58	100	100		sp|Q962Q8|RS21_SPOFR	40S ribosomal protein S21 OS=Spodoptera frugiperda OX=7108 GN=RpS21 PE=3 SV=1	1.59e-57	100	100
P_KWMTBOMO00982		tr|H9IVS2|H9IVS2_BOMMO	Uncharacterized protein OS=Bombyx mori OX=7091 PE=4 SV=1	9.8e-180	100	48.7129		sp|Q9D0F3|LMAN1_MOUSE	Protein ERGIC-53 OS=Mus musculus OX=10090 GN=Lman1 PE=1 SV=1	1.46e-138	44.353	96.4356
P_KWMTBOMO01055		tr|Q5UAL7|Q5UAL7_BOMMO	40S ribosomal protein S26 OS=Bombyx mori OX=7091 GN=RpS26 PE=2 SV=1	1.02e-81	100	87.1212		sp|Q9GT45|RS26_ANOGA	40S ribosomal protein S26 OS=Anopheles gambiae OX=7165 GN=RpS26 PE=3 SV=2	5.07e-67	84.348	87.1212
P_KWMTBOMO01068		tr|H9JD15|H9JD15_BOMMO	60S ribosomal protein L34 OS=Bombyx mori OX=7091 PE=3 SV=1	1.19e-81	100	100		sp|P45842|RL34_AEDAL	60S ribosomal protein L34 OS=Aedes albopictus OX=7160 GN=RpL34 PE=2 SV=2	1.72e-56	74.074	90.7563
P_KWMTBOMO01114		tr|H9JCT5|H9JCT5_BOMMO	26S proteasome regulatory subunit 7 OS=Bombyx mori OX=7091 GN=101744256 PE=3 SV=1	0	100	100		sp|P35998|PRS7_HUMAN	26S proteasome regulatory subunit 7 OS=Homo sapiens OX=9606 GN=PSMC2 PE=1 SV=3	0	91.014	100
P_KWMTBOMO01129		tr|H9JIS9|H9JIS9_BOMMO	F-actin-capping protein subunit beta OS=Bombyx mori OX=7091 PE=3 SV=1	0	100	100		sp|Q5XI32|CAPZB_RAT	F-actin-capping protein subunit beta OS=Rattus norvegicus OX=10116 GN=Capzb PE=1 SV=1	7.35e-168	81.481	98.1818
P_KWMTBOMO01131		tr|Q4F863|Q4F863_BOMMO	Eukaryotic translation initiation factor 5A OS=Bombyx mori OX=7091 GN=eIF5A PE=2 SV=1	2.3e-118	100	100		sp|P62924|IF5A_SPOEX	Eukaryotic translation initiation factor 5A OS=Spodoptera exigua OX=7107 GN=eIF-5A PE=2 SV=1	1.61e-116	98.75	100
P_KWMTBOMO01148		tr|Q2F5M4|Q2F5M4_BOMMO	Receptor for activated protein kinase C RACK isoform 1 OS=Bombyx mori OX=7091 PE=2 SV=1	0	100	100		sp|O18640|GBLP_DROME	Guanine nucleotide-binding protein subunit beta-like protein OS=Drosophila melanogaster OX=7227 GN=Rack1 PE=1 SV=2	0	86.52	100
P_KWMTBOMO01182		tr|Q1EPM0|Q1EPM0_BOMMO	Glyceraldehyde-3-phosphate dehydrogenase OS=Bombyx mori OX=7091 GN=BmGAPDH PE=2 SV=1	0	100	100		sp|P07487|G3P2_DROME	Glyceraldehyde-3-phosphate dehydrogenase 2 OS=Drosophila melanogaster OX=7227 GN=Gapdh2 PE=1 SV=2	0	84.036	100
P_KWMTBOMO01300		tr|H9JH77|H9JH77_BOMMO	UBX domain-containing protein OS=Bombyx mori OX=7091 GN=101739090 PE=4 SV=1	0	100	100		sp|Q6GQ69|FAF2B_XENLA	FAS-associated factor 2-B OS=Xenopus laevis OX=8355 GN=faf2-b PE=2 SV=1	7.44e-108	40.858	100
P_KWMTBOMO01312		tr|Q2F5N7|Q2F5N7_BOMMO	26S proteasome regulatory subunit RPN11 OS=Bombyx mori OX=7091 PE=2 SV=1	0	100	100		sp|Q9V3H2|PSDE_DROME	26S proteasome non-ATPase regulatory subunit 14 OS=Drosophila melanogaster OX=7227 GN=Rpn11 PE=1 SV=1	0	92.926	100
P_KWMTBOMO01315		tr|Q1HPJ9|Q1HPJ9_BOMMO	V-type proton ATPase subunit H OS=Bombyx mori OX=7091 PE=2 SV=1	0	99.789	100		sp|Q9U5N0|VATH_MANSE	V-type proton ATPase subunit H OS=Manduca sexta OX=7130 PE=2 SV=1	0	96.421	100
P_KWMTBOMO01379		tr|H9JHI6|H9JHI6_BOMMO	2-oxoacid_dh domain-containing protein OS=Bombyx mori OX=7091 PE=4 SV=1	1.12e-103	99.306	49.1468		sp|Q19749|ODP2_CAEEL	Dihydrolipoyllysine-residue acetyltransferase component of pyruvate dehydrogenase complex, mitochondrial OS=Caenorhabditis elegans OX=6239 GN=dlat-1 PE=1 SV=1	2.91e-85	50.593	86.3481
P_KWMTBOMO01380		tr|H9JHI5|H9JHI5_BOMMO	Lipoyl-binding domain-containing protein OS=Bombyx mori OX=7091 PE=4 SV=1	5.01e-120	98.78	92.6554		sp|Q19749|ODP2_CAEEL	Dihydrolipoyllysine-residue acetyltransferase component of pyruvate dehydrogenase complex, mitochondrial OS=Caenorhabditis elegans OX=6239 GN=dlat-1 PE=1 SV=1	2.61e-52	72.414	65.5367
P_KWMTBOMO01423		tr|H9JHG0|H9JHG0_BOMMO	NADH-ubiquinone oxidoreductase 75 kDa subunit, mitochondrial OS=Bombyx mori OX=7091 PE=3 SV=1	0	98.518	100		sp|Q94511|NDUS1_DROME	NADH-ubiquinone oxidoreductase 75 kDa subunit, mitochondrial OS=Drosophila melanogaster OX=7227 GN=ND-75 PE=2 SV=3	0	64.393	100
P_KWMTBOMO01431		tr|H9JHF8|H9JHF8_BOMMO	Voltage-dependent anion-selective channel protein 3 OS=Bombyx mori OX=7091 GN=101739703 PE=3 SV=1	5.89e-131	100	100		sp|Q94920|VDAC_DROME	Voltage-dependent anion-selective channel OS=Drosophila melanogaster OX=7227 GN=porin PE=1 SV=3	8.71e-82	60.656	100
P_KWMTBOMO01579		tr|H9JH15|H9JH15_BOMMO	Uncharacterized protein OS=Bombyx mori OX=7091 PE=3 SV=1	2.14e-165	100	21.0394		sp|Q5F3X8|SC31A_CHICK	Protein transport protein Sec31A OS=Gallus gallus OX=9031 GN=SEC31A PE=2 SV=1	0	32.3	100
P_KWMTBOMO01662		tr|Q19N36|Q19N36_BOMMO	Small GTP binding protein RAB5 OS=Bombyx mori OX=7091 GN=733058 PE=2 SV=1	1.91e-161	100	100		sp|P61021|RAB5B_MOUSE	Ras-related protein Rab-5B OS=Mus musculus OX=10090 GN=Rab5b PE=1 SV=1	1.06e-122	80.374	100
P_KWMTBOMO01757		sp|Q9GV27|EIF3H_BOMMO	Eukaryotic translation initiation factor 3 subunit H OS=Bombyx mori OX=7091 PE=2 SV=1	0	100	100		sp|Q9GV27|EIF3H_BOMMO	Eukaryotic translation initiation factor 3 subunit H OS=Bombyx mori OX=7091 PE=2 SV=1	0	100	100
P_KWMTBOMO01796		tr|Q2F5J2|Q2F5J2_BOMMO	Prohibitin OS=Bombyx mori OX=7091 GN=692987 PE=2 SV=1	0	100	100		sp|P24156|L2CC_DROME	Protein l(2)37Cc OS=Drosophila melanogaster OX=7227 GN=l(2)37Cc PE=2 SV=2	6.28e-169	83.088	99.2701
P_KWMTBOMO01799		tr|Q1HPL3|Q1HPL3_BOMMO	Proteasome 26S non-ATPase subunit 7 OS=Bombyx mori OX=7091 GN=733131 PE=2 SV=1	0	100	100		sp|P26270|PSMD7_DROME	26S proteasome non-ATPase regulatory subunit 7 OS=Drosophila melanogaster OX=7227 GN=Rpn8 PE=1 SV=6	0	80.967	100
P_KWMTBOMO01802		tr|Q3HR36|Q3HR36_BOMMO	L-threonine dehydrogenase OS=Bombyx mori OX=7091 PE=2 SV=1	0	99.706	93.6639		sp|Q2KIR8|TDH_BOVIN	L-threonine 3-dehydrogenase, mitochondrial OS=Bos taurus OX=9913 GN=TDH PE=2 SV=1	4.54e-138	60.062	88.9807
P_KWMTBOMO01806		tr|H9J9G9|H9J9G9_BOMMO	Cation-transporting ATPase OS=Bombyx mori OX=7091 GN=101743411 PE=3 SV=1	0	99.914	100		sp|Q9EPE9|AT131_MOUSE	Manganese-transporting ATPase 13A1 OS=Mus musculus OX=10090 GN=Atp13a1 PE=1 SV=2	0	57.252	100
P_KWMTBOMO01821		tr|H9J9H8|H9J9H8_BOMMO	Uncharacterized protein OS=Bombyx mori OX=7091 GN=101744329 PE=4 SV=1	0	100	89.2635		sp|Q5ZJP5|FND3A_CHICK	Fibronectin type-III domain-containing protein 3a OS=Gallus gallus OX=9031 GN=FNDC3A PE=2 SV=2	0	33.302	95.6522
P_KWMTBOMO01941		tr|Q5UAQ4|Q5UAQ4_BOMMO	60S ribosomal protein L35 OS=Bombyx mori OX=7091 GN=RpL35 PE=2 SV=1	1.64e-84	100	100		sp|Q69CJ9|RL35_OPHHA	60S ribosomal protein L35 OS=Ophiophagus hannah OX=8665 GN=RPL35 PE=2 SV=3	1.41e-50	67.48	100
P_KWMTBOMO02013		tr|H9J125|H9J125_BOMMO	26S proteasome non-ATPase regulatory subunit 6 OS=Bombyx mori OX=7091 GN=101735567 PE=3 SV=1	0	100	100		sp|Q15008|PSMD6_HUMAN	26S proteasome non-ATPase regulatory subunit 6 OS=Homo sapiens OX=9606 GN=PSMD6 PE=1 SV=1	5.45e-102	43.112	100
P_KWMTBOMO02082		sp|Q68HB4|PROF_BOMMO	Profilin OS=Bombyx mori OX=7091 PE=2 SV=1	9.31e-92	100	100		sp|Q68HB4|PROF_BOMMO	Profilin OS=Bombyx mori OX=7091 PE=2 SV=1	6.07e-91	100	100
P_KWMTBOMO02088		tr|H9J0E7|H9J0E7_BOMMO	Lysine--tRNA ligase OS=Bombyx mori OX=7091 GN=101740883 PE=3 SV=1	0	100	100		sp|Q99MN1|SYK_MOUSE	Lysine--tRNA ligase OS=Mus musculus OX=10090 GN=Kars1 PE=1 SV=1	0	68.206	97.069
P_KWMTBOMO02278		sp|Q75VN3|TCTP_BOMMO	Translationally-controlled tumor protein homolog OS=Bombyx mori OX=7091 GN=Tctp PE=2 SV=1	8.85e-126	100	100		sp|Q75VN3|TCTP_BOMMO	Translationally-controlled tumor protein homolog OS=Bombyx mori OX=7091 GN=Tctp PE=2 SV=1	5.77e-125	100	100
P_KWMTBOMO02354		tr|H9JXZ9|H9JXZ9_BOMMO	Uncharacterized protein OS=Bombyx mori OX=7091 PE=4 SV=1	0	97.674	41.28		sp|P45953|ACADV_RAT	Very long-chain specific acyl-CoA dehydrogenase, mitochondrial OS=Rattus norvegicus OX=10116 GN=Acadvl PE=1 SV=1	0	56.689	95.68
P_KWMTBOMO02392		sp|B9VJ80|UBA5_BOMMO	Ubiquitin-like modifier-activating enzyme 5 OS=Bombyx mori OX=7091 PE=2 SV=1	0	99.237	100		sp|B9VJ80|UBA5_BOMMO	Ubiquitin-like modifier-activating enzyme 5 OS=Bombyx mori OX=7091 PE=2 SV=1	0	99.237	100
P_KWMTBOMO02468		tr|H9IZ84|H9IZ84_BOMMO	Uncharacterized protein OS=Bombyx mori OX=7091 PE=3 SV=1	0	99.523	98.8208		sp|Q63081|PDIA6_RAT	Protein disulfide-isomerase A6 OS=Rattus norvegicus OX=10116 GN=Pdia6 PE=1 SV=2	0	59.155	100
P_KWMTBOMO02477		tr|Q5UAR9|Q5UAR9_BOMMO	Ribosomal protein L19 OS=Bombyx mori OX=7091 GN=RpL19 PE=2 SV=1	1.82e-145	100	100		sp|P36241|RL19_DROME	60S ribosomal protein L19 OS=Drosophila melanogaster OX=7227 GN=RpL19 PE=1 SV=2	4.16e-113	84.343	99
P_KWMTBOMO02500		tr|H9IZ97|H9IZ97_BOMMO	Uncharacterized protein OS=Bombyx mori OX=7091 PE=4 SV=1	0	90.773	100		sp|O75439|MPPB_HUMAN	Mitochondrial-processing peptidase subunit beta OS=Homo sapiens OX=9606 GN=PMPCB PE=1 SV=2	0	68	96.5665
P_KWMTBOMO02535		tr|H9IZB1|H9IZB1_BOMMO	Uncharacterized protein OS=Bombyx mori OX=7091 PE=4 SV=1	0	96.875	70.1269		sp|O08730|GLYG_RAT	Glycogenin-1 OS=Rattus norvegicus OX=10116 GN=Gyg1 PE=2 SV=4	3.47e-117	52.395	38.5236
P_KWMTBOMO02542		tr|Q8T7L8|Q8T7L8_BOMMO	Seroin 1 OS=Bombyx mori OX=7091 PE=2 SV=1	7.09e-73	97.222	100		--	--	--	--	--
P_KWMTBOMO02577		tr|H9IZJ0|H9IZJ0_BOMMO	Uncharacterized protein OS=Bombyx mori OX=7091 PE=4 SV=1	0	100	99.858		sp|Q9W266|WDP_DROME	Protein windpipe OS=Drosophila melanogaster OX=7227 GN=wdp PE=1 SV=1	2.32e-16	32.8	35.5114
P_KWMTBOMO02734		tr|Q9BPS1|Q9BPS1_BOMMO	Elongation factor 1 delta OS=Bombyx mori OX=7091 GN=ef-1d PE=2 SV=1	9.74e-145	100	100		sp|P32192|EF1D_ARTSA	Elongation factor 1-delta OS=Artemia salina OX=85549 PE=1 SV=2	5.9e-72	62.632	93.1373
P_KWMTBOMO02775		tr|H9J1V6|H9J1V6_BOMMO	Very-long-chain enoyl-CoA reductase OS=Bombyx mori OX=7091 GN=101742899 PE=3 SV=1	0	100	100		sp|Q9N5Y2|TECR_CAEEL	Probable very-long-chain enoyl-CoA reductase art-1 OS=Caenorhabditis elegans OX=6239 GN=art-1 PE=3 SV=1	6.15e-119	56.209	100
P_KWMTBOMO02836		tr|H9J1Y2|H9J1Y2_BOMMO	Uncharacterized protein OS=Bombyx mori OX=7091 PE=3 SV=1	7.22e-124	90	100		sp|P55326|YZG1_CAEEL	Uncharacterized protein F13E6.1 OS=Caenorhabditis elegans OX=6239 GN=F13E6.1 PE=3 SV=2	1.51e-19	35.032	84.4086
P_KWMTBOMO02840		sp|Q2F5R8|EIF3E_BOMMO	Eukaryotic translation initiation factor 3 subunit E OS=Bombyx mori OX=7091 GN=eIF3-S6 PE=2 SV=1	0	100	100		sp|Q2F5R8|EIF3E_BOMMO	Eukaryotic translation initiation factor 3 subunit E OS=Bombyx mori OX=7091 GN=eIF3-S6 PE=2 SV=1	0	100	100
P_KWMTBOMO02914		--	--	--	--	--		sp|P13804|ETFA_HUMAN	Electron transfer flavoprotein subunit alpha, mitochondrial OS=Homo sapiens OX=9606 GN=ETFA PE=1 SV=1	4.08e-159	69.136	98.1818
P_KWMTBOMO03002		tr|Q587N3|Q587N3_BOMMO	Protein disulfide-isomerase OS=Bombyx mori OX=7091 GN=erp57 PE=2 SV=1	0	100	100		sp|Q8JG64|PDIA3_CHICK	Protein disulfide-isomerase A3 OS=Gallus gallus OX=9031 GN=PDIA3 PE=2 SV=1	4.56e-149	50.644	94.9084
P_KWMTBOMO03003		tr|H9J272|H9J272_BOMMO	Adenylate kinase isoenzyme 6 homolog OS=Bombyx mori OX=7091 GN=101735934 PE=3 SV=1	2.6e-133	100	100		sp|Q7JYV7|KAD6_DROME	Adenylate kinase isoenzyme 6 homolog OS=Drosophila melanogaster OX=7227 GN=Ak6 PE=1 SV=1	3.13e-69	57.317	93.7143
P_KWMTBOMO03027		tr|Q2F5M6|Q2F5M6_BOMMO	Ras small monomeric GTPase Rab6 OS=Bombyx mori OX=7091 PE=2 SV=1	1.13e-158	100	100		sp|O18334|RAB6_DROME	Ras-related protein Rab6 OS=Drosophila melanogaster OX=7227 GN=Rab6 PE=1 SV=1	2.75e-141	90.338	99.0431
P_KWMTBOMO03092		tr|H9J8H0|H9J8H0_BOMMO	Arginine kinase OS=Bombyx mori OX=7091 PE=3 SV=1	0	100	98.4479		sp|Q95PM9|KARG_PLOIN	Arginine kinase OS=Plodia interpunctella OX=58824 GN=ARGK PE=1 SV=1	0	92.394	78.714
P_KWMTBOMO03113		tr|Q2F5V9|Q2F5V9_BOMMO	Translocon-associated protein subunit beta OS=Bombyx mori OX=7091 PE=2 SV=1	1.01e-139	100	100		sp|P43308|SSRB_HUMAN	Translocon-associated protein subunit beta OS=Homo sapiens OX=9606 GN=SSR2 PE=1 SV=1	2.35e-60	52.809	93.6842
P_KWMTBOMO03120		tr|H9J8F1|H9J8F1_BOMMO	Cytochrome c oxidase polypeptide Va OS=Bombyx mori OX=7091 PE=3 SV=1	6.12e-112	100	100		sp|Q94514|COX5A_DROME	Cytochrome c oxidase subunit 5A, mitochondrial OS=Drosophila melanogaster OX=7227 GN=COX5A PE=2 SV=2	2.89e-60	61.745	98.6755
P_KWMTBOMO03169		tr|Q17201|Q17201_BOMMO	Bmsqd-2 OS=Bombyx mori OX=7091 PE=2 SV=1	0	99.34	100		sp|Q08473|SQD_DROME	RNA-binding protein squid OS=Drosophila melanogaster OX=7227 GN=sqd PE=1 SV=3	4.44e-100	72.683	67.6568
P_KWMTBOMO03271		tr|H9JYD8|H9JYD8_BOMMO	Uncharacterized protein OS=Bombyx mori OX=7091 PE=3 SV=1	0	99.727	71.7647		sp|Q9JLH7|CK5P3_RAT	CDK5 regulatory subunit-associated protein 3 OS=Rattus norvegicus OX=10116 GN=Cdk5rap3 PE=1 SV=1	5.35e-137	42.994	100
P_KWMTBOMO03301		tr|E0D4V7|E0D4V7_BOMMO	Phenylalanyl-tRNA synthetase beta subunit OS=Bombyx mori OX=7091 GN=FRSB PE=2 SV=1	0	100	100		sp|Q9VCA5|SYFB_DROME	Phenylalanine--tRNA ligase beta subunit OS=Drosophila melanogaster OX=7227 GN=beta-PheRS PE=1 SV=1	0	66.893	100
P_KWMTBOMO03311		tr|H9JAB8|H9JAB8_BOMMO	RRM domain-containing protein OS=Bombyx mori OX=7091 PE=4 SV=1	0	100	100		sp|P23588|IF4B_HUMAN	Eukaryotic translation initiation factor 4B OS=Homo sapiens OX=9606 GN=EIF4B PE=1 SV=2	2.09e-33	35.971	77.7985
P_KWMTBOMO03337		tr|H9JA60|H9JA60_BOMMO	Uncharacterized protein OS=Bombyx mori OX=7091 PE=4 SV=1	0	98.697	96.8454		sp|P21522|ROA1_SCHAM	Heterogeneous nuclear ribonucleoprotein A1, A2/B1 homolog OS=Schistocerca americana OX=7009 GN=HNRNP PE=2 SV=1	1.83e-91	74.857	55.205
P_KWMTBOMO03473		tr|L8B6C5|L8B6C5_BOMMO	Glucosidase 2 subunit beta OS=Bombyx mori OX=7091 PE=2 SV=1	0	100	100		sp|P14314|GLU2B_HUMAN	Glucosidase 2 subunit beta OS=Homo sapiens OX=9606 GN=PRKCSH PE=1 SV=2	7.96e-116	40.808	94.6463
P_KWMTBOMO03656		tr|H9IY70|H9IY70_BOMMO	Uncharacterized protein OS=Bombyx mori OX=7091 PE=4 SV=1	3.38e-113	79.902	100		sp|P35293|RAB18_MOUSE	Ras-related protein Rab-18 OS=Mus musculus OX=10090 GN=Rab18 PE=1 SV=2	3.29e-73	54.082	96.0784
P_KWMTBOMO03721		tr|H9JKE9|H9JKE9_BOMMO	TPR_REGION domain-containing protein OS=Bombyx mori OX=7091 PE=3 SV=2	0	97.586	100		sp|O43765|SGTA_HUMAN	Small glutamine-rich tetratricopeptide repeat-containing protein alpha OS=Homo sapiens OX=9606 GN=SGTA PE=1 SV=1	4.07e-71	42.997	100
P_KWMTBOMO03722		tr|H9JKE1|H9JKE1_BOMMO	Dynamin-type G domain-containing protein OS=Bombyx mori OX=7091 PE=4 SV=1	0	100	76.6917		sp|Q9H4M9|EHD1_HUMAN	EH domain-containing protein 1 OS=Homo sapiens OX=9606 GN=EHD1 PE=1 SV=2	0	69.101	100
P_KWMTBOMO03951		tr|Q5UAL6|Q5UAL6_BOMMO	40S ribosomal protein S27 OS=Bombyx mori OX=7091 GN=RpS27 PE=2 SV=1	1.35e-59	100	100		sp|P55833|RS27_HOMAM	40S ribosomal protein S27 OS=Homarus americanus OX=6706 GN=RPS27 PE=3 SV=2	1.42e-47	78.571	100
P_KWMTBOMO03975		tr|Q1HPS9|Q1HPS9_BOMMO	Vacuolar ATP synthase subunit E OS=Bombyx mori OX=7091 PE=2 SV=1	2.68e-164	99.558	100		sp|P31402|VATE_MANSE	V-type proton ATPase subunit E OS=Manduca sexta OX=7130 GN=VHA26 PE=2 SV=1	3.29e-156	94.69	100
P_KWMTBOMO03986		tr|Q9NL60|Q9NL60_BOMMO	Annexin OS=Bombyx mori OX=7091 PE=2 SV=1	0	99.69	100		sp|P22464|ANXB9_DROME	Annexin B9 OS=Drosophila melanogaster OX=7227 GN=AnxB9 PE=2 SV=2	9.67e-180	76.012	99.3808
P_KWMTBOMO04003		tr|H9JTB8|H9JTB8_BOMMO	Succinate--CoA ligase [ADP/GDP-forming] subunit alpha, mitochondrial OS=Bombyx mori OX=7091 GN=101735810 PE=3 SV=1	0	100	100		sp|Q94522|SUCA_DROME	Succinate--CoA ligase [ADP/GDP-forming] subunit alpha, mitochondrial OS=Drosophila melanogaster OX=7227 GN=Scsalpha1 PE=2 SV=3	1.01e-166	78.248	100
P_KWMTBOMO04051		tr|H9JL88|H9JL88_BOMMO	UDPGT domain-containing protein OS=Bombyx mori OX=7091 PE=3 SV=1	0	95.709	99.9003		sp|A0A291PQH4|UGT2_DACCO	UDP-glucosyltransferase 2 OS=Dactylopius coccus OX=765876 GN=UTG2 PE=1 SV=1	6.72e-74	31.836	51.0469
P_KWMTBOMO04132		tr|H9JGQ9|H9JGQ9_BOMMO	WD_REPEATS_REGION domain-containing protein OS=Bombyx mori OX=7091 PE=4 SV=1	0	99.782	75.8678		sp|Q9VU68|WDR1_DROME	Actin-interacting protein 1 OS=Drosophila melanogaster OX=7227 GN=flr PE=2 SV=1	0	66.998	99.6694
P_KWMTBOMO04167		tr|Q5CCJ5|Q5CCJ5_BOMMO	Ras oncogene OS=Bombyx mori OX=7091 GN=Bras2 PE=2 SV=1	6.42e-151	100	100		sp|P04388|RAS2_DROME	Ras-like protein 2 OS=Drosophila melanogaster OX=7227 GN=Ras64B PE=1 SV=2	4.74e-100	78.01	95.5
P_KWMTBOMO04170		tr|H9JGS8|H9JGS8_BOMMO	UTP--glucose-1-phosphate uridylyltransferase OS=Bombyx mori OX=7091 PE=3 SV=1	0	100	97.8558		sp|Q07130|UGPA_BOVIN	UTP--glucose-1-phosphate uridylyltransferase OS=Bos taurus OX=9913 GN=UGP2 PE=1 SV=2	0	65.737	97.8558
P_KWMTBOMO04330		tr|H9JX71|H9JX71_BOMMO	PCI domain-containing protein OS=Bombyx mori OX=7091 GN=101735320 PE=3 SV=1	0	100	100		sp|Q7KLV9|PSD11_DROME	26S proteasome non-ATPase regulatory subunit 11 OS=Drosophila melanogaster OX=7227 GN=Rpn6 PE=1 SV=1	0	76.54	100
P_KWMTBOMO04424		tr|H9J7A0|H9J7A0_BOMMO	PA28_alpha domain-containing protein OS=Bombyx mori OX=7091 PE=4 SV=1	3.58e-90	99.225	52.439		sp|Q5F3J5|PSME3_CHICK	Proteasome activator complex subunit 3 OS=Gallus gallus OX=9031 GN=PSME3 PE=1 SV=1	5.95e-92	50.201	100
P_KWMTBOMO04427		tr|H9J7B7|H9J7B7_BOMMO	Signal recognition particle receptor subunit beta OS=Bombyx mori OX=7091 PE=3 SV=1	0	100	100		sp|Q9Y5M8|SRPRB_HUMAN	Signal recognition particle receptor subunit beta OS=Homo sapiens OX=9606 GN=SRPRB PE=1 SV=3	2.92e-59	46.575	87.6
P_KWMTBOMO04529		tr|Q2F6C7|Q2F6C7_BOMMO	ADP-ribosylation factor OS=Bombyx mori OX=7091 GN=778456 PE=2 SV=1	9.95e-136	100	100		sp|P61210|ARF1_LOCMI	ADP-ribosylation factor 1 OS=Locusta migratoria OX=7004 GN=ARF1 PE=2 SV=2	7.09e-134	98.901	100
P_KWMTBOMO04543		tr|H9J7H4|H9J7H4_BOMMO	AP-2 complex subunit alpha OS=Bombyx mori OX=7091 GN=101739513 PE=3 SV=1	0	100	100		sp|Q29N38|AP2A_DROPS	AP-2 complex subunit alpha OS=Drosophila pseudoobscura pseudoobscura OX=46245 GN=alpha-Adaptin PE=3 SV=1	0	82.696	100
P_KWMTBOMO04568		tr|H9J7I1|H9J7I1_BOMMO	Uncharacterized protein OS=Bombyx mori OX=7091 GN=100862833 PE=4 SV=1	0	100	100		sp|Q08D64|ABCB6_XENTR	ATP-binding cassette sub-family B member 6, mitochondrial OS=Xenopus tropicalis OX=8364 GN=abcb6 PE=2 SV=1	0	55.201	95.7503
P_KWMTBOMO04584		tr|Q2F5K1|Q2F5K1_BOMMO	Signal sequence receptor subunit gamma OS=Bombyx mori OX=7091 PE=2 SV=1	1.07e-132	100	100		sp|Q9UNL2|SSRG_HUMAN	Translocon-associated protein subunit gamma OS=Homo sapiens OX=9606 GN=SSR3 PE=1 SV=1	8e-87	64.865	100
P_KWMTBOMO04674		tr|Q1HQ86|Q1HQ86_BOMMO	Mobility group protein 1B OS=Bombyx mori OX=7091 GN=100101161 PE=2 SV=1	3.17e-78	100	100		sp|Q06943|HMGZ_DROME	High mobility group protein Z OS=Drosophila melanogaster OX=7227 GN=HmgZ PE=1 SV=1	5.24e-33	66.234	64.7059
P_KWMTBOMO04737		tr|H9JK23|H9JK23_BOMMO	Carboxylic ester hydrolase OS=Bombyx mori OX=7091 PE=3 SV=1	0	99.538	95.585		sp|B2D0J5|EST6_APIME	Venom carboxylesterase-6 OS=Apis mellifera OX=7460 PE=2 SV=1	1.76e-118	41.256	98.4547
P_KWMTBOMO04740		tr|H9JK13|H9JK13_BOMMO	Endoplasmic reticulum transmembrane protein OS=Bombyx mori OX=7091 GN=101735495 PE=3 SV=1	8.35e-166	100	100		sp|Q5R8H3|BAP31_PONAB	B-cell receptor-associated protein 31 OS=Pongo abelii OX=9601 GN=BCAP31 PE=2 SV=3	1.47e-45	42.742	100
P_KWMTBOMO04757		tr|H9JK06|H9JK06_BOMMO	Uncharacterized protein OS=Bombyx mori OX=7091 PE=3 SV=1	0	95.892	89.6318		sp|Q23979|MY61F_DROME	Unconventional myosin IC OS=Drosophila melanogaster OX=7227 GN=Myo61F PE=1 SV=3	0	60.155	100
P_KWMTBOMO04762		tr|H9JK34|H9JK34_BOMMO	RNA helicase OS=Bombyx mori OX=7091 PE=3 SV=1	0	95.957	100		sp|Q9CWX9|DDX47_MOUSE	Probable ATP-dependent RNA helicase DDX47 OS=Mus musculus OX=10090 GN=Ddx47 PE=2 SV=2	0	71.8	98.0851
P_KWMTBOMO04768		tr|H9JK00|H9JK00_BOMMO	Valyl-tRNA synthetase OS=Bombyx mori OX=7091 PE=3 SV=1	0	93.973	100		sp|Q04462|SYVC_RAT	Valine--tRNA ligase OS=Rattus norvegicus OX=10116 GN=Vars1 PE=2 SV=2	0	59.277	100
P_KWMTBOMO04789		tr|Q2F5P7|Q2F5P7_BOMMO	Mitochondrial matrix protein p32 OS=Bombyx mori OX=7091 PE=2 SV=1	0	100	100		sp|Q3T0B6|C1QBP_BOVIN	Complement component 1 Q subcomponent-binding protein, mitochondrial OS=Bos taurus OX=9913 GN=C1QBP PE=2 SV=1	7.3e-40	32.042	100
P_KWMTBOMO04877		tr|H9JEV4|H9JEV4_BOMMO	Myosin motor domain-containing protein OS=Bombyx mori OX=7091 PE=3 SV=1	0	99.662	24.3021		sp|Q01989|MYS9_DROME	Myosin heavy chain 95F OS=Drosophila melanogaster OX=7227 GN=jar PE=2 SV=4	0	58.481	100
P_KWMTBOMO04906		tr|H9JEW9|H9JEW9_BOMMO	Aminopeptidase N-8 OS=Bombyx mori OX=7091 GN=101737565 PE=2 SV=1	0	98.024	92.4201		sp|P15145|AMPN_PIG	Aminopeptidase N OS=Sus scrofa OX=9823 GN=ANPEP PE=1 SV=4	9.3e-128	32.057	76.347
P_KWMTBOMO04992		tr|H9JEZ8|H9JEZ8_BOMMO	Uncharacterized protein OS=Bombyx mori OX=7091 PE=3 SV=1	0	99.614	100		sp|Q21929|DCXR_CAEEL	L-xylulose reductase OS=Caenorhabditis elegans OX=6239 GN=dhs-21 PE=1 SV=2	5.68e-38	33.597	97.6834
P_KWMTBOMO05032		tr|Q1HQ41|Q1HQ41_BOMMO	Signal recognition particle 19 kDa protein OS=Bombyx mori OX=7091 PE=2 SV=1	6.19e-109	99.324	100		sp|P49963|SRP19_DROME	Signal recognition particle 19 kDa protein OS=Drosophila melanogaster OX=7227 GN=Srp19 PE=2 SV=2	1.63e-51	56.934	92.5676
P_KWMTBOMO05178		tr|Q2F5M8|Q2F5M8_BOMMO	Phosphoserine aminotransferase OS=Bombyx mori OX=7091 PE=2 SV=1	0	100	100		sp|Q9VAN0|SERC_DROME	Probable phosphoserine aminotransferase OS=Drosophila melanogaster OX=7227 GN=CG11899 PE=2 SV=1	9.9e-147	64.935	96.8553
P_KWMTBOMO05228		tr|Q5CCL3|Q5CCL3_BOMMO	Peptidyl-prolyl cis-trans isomerase OS=Bombyx mori OX=7091 PE=2 SV=1	7.28e-122	100	100		sp|P25007|PPIA_DROME	Peptidyl-prolyl cis-trans isomerase OS=Drosophila melanogaster OX=7227 GN=Cyp1 PE=1 SV=2	1.23e-98	79.755	98.7879
P_KWMTBOMO05254		tr|H9IZ07|H9IZ07_BOMMO	RWD domain-containing protein OS=Bombyx mori OX=7091 GN=101745778 PE=4 SV=1	2.39e-176	100	100		sp|Q9CQK7|RWDD1_MOUSE	RWD domain-containing protein 1 OS=Mus musculus OX=10090 GN=Rwdd1 PE=1 SV=1	1.44e-57	50.826	100
P_KWMTBOMO05258		tr|H9IZ08|H9IZ08_BOMMO	Peptidase_M24 domain-containing protein OS=Bombyx mori OX=7091 GN=101746307 PE=3 SV=1	0	100	100		sp|Q6AYD3|PA2G4_RAT	Proliferation-associated protein 2G4 OS=Rattus norvegicus OX=10116 GN=Pa2g4 PE=1 SV=1	1.26e-149	57.778	94.9868
P_KWMTBOMO05281		tr|H9IZ19|H9IZ19_BOMMO	Uncharacterized protein OS=Bombyx mori OX=7091 GN=101735890 PE=3 SV=1	4.73e-144	100	100		sp|Q9CQC9|SAR1B_MOUSE	GTP-binding protein SAR1b OS=Mus musculus OX=10090 GN=Sar1b PE=1 SV=1	9.93e-107	75	100
P_KWMTBOMO05295		tr|H9IZ23|H9IZ23_BOMMO	Pyruvate kinase OS=Bombyx mori OX=7091 PE=3 SV=1	0	99.132	51.2456		sp|O62619|KPYK_DROME	Pyruvate kinase OS=Drosophila melanogaster OX=7227 GN=PyK PE=2 SV=2	0	72.659	47.5089
P_KWMTBOMO05299		tr|H9IYR7|H9IYR7_BOMMO	Uncharacterized protein OS=Bombyx mori OX=7091 PE=3 SV=1	0	96.091	98.0831		sp|O95749|GGPPS_HUMAN	Geranylgeranyl pyrophosphate synthase OS=Homo sapiens OX=9606 GN=GGPS1 PE=1 SV=1	5.33e-131	60.357	89.4569
P_KWMTBOMO05321		tr|H9IYQ9|H9IYQ9_BOMMO	Uncharacterized protein OS=Bombyx mori OX=7091 PE=3 SV=1	0	99.85	97.654		sp|Q9VA73|CMC_DROME	Calcium-binding mitochondrial carrier protein Aralar1 OS=Drosophila melanogaster OX=7227 GN=aralar1 PE=2 SV=1	0	69.001	98.3871
P_KWMTBOMO05357		tr|H9IZ54|H9IZ54_BOMMO	V-type proton ATPase subunit a OS=Bombyx mori OX=7091 PE=3 SV=1	0	93.548	77.685		sp|Q8AVM5|VPP1_XENLA	V-type proton ATPase 116 kDa subunit a1 OS=Xenopus laevis OX=8355 GN=atp6v0a1 PE=2 SV=1	0	59.645	100
P_KWMTBOMO05364		tr|H9IZ59|H9IZ59_BOMMO	Moesin/ezrin/radixin homolog 1 OS=Bombyx mori OX=7091 PE=4 SV=1	0	100	89.418		sp|B0WYY2|MOEH_CULQU	Moesin/ezrin/radixin homolog 1 OS=Culex quinquefasciatus OX=7176 GN=Moe PE=3 SV=1	0	84.441	100
P_KWMTBOMO05464		tr|H9JB09|H9JB09_BOMMO	Vasa intronic protein OS=Bombyx mori OX=7091 GN=101741313 PE=2 SV=1	0	100	100		sp|Q6AXS5|PAIRB_RAT	Plasminogen activator inhibitor 1 RNA-binding protein OS=Rattus norvegicus OX=10116 GN=Serbp1 PE=1 SV=2	1.23e-20	40.625	41.1311
P_KWMTBOMO05509		tr|H9JB27|H9JB27_BOMMO	Uncharacterized protein OS=Bombyx mori OX=7091 PE=4 SV=1	0	100	89.418		sp|Q9CXW2|RT22_MOUSE	28S ribosomal protein S22, mitochondrial OS=Mus musculus OX=10090 GN=Mrps22 PE=1 SV=1	7.68e-52	34.783	79.1005
P_KWMTBOMO05651		tr|H9JB94|H9JB94_BOMMO	Malectin domain-containing protein OS=Bombyx mori OX=7091 GN=101744143 PE=3 SV=1	0	99.621	100		sp|Q14165|MLEC_HUMAN	Malectin OS=Homo sapiens OX=9606 GN=MLEC PE=1 SV=1	8.2e-90	53.226	93.9394
P_KWMTBOMO05719		tr|D2CZY1|D2CZY1_BOMMO	UV excision repair protein RAD23 OS=Bombyx mori OX=7091 GN=100328606 PE=2 SV=1	0	100	100		sp|P54725|RD23A_HUMAN	UV excision repair protein RAD23 homolog A OS=Homo sapiens OX=9606 GN=RAD23A PE=1 SV=1	1.4e-101	52.909	100
P_KWMTBOMO05784		tr|H9JBN7|H9JBN7_BOMMO	DUF1681 domain-containing protein OS=Bombyx mori OX=7091 PE=3 SV=1	3.74e-118	100	66.1088		sp|Q9VXB0|NECAP_DROME	NECAP-like protein CG9132 OS=Drosophila melanogaster OX=7227 GN=CG9132 PE=2 SV=1	5.98e-101	59.216	100
P_KWMTBOMO05806		tr|H9JBP6|H9JBP6_BOMMO	Thioredoxin domain-containing protein OS=Bombyx mori OX=7091 PE=4 SV=1	0	100	93.9726		sp|Q9D1Q6|ERP44_MOUSE	Endoplasmic reticulum resident protein 44 OS=Mus musculus OX=10090 GN=Erp44 PE=1 SV=1	3.26e-135	51.781	100
P_KWMTBOMO05810		tr|H9JBQ0|H9JBQ0_BOMMO	Uncharacterized protein OS=Bombyx mori OX=7091 PE=4 SV=1	0	99.381	50.3565		sp|Q8SWU7|OLA1_DROME	Obg-like ATPase 1 OS=Drosophila melanogaster OX=7227 GN=CG1354 PE=1 SV=1	4.43e-180	78.274	14.9733
P_KWMTBOMO05820		tr|Q2F681|Q2F681_BOMMO	Isocitrate dehydrogenase [NADP] OS=Bombyx mori OX=7091 PE=2 SV=1	0	100	100		sp|Q9Z2K9|IDHC_MICME	Isocitrate dehydrogenase [NADP] cytoplasmic OS=Microtus mexicanus OX=79689 GN=IDH1 PE=2 SV=1	0	77.451	100
P_KWMTBOMO05976		tr|H9J059|H9J059_BOMMO	Tr-type G domain-containing protein OS=Bombyx mori OX=7091 PE=4 SV=1	6.18e-175	93.103	95.2555		sp|D2XV59|GTPB1_RAT	GTP-binding protein 1 OS=Rattus norvegicus OX=10116 GN=Gtpbp1 PE=1 SV=1	1.81e-93	64.317	82.8467
P_KWMTBOMO05993		tr|H9IZY3|H9IZY3_BOMMO	Uncharacterized protein OS=Bombyx mori OX=7091 PE=3 SV=1	0	99.777	90.8907		sp|P91938|TRXR1_DROME	Thioredoxin reductase 1, mitochondrial OS=Drosophila melanogaster OX=7227 GN=Trxr-1 PE=1 SV=2	0	67.677	100
P_KWMTBOMO06045		tr|H9J005|H9J005_BOMMO	TOG domain-containing protein OS=Bombyx mori OX=7091 PE=3 SV=2	0	93.348	100		sp|E9PVA8|GCN1_MOUSE	eIF-2-alpha kinase activator GCN1 OS=Mus musculus OX=10090 GN=Gcn1 PE=1 SV=1	0	45.751	100
P_KWMTBOMO06100		tr|H9IWU2|H9IWU2_BOMMO	Aconitate hydratase OS=Bombyx mori OX=7091 PE=4 SV=1	0	100	44.7309		sp|P21399|ACOC_HUMAN	Cytoplasmic aconitate hydratase OS=Homo sapiens OX=9606 GN=ACO1 PE=1 SV=3	0	66.367	99.6637
P_KWMTBOMO06227		tr|H9IWL2|H9IWL2_BOMMO	HTH La-type RNA-binding domain-containing protein OS=Bombyx mori OX=7091 PE=4 SV=1	0	90.363	59.5484		sp|Q9VAW5|LARP_DROME	La-related protein 1 OS=Drosophila melanogaster OX=7227 GN=larp PE=1 SV=5	4.79e-144	59.113	38.1938
P_KWMTBOMO06228		tr|H9IWL1|H9IWL1_BOMMO	LITAF domain-containing protein OS=Bombyx mori OX=7091 PE=3 SV=1	1.49e-80	99.153	65.5556		--	--	--	--	--
P_KWMTBOMO06291		tr|H9IX45|H9IX45_BOMMO	C2H2-type domain-containing protein OS=Bombyx mori OX=7091 GN=101746228 PE=4 SV=1	0	100	100		--	--	--	--	--
P_KWMTBOMO06299		tr|H9IX47|H9IX47_BOMMO	RNA exonuclease 4 OS=Bombyx mori OX=7091 GN=101746969 PE=3 SV=1	6.14e-62	100	81.6514		sp|Q6PAQ4|REXO4_MOUSE	RNA exonuclease 4 OS=Mus musculus OX=10090 GN=Rexo4 PE=2 SV=2	2.97e-07	35.526	69.7248
P_KWMTBOMO06354		tr|H9JR23|H9JR23_BOMMO	Aminotran_1_2 domain-containing protein OS=Bombyx mori OX=7091 PE=4 SV=1	0	94.624	90.1163		sp|Q28DB5|ALAT2_XENTR	Alanine aminotransferase 2 OS=Xenopus tropicalis OX=8364 GN=gpt2 PE=2 SV=1	0	58.078	94.7674
P_KWMTBOMO06355		tr|H9JR22|H9JR22_BOMMO	Uncharacterized protein OS=Bombyx mori OX=7091 PE=4 SV=1	0	82.688	100		sp|P98158|LRP2_RAT	Low-density lipoprotein receptor-related protein 2 OS=Rattus norvegicus OX=10116 GN=Lrp2 PE=1 SV=1	0	41.512	100
P_KWMTBOMO06373		tr|Q2F5L8|Q2F5L8_BOMMO	Ribonucloprotein OS=Bombyx mori OX=7091 PE=2 SV=1	8.53e-93	100	100		sp|Q5XH16|NH2L1_XENLA	NHP2-like protein 1 OS=Xenopus laevis OX=8355 GN=snu13 PE=2 SV=1	4.36e-77	81.89	97.6923
P_KWMTBOMO06401		tr|Q1HPP3|Q1HPP3_BOMMO	ATP synthase subunit d, mitochondrial OS=Bombyx mori OX=7091 GN=100101181 PE=2 SV=1	1.07e-130	100	100		sp|Q24251|ATP5H_DROME	ATP synthase subunit d, mitochondrial OS=Drosophila melanogaster OX=7227 GN=ATPsynD PE=2 SV=2	2.01e-70	59.88	93.2961
P_KWMTBOMO06427		tr|Q2F5L0|Q2F5L0_BOMMO	Signal sequence receptor subunit alpha OS=Bombyx mori OX=7091 GN=778461 PE=2 SV=1	0	100	100		sp|P43307|SSRA_HUMAN	Translocon-associated protein subunit alpha OS=Homo sapiens OX=9606 GN=SSR1 PE=1 SV=3	6.17e-70	50.45	79.5699
P_KWMTBOMO06474		tr|Q1HQ62|Q1HQ62_BOMMO	Cytochrome c1 OS=Bombyx mori OX=7091 PE=2 SV=1	0	100	100		sp|P00125|CY1_BOVIN	Cytochrome c1, heme protein, mitochondrial OS=Bos taurus OX=9913 GN=CYC1 PE=1 SV=2	1.23e-115	58.746	98.3766
P_KWMTBOMO06558		tr|H9JQL8|H9JQL8_BOMMO	N-acetyltransferase domain-containing protein OS=Bombyx mori OX=7091 GN=101746540 PE=4 SV=1	5.25e-137	100	100		sp|Q9QY36|NAA10_MOUSE	N-alpha-acetyltransferase 10 OS=Mus musculus OX=10090 GN=Naa10 PE=1 SV=1	3.5e-95	83.226	86.1111
P_KWMTBOMO06595		tr|I3VR81|I3VR81_BOMMO	Aminopeptidase OS=Bombyx mori OX=7091 PE=2 SV=1	0	100	100		sp|P55786|PSA_HUMAN	Puromycin-sensitive aminopeptidase OS=Homo sapiens OX=9606 GN=NPEPPS PE=1 SV=2	0	57.324	100
P_KWMTBOMO06660		tr|Q2F640|Q2F640_BOMMO	Ubiquinol-cytochrome c reductase core protein II OS=Bombyx mori OX=7091 GN=100127121 PE=2 SV=1	0	100	100		sp|P22695|QCR2_HUMAN	Cytochrome b-c1 complex subunit 2, mitochondrial OS=Homo sapiens OX=9606 GN=UQCRC2 PE=1 SV=3	1.22e-72	34.615	95.1945
P_KWMTBOMO06763		tr|H9JR70|H9JR70_BOMMO	Uncharacterized protein OS=Bombyx mori OX=7091 PE=4 SV=1	0	99.694	100		--	--	--	--	--
P_KWMTBOMO06772		tr|H9JR72|H9JR72_BOMMO	10 kDa heat shock protein, mitochondrial OS=Bombyx mori OX=7091 GN=101745352 PE=3 SV=1	6.79e-71	100	100		sp|Q5DC69|CH10_SCHJA	10 kDa heat shock protein, mitochondrial OS=Schistosoma japonicum OX=6182 GN=SJCHGC01960 PE=3 SV=2	1.03e-38	61.765	99.0291
P_KWMTBOMO06927		tr|Q0N2S2|Q0N2S2_BOMMO	Small GTP-binding protein Rab10 OS=Bombyx mori OX=7091 GN=778528 PE=2 SV=1	2.84e-152	100	100		sp|P22127|RAB10_DIPOM	Ras-related protein Rab-10 OS=Diplobatis ommata OX=1870830 PE=2 SV=1	9.8e-110	75.862	100
P_KWMTBOMO06932		tr|O01678|O01678_BOMMO	3-oxoacyl-[acyl-carrier-protein] reductase OS=Bombyx mori OX=7091 PE=2 SV=1	0	43.121	100		sp|P12276|FAS_CHICK	Fatty acid synthase OS=Gallus gallus OX=9031 GN=FASN PE=1 SV=5	0	47.841	47.5094
P_KWMTBOMO06999		tr|H9JLS3|H9JLS3_BOMMO	TPR_REGION domain-containing protein OS=Bombyx mori OX=7091 PE=3 SV=1	0	100	100		sp|P31948|STIP1_HUMAN	Stress-induced-phosphoprotein 1 OS=Homo sapiens OX=9606 GN=STIP1 PE=1 SV=1	0	52.007	100
P_KWMTBOMO07103		tr|Q2F5P8|Q2F5P8_BOMMO	Malate dehydrogenase OS=Bombyx mori OX=7091 PE=2 SV=1	0	100	100		sp|O88989|MDHC_RAT	Malate dehydrogenase, cytoplasmic OS=Rattus norvegicus OX=10116 GN=Mdh1 PE=1 SV=3	7.95e-157	65.653	99.3958
P_KWMTBOMO07205		tr|H9JLI0|H9JLI0_BOMMO	Uncharacterized protein OS=Bombyx mori OX=7091 PE=3 SV=1	0	98.254	100		sp|Q24179|SLY1_DROME	Protein sly1 homolog OS=Drosophila melanogaster OX=7227 GN=Slh PE=2 SV=4	0	62.813	100
P_KWMTBOMO07214		tr|D5MTP2|D5MTP2_BOMMO	Bm8 interacting protein 2-11 OS=Bombyx mori OX=7091 PE=2 SV=1	0	94.898	78.8204		sp|Q9VMA7|TGO1_DROME	Transport and Golgi organization protein 1 OS=Drosophila melanogaster OX=7227 GN=Tango1 PE=1 SV=2	6.97e-56	30.097	48.3244
P_KWMTBOMO07247		tr|Q1HQ34|Q1HQ34_BOMMO	H+ transporting ATP synthase delta subunit OS=Bombyx mori OX=7091 GN=100101165 PE=2 SV=1	2.12e-115	100	100		sp|Q9D3D9|ATPD_MOUSE	ATP synthase subunit delta, mitochondrial OS=Mus musculus OX=10090 GN=Atp5f1d PE=1 SV=1	3.61e-44	55.385	80.7453
P_KWMTBOMO07278		tr|H9JM89|H9JM89_BOMMO	PNP_UDP_1 domain-containing protein OS=Bombyx mori OX=7091 GN=101736970 PE=3 SV=1	0	98.214	99.115		sp|Q16831|UPP1_HUMAN	Uridine phosphorylase 1 OS=Homo sapiens OX=9606 GN=UPP1 PE=1 SV=1	1.13e-111	53.135	89.3805
P_KWMTBOMO07368		tr|H9JMD1|H9JMD1_BOMMO	Uncharacterized protein OS=Bombyx mori OX=7091 GN=101744608 PE=3 SV=1	8.23e-94	100	100		sp|P24310|CX7A1_HUMAN	Cytochrome c oxidase subunit 7A1, mitochondrial OS=Homo sapiens OX=9606 GN=COX7A1 PE=1 SV=2	3.33e-12	47.458	45.3846
P_KWMTBOMO07617		tr|H9IVM3|H9IVM3_BOMMO	Uncharacterized protein OS=Bombyx mori OX=7091 PE=3 SV=1	0	100	92.1687		sp|Q5ZJ06|MAGT1_CHICK	Magnesium transporter protein 1 OS=Gallus gallus OX=9031 GN=MAGT1 PE=2 SV=1	3.74e-114	50.943	95.7831
P_KWMTBOMO07685		tr|Q2F5V6|Q2F5V6_BOMMO	Mitochondrial import inner membrane translocase subunit OS=Bombyx mori OX=7091 GN=692908 PE=2 SV=1	3.63e-64	100	100		sp|Q9Y1A3|TIM8_DROME	Mitochondrial import inner membrane translocase subunit Tim8 OS=Drosophila melanogaster OX=7227 GN=Tim8 PE=3 SV=1	2.13e-38	69.88	93.2584
P_KWMTBOMO07723		tr|H9IVI5|H9IVI5_BOMMO	Eukaryotic translation initiation factor 5B OS=Bombyx mori OX=7091 PE=4 SV=1	0	96.413	100		sp|O60841|IF2P_HUMAN	Eukaryotic translation initiation factor 5B OS=Homo sapiens OX=9606 GN=EIF5B PE=1 SV=4	1.08e-159	65.746	39.3478
P_KWMTBOMO07761		tr|H9IUG4|H9IUG4_BOMMO	Uncharacterized protein OS=Bombyx mori OX=7091 PE=4 SV=1	0	94.605	26.4072		sp|Q8MSS1|LVA_DROME	Protein lava lamp OS=Drosophila melanogaster OX=7227 GN=lva PE=1 SV=2	5.58e-15	35.644	7.01876
P_KWMTBOMO07820		tr|H9IVD8|H9IVD8_BOMMO	Uncharacterized protein OS=Bombyx mori OX=7091 GN=101745384 PE=3 SV=1	0	96.905	100		sp|O95757|HS74L_HUMAN	Heat shock 70 kDa protein 4L OS=Homo sapiens OX=9606 GN=HSPA4L PE=1 SV=3	0	48.157	100
P_KWMTBOMO07821		tr|H9IUJ6|H9IUJ6_BOMMO	Transaldolase OS=Bombyx mori OX=7091 PE=3 SV=1	0	100	100		sp|Q2TBL6|TALDO_BOVIN	Transaldolase OS=Bos taurus OX=9913 GN=TALDO1 PE=2 SV=1	4.86e-159	68.598	98.7952
P_KWMTBOMO07855		tr|Q2F6C2|Q2F6C2_BOMMO	CCT-beta OS=Bombyx mori OX=7091 GN=692797 PE=2 SV=1	0	100	100		sp|Q3ZBH0|TCPB_BOVIN	T-complex protein 1 subunit beta OS=Bos taurus OX=9913 GN=CCT2 PE=1 SV=3	0	72.15	99.8134
P_KWMTBOMO07952		tr|H9IUR1|H9IUR1_BOMMO	Histidine--tRNA ligase OS=Bombyx mori OX=7091 PE=3 SV=1	0	66.062	100		sp|Q61035|HARS1_MOUSE	Histidine--tRNA ligase, cytoplasmic OS=Mus musculus OX=10090 GN=Hars1 PE=1 SV=2	0	67.683	95.534
P_KWMTBOMO08040		tr|H9IUV5|H9IUV5_BOMMO	Inosine-5'-monophosphate dehydrogenase OS=Bombyx mori OX=7091 GN=101740233 PE=3 SV=1	0	100	100		sp|Q07152|IMDH_DROME	Inosine-5'-monophosphate dehydrogenase OS=Drosophila melanogaster OX=7227 GN=ras PE=1 SV=1	0	79.093	99.0234
P_KWMTBOMO08045		tr|H9IUV7|H9IUV7_BOMMO	Leucyl-tRNA synthetase OS=Bombyx mori OX=7091 PE=3 SV=1	0	99.658	99.2072		sp|Q9P2J5|SYLC_HUMAN	Leucine--tRNA ligase, cytoplasmic OS=Homo sapiens OX=9606 GN=LARS1 PE=1 SV=2	0	65.984	99.547
P_KWMTBOMO08046		tr|H9IUV7|H9IUV7_BOMMO	Leucyl-tRNA synthetase OS=Bombyx mori OX=7091 PE=3 SV=1	0	99.254	97.1014		sp|Q8BMJ2|SYLC_MOUSE	Leucine--tRNA ligase, cytoplasmic OS=Mus musculus OX=10090 GN=Lars1 PE=1 SV=2	1.02e-65	41.971	99.2754
P_KWMTBOMO08056		tr|H9IV39|H9IV39_BOMMO	Rab GDP dissociation inhibitor OS=Bombyx mori OX=7091 GN=101738804 PE=3 SV=1	0	100	100		sp|P21856|GDIA_BOVIN	Rab GDP dissociation inhibitor alpha OS=Bos taurus OX=9913 GN=GDI1 PE=1 SV=1	0	68.75	100
P_KWMTBOMO08064		tr|Q5UAR1|Q5UAR1_BOMMO	60S ribosomal protein L27a OS=Bombyx mori OX=7091 GN=RpL27A PE=2 SV=1	3.15e-107	100	100		sp|P47830|RL27A_XENLA	60S ribosomal protein L27a OS=Xenopus laevis OX=8355 GN=rpl27a PE=2 SV=2	1.19e-82	77.027	100
P_KWMTBOMO08098		tr|G9FL14|G9FL14_BOMMO	DNA supercoiling factor OS=Bombyx mori OX=7091 GN=LOC692759 PE=2 SV=1	1.98e-48	100	100		sp|B5X4E0|CALUB_SALSA	Calumenin-B OS=Salmo salar OX=8030 GN=calub PE=2 SV=1	7.32e-13	49.333	100
P_KWMTBOMO08204		tr|H9JIZ5|H9JIZ5_BOMMO	Arf-GAP domain-containing protein OS=Bombyx mori OX=7091 GN=101746692 PE=4 SV=1	0	100	100		sp|Q28CM8|ARFG2_XENTR	ADP-ribosylation factor GTPase-activating protein 2 OS=Xenopus tropicalis OX=8364 GN=arfgap2 PE=2 SV=1	1.27e-99	39.455	100
P_KWMTBOMO08241		tr|A5JTL8|A5JTL8_BOMMO	Pyruvate dehydrogenase E1 component subunit alpha OS=Bombyx mori OX=7091 GN=l(b002) PE=2 SV=1	0	100	100		sp|P52899|ODPA_CAEEL	Probable pyruvate dehydrogenase E1 component subunit alpha, mitochondrial OS=Caenorhabditis elegans OX=6239 GN=T05H10.6 PE=3 SV=1	0	63.636	96.4912
P_KWMTBOMO08343		tr|H9JI86|H9JI86_BOMMO	Uncharacterized protein OS=Bombyx mori OX=7091 PE=4 SV=1	0	100	71.519		sp|P54802|ANAG_HUMAN	Alpha-N-acetylglucosaminidase OS=Homo sapiens OX=9606 GN=NAGLU PE=1 SV=2	2.63e-165	41.81	67.616
P_KWMTBOMO08464		sp|P21828|FIBL_BOMMO	Fibroin light chain OS=Bombyx mori OX=7091 GN=FIBL PE=1 SV=1	0	100	100		sp|P21828|FIBL_BOMMO	Fibroin light chain OS=Bombyx mori OX=7091 GN=FIBL PE=1 SV=1	0	100	100
P_KWMTBOMO08552		tr|H9JIG6|H9JIG6_BOMMO	BEACH-type PH domain-containing protein OS=Bombyx mori OX=7091 PE=4 SV=1	0	99.482	84.0271		sp|Q9W4E2|NBEA_DROME	Neurobeachin OS=Drosophila melanogaster OX=7227 GN=rg PE=1 SV=4	0	83.709	27.9284
P_KWMTBOMO08578		tr|H9JDK4|H9JDK4_BOMMO	Multifunctional fusion protein OS=Bombyx mori OX=7091 GN=101741966 PE=3 SV=1	0	100	100		sp|Q7SY23|AL4A1_DANRE	Delta-1-pyrroline-5-carboxylate dehydrogenase, mitochondrial OS=Danio rerio OX=7955 GN=aldh4a1 PE=2 SV=1	0	55.159	94.3363
P_KWMTBOMO08584		tr|H9JDK7|H9JDK7_BOMMO	Uncharacterized protein OS=Bombyx mori OX=7091 PE=4 SV=1	0	99.913	57.4937		sp|O15027|SC16A_HUMAN	Protein transport protein Sec16A OS=Homo sapiens OX=9606 GN=SEC16A PE=1 SV=4	3.13e-60	34.081	22.3559
P_KWMTBOMO08596		tr|H9JEM4|H9JEM4_BOMMO	Uncharacterized protein OS=Bombyx mori OX=7091 PE=3 SV=1	1.43e-162	100	97.6959		sp|Q7SXP0|S22BB_DANRE	Vesicle-trafficking protein SEC22b-B OS=Danio rerio OX=7955 GN=sec22bb PE=2 SV=1	4.44e-87	56.621	100
P_KWMTBOMO08672		tr|Q1HQ66|Q1HQ66_BOMMO	AIR carboxylase OS=Bombyx mori OX=7091 GN=732910 PE=1 SV=1	0	100	100		sp|Q9I7S8|PUR6_DROME	Multifunctional protein ADE2 OS=Drosophila melanogaster OX=7227 GN=Paics PE=2 SV=2	0	69.007	97.1765
P_KWMTBOMO08699		tr|Q5UAT3|Q5UAT3_BOMMO	60S ribosomal protein L7a OS=Bombyx mori OX=7091 GN=RpL7A PE=2 SV=1	0	100	100		sp|P46223|RL7A_DROME	60S ribosomal protein L7a OS=Drosophila melanogaster OX=7227 GN=RpL7A PE=1 SV=2	1.06e-136	75.984	94.7761
P_KWMTBOMO08707		tr|H9JDR8|H9JDR8_BOMMO	Elongator complex protein 3 OS=Bombyx mori OX=7091 PE=3 SV=1	0	99.66	82.4684		sp|Q5ZHS1|ELP3_CHICK	Elongator complex protein 3 OS=Gallus gallus OX=9031 GN=ELP3 PE=2 SV=1	0	84.962	74.6143
P_KWMTBOMO08734		tr|H9JEG2|H9JEG2_BOMMO	Uncharacterized protein OS=Bombyx mori OX=7091 PE=4 SV=1	0	96.168	71.4034		sp|A2AWA9|RBGP1_MOUSE	Rab GTPase-activating protein 1 OS=Mus musculus OX=10090 GN=Rabgap1 PE=1 SV=1	0	39.326	86.4078
P_KWMTBOMO08760		tr|H9JDT4|H9JDT4_BOMMO	Phosphoglycerate kinase OS=Bombyx mori OX=7091 PE=3 SV=1	0	100	94.9398		sp|Q01604|PGK_DROME	Phosphoglycerate kinase OS=Drosophila melanogaster OX=7227 GN=Pgk PE=2 SV=2	0	77.349	100
P_KWMTBOMO08815		tr|H9JEC2|H9JEC2_BOMMO	Uncharacterized protein OS=Bombyx mori OX=7091 GN=101746856 PE=4 SV=1	0	95.364	100		sp|Q767L0|ABCF1_PIG	ATP-binding cassette sub-family F member 1 OS=Sus scrofa OX=9823 GN=ABCF1 PE=3 SV=1	0	63.973	68.75
P_KWMTBOMO08894		tr|Q5UAN9|Q5UAN9_BOMMO	Ribosomal protein S5 OS=Bombyx mori OX=7091 GN=RpS5 PE=2 SV=1	3.62e-166	100	100		sp|P46782|RS5_HUMAN	40S ribosomal protein S5 OS=Homo sapiens OX=9606 GN=RPS5 PE=1 SV=4	1.84e-134	91.327	89.4977
P_KWMTBOMO08930		tr|H9JDX6|H9JDX6_BOMMO	S-formylglutathione hydrolase OS=Bombyx mori OX=7091 PE=3 SV=1	0	100	89.547		sp|Q9GJT2|ESTD_PIG	S-formylglutathione hydrolase OS=Sus scrofa OX=9823 GN=ESD PE=2 SV=1	1.95e-129	61.754	99.3031
P_KWMTBOMO08961		tr|Q5UAQ8|Q5UAQ8_BOMMO	60S ribosomal protein L30 OS=Bombyx mori OX=7091 GN=RpL30 PE=2 SV=1	2.87e-80	100	100		sp|P58375|RL30_SPOFR	60S ribosomal protein L30 OS=Spodoptera frugiperda OX=7108 GN=RpL30 PE=3 SV=1	9.75e-78	99.099	98.2301
P_KWMTBOMO08991		tr|H9JE36|H9JE36_BOMMO	Succinate-CoA ligase subunit beta OS=Bombyx mori OX=7091 PE=3 SV=1	0	99.729	80.9211		sp|Q9Z2I9|SUCB1_MOUSE	Succinate--CoA ligase [ADP-forming] subunit beta, mitochondrial OS=Mus musculus OX=10090 GN=Sucla2 PE=1 SV=2	0	62.319	90.7895
P_KWMTBOMO09050		tr|H9JDA0|H9JDA0_BOMMO	Uncharacterized protein OS=Bombyx mori OX=7091 PE=4 SV=1	0	100	92.7966		sp|Q96RQ3|MCCA_HUMAN	Methylcrotonoyl-CoA carboxylase subunit alpha, mitochondrial OS=Homo sapiens OX=9606 GN=MCCC1 PE=1 SV=3	0	56.278	95.6215
P_KWMTBOMO09183		tr|H9J1H4|H9J1H4_BOMMO	Uncharacterized protein OS=Bombyx mori OX=7091 PE=4 SV=1	0	99.804	46.6179		sp|O00410|IPO5_HUMAN	Importin-5 OS=Homo sapiens OX=9606 GN=IPO5 PE=1 SV=4	0	52.516	99.9086
P_KWMTBOMO09232		tr|Q5UAS9|Q5UAS9_BOMMO	Ribosomal protein L10A OS=Bombyx mori OX=7091 GN=RpL10A PE=2 SV=1	4.16e-162	100	100		sp|Q963B6|RL10A_SPOFR	60S ribosomal protein L10a OS=Spodoptera frugiperda OX=7108 GN=RpL10A PE=2 SV=1	1.14e-156	96.774	100
P_KWMTBOMO09236		tr|H9J1E8|H9J1E8_BOMMO	Proteasome endopeptidase complex OS=Bombyx mori OX=7091 GN=101745852 PE=4 SV=1	4.69e-170	100	100		sp|P28072|PSB6_HUMAN	Proteasome subunit beta type-6 OS=Homo sapiens OX=9606 GN=PSMB6 PE=1 SV=4	7.04e-108	67.308	92.4444
P_KWMTBOMO09250		tr|H9J1E3|H9J1E3_BOMMO	IU_nuc_hydro domain-containing protein OS=Bombyx mori OX=7091 PE=4 SV=1	0	98.442	96.3964		--	--	--	--	--
P_KWMTBOMO09355		tr|Q6T3A7|Q6T3A7_BOMMO	Thiol peroxiredoxin OS=Bombyx mori OX=7091 GN=692638 PE=2 SV=1	5.6e-148	100	100		sp|Q9V3P0|PRDX1_DROME	Peroxiredoxin 1 OS=Drosophila melanogaster OX=7227 GN=Jafrac1 PE=1 SV=1	8.32e-117	81.152	97.9487
P_KWMTBOMO09387		sp|H9JU86|POXIN_BOMMO	Poxin OS=Bombyx mori OX=7091 PE=1 SV=1	4.15e-180	100	100		sp|H9JU86|POXIN_BOMMO	Poxin OS=Bombyx mori OX=7091 PE=1 SV=1	2.7e-179	100	100
P_KWMTBOMO09390		tr|H9JU84|H9JU84_BOMMO	Splicing factor, arginine/serine-rich 1 OS=Bombyx mori OX=7091 PE=3 SV=1	6.24e-155	100	100		sp|Q6NYA0|SRS1B_DANRE	Serine/arginine-rich splicing factor 1B OS=Danio rerio OX=7955 GN=srsf1b PE=2 SV=1	3.58e-87	71.939	91.1628
P_KWMTBOMO09474		tr|H9JU51|H9JU51_BOMMO	Malate dehydrogenase OS=Bombyx mori OX=7091 GN=101736985 PE=3 SV=1	0	100	100		sp|P40926|MDHM_HUMAN	Malate dehydrogenase, mitochondrial OS=Homo sapiens OX=9606 GN=MDH2 PE=1 SV=3	4.35e-146	60.294	99.7067
P_KWMTBOMO09553		tr|Q1HPN7|Q1HPN7_BOMMO	Fructose-bisphosphate aldolase OS=Bombyx mori OX=7091 GN=778467 PE=2 SV=1	0	100	100		sp|P07764|ALF_DROME	Fructose-bisphosphate aldolase OS=Drosophila melanogaster OX=7227 GN=Ald1 PE=1 SV=5	0	82.143	100
P_KWMTBOMO09597		tr|H9JXD6|H9JXD6_BOMMO	Carrier domain-containing protein OS=Bombyx mori OX=7091 PE=3 SV=1	0	99.659	63.2829		sp|Q63ZT8|AL1L1_XENTR	Cytosolic 10-formyltetrahydrofolate dehydrogenase OS=Xenopus tropicalis OX=8364 GN=aldh1l1 PE=2 SV=1	0	63.865	98.9201
P_KWMTBOMO09631		tr|H9JTW9|H9JTW9_BOMMO	GOLD domain-containing protein OS=Bombyx mori OX=7091 GN=101737070 PE=3 SV=1	5.12e-155	100	100		sp|P49020|TMED2_CRIGR	Transmembrane emp24 domain-containing protein 2 (Fragment) OS=Cricetulus griseus OX=10029 GN=TMED2 PE=1 SV=1	4.26e-87	63.587	90.1961
P_KWMTBOMO09641		tr|Q2F671|Q2F671_BOMMO	NIPSNAP protein OS=Bombyx mori OX=7091 PE=2 SV=1	0	100	97.8022		sp|Q9VXK0|NIPSN_DROME	Protein NipSnap OS=Drosophila melanogaster OX=7227 GN=Nipsnap PE=2 SV=2	9.4e-141	68.498	100
P_KWMTBOMO09672		tr|H9JTU8|H9JTU8_BOMMO	Uncharacterized protein OS=Bombyx mori OX=7091 PE=4 SV=1	7.15e-83	98.276	42.6471		sp|P48738|PIPNA_RABIT	Phosphatidylinositol transfer protein alpha isoform OS=Oryctolagus cuniculus OX=9986 GN=PITPNA PE=3 SV=2	1.85e-115	59.928	100
P_KWMTBOMO09788		tr|Q2QEH2|Q2QEH2_BOMMO	Cellular retinoic acid binding protein OS=Bombyx mori OX=7091 GN=BmFABP1 PE=2 SV=1	1.36e-94	100	100		sp|C4N147|FABP1_DORPE	Sodium/calcium exchanger regulatory protein 1 OS=Doryteuthis pealeii OX=1051067 PE=1 SV=1	2.61e-37	46.4	94.697
P_KWMTBOMO09811		tr|H9JUC9|H9JUC9_BOMMO	PH domain-containing protein OS=Bombyx mori OX=7091 PE=4 SV=1	0	92.813	66.0787		sp|P22059|OSBP1_HUMAN	Oxysterol-binding protein 1 OS=Homo sapiens OX=9606 GN=OSBP PE=1 SV=1	0	49.396	100
P_KWMTBOMO09838		tr|H9JUC0|H9JUC0_BOMMO	Asparagine--tRNA ligase OS=Bombyx mori OX=7091 PE=3 SV=1	0	99.104	100		sp|Q2KJG3|SYNC_BOVIN	Asparagine--tRNA ligase, cytoplasmic OS=Bos taurus OX=9913 GN=NARS PE=2 SV=3	0	70.599	99.4585
P_KWMTBOMO09900		tr|Q1HPY7|Q1HPY7_BOMMO	Phosphatidylethanolamine binding protein isoform 2 OS=Bombyx mori OX=7091 PE=2 SV=1	2.65e-142	99.487	43.722		sp|O16264|PEBPH_CAEEL	Phosphatidylethanolamine-binding protein homolog F40A3.3 OS=Caenorhabditis elegans OX=6239 GN=F40A3.3 PE=3 SV=1	8.92e-76	60	42.6009
P_KWMTBOMO09934		tr|H9JUN1|H9JUN1_BOMMO	Phosphoglycerate mutase OS=Bombyx mori OX=7091 PE=3 SV=1	0	100	100		sp|Q5ZLN1|PGAM1_CHICK	Phosphoglycerate mutase 1 OS=Gallus gallus OX=9031 GN=PGAM1 PE=1 SV=3	4.89e-125	67.589	99.2157
P_KWMTBOMO09954		tr|H9JUM2|H9JUM2_BOMMO	Proline dehydrogenase OS=Bombyx mori OX=7091 PE=3 SV=1	0	100	58.6364		sp|Q04499|PROD_DROME	Proline dehydrogenase 1, mitochondrial OS=Drosophila melanogaster OX=7227 GN=slgA PE=2 SV=2	0	60.081	74.3939
P_KWMTBOMO10049		sp|Q5UAP8|RL38_BOMMO	60S ribosomal protein L38 OS=Bombyx mori OX=7091 GN=RpL38 PE=3 SV=1	8.84e-45	100	100		sp|Q5UAP8|RL38_BOMMO	60S ribosomal protein L38 OS=Bombyx mori OX=7091 GN=RpL38 PE=3 SV=1	5.76e-44	100	100
P_KWMTBOMO10128		tr|H9J806|H9J806_BOMMO	Uncharacterized protein OS=Bombyx mori OX=7091 PE=3 SV=1	1.66e-70	100	91.5888		sp|Q9W141|ATPK_DROME	Putative ATP synthase subunit f, mitochondrial OS=Drosophila melanogaster OX=7227 GN=ATPsynF PE=3 SV=1	7.4e-60	75.701	100
P_KWMTBOMO10129		tr|Q2F5X3|Q2F5X3_BOMMO	26S proteasome non-ATPase regulatory subunit 4 OS=Bombyx mori OX=7091 GN=778515 PE=2 SV=1	0	100	100		sp|P55035|PSMD4_DROME	26S proteasome non-ATPase regulatory subunit 4 OS=Drosophila melanogaster OX=7227 GN=Rpn10 PE=1 SV=2	1.63e-145	60.677	100
P_KWMTBOMO10147		tr|H9J7Z3|H9J7Z3_BOMMO	RRM domain-containing protein OS=Bombyx mori OX=7091 PE=3 SV=1	9.38e-80	85.106	100		sp|P30352|SRSF2_CHICK	Serine/arginine-rich splicing factor 2 OS=Gallus gallus OX=9031 GN=SRSF2 PE=2 SV=1	6.66e-51	75.49	57.6271
P_KWMTBOMO10169		tr|H9J7Y6|H9J7Y6_BOMMO	OMPdecase OS=Bombyx mori OX=7091 PE=3 SV=1	0	100	100		sp|Q01637|UMPS_DROME	Uridine 5'-monophosphate synthase OS=Drosophila melanogaster OX=7227 GN=r-l PE=2 SV=2	6.51e-172	50.924	100
P_KWMTBOMO10212		tr|Q0N2R7|Q0N2R7_BOMMO	Signal recognition particle subunit SRP68 OS=Bombyx mori OX=7091 GN=SRP68 PE=2 SV=1	0	100	100		sp|Q9VSS2|SRP68_DROME	Signal recognition particle subunit SRP68 OS=Drosophila melanogaster OX=7227 GN=Srp68 PE=2 SV=1	0	50.413	100
P_KWMTBOMO10243		tr|H9JCR8|H9JCR8_BOMMO	Ubiquitin carboxyl-terminal hydrolase 7 OS=Bombyx mori OX=7091 PE=3 SV=1	0	95.544	100		sp|Q4VSI4|UBP7_RAT	Ubiquitin carboxyl-terminal hydrolase 7 OS=Rattus norvegicus OX=10116 GN=Usp7 PE=1 SV=1	0	60.572	96.6964
P_KWMTBOMO10283		tr|H9JCM2|H9JCM2_BOMMO	PCI domain-containing protein OS=Bombyx mori OX=7091 GN=692900 PE=3 SV=1	0	100	100		sp|Q9D8W5|PSD12_MOUSE	26S proteasome non-ATPase regulatory subunit 12 OS=Mus musculus OX=10090 GN=Psmd12 PE=1 SV=4	0	59.071	100
P_KWMTBOMO10310		tr|H9JCL3|H9JCL3_BOMMO	Uncharacterized protein OS=Bombyx mori OX=7091 PE=3 SV=1	1.43e-167	100	92.623		sp|Q91XV4|DCXR_MESAU	L-xylulose reductase OS=Mesocricetus auratus OX=10036 GN=DCXR PE=1 SV=1	3.99e-99	55.328	100
P_KWMTBOMO10337		tr|H9JCI5|H9JCI5_BOMMO	ERF-3 OS=Bombyx mori OX=7091 PE=4 SV=1	0	100	96.3235		sp|Q8R050|ERF3A_MOUSE	Eukaryotic peptide chain release factor GTP-binding subunit ERF3A OS=Mus musculus OX=10090 GN=Gspt1 PE=1 SV=2	0	66.599	90.2574
P_KWMTBOMO10354		tr|H9JCH9|H9JCH9_BOMMO	PP28 domain-containing protein OS=Bombyx mori OX=7091 GN=101735383 PE=4 SV=1	1.27e-121	100	100		sp|Q13442|HAP28_HUMAN	28 kDa heat- and acid-stable phosphoprotein OS=Homo sapiens OX=9606 GN=PDAP1 PE=1 SV=1	2.8e-30	50	91.8605
P_KWMTBOMO10453		tr|Q1HQ70|Q1HQ70_BOMMO	Transgelin OS=Bombyx mori OX=7091 PE=2 SV=1	5.19e-142	100	100		sp|Q24799|MYPH_ECHGR	Myophilin OS=Echinococcus granulosus OX=6210 PE=2 SV=1	1.03e-54	48.168	100
P_KWMTBOMO10489		tr|H9JC66|H9JC66_BOMMO	Dihydropyrimidine dehydrogenase [NADP(+)] OS=Bombyx mori OX=7091 PE=3 SV=1	0	96.884	100		sp|Q6NYG8|DPYD_DANRE	Dihydropyrimidine dehydrogenase [NADP(+)] OS=Danio rerio OX=7955 GN=dpyd PE=2 SV=1	0	66.246	100
P_KWMTBOMO10508		tr|H9JC76|H9JC76_BOMMO	Citrate hydro-lyase OS=Bombyx mori OX=7091 PE=3 SV=1	0	99.636	69.6701		sp|P34455|ACON_CAEEL	Probable aconitate hydratase, mitochondrial OS=Caenorhabditis elegans OX=6239 GN=aco-2 PE=3 SV=2	0	78.238	95.0508
P_KWMTBOMO10558		tr|H9JC99|H9JC99_BOMMO	3-hydroxyisobutyrate dehydrogenase OS=Bombyx mori OX=7091 PE=3 SV=1	0	100	100		sp|P29266|3HIDH_RAT	3-hydroxyisobutyrate dehydrogenase, mitochondrial OS=Rattus norvegicus OX=10116 GN=Hibadh PE=1 SV=3	3.18e-89	46.602	95.9627
P_KWMTBOMO10591		tr|Q6PUF7|Q6PUF7_BOMMO	40S ribosomal protein S24 OS=Bombyx mori OX=7091 GN=100101150 PE=2 SV=1	4.69e-94	100	100		sp|Q962Q6|RS24_SPOFR	40S ribosomal protein S24 OS=Spodoptera frugiperda OX=7108 GN=RpS24 PE=2 SV=1	2.8e-92	98.485	100
P_KWMTBOMO10779		tr|Q0N2R5|Q0N2R5_BOMMO	Signal recognition particle receptor alpha subunit OS=Bombyx mori OX=7091 PE=2 SV=1	0	99.51	100		sp|Q9U5L1|SRPRA_DROME	Signal recognition particle receptor subunit alpha homolog OS=Drosophila melanogaster OX=7227 GN=SrpRalpha PE=1 SV=2	0	59.486	100
P_KWMTBOMO10816		tr|H9JFZ5|H9JFZ5_BOMMO	Pyruvate carboxylase OS=Bombyx mori OX=7091 PE=4 SV=1	0	97.263	98.9002		sp|P11498|PYC_HUMAN	Pyruvate carboxylase, mitochondrial OS=Homo sapiens OX=9606 GN=PC PE=1 SV=2	0	68.512	97.8003
P_KWMTBOMO10916		tr|Q1HQ44|Q1HQ44_BOMMO	Proteasome subunit alpha type OS=Bombyx mori OX=7091 PE=2 SV=1	0	100	100		sp|O70435|PSA3_MOUSE	Proteasome subunit alpha type-3 OS=Mus musculus OX=10090 GN=Psma3 PE=1 SV=3	2.47e-130	65.49	100
P_KWMTBOMO10965		tr|Q1HQC6|Q1HQC6_BOMMO	26S protease regulatory subunit 6B OS=Bombyx mori OX=7091 PE=2 SV=1	0	100	100		sp|P46507|PRS6B_MANSE	26S proteasome regulatory subunit 6B OS=Manduca sexta OX=7130 PE=2 SV=1	0	98.313	100
P_KWMTBOMO11021		tr|Q5UAM3|Q5UAM3_BOMMO	Ribosomal protein S19 OS=Bombyx mori OX=7091 GN=RpS19 PE=2 SV=1	6.33e-111	100	100		sp|P39018|RS19A_DROME	40S ribosomal protein S19a OS=Drosophila melanogaster OX=7227 GN=RpS19a PE=1 SV=3	5.94e-71	66.892	96.732
P_KWMTBOMO11064		tr|A0A1L6UW57|A0A1L6UW57_BOMMO	Hypoxia up-regulated-like protein OS=Bombyx mori OX=7091 PE=2 SV=1	0	100	100		sp|Q7ZUW2|HYOU1_DANRE	Hypoxia up-regulated protein 1 OS=Danio rerio OX=7955 GN=hyou1 PE=2 SV=1	0	44.531	98.6784
P_KWMTBOMO11161		tr|H9JGE8|H9JGE8_BOMMO	26S proteasome non-ATPase regulatory subunit 8 OS=Bombyx mori OX=7091 GN=101737946 PE=3 SV=1	0	100	100		sp|Q9CX56|PSMD8_MOUSE	26S proteasome non-ATPase regulatory subunit 8 OS=Mus musculus OX=10090 GN=Psmd8 PE=1 SV=2	3.67e-110	60.075	100
P_KWMTBOMO11192		tr|C6L8Q2|C6L8Q2_BOMMO	Putative acetyl transferase OS=Bombyx mori OX=7091 GN=Bmat1 PE=2 SV=1	0	100	100		sp|P42765|THIM_HUMAN	3-ketoacyl-CoA thiolase, mitochondrial OS=Homo sapiens OX=9606 GN=ACAA2 PE=1 SV=2	5.87e-173	58.987	99.7475
P_KWMTBOMO11413		tr|H9IX93|H9IX93_BOMMO	Alpha-amylase OS=Bombyx mori OX=7091 PE=3 SV=1	0	93.421	100		sp|Q0P5L8|KBL_BOVIN	2-amino-3-ketobutyrate coenzyme A ligase, mitochondrial OS=Bos taurus OX=9913 GN=GCAT PE=1 SV=1	1.85e-172	58.561	94.6009
P_KWMTBOMO11486		tr|H9IXD2|H9IXD2_BOMMO	Proteasome endopeptidase complex OS=Bombyx mori OX=7091 PE=3 SV=1	1.39e-142	91.324	85.214		sp|P25789|PSA4_HUMAN	Proteasome subunit alpha type-4 OS=Homo sapiens OX=9606 GN=PSMA4 PE=1 SV=1	2.07e-149	82.278	92.2179
P_KWMTBOMO11514		tr|H9IT60|H9IT60_BOMMO	PHB domain-containing protein OS=Bombyx mori OX=7091 PE=3 SV=1	6.72e-21	34.132	41.2346		sp|Q9UJZ1|STML2_HUMAN	Stomatin-like protein 2, mitochondrial OS=Homo sapiens OX=9606 GN=STOML2 PE=1 SV=1	2.52e-149	68.687	73.3333
P_KWMTBOMO11680		tr|H9J390|H9J390_BOMMO	Seryl-tRNA synthetase OS=Bombyx mori OX=7091 GN=101743384 PE=3 SV=1	0	100	100		sp|Q9GMB8|SYSC_BOVIN	Serine--tRNA ligase, cytoplasmic OS=Bos taurus OX=9913 GN=SARS1 PE=2 SV=3	0	69.495	100
P_KWMTBOMO11689		tr|H9J385|H9J385_BOMMO	Uncharacterized protein OS=Bombyx mori OX=7091 PE=4 SV=1	0	100	100		sp|O18373|SPS1_DROME	Inactive selenide, water dikinase-like protein OS=Drosophila melanogaster OX=7227 GN=SelD PE=2 SV=1	0	87.94	99.005
P_KWMTBOMO11710		sp|Q0ZB73|EIF3J_BOMMO	Eukaryotic translation initiation factor 3 subunit J OS=Bombyx mori OX=7091 PE=2 SV=1	9.13e-177	100	100		sp|Q0ZB73|EIF3J_BOMMO	Eukaryotic translation initiation factor 3 subunit J OS=Bombyx mori OX=7091 PE=2 SV=1	5.95e-176	100	100
P_KWMTBOMO11771		tr|Q1HQ18|Q1HQ18_BOMMO	Proteasome endopeptidase complex OS=Bombyx mori OX=7091 GN=100101166 PE=2 SV=1	4.64e-178	100	100		sp|P40304|PSB1_DROME	Proteasome subunit beta type-1 OS=Drosophila melanogaster OX=7227 GN=Prosbeta6 PE=2 SV=2	3.74e-105	62.009	98.7069
P_KWMTBOMO11812		tr|Q1HQ98|Q1HQ98_BOMMO	Cytochrome c oxidase polypeptide IV OS=Bombyx mori OX=7091 GN=780848 PE=2 SV=1	3.9e-133	100	100		sp|O46578|COX41_GORGO	Cytochrome c oxidase subunit 4 isoform 1, mitochondrial (Fragment) OS=Gorilla gorilla gorilla OX=9595 GN=COX4I1 PE=3 SV=1	1.73e-38	48.12	74.7191
P_KWMTBOMO11977		tr|H9J4D7|H9J4D7_BOMMO	Proteasome subunit beta OS=Bombyx mori OX=7091 GN=101740220 PE=3 SV=1	0	100	100		sp|P28075|PSB5_RAT	Proteasome subunit beta type-5 OS=Rattus norvegicus OX=10116 GN=Psmb5 PE=1 SV=3	2.21e-102	61.233	80.212
P_KWMTBOMO11987		tr|Q5UAN1|Q5UAN1_BOMMO	40S ribosomal protein S12 OS=Bombyx mori OX=7091 GN=RpS12 PE=2 SV=1	4.19e-99	100	100		sp|P80455|RS12_DROME	40S ribosomal protein S12 OS=Drosophila melanogaster OX=7227 GN=RpS12 PE=1 SV=2	1.09e-68	72.143	100
P_KWMTBOMO12094		tr|Q1HPM2|Q1HPM2_BOMMO	Phosphoenolpyruvate carboxykinase (GTP) OS=Bombyx mori OX=7091 PE=2 SV=1	0	99.365	99.8415		sp|P20007|PCKG_DROME	Phosphoenolpyruvate carboxykinase [GTP] OS=Drosophila melanogaster OX=7227 GN=Pepck PE=2 SV=2	0	65.645	98.2567
P_KWMTBOMO12193		tr|H9JXB0|H9JXB0_BOMMO	COX6C domain-containing protein OS=Bombyx mori OX=7091 GN=101746562 PE=3 SV=1	1.23e-53	100	100		sp|Q7YRK7|COX6C_TARSY	Cytochrome c oxidase subunit 6C OS=Tarsius syrichta OX=1868482 GN=COX6C PE=3 SV=1	1.86e-18	53.623	88.4615
P_KWMTBOMO12199		tr|H9JXB2|H9JXB2_BOMMO	AAA domain-containing protein OS=Bombyx mori OX=7091 GN=101747034 PE=3 SV=1	0	100	100		sp|P54814|PRS8_MANSE	26S proteasome regulatory subunit 8 OS=Manduca sexta OX=7130 PE=2 SV=1	0	99.256	100
P_KWMTBOMO12208		tr|H9JE23|H9JE23_BOMMO	SAC domain-containing protein OS=Bombyx mori OX=7091 PE=4 SV=1	3.33e-156	100	35.9532		sp|Q9W0I6|SAC1_DROME	Phosphatidylinositol-3-phosphatase SAC1 OS=Drosophila melanogaster OX=7227 GN=Sac1 PE=2 SV=1	0	49.144	97.6589
P_KWMTBOMO12285		tr|Q93137|Q93137_BOMMO	Reverse transcriptase OS=Bombyx mori OX=7091 PE=4 SV=1	0	71.082	49.2391		sp|O17449|TBB1_MANSE	Tubulin beta-1 chain OS=Manduca sexta OX=7130 PE=2 SV=1	0	99.769	23.4783
P_KWMTBOMO12287		tr|Q5UAM2|Q5UAM2_BOMMO	40S ribosomal protein S20 OS=Bombyx mori OX=7091 GN=RpS20 PE=2 SV=1	3.74e-87	100	100		sp|P55828|RS20_DROME	40S ribosomal protein S20 OS=Drosophila melanogaster OX=7227 GN=RpS20 PE=1 SV=1	1.92e-68	83.74	100
P_KWMTBOMO12304		tr|H9JHX3|H9JHX3_BOMMO	4_1_CTD domain-containing protein OS=Bombyx mori OX=7091 PE=4 SV=1	0	98.443	72.6316		sp|Q9V8R9|EPB41_DROME	Protein 4.1 homolog OS=Drosophila melanogaster OX=7227 GN=cora PE=1 SV=1	0	52.778	36.4912
P_KWMTBOMO12428		sp|Q5UAS2|RL17_BOMMO	60S ribosomal protein L17 OS=Bombyx mori OX=7091 GN=RpL17 PE=2 SV=1	5.32e-141	100	100		sp|Q5UAS2|RL17_BOMMO	60S ribosomal protein L17 OS=Bombyx mori OX=7091 GN=RpL17 PE=2 SV=1	3.47e-140	100	100
P_KWMTBOMO12442		tr|H9IYM1|H9IYM1_BOMMO	Methenyltetrahydrofolate cyclohydrolase OS=Bombyx mori OX=7091 GN=101741628 PE=2 SV=1	0	100	95.2532		sp|Q9H903|MTD2L_HUMAN	Probable bifunctional methylenetetrahydrofolate dehydrogenase/cyclohydrolase 2 OS=Homo sapiens OX=9606 GN=MTHFD2L PE=1 SV=3	1.2e-122	60.204	93.038
P_KWMTBOMO12448		tr|H9IYM5|H9IYM5_BOMMO	Secretory carrier-associated membrane protein OS=Bombyx mori OX=7091 PE=3 SV=1	1.69e-99	87.5	73.0159		sp|Q8K021|SCAM1_MOUSE	Secretory carrier-associated membrane protein 1 OS=Mus musculus OX=10090 GN=Scamp1 PE=1 SV=1	8.88e-77	52.838	90.873
P_KWMTBOMO12461		tr|Q4JI71|Q4JI71_BOMMO	FK506-binding protein OS=Bombyx mori OX=7091 GN=FKBP45 PE=2 SV=1	0	100	100		sp|Q26486|FKBP4_SPOFR	46 kDa FK506-binding nuclear protein OS=Spodoptera frugiperda OX=7108 GN=FKBP46 PE=2 SV=1	0	71.838	100
P_KWMTBOMO12628		tr|H9IWC7|H9IWC7_BOMMO	Isoleucyl-tRNA synthetase OS=Bombyx mori OX=7091 GN=101742308 PE=3 SV=1	0	99.835	100		sp|Q8BU30|SYIC_MOUSE	Isoleucine--tRNA ligase, cytoplasmic OS=Mus musculus OX=10090 GN=Iars1 PE=1 SV=2	0	60.246	100
P_KWMTBOMO12682		tr|H9IWG1|H9IWG1_BOMMO	Complex I-B16.6 OS=Bombyx mori OX=7091 PE=3 SV=1	5.53e-112	100	100		sp|Q95KV7|NDUAD_BOVIN	NADH dehydrogenase [ubiquinone] 1 alpha subcomplex subunit 13 OS=Bos taurus OX=9913 GN=NDUFA13 PE=1 SV=3	3.49e-21	40.769	84.9673
P_KWMTBOMO12706		tr|Q5UAQ2|Q5UAQ2_BOMMO	60S ribosomal protein L36 OS=Bombyx mori OX=7091 GN=RpL36 PE=2 SV=1	1.02e-81	100	100		sp|P49630|RL36_DROME	60S ribosomal protein L36 OS=Drosophila melanogaster OX=7227 GN=RpL36 PE=1 SV=1	4.53e-50	71.304	96.6387
P_KWMTBOMO12878		tr|Q0KIX8|Q0KIX8_BOMMO	Glutamate synthase OS=Bombyx mori OX=7091 GN=BmGOGAT PE=2 SV=1	0	99.658	100		sp|Q18164|DPYD_CAEEL	Dihydropyrimidine dehydrogenase [NADP(+)] OS=Caenorhabditis elegans OX=6239 GN=dpyd-1 PE=3 SV=2	2.57e-20	29.206	15.3959
P_KWMTBOMO12902		tr|H9IT95|H9IT95_BOMMO	Calreticulin OS=Bombyx mori OX=7091 PE=3 SV=1	0	100	100		sp|Q7Z1E6|CALR_BOMMO	Calreticulin OS=Bombyx mori OX=7091 GN=crt PE=1 SV=1	0	99.749	100
P_KWMTBOMO12903		tr|H9IT94|H9IT94_BOMMO	CP-type G domain-containing protein OS=Bombyx mori OX=7091 GN=101736688 PE=4 SV=1	0	100	100		sp|Q8MT06|GNL3_DROME	Guanine nucleotide-binding protein-like 3 homolog OS=Drosophila melanogaster OX=7227 GN=Ns1 PE=1 SV=2	4.41e-100	48.179	100
P_KWMTBOMO13301		tr|Q1HQ07|Q1HQ07_BOMMO	1110059p08rik-like protein OS=Bombyx mori OX=7091 GN=732946 PE=2 SV=1	0	100	100		sp|Q32L63|VTA1_BOVIN	Vacuolar protein sorting-associated protein VTA1 homolog OS=Bos taurus OX=9913 GN=VTA1 PE=2 SV=1	8.62e-93	47.352	100
P_KWMTBOMO13520		tr|Q2F5T2|Q2F5T2_BOMMO	Calmodulin OS=Bombyx mori OX=7091 PE=2 SV=1	5.64e-106	100	100		sp|P62153|CALMA_HALRO	Calmodulin-A OS=Halocynthia roretzi OX=7729 PE=1 SV=2	3.68e-105	100	100
P_KWMTBOMO13530		tr|Q5TLU4|Q5TLU4_BOMMO	Superoxide dismutase [Cu-Zn] OS=Bombyx mori OX=7091 GN=Cu/Zn SOD PE=2 SV=2	5.49e-110	100	100		sp|P82205|SODC_BOMMO	Superoxide dismutase [Cu-Zn] OS=Bombyx mori OX=7091 PE=1 SV=3	3.58e-109	100	100
P_KWMTBOMO13597		tr|H9JN56|H9JN56_BOMMO	GOLD domain-containing protein OS=Bombyx mori OX=7091 PE=3 SV=1	8.08e-165	100	100		sp|B4NKL0|TMEDE_DROWI	Transmembrane emp24 domain-containing protein eca OS=Drosophila willistoni OX=7260 GN=eca PE=3 SV=1	1.07e-127	80.952	96.7742
P_KWMTBOMO13712		tr|H9JNA6|H9JNA6_BOMMO	E3 UFM1-protein ligase 1 homolog OS=Bombyx mori OX=7091 PE=3 SV=1	0	99.323	77.2549		sp|Q0IG18|UFL1_AEDAE	E3 UFM1-protein ligase 1 homolog OS=Aedes aegypti OX=7159 GN=AAEL003536 PE=3 SV=1	0	47.135	100
P_KWMTBOMO13713		tr|Q1HPR2|Q1HPR2_BOMMO	Prefoldin subunit 3 OS=Bombyx mori OX=7091 PE=2 SV=1	1.83e-137	98.396	100		sp|Q9VGP6|PFD3_DROME	Prefoldin subunit 3 OS=Drosophila melanogaster OX=7227 GN=mgr PE=1 SV=3	6.3e-70	60.234	91.4439
P_KWMTBOMO13721		tr|A1YM11|A1YM11_BOMMO	CCT-theta OS=Bombyx mori OX=7091 PE=2 SV=1	0	99.45	100		sp|Q6EE31|TCPQ_CHICK	T-complex protein 1 subunit theta OS=Gallus gallus OX=9031 GN=CCT8 PE=1 SV=3	0	63.72	99.633
P_KWMTBOMO13722		tr|H9JPQ0|H9JPQ0_BOMMO	Uncharacterized protein OS=Bombyx mori OX=7091 PE=3 SV=1	2.24e-39	100	73.5632		sp|Q99417|MYCBP_HUMAN	c-Myc-binding protein OS=Homo sapiens OX=9606 GN=MYCBP PE=1 SV=3	2.31e-23	56.944	82.7586
P_KWMTBOMO13723		tr|Q1HPX3|Q1HPX3_BOMMO	ATP synthase subunit O, mitochondrial OS=Bombyx mori OX=7091 PE=2 SV=1	1.17e-152	100	100		sp|Q24439|ATPO_DROME	ATP synthase subunit O, mitochondrial OS=Drosophila melanogaster OX=7227 GN=ATPsynO PE=2 SV=2	7.56e-89	61.692	96.1722
P_KWMTBOMO13729		tr|Q684K3|Q684K3_BOMMO	Protein-synthesizing GTPase OS=Bombyx mori OX=7091 GN=eIF2g PE=2 SV=1	0	100	100		sp|Q24208|IF2G_DROME	Eukaryotic translation initiation factor 2 subunit 3 OS=Drosophila melanogaster OX=7227 GN=eIF2gamma PE=2 SV=1	0	84.12	99.5726
P_KWMTBOMO13800		tr|H9JPL2|H9JPL2_BOMMO	60S ribosomal protein L18a OS=Bombyx mori OX=7091 PE=3 SV=1	4.32e-132	100	100		sp|Q8WQI7|RL18A_SPOFR	60S ribosomal protein L18a OS=Spodoptera frugiperda OX=7108 GN=RpL18A PE=2 SV=1	1.32e-126	95.48	100
P_KWMTBOMO13899		tr|H9JPY4|H9JPY4_BOMMO	Uncharacterized protein OS=Bombyx mori OX=7091 GN=101740613 PE=4 SV=1	1.4e-71	100	100		--	--	--	--	--
P_KWMTBOMO13923		tr|Q19P04|Q19P04_BOMMO	Acyl-coenzyme A dehydrogenase OS=Bombyx mori OX=7091 GN=acade PE=2 SV=1	0	100	100		sp|P45954|ACDSB_HUMAN	Short/branched chain specific acyl-CoA dehydrogenase, mitochondrial OS=Homo sapiens OX=9606 GN=ACADSB PE=1 SV=1	4.38e-162	64.848	99.3976
P_KWMTBOMO13925		tr|H9JP55|H9JP55_BOMMO	Uncharacterized protein OS=Bombyx mori OX=7091 PE=4 SV=1	0	99.927	100		--	--	--	--	--
P_KWMTBOMO14024		tr|H9JPA3|H9JPA3_BOMMO	DJ-1 beta OS=Bombyx mori OX=7091 GN=100422789 PE=2 SV=1	2.25e-138	100	100		sp|Q9VA37|DJ1B_DROME	Protein dj-1beta OS=Drosophila melanogaster OX=7227 GN=dj-1beta PE=1 SV=3	5.03e-67	54.787	98.9474
P_KWMTBOMO14160		tr|H9JPF8|H9JPF8_BOMMO	Iso_dh domain-containing protein OS=Bombyx mori OX=7091 PE=3 SV=1	0	100	100		sp|Q58CP0|IDH3G_BOVIN	Isocitrate dehydrogenase [NAD] subunit gamma, mitochondrial OS=Bos taurus OX=9913 GN=IDH3G PE=2 SV=1	5.17e-132	50.653	98.7113
P_KWMTBOMO14478		tr|H9IS48|H9IS48_BOMMO	Uncharacterized protein OS=Bombyx mori OX=7091 GN=101742289 PE=3 SV=1	1.04e-66	100	100		sp|Q9W1V3|FBRL_DROME	rRNA 2'-O-methyltransferase fibrillarin OS=Drosophila melanogaster OX=7227 GN=Fib PE=2 SV=1	4.31e-61	94.737	100
P_KWMTBOMO14639		tr|Q5UAQ6|Q5UAQ6_BOMMO	60S ribosomal protein L32 OS=Bombyx mori OX=7091 GN=RpL32 PE=2 SV=1	1.84e-97	100	100		sp|Q962T1|RL32_SPOFR	60S ribosomal protein L32 OS=Spodoptera frugiperda OX=7108 GN=RpL32 PE=2 SV=1	6.75e-95	97.761	100
P_KWMTBOMO14715		tr|Q1HPL2|Q1HPL2_BOMMO	Phosphate carrier 1 OS=Bombyx mori OX=7091 GN=PiC PE=2 SV=1	0	100	100		sp|O61703|MPCP_CHOFU	Phosphate carrier protein, mitochondrial OS=Choristoneura fumiferana OX=7141 PE=2 SV=1	0	78.771	100
P_KWMTBOMO14761		tr|H9J2S8|H9J2S8_BOMMO	Dihydrolipoyllysine-residue succinyltransferase component of 2-oxoglutarate dehydrogenase complex, mitochondrial OS=Bombyx mori OX=7091 PE=3 SV=1	0	78.71	100		sp|P11179|ODO2_BOVIN	Dihydrolipoyllysine-residue succinyltransferase component of 2-oxoglutarate dehydrogenase complex, mitochondrial OS=Bos taurus OX=9913 GN=DLST PE=1 SV=2	8.56e-150	56.542	92.043
P_KWMTBOMO14845		tr|Q1HQC8|Q1HQC8_BOMMO	ARP1 actin-related protein 1-like protein A OS=Bombyx mori OX=7091 GN=732868 PE=2 SV=1	0	100	100		sp|P61162|ACTZ_CANLF	Alpha-centractin OS=Canis lupus familiaris OX=9615 GN=ACTR1A PE=2 SV=1	0	81.649	100
P_KWMTBOMO14850		tr|Q1HQ06|Q1HQ06_BOMMO	ATP synthase subunit e, mitochondrial OS=Bombyx mori OX=7091 PE=2 SV=1	2.78e-34	98.305	59.596		--	--	--	--	--
P_KWMTBOMO14877		tr|Q0ZB80|Q0ZB80_BOMMO	eIF2B-beta protein OS=Bombyx mori OX=7091 PE=2 SV=1	0	99.717	100		sp|Q5E9B4|EI2BB_BOVIN	Translation initiation factor eIF-2B subunit beta OS=Bos taurus OX=9913 GN=EIF2B2 PE=2 SV=1	1.5e-63	36.676	98.8669
P_KWMTBOMO14936		tr|H9IU37|H9IU37_BOMMO	GB1/RHD3-type G domain-containing protein OS=Bombyx mori OX=7091 PE=3 SV=1	0	97.695	100		sp|Q9VC57|ATLAS_DROME	Atlastin OS=Drosophila melanogaster OX=7227 GN=atl PE=1 SV=1	0	68.275	97.8221
P_KWMTBOMO14942		tr|H9IU76|H9IU76_BOMMO	AMP deaminase OS=Bombyx mori OX=7091 PE=3 SV=1	0	98.229	97.6064		sp|Q02356|AMPD2_RAT	AMP deaminase 2 OS=Rattus norvegicus OX=10116 GN=Ampd2 PE=1 SV=2	0	59.916	95.2128
P_KWMTBOMO14962		tr|H9IU27|H9IU27_BOMMO	Uncharacterized protein OS=Bombyx mori OX=7091 PE=4 SV=1	0	100	99.4065		sp|Q14690|RRP5_HUMAN	Protein RRP5 homolog OS=Homo sapiens OX=9606 GN=PDCD11 PE=1 SV=3	2.6e-77	28.588	86.8447
P_KWMTBOMO15035		tr|Q2WBZ0|Q2WBZ0_BOMMO	Chlorophyllide A binding protein OS=Bombyx mori OX=7091 GN=chbp PE=2 SV=1	0	94.715	71.0283		sp|P53041|PPP5_HUMAN	Serine/threonine-protein phosphatase 5 OS=Homo sapiens OX=9606 GN=PPP5C PE=1 SV=1	0	63.389	12.6355
P_KWMTBOMO15066		tr|Q2F6A1|Q2F6A1_BOMMO	Electron transfer flavoprotein subunit beta OS=Bombyx mori OX=7091 GN=692811 PE=2 SV=1	0	100	100		sp|Q9DCW4|ETFB_MOUSE	Electron transfer flavoprotein subunit beta OS=Mus musculus OX=10090 GN=Etfb PE=1 SV=3	2.31e-126	69.323	99.2095
P_KWMTBOMO15121		tr|Q0N2R8|Q0N2R8_BOMMO	Signal recognition particle 54 kDa protein OS=Bombyx mori OX=7091 GN=SRP54 PE=2 SV=1	0	99.601	100		sp|Q7ZVN5|SRP54_DANRE	Signal recognition particle 54 kDa protein OS=Danio rerio OX=7955 GN=srp54 PE=2 SV=1	0	80.2	99.8004
P_KWMTBOMO15125		tr|H9J651|H9J651_BOMMO	Adipocyte plasma membrane-associated protein OS=Bombyx mori OX=7091 PE=3 SV=1	0	99.398	94.3262		sp|Q5ZIF1|APMAP_CHICK	Adipocyte plasma membrane-associated protein OS=Gallus gallus OX=9031 GN=APMAP PE=2 SV=1	2.85e-45	32.203	50.2128
P_KWMTBOMO15179		tr|G9I6Y0|G9I6Y0_BOMMO	RING-type E3 ubiquitin transferase OS=Bombyx mori OX=7091 GN=100862840 PE=2 SV=1	0	85.632	100		sp|Q803I8|SYVN1_DANRE	E3 ubiquitin-protein ligase synoviolin OS=Danio rerio OX=7955 GN=syvn1 PE=2 SV=2	3.34e-177	67.761	64.1762
P_KWMTBOMO15198		tr|B5AU20|B5AU20_BOMMO	UDP-glucuronosyltransferase OS=Bombyx mori OX=7091 GN=UGT2 PE=2 SV=1	0	100	100		sp|A0A291PQH4|UGT2_DACCO	UDP-glucosyltransferase 2 OS=Dactylopius coccus OX=765876 GN=UTG2 PE=1 SV=1	2.31e-59	29.352	94.0952
P_KWMTBOMO15341		tr|H9J6I4|H9J6I4_BOMMO	Tryptophanyl-tRNA synthetase OS=Bombyx mori OX=7091 PE=3 SV=1	0	100	74.75		sp|P23381|SYWC_HUMAN	Tryptophan--tRNA ligase, cytoplasmic OS=Homo sapiens OX=9606 GN=WARS1 PE=1 SV=2	0	65.128	97.5
P_KWMTBOMO15357		tr|H9J6H5|H9J6H5_BOMMO	Prolyl-tRNA synthetase OS=Bombyx mori OX=7091 PE=3 SV=1	0	98.315	99.6403		sp|P28668|SYEP_DROME	Bifunctional glutamate/proline--tRNA ligase OS=Drosophila melanogaster OX=7227 GN=GluProRS PE=1 SV=2	0	61.306	99.1607
P_KWMTBOMO15365		tr|B0FRJ4|B0FRJ4_BOMMO	Fibroin heavy chain Fib-h (Fragment) OS=Bombyx mori OX=7091 PE=4 SV=1	4.87e-120	99.351	2.94399		sp|Q99050|FIBH_BOMMA	Fibroin heavy chain (Fragment) OS=Bombyx mandarina OX=7092 GN=FIBH PE=2 SV=2	5.97e-138	97.765	3.42191
P_KWMTBOMO15419		tr|H9J5I6|H9J5I6_BOMMO	Methyltransf_25 domain-containing protein OS=Bombyx mori OX=7091 PE=4 SV=1	0	100	99.1573		sp|Q6PAK3|ANM8_MOUSE	Protein arginine N-methyltransferase 8 OS=Mus musculus OX=10090 GN=Prmt8 PE=1 SV=2	0	71.988	93.2584
P_KWMTBOMO15485		tr|H9JMN2|H9JMN2_BOMMO	Telomere length regulation protein TEL2 homolog OS=Bombyx mori OX=7091 PE=3 SV=1	0	99.857	52.8832		sp|Q14677|EPN4_HUMAN	Clathrin interactor 1 OS=Homo sapiens OX=9606 GN=CLINT1 PE=1 SV=1	9.68e-82	42.982	34.5979
P_KWMTBOMO15518		tr|Q1HPL0|Q1HPL0_BOMMO	26S proteasome regulatory ATPase subunit 10B OS=Bombyx mori OX=7091 PE=2 SV=1	0	100	100		sp|P62334|PRS10_MOUSE	26S proteasome regulatory subunit 10B OS=Mus musculus OX=10090 GN=Psmc6 PE=1 SV=1	0	88.571	97.2222
P_KWMTBOMO15520		tr|H9JMJ8|H9JMJ8_BOMMO	Transcription factor BTF3 OS=Bombyx mori OX=7091 GN=101747148 PE=3 SV=1	7.93e-125	100	100		sp|Q5M8V0|BT3L4_XENTR	Transcription factor BTF3 homolog 4 OS=Xenopus tropicalis OX=8364 GN=btf3l4 PE=2 SV=1	3.16e-70	73.248	90.2299
P_KWMTBOMO15547		tr|H9JMI6|H9JMI6_BOMMO	Nop domain-containing protein OS=Bombyx mori OX=7091 PE=3 SV=1	0	91.939	99.3506		sp|O00567|NOP56_HUMAN	Nucleolar protein 56 OS=Homo sapiens OX=9606 GN=NOP56 PE=1 SV=4	0	66.59	93.9394
P_KWMTBOMO15629		tr|A0A1C9CW41|A0A1C9CW41_BOMMO	Phosphoacetylglucosamine mutase OS=Bombyx mori OX=7091 GN=pgm PE=2 SV=1	0	100	100		sp|O95394|AGM1_HUMAN	Phosphoacetylglucosamine mutase OS=Homo sapiens OX=9606 GN=PGM3 PE=1 SV=1	0	52.354	96.8978
P_KWMTBOMO15665		tr|H9IYF4|H9IYF4_BOMMO	Uncharacterized protein OS=Bombyx mori OX=7091 GN=101736745 PE=4 SV=1	0	100	100		sp|P26305|LPSBP_PERAM	Hemolymph lipopolysaccharide-binding protein OS=Periplaneta americana OX=6978 PE=1 SV=1	3.37e-26	39.716	45.1923
P_KWMTBOMO15675		tr|H9IYG1|H9IYG1_BOMMO	Uncharacterized protein OS=Bombyx mori OX=7091 PE=4 SV=1	0	100	56.6038		sp|Q2M296|MTHSD_HUMAN	Methenyltetrahydrofolate synthase domain-containing protein OS=Homo sapiens OX=9606 GN=MTHFSD PE=1 SV=2	5.55e-81	40.212	79.2453
P_KWMTBOMO15712		tr|Q2F5N9|Q2F5N9_BOMMO	Nucleoplasmin isoform 2 OS=Bombyx mori OX=7091 GN=692956 PE=2 SV=1	7.05e-137	100	100		sp|Q27415|NLP_DROME	Nucleoplasmin-like protein OS=Drosophila melanogaster OX=7227 GN=Nlp PE=1 SV=1	2.34e-29	48.148	57.754
P_KWMTBOMO15757		tr|B3VBE3|B3VBE3_BOMMO	Vacuolar proton pump subunit B OS=Bombyx mori OX=7091 PE=2 SV=1	5.34e-157	100	100		sp|P31401|VATB_MANSE	V-type proton ATPase subunit B OS=Manduca sexta OX=7130 GN=VHA55 PE=2 SV=1	2.9e-155	99.526	100
P_KWMTBOMO15769		tr|H9IYK6|H9IYK6_BOMMO	Uncharacterized protein OS=Bombyx mori OX=7091 GN=101741848 PE=4 SV=1	0	100	100		sp|Q76MZ3|2AAA_MOUSE	Serine/threonine-protein phosphatase 2A 65 kDa regulatory subunit A alpha isoform OS=Mus musculus OX=10090 GN=Ppp2r1a PE=1 SV=3	0	76.581	99.1525
P_KWMTBOMO15781		tr|H9IYL2|H9IYL2_BOMMO	Uncharacterized protein OS=Bombyx mori OX=7091 PE=3 SV=2	0	87.5	100		sp|O46036|CTBP_DROME	C-terminal-binding protein OS=Drosophila melanogaster OX=7227 GN=CtBP PE=1 SV=3	0	91.643	78.9011
P_KWMTBOMO15875		tr|H9JUY0|H9JUY0_BOMMO	Uncharacterized protein OS=Bombyx mori OX=7091 PE=4 SV=1	2.28e-159	100	87.8571		--	--	--	--	--
P_KWMTBOMO15928		tr|Q0N2S4|Q0N2S4_BOMMO	Polyadenylate-binding protein OS=Bombyx mori OX=7091 GN=PAbp PE=2 SV=1	0	99.502	98.5294		sp|P11940|PABP1_HUMAN	Polyadenylate-binding protein 1 OS=Homo sapiens OX=9606 GN=PABPC1 PE=1 SV=2	0	68.454	100
P_KWMTBOMO16000		tr|A0A1Q0AL85|A0A1Q0AL85_BOMMO	Homeostasis protein OS=Bombyx mori OX=7091 GN=IHoP PE=2 SV=1	0	100	100		sp|Q61233|PLSL_MOUSE	Plastin-2 OS=Mus musculus OX=10090 GN=Lcp1 PE=1 SV=4	0	51.823	91.0534
P_KWMTBOMO16126		tr|Q5R1P6|Q5R1P6_BOMMO	Heat shock protein hsp20.1 OS=Bombyx mori OX=7091 GN=Hsp20.1 PE=2 SV=1	3.12e-134	100	100		sp|P82147|L2EFL_DROME	Protein lethal(2)essential for life OS=Drosophila melanogaster OX=7227 GN=l(2)efl PE=1 SV=1	1.62e-53	56.129	87.0787
P_KWMTBOMO16197		tr|Q1HPX4|Q1HPX4_BOMMO	ATP synthase subunit gamma OS=Bombyx mori OX=7091 GN=732965 PE=2 SV=1	0	100	100		sp|O01666|ATPG_DROME	ATP synthase subunit gamma, mitochondrial OS=Drosophila melanogaster OX=7227 GN=ATPsyngamma PE=2 SV=2	2.51e-151	73.05	95.2703
P_KWMTBOMO16204		tr|H9JWQ7|H9JWQ7_BOMMO	CHK domain-containing protein OS=Bombyx mori OX=7091 GN=101744771 PE=4 SV=1	0	100	100		--	--	--	--	--
P_KWMTBOMO16261		tr|Q2F6A0|Q2F6A0_BOMMO	Exuperantia OS=Bombyx mori OX=7091 PE=2 SV=1	0	100	100		sp|Q24747|EXU_DROVI	Maternal protein exuperantia OS=Drosophila virilis OX=7244 GN=exu PE=3 SV=1	5.4e-82	39.231	94.431
P_KWMTBOMO16319		tr|Q2F5K7|Q2F5K7_BOMMO	Receptor expression-enhancing protein OS=Bombyx mori OX=7091 PE=2 SV=1	3.16e-130	99.429	100		sp|Q29RM3|REEP5_BOVIN	Receptor expression-enhancing protein 5 OS=Bos taurus OX=9913 GN=REEP5 PE=2 SV=1	3.07e-59	50.595	96
P_KWMTBOMO16481		tr|Q19KB8|Q19KB8_BOMMO	Ras-related GTP-binding protein Rab11 OS=Bombyx mori OX=7091 GN=733063 PE=2 SV=1	1.33e-160	100	100		sp|P62492|RB11A_MOUSE	Ras-related protein Rab-11A OS=Mus musculus OX=10090 GN=Rab11a PE=1 SV=3	7.02e-129	82.326	100
