# Supplementary material for: New insights into the proteins interacting with the promoters of silkworm fibroin genes
Source: Research Square preprint supplement (doi:10.21203/rs.3.rs-400247/v1), 2021-04-12
Supplement: Supplementary file 4 [file bcafc064a45a007d267829c6.xlsx]

## Sheet: fibH_M4
N	Unused	Total	%Cov	%Cov(50)	%Cov(95)	Accession	Citable Accession	Name	Peptides(95%)
5	20.56	20.56	10.2	6.355	5.017	P_KWMTBOMO08648	P_KWMTBOMO08648	P_KWMTBOMO08648	9
6	19.37	19.37	25.34	22.75	18.17	P_KWMTBOMO08642	P_KWMTBOMO08642	P_KWMTBOMO08642	12
7	16.7	16.7	18.13	13.98	9.005	P_KWMTBOMO11731	P_KWMTBOMO11731	P_KWMTBOMO11731	7
8	16.55	16.55	34.26	26.53	24.75	P_KWMTBOMO07374	P_KWMTBOMO07374	P_KWMTBOMO07374	12
13	13.69	13.69	8.477	6.497	3.401	P_KWMTBOMO10056	P_KWMTBOMO10056	P_KWMTBOMO10056	5
16	12.04	12.04	36.65	25.57	22.73	P_KWMTBOMO05675	P_KWMTBOMO05675	P_KWMTBOMO05675	7
17	11.3	11.3	8.543	8.543	8.543	P_KWMTBOMO15159	P_KWMTBOMO15159	P_KWMTBOMO15159	6
18	11.26	11.26	14.41	9.009	6.757	P_KWMTBOMO00462	P_KWMTBOMO00462	P_KWMTBOMO00462	5
19	11.03	11.03	4.786	3.521	3.205	P_KWMTBOMO06632	P_KWMTBOMO06632	P_KWMTBOMO06632	6
21	10.28	10.28	29.74	21.19	10.78	P_KWMTBOMO11985	P_KWMTBOMO11985	P_KWMTBOMO11985	6
22	10.27	10.27	11.5	7.9	6.8	P_KWMTBOMO13293	P_KWMTBOMO13293	P_KWMTBOMO13293	5
24	10.13	10.13	15.48	13.3	11.48	P_KWMTBOMO00927	P_KWMTBOMO00927	P_KWMTBOMO00927	5
26	9.71	9.71	10.71	10.71	8.613	P_KWMTBOMO12895	P_KWMTBOMO12895	P_KWMTBOMO12895	6
28	9.58	9.58	8.997	6.101	6.101	P_KWMTBOMO01927	P_KWMTBOMO01927	P_KWMTBOMO01927	7
29	9.08	9.08	20.91	16.35	16.35	P_KWMTBOMO13455	P_KWMTBOMO13455	P_KWMTBOMO13455	5
31	8.92	8.92	10.87	10.87	10.87	P_KWMTBOMO04502	P_KWMTBOMO04502	P_KWMTBOMO04502	5
32	8.68	8.68	40.85	35.92	26.76	P_KWMTBOMO07373	P_KWMTBOMO07373	P_KWMTBOMO07373	6
36	8.32	8.32	6.564	6.564	5.695	P_KWMTBOMO11517	P_KWMTBOMO11517	P_KWMTBOMO11517	4
37	8.3	8.3	23.74	17.9	17.51	P_KWMTBOMO08983	P_KWMTBOMO08983	P_KWMTBOMO08983	6
38	8.07	8.07	16.56	11.18	8.387	P_KWMTBOMO05564	P_KWMTBOMO05564	P_KWMTBOMO05564	4
41	7.48	7.48	10.69	6.501	2.908	P_KWMTBOMO04505	P_KWMTBOMO04505	P_KWMTBOMO04505	3
43	7.34	7.34	12.48	8.59	7.293	P_KWMTBOMO11096	P_KWMTBOMO11096	P_KWMTBOMO11096	4
44	6.88	6.88	23.62	15.6	11.7	P_KWMTBOMO09591	P_KWMTBOMO09591	P_KWMTBOMO09591	4
45	6.78	6.78	20.88	19.78	11.72	P_KWMTBOMO09442	P_KWMTBOMO09442	P_KWMTBOMO09442	3
46	6.7	6.7	18.92	11.5	10.02	P_KWMTBOMO01075	P_KWMTBOMO01075	P_KWMTBOMO01075	3
48	6.51	6.51	7.799	7.799	6.685	P_KWMTBOMO10358	P_KWMTBOMO10358	P_KWMTBOMO10358	3
49	6.38	6.38	9.908	8.257	6.972	P_KWMTBOMO13721	P_KWMTBOMO13721	P_KWMTBOMO13721	3
50	6.24	6.24	50	50	35.29	P_KWMTBOMO13569	P_KWMTBOMO13569	P_KWMTBOMO13569	3
51	6.2	6.2	19	15.67	10.67	P_KWMTBOMO14732	P_KWMTBOMO14732	P_KWMTBOMO14732	3
52	6.05	6.05	25.69	15.02	9.881	P_KWMTBOMO12497	P_KWMTBOMO12497	P_KWMTBOMO12497	3
53	6.01	6.01	22.47	13.92	13.92	P_KWMTBOMO09300	P_KWMTBOMO09300	P_KWMTBOMO09300	4
54	6	6	7.503	4.502	4.502	P_KWMTBOMO03177	P_KWMTBOMO03177	P_KWMTBOMO03177	3
55	6	6	23.81	23.81	23.81	P_KWMTBOMO10509	P_KWMTBOMO10509	P_KWMTBOMO10509	5
56	6	6	11.31	11.31	11.31	P_KWMTBOMO00497	P_KWMTBOMO00497	P_KWMTBOMO00497	3
57	5.92	5.92	24.2	20.55	9.589	P_KWMTBOMO05979	P_KWMTBOMO05979	P_KWMTBOMO05979	2
58	5.9	5.9	8.288	7.387	7.387	P_KWMTBOMO03626	P_KWMTBOMO03626	P_KWMTBOMO03626	4
59	5.89	5.89	12.42	5.28	5.28	P_KWMTBOMO00687	P_KWMTBOMO00687	P_KWMTBOMO00687	3
60	5.84	5.84	20	12.89	8.947	P_KWMTBOMO01720	P_KWMTBOMO01720	P_KWMTBOMO01720	3
62	5.74	5.74	15.02	15.02	15.02	P_KWMTBOMO05566	P_KWMTBOMO05566	P_KWMTBOMO05566	3
63	5.64	5.64	9.286	9.286	9.286	P_KWMTBOMO02081	P_KWMTBOMO02081	P_KWMTBOMO02081	3
64	5.54	5.54	5.603	4.75	4.75	P_KWMTBOMO00638	P_KWMTBOMO00638	P_KWMTBOMO00638	3
65	5.43	5.43	20.62	13.4	7.732	P_KWMTBOMO11255	P_KWMTBOMO11255	P_KWMTBOMO11255	2
66	5.3	5.3	6.824	6.824	6.824	P_KWMTBOMO09415	P_KWMTBOMO09415	P_KWMTBOMO09415	3
67	5.19	5.19	27.32	24.59	11.48	P_KWMTBOMO06480	P_KWMTBOMO06480	P_KWMTBOMO06480	2
68	5.16	5.16	19.39	8.511	8.511	P_KWMTBOMO11083	P_KWMTBOMO11083	P_KWMTBOMO11083	3
69	5.12	5.12	3.444	2.497	1.636	P_KWMTBOMO11045	P_KWMTBOMO11045	P_KWMTBOMO11045	3
70	5.09	5.09	9.651	9.651	9.651	P_KWMTBOMO06231	P_KWMTBOMO06231	P_KWMTBOMO06231	3
71	4.97	4.97	13.13	7.505	5.629	P_KWMTBOMO06770	P_KWMTBOMO06770	P_KWMTBOMO06770	3
72	4.65	4.65	20.28	8.986	4.147	P_KWMTBOMO06229	P_KWMTBOMO06229	P_KWMTBOMO06229	2
73	4.57	4.57	34.53	28.78	15.83	P_KWMTBOMO08399	P_KWMTBOMO08399	P_KWMTBOMO08399	2
74	4.48	4.48	15.63	8.851	3.578	P_KWMTBOMO09808	P_KWMTBOMO09808	P_KWMTBOMO09808	2
75	4.29	4.29	4.623	3.015	2.211	P_KWMTBOMO10780	P_KWMTBOMO10780	P_KWMTBOMO10780	2
76	4.19	4.19	9.646	6.431	4.341	P_KWMTBOMO03748	P_KWMTBOMO03748	P_KWMTBOMO03748	2
77	4.07	4.07	8.663	5.241	2.781	P_KWMTBOMO14420	P_KWMTBOMO14420	P_KWMTBOMO14420	2
79	4.02	4.38	13.74	11.83	8.779	P_KWMTBOMO09980	P_KWMTBOMO09980	P_KWMTBOMO09980	2
80	4.02	4.02	6.786	2.595	2.595	P_KWMTBOMO05541	P_KWMTBOMO05541	P_KWMTBOMO05541	2
81	4.02	4.02	4.972	3.125	3.125	P_KWMTBOMO08889	P_KWMTBOMO08889	P_KWMTBOMO08889	3
82	4.01	4.01	6.349	4.762	4.762	P_KWMTBOMO02748	P_KWMTBOMO02748	P_KWMTBOMO02748	2
83	4	4	3.046	1.668	1.668	P_KWMTBOMO14858	P_KWMTBOMO14858	P_KWMTBOMO14858	2
84	4	4	21.55	15.47	15.47	P_KWMTBOMO16637	P_KWMTBOMO16637	P_KWMTBOMO16637	2
85	4	4	7.71	4.907	4.907	P_KWMTBOMO14984	P_KWMTBOMO14984	P_KWMTBOMO14984	3
86	4	4	10.56	7.918	7.918	P_KWMTBOMO13997	P_KWMTBOMO13997	P_KWMTBOMO13997	2
87	4	4	8.04	5.779	5.779	P_KWMTBOMO12166	P_KWMTBOMO12166	P_KWMTBOMO12166	2
88	4	4	10.63	6.54	6.54	P_KWMTBOMO04370	P_KWMTBOMO04370	P_KWMTBOMO04370	2
89	4	4	10.49	7.692	7.692	P_KWMTBOMO03860	P_KWMTBOMO03860	P_KWMTBOMO03860	2
90	4	4	6.624	5.556	5.556	P_KWMTBOMO02470	P_KWMTBOMO02470	P_KWMTBOMO02470	2
91	4	4	7.156	5.65	5.65	P_KWMTBOMO00366	P_KWMTBOMO00366	P_KWMTBOMO00366	2
92	4	4	7.692	7.692	7.692	P_KWMTBOMO11061	P_KWMTBOMO11061	P_KWMTBOMO11061	2
93	4	4	9.477	9.477	9.477	P_KWMTBOMO10248	P_KWMTBOMO10248	P_KWMTBOMO10248	2
95	3.85	3.85	2.228	1.733	1.188	P_KWMTBOMO11868	P_KWMTBOMO11868	P_KWMTBOMO11868	2
96	3.85	3.85	5.251	3.196	3.196	P_KWMTBOMO09621	P_KWMTBOMO09621	P_KWMTBOMO09621	2
97	3.85	3.85	3.26	2.397	2.397	P_KWMTBOMO04806	P_KWMTBOMO04806	P_KWMTBOMO04806	2
98	3.77	3.77	12.05	7.47	6.024	P_KWMTBOMO13979	P_KWMTBOMO13979	P_KWMTBOMO13979	2
99	3.74	3.74	4.746	1.78	1.78	P_KWMTBOMO09542	P_KWMTBOMO09542	P_KWMTBOMO09542	2
100	3.72	3.72	25.13	12.31	12.31	P_KWMTBOMO01320	P_KWMTBOMO01320	P_KWMTBOMO01320	2
101	3.68	3.68	21.65	21.65	21.65	P_KWMTBOMO01918	P_KWMTBOMO01918	P_KWMTBOMO01918	2
102	3.66	3.66	10.19	7.962	7.962	P_KWMTBOMO15758	P_KWMTBOMO15758	P_KWMTBOMO15758	2
103	3.52	3.52	7.794	4.559	2.941	P_KWMTBOMO08652	P_KWMTBOMO08652	P_KWMTBOMO08652	2
104	3.51	3.52	10.8	6.103	6.103	P_KWMTBOMO00437	P_KWMTBOMO00437	P_KWMTBOMO00437	2
105	3.51	3.51	5.847	3.222	3.222	P_KWMTBOMO08213	P_KWMTBOMO08213	P_KWMTBOMO08213	2
106	3.5	3.5	6.329	3.376	2.743	P_KWMTBOMO08343	P_KWMTBOMO08343	P_KWMTBOMO08343	2
107	3.4	3.4	10.23	5.846	5.846	P_KWMTBOMO08956	P_KWMTBOMO08956	P_KWMTBOMO08956	2
108	3.35	3.55	10.26	10.26	7.051	P_KWMTBOMO16357	P_KWMTBOMO16357	P_KWMTBOMO16357	2
109	3.3	3.3	4.834	3.729	3.729	P_KWMTBOMO15359	P_KWMTBOMO15359	P_KWMTBOMO15359	2
110	3.29	3.29	6.356	4.096	4.096	P_KWMTBOMO09050	P_KWMTBOMO09050	P_KWMTBOMO09050	2
111	3.19	3.19	29.27	19.51	19.51	P_KWMTBOMO12287	P_KWMTBOMO12287	P_KWMTBOMO12287	2
112	3.18	3.18	8.841	3.768	3.768	P_KWMTBOMO14549	P_KWMTBOMO14549	P_KWMTBOMO14549	2
114	3.14	3.14	11.15	3.781	3.781	P_KWMTBOMO01606	P_KWMTBOMO01606	P_KWMTBOMO01606	2
115	3.14	3.14	2.439	1.368	1.368	P_KWMTBOMO09747	P_KWMTBOMO09747	P_KWMTBOMO09747	3
116	3.07	3.07	4.264	4.264	4.264	P_KWMTBOMO14752	P_KWMTBOMO14752	P_KWMTBOMO14752	2
117	2.96	2.96	11.99	4.613	1.845	P_KWMTBOMO00793	P_KWMTBOMO00793	P_KWMTBOMO00793	1
118	2.94	2.94	14.02	7.927	7.927	P_KWMTBOMO06082	P_KWMTBOMO06082	P_KWMTBOMO06082	2
119	2.94	2.94	20.9	12.69	5.97	P_KWMTBOMO04742	P_KWMTBOMO04742	P_KWMTBOMO04742	1
120	2.89	2.89	7.482	2.734	1.439	P_KWMTBOMO10493	P_KWMTBOMO10493	P_KWMTBOMO10493	1
121	2.86	2.86	7.648	6.061	2.309	P_KWMTBOMO13567	P_KWMTBOMO13567	P_KWMTBOMO13567	1
122	2.83	3.62	4.962	4.962	1.718	P_KWMTBOMO12560	P_KWMTBOMO12560	P_KWMTBOMO12560	1
123	2.79	2.79	4.57	4.205	4.205	P_KWMTBOMO07294	P_KWMTBOMO07294	P_KWMTBOMO07294	2
124	2.76	2.76	22.55	13.24	3.922	P_KWMTBOMO01273	P_KWMTBOMO01273	P_KWMTBOMO01273	1
126	2.63	2.64	9.793	5.65	2.448	P_KWMTBOMO02994	P_KWMTBOMO02994	P_KWMTBOMO02994	1
127	2.59	2.59	24.05	15.82	8.228	P_KWMTBOMO14479	P_KWMTBOMO14479	P_KWMTBOMO14479	1
128	2.45	2.45	6.319	3.318	1.738	P_KWMTBOMO06803	P_KWMTBOMO06803	P_KWMTBOMO06803	1
129	2.42	3.15	6.914	3.827	1.481	P_KWMTBOMO12844	P_KWMTBOMO12844	P_KWMTBOMO12844	1
130	2.42	2.42	8.442	8.442	8.442	P_KWMTBOMO16524	P_KWMTBOMO16524	P_KWMTBOMO16524	2
132	2.31	2.31	17.62	13.41	4.215	P_KWMTBOMO07688	P_KWMTBOMO07688	P_KWMTBOMO07688	1
133	2.27	2.27	16.78	12.59	12.59	P_KWMTBOMO08666	P_KWMTBOMO08666	P_KWMTBOMO08666	2
134	2.23	2.24	36.97	19.33	8.403	P_KWMTBOMO15114	P_KWMTBOMO15114	P_KWMTBOMO15114	1
135	2.21	2.21	2.128	0.3676	0.2515	P_KWMTBOMO08740	P_KWMTBOMO08740	P_KWMTBOMO08740	1
136	2.2	2.2	21.94	13.55	8.387	P_KWMTBOMO05068	P_KWMTBOMO05068	P_KWMTBOMO05068	2
137	2.19	2.19	5.747	5.747	3.218	P_KWMTBOMO09054	P_KWMTBOMO09054	P_KWMTBOMO09054	1
138	2.18	2.18	5.609	3.56	1.079	P_KWMTBOMO04610	P_KWMTBOMO04610	P_KWMTBOMO04610	1
139	2.17	2.18	12.69	7.308	7.308	P_KWMTBOMO13405	P_KWMTBOMO13405	P_KWMTBOMO13405	1
140	2.17	2.17	2.595	0.8949	0.5369	P_KWMTBOMO05728	P_KWMTBOMO05728	P_KWMTBOMO05728	1
142	2.11	2.12	6.687	3.647	3.647	P_KWMTBOMO08776	P_KWMTBOMO08776	P_KWMTBOMO08776	1
143	2.11	2.11	8.199	2.251	2.251	P_KWMTBOMO02432	P_KWMTBOMO02432	P_KWMTBOMO02432	1
144	2.11	2.11	4.218	2.481	2.481	P_KWMTBOMO11098	P_KWMTBOMO11098	P_KWMTBOMO11098	1
145	2.07	2.07	5.316	2.532	2.532	P_KWMTBOMO08310	P_KWMTBOMO08310	P_KWMTBOMO08310	1
146	2.04	2.04	3.473	0.9471	0.9471	P_KWMTBOMO03067	P_KWMTBOMO03067	P_KWMTBOMO03067	1
147	2.04	2.04	2.152	1.133	1.133	P_KWMTBOMO08045	P_KWMTBOMO08045	P_KWMTBOMO08045	1
148	2.03	2.03	5.38	3.323	3.323	P_KWMTBOMO08044	P_KWMTBOMO08044	P_KWMTBOMO08044	1
149	2.02	2.02	4.979	1.245	1.245	P_KWMTBOMO05741	P_KWMTBOMO05741	P_KWMTBOMO05741	1
151	2.02	2.02	1.892	0.9461	0.9461	P_KWMTBOMO01790	P_KWMTBOMO01790	P_KWMTBOMO01790	1
152	2.01	2.01	13.31	2.823	2.823	P_KWMTBOMO12037	P_KWMTBOMO12037	P_KWMTBOMO12037	1
153	2.01	2.01	21.33	7.333	7.333	P_KWMTBOMO04504	P_KWMTBOMO04504	P_KWMTBOMO04504	1
154	2.01	2.01	3.743	2.273	2.273	P_KWMTBOMO16130	P_KWMTBOMO16130	P_KWMTBOMO16130	1
155	2	4	5.492	5.492	5.492	P_KWMTBOMO15123	P_KWMTBOMO15123	P_KWMTBOMO15123	2
156	2	2	5.185	2.407	2.407	P_KWMTBOMO12659	P_KWMTBOMO12659	P_KWMTBOMO12659	1
157	2	2	7.292	1.786	1.786	P_KWMTBOMO08865	P_KWMTBOMO08865	P_KWMTBOMO08865	1
158	2	2	3.072	1.097	1.097	P_KWMTBOMO02211	P_KWMTBOMO02211	P_KWMTBOMO02211	1
159	2	2	5.658	2.079	2.079	P_KWMTBOMO01030	P_KWMTBOMO01030	P_KWMTBOMO01030	1
160	2	2	11.03	5.897	5.897	P_KWMTBOMO16309	P_KWMTBOMO16309	P_KWMTBOMO16309	1
161	2	2	2.22	0.793	0.793	P_KWMTBOMO14773	P_KWMTBOMO14773	P_KWMTBOMO14773	1
162	2	2	3.412	1.386	1.386	P_KWMTBOMO12667	P_KWMTBOMO12667	P_KWMTBOMO12667	1
163	2	2	5.736	1.912	1.912	P_KWMTBOMO12264	P_KWMTBOMO12264	P_KWMTBOMO12264	1
165	2	2	4.069	1.322	1.322	P_KWMTBOMO08404	P_KWMTBOMO08404	P_KWMTBOMO08404	1
166	2	2	14.98	6.763	6.763	P_KWMTBOMO08106	P_KWMTBOMO08106	P_KWMTBOMO08106	1
167	2	2	5.921	1.809	1.809	P_KWMTBOMO06787	P_KWMTBOMO06787	P_KWMTBOMO06787	1
168	2	2	3.793	1.77	1.77	P_KWMTBOMO05612	P_KWMTBOMO05612	P_KWMTBOMO05612	1
169	2	2	7.143	5.76	2.995	P_KWMTBOMO01114	P_KWMTBOMO01114	P_KWMTBOMO01114	1
170	2	2	6.534	3.977	3.977	P_KWMTBOMO16530	P_KWMTBOMO16530	P_KWMTBOMO16530	1
171	2	2	3.933	1.545	1.545	P_KWMTBOMO13226	P_KWMTBOMO13226	P_KWMTBOMO13226	1
172	2	2	2.282	1.091	1.091	P_KWMTBOMO12350	P_KWMTBOMO12350	P_KWMTBOMO12350	1
173	2	2	5.53	2.765	2.765	P_KWMTBOMO12165	P_KWMTBOMO12165	P_KWMTBOMO12165	1
174	2	2	6.627	3.614	3.614	P_KWMTBOMO12057	P_KWMTBOMO12057	P_KWMTBOMO12057	1
175	2	2	12.62	6.542	6.542	P_KWMTBOMO11448	P_KWMTBOMO11448	P_KWMTBOMO11448	1
176	2	2	6.444	3.333	3.333	P_KWMTBOMO10283	P_KWMTBOMO10283	P_KWMTBOMO10283	1
177	2	2	5.103	1.823	1.823	P_KWMTBOMO09057	P_KWMTBOMO09057	P_KWMTBOMO09057	1
178	2	2	3.361	2.101	2.101	P_KWMTBOMO09034	P_KWMTBOMO09034	P_KWMTBOMO09034	1
179	2	2	19.61	11.11	11.11	P_KWMTBOMO08820	P_KWMTBOMO08820	P_KWMTBOMO08820	1
180	2	2	3.52	2.347	2.347	P_KWMTBOMO07380	P_KWMTBOMO07380	P_KWMTBOMO07380	1
181	2	2	3.337	1.891	1.891	P_KWMTBOMO07274	P_KWMTBOMO07274	P_KWMTBOMO07274	1
182	2	2	19.23	12.5	12.5	P_KWMTBOMO06974	P_KWMTBOMO06974	P_KWMTBOMO06974	1
183	2	2	5.176	2.484	2.484	P_KWMTBOMO06731	P_KWMTBOMO06731	P_KWMTBOMO06731	1
184	2	2	2.382	0.8777	0.8777	P_KWMTBOMO06482	P_KWMTBOMO06482	P_KWMTBOMO06482	1
185	2	2	6.005	3.695	3.695	P_KWMTBOMO04605	P_KWMTBOMO04605	P_KWMTBOMO04605	1
186	2	2	5.458	3.509	3.509	P_KWMTBOMO00881	P_KWMTBOMO00881	P_KWMTBOMO00881	1
187	2	2	19.31	9.653	9.653	P_KWMTBOMO00339	P_KWMTBOMO00339	P_KWMTBOMO00339	1
188	2	2	4.815	4.815	4.815	P_KWMTBOMO15867	P_KWMTBOMO15867	P_KWMTBOMO15867	1
190	2	2	2.935	2.935	2.935	P_KWMTBOMO14804	P_KWMTBOMO14804	P_KWMTBOMO14804	1
191	2	2	12.16	12.16	12.16	P_KWMTBOMO14440	P_KWMTBOMO14440	P_KWMTBOMO14440	1
193	2	2	5.292	5.292	5.292	P_KWMTBOMO08607	P_KWMTBOMO08607	P_KWMTBOMO08607	1
194	2	2	2.494	2.494	2.494	P_KWMTBOMO08194	P_KWMTBOMO08194	P_KWMTBOMO08194	1
195	2	2	17.39	17.39	17.39	P_KWMTBOMO08193	P_KWMTBOMO08193	P_KWMTBOMO08193	1
196	2	2	6.757	6.757	6.757	P_KWMTBOMO07930	P_KWMTBOMO07930	P_KWMTBOMO07930	1
197	2	2	3.886	3.886	3.886	P_KWMTBOMO07780	P_KWMTBOMO07780	P_KWMTBOMO07780	1
198	2	2	2.111	2.111	2.111	P_KWMTBOMO07076	P_KWMTBOMO07076	P_KWMTBOMO07076	1
199	2	2	4.893	4.893	4.893	P_KWMTBOMO06056	P_KWMTBOMO06056	P_KWMTBOMO06056	1
200	2	2	5.072	5.072	5.072	P_KWMTBOMO05975	P_KWMTBOMO05975	P_KWMTBOMO05975	1
201	2	2	2.369	2.369	2.369	P_KWMTBOMO05205	P_KWMTBOMO05205	P_KWMTBOMO05205	1
202	2	2	0.3514	0.3514	0.3514	P_KWMTBOMO05179	P_KWMTBOMO05179	P_KWMTBOMO05179	1
203	2	2	9.524	9.524	9.524	P_KWMTBOMO03601	P_KWMTBOMO03601	P_KWMTBOMO03601	1
204	2	2	3.686	3.686	3.686	P_KWMTBOMO02835	P_KWMTBOMO02835	P_KWMTBOMO02835	1
205	2	2	7.895	7.895	7.895	P_KWMTBOMO02059	P_KWMTBOMO02059	P_KWMTBOMO02059	1
207	2	2	11.72	11.72	11.72	P_KWMTBOMO00786	P_KWMTBOMO00786	P_KWMTBOMO00786	1
208	1.92	2	7.692	7.692	7.692	P_KWMTBOMO13859	P_KWMTBOMO13859	P_KWMTBOMO13859	1
209	1.89	1.89	4.651	4.651	4.651	P_KWMTBOMO09390	P_KWMTBOMO09390	P_KWMTBOMO09390	1
210	1.82	1.82	5.074	1.903	1.903	P_KWMTBOMO12205	P_KWMTBOMO12205	P_KWMTBOMO12205	1
211	1.81	2.17	41.96	41.96	36.61	P_KWMTBOMO09230	P_KWMTBOMO09230	P_KWMTBOMO09230	2
212	1.8	1.8	27.15	6.623	6.623	P_KWMTBOMO13960	P_KWMTBOMO13960	P_KWMTBOMO13960	1
213	1.77	1.77	3.96	3.96	2.772	P_KWMTBOMO11276	P_KWMTBOMO11276	P_KWMTBOMO11276	1
214	1.74	1.74	16.93	3.448	3.448	P_KWMTBOMO01148	P_KWMTBOMO01148	P_KWMTBOMO01148	1
215	1.73	1.73	12.4	6.977	6.977	P_KWMTBOMO03173	P_KWMTBOMO03173	P_KWMTBOMO03173	1
216	1.72	1.72	0.6018	0.3484	0.3484	P_KWMTBOMO11519	P_KWMTBOMO11519	P_KWMTBOMO11519	1
217	1.7	1.7	2.583	0.9298	0.9298	P_KWMTBOMO07589	P_KWMTBOMO07589	P_KWMTBOMO07589	1
218	1.7	1.7	27.27	11.11	11.11	P_KWMTBOMO02431	P_KWMTBOMO02431	P_KWMTBOMO02431	2
219	1.68	1.68	3	3	3	P_KWMTBOMO08926	P_KWMTBOMO08926	P_KWMTBOMO08926	1
220	1.68	1.68	0.3481	0.3481	0.3481	P_KWMTBOMO05680	P_KWMTBOMO05680	P_KWMTBOMO05680	1
221	1.64	1.64	12.58	6.954	3.311	P_KWMTBOMO12389	P_KWMTBOMO12389	P_KWMTBOMO12389	1
222	1.64	1.64	3.918	3.918	1.493	P_KWMTBOMO07855	P_KWMTBOMO07855	P_KWMTBOMO07855	1
223	1.62	1.62	7.463	7.463	7.463	P_KWMTBOMO04691	P_KWMTBOMO04691	P_KWMTBOMO04691	1
224	1.47	1.47	19.61	4.412	4.412	P_KWMTBOMO03314	P_KWMTBOMO03314	P_KWMTBOMO03314	1
225	1.47	1.47	8.978	2.786	2.786	P_KWMTBOMO03986	P_KWMTBOMO03986	P_KWMTBOMO03986	1
226	1.46	1.47	2.432	2.432	2.432	P_KWMTBOMO15584	P_KWMTBOMO15584	P_KWMTBOMO15584	1
227	1.45	1.45	23.27	12.58	7.547	P_KWMTBOMO08100	P_KWMTBOMO08100	P_KWMTBOMO08100	1
228	1.44	1.44	3.647	3.647	1.403	P_KWMTBOMO11336	P_KWMTBOMO11336	P_KWMTBOMO11336	1
229	1.43	1.43	2.61	1.461	1.461	P_KWMTBOMO14568	P_KWMTBOMO14568	P_KWMTBOMO14568	1
230	1.43	1.43	5.571	5.571	3.621	P_KWMTBOMO02894	P_KWMTBOMO02894	P_KWMTBOMO02894	1
231	1.37	1.37	2.722	1.815	1.815	P_KWMTBOMO14936	P_KWMTBOMO14936	P_KWMTBOMO14936	1
232	1.35	1.35	4.18	4.18	4.18	P_KWMTBOMO01312	P_KWMTBOMO01312	P_KWMTBOMO01312	1

## Sheet: fibH_L5D5
N	Unused	Total	%Cov	%Cov(50)	%Cov(95)	Accession	Citable Accession	Name	Peptides(95%)
2	41.03	41.03	38.47	34.05	32.52	P_KWMTBOMO08642	P_KWMTBOMO08642	P_KWMTBOMO08642	24
3	39.75	39.75	50.46	44.7	39.4	P_KWMTBOMO06229	P_KWMTBOMO06229	P_KWMTBOMO06229	22
4	38.76	38.76	31.23	25.34	21.23	P_KWMTBOMO05687	P_KWMTBOMO05687	P_KWMTBOMO05687	21
5	38.25	38.25	31.53	28.27	25.68	P_KWMTBOMO00462	P_KWMTBOMO00462	P_KWMTBOMO00462	22
10	32.69	32.69	26.5	23.3	20	P_KWMTBOMO13293	P_KWMTBOMO13293	P_KWMTBOMO13293	17
12	30.69	30.69	26.13	25.27	17.49	P_KWMTBOMO09597	P_KWMTBOMO09597	P_KWMTBOMO09597	13
17	25.71	25.71	48.74	48.74	44.03	P_KWMTBOMO05178	P_KWMTBOMO05178	P_KWMTBOMO05178	15
20	24.32	24.32	43.87	39.41	33.09	P_KWMTBOMO11985	P_KWMTBOMO11985	P_KWMTBOMO11985	16
23	20.85	20.85	18.44	14.97	10.83	P_KWMTBOMO10816	P_KWMTBOMO10816	P_KWMTBOMO10816	9
25	20.28	20.28	48.97	38.14	33.51	P_KWMTBOMO11255	P_KWMTBOMO11255	P_KWMTBOMO11255	10
26	20	20	15.99	13.58	12.05	P_KWMTBOMO15159	P_KWMTBOMO15159	P_KWMTBOMO15159	11
27	19.94	19.94	24.51	15.38	10.29	P_KWMTBOMO06595	P_KWMTBOMO06595	P_KWMTBOMO06595	8
28	19.87	19.87	49.05	42.59	34.98	P_KWMTBOMO13455	P_KWMTBOMO13455	P_KWMTBOMO13455	11
29	19.83	19.83	25.45	23.99	19.45	P_KWMTBOMO11096	P_KWMTBOMO11096	P_KWMTBOMO11096	10
31	18.92	18.92	60.93	55.63	55.63	P_KWMTBOMO08440	P_KWMTBOMO08440	P_KWMTBOMO08440	9
34	17.92	17.92	42.2	39.14	36.39	P_KWMTBOMO06763	P_KWMTBOMO06763	P_KWMTBOMO06763	11
38	17.18	17.18	28.82	25.72	22.62	P_KWMTBOMO03092	P_KWMTBOMO03092	P_KWMTBOMO03092	9
40	16.81	16.81	25.71	21.52	17.71	P_KWMTBOMO15198	P_KWMTBOMO15198	P_KWMTBOMO15198	13
41	16.75	16.75	74.11	59.82	59.82	P_KWMTBOMO09876	P_KWMTBOMO09876	P_KWMTBOMO09876	10
44	16.23	16.23	22.17	14.37	10.96	P_KWMTBOMO00638	P_KWMTBOMO00638	P_KWMTBOMO00638	10
46	16.05	16.05	31.68	28.37	19.86	P_KWMTBOMO11083	P_KWMTBOMO11083	P_KWMTBOMO11083	9
47	15.9	15.9	38.55	37.79	33.59	P_KWMTBOMO08464	P_KWMTBOMO08464	P_KWMTBOMO08464	13
48	15.31	15.31	39.17	39.17	39.17	P_KWMTBOMO09232	P_KWMTBOMO09232	P_KWMTBOMO09232	10
50	15.17	15.17	24.54	20.88	15.02	P_KWMTBOMO09442	P_KWMTBOMO09442	P_KWMTBOMO09442	8
52	14.93	14.93	18.24	18.24	16.54	P_KWMTBOMO13370	P_KWMTBOMO13370	P_KWMTBOMO13370	11
53	14.45	14.45	14.23	11.27	8.787	P_KWMTBOMO09055	P_KWMTBOMO09055	P_KWMTBOMO09055	7
54	14	14	32.97	29.4	27.2	P_KWMTBOMO09553	P_KWMTBOMO09553	P_KWMTBOMO09553	7
55	13.97	13.97	34.77	32.78	29.14	P_KWMTBOMO12389	P_KWMTBOMO12389	P_KWMTBOMO12389	8
57	13.82	13.82	34.87	34.87	34.87	P_KWMTBOMO07688	P_KWMTBOMO07688	P_KWMTBOMO07688	8
58	13.79	13.79	20.53	18.27	13.75	P_KWMTBOMO09808	P_KWMTBOMO09808	P_KWMTBOMO09808	6
59	13.51	13.51	24.95	18.58	18.58	P_KWMTBOMO00927	P_KWMTBOMO00927	P_KWMTBOMO00927	7
61	13.02	13.02	21.19	17.86	17.86	P_KWMTBOMO02081	P_KWMTBOMO02081	P_KWMTBOMO02081	11
62	12.77	12.77	22.18	14.27	12.35	P_KWMTBOMO15357	P_KWMTBOMO15357	P_KWMTBOMO15357	7
63	12.71	12.71	31.33	28.33	24	P_KWMTBOMO14732	P_KWMTBOMO14732	P_KWMTBOMO14732	7
66	12.03	12.03	15.76	13.03	13.03	P_KWMTBOMO12895	P_KWMTBOMO12895	P_KWMTBOMO12895	11
67	12	12	12.5	12.5	12.5	P_KWMTBOMO07855	P_KWMTBOMO07855	P_KWMTBOMO07855	6
68	11.96	11.96	14.17	8.483	8.483	P_KWMTBOMO05541	P_KWMTBOMO05541	P_KWMTBOMO05541	7
69	11.9	11.9	46.33	38.42	33.33	P_KWMTBOMO13800	P_KWMTBOMO13800	P_KWMTBOMO13800	6
70	11.72	12.75	26.91	16.41	15.27	P_KWMTBOMO12560	P_KWMTBOMO12560	P_KWMTBOMO12560	6
71	11.7	11.7	31.08	31.08	25.34	P_KWMTBOMO16197	P_KWMTBOMO16197	P_KWMTBOMO16197	6
72	11.38	11.38	26	23.4	21.51	P_KWMTBOMO00375	P_KWMTBOMO00375	P_KWMTBOMO00375	6
73	11.37	11.37	7.609	4.055	3.679	P_KWMTBOMO08648	P_KWMTBOMO08648	P_KWMTBOMO08648	7
74	11.23	11.23	16.39	16.39	14.38	P_KWMTBOMO04502	P_KWMTBOMO04502	P_KWMTBOMO04502	6
76	11.05	11.05	6.467	5.163	3.478	P_KWMTBOMO12285	P_KWMTBOMO12285	P_KWMTBOMO12285	6
77	10.82	10.82	45.95	37.39	37.39	P_KWMTBOMO01424	P_KWMTBOMO01424	P_KWMTBOMO01424	10
78	10.79	10.79	24.7	24.7	19.88	P_KWMTBOMO01182	P_KWMTBOMO01182	P_KWMTBOMO01182	5
79	10.62	10.62	17.52	16.45	14.32	P_KWMTBOMO02470	P_KWMTBOMO02470	P_KWMTBOMO02470	5
80	10.21	10.21	22.61	15.83	15.83	P_KWMTBOMO12166	P_KWMTBOMO12166	P_KWMTBOMO12166	5
81	10.19	10.19	22.88	22.88	22.88	P_KWMTBOMO10248	P_KWMTBOMO10248	P_KWMTBOMO10248	8
82	10.14	10.14	40	40	34.29	P_KWMTBOMO00838	P_KWMTBOMO00838	P_KWMTBOMO00838	8
83	10.09	10.09	23.08	23.08	23.08	P_KWMTBOMO08666	P_KWMTBOMO08666	P_KWMTBOMO08666	5
84	10.05	10.05	55.35	40.88	40.88	P_KWMTBOMO08100	P_KWMTBOMO08100	P_KWMTBOMO08100	6
85	10.04	10.05	25.71	23.51	16.3	P_KWMTBOMO01148	P_KWMTBOMO01148	P_KWMTBOMO01148	6
87	9.85	9.85	35.47	35.47	30.81	P_KWMTBOMO02278	P_KWMTBOMO02278	P_KWMTBOMO02278	5
88	9.85	9.85	28.18	28.18	28.18	P_KWMTBOMO16637	P_KWMTBOMO16637	P_KWMTBOMO16637	5
89	9.84	9.84	9.578	6.068	3.926	P_KWMTBOMO09747	P_KWMTBOMO09747	P_KWMTBOMO09747	5
90	9.8	9.8	32.42	26.48	20.09	P_KWMTBOMO05979	P_KWMTBOMO05979	P_KWMTBOMO05979	5
91	9.77	9.77	8.922	8.922	7.879	P_KWMTBOMO14157	P_KWMTBOMO14157	P_KWMTBOMO14157	6
92	9.57	9.57	16.17	16.17	16.17	P_KWMTBOMO12461	P_KWMTBOMO12461	P_KWMTBOMO12461	6
93	9.52	9.52	26.05	15.53	15.53	P_KWMTBOMO01720	P_KWMTBOMO01720	P_KWMTBOMO01720	6
94	9.49	9.49	42.57	34.65	34.65	P_KWMTBOMO15361	P_KWMTBOMO15361	P_KWMTBOMO15361	6
95	9.38	9.38	36.88	23.13	23.13	P_KWMTBOMO07772	P_KWMTBOMO07772	P_KWMTBOMO07772	5
96	9.35	9.35	14.13	1.281	1.281	P_KWMTBOMO15365	P_KWMTBOMO15365	P_KWMTBOMO15365	5
97	9.25	9.25	22.85	17.19	12.58	P_KWMTBOMO15675	P_KWMTBOMO15675	P_KWMTBOMO15675	6
98	9.2	9.2	15.31	15.31	9.594	P_KWMTBOMO14887	P_KWMTBOMO14887	P_KWMTBOMO14887	5
99	9.17	9.17	23.22	18.85	15.86	P_KWMTBOMO09054	P_KWMTBOMO09054	P_KWMTBOMO09054	5
100	9.08	9.08	21.1	18.35	18.35	P_KWMTBOMO00497	P_KWMTBOMO00497	P_KWMTBOMO00497	5
101	9.03	9.03	36.59	36.59	36.59	P_KWMTBOMO12287	P_KWMTBOMO12287	P_KWMTBOMO12287	6
103	8.52	8.52	9.313	6.314	5.446	P_KWMTBOMO03067	P_KWMTBOMO03067	P_KWMTBOMO03067	5
104	8.44	8.44	11.16	7.541	6.508	P_KWMTBOMO07589	P_KWMTBOMO07589	P_KWMTBOMO07589	4
105	8.41	8.41	21.66	21.66	17.97	P_KWMTBOMO08596	P_KWMTBOMO08596	P_KWMTBOMO08596	4
106	8.22	8.22	17.51	11.16	7.91	P_KWMTBOMO09050	P_KWMTBOMO09050	P_KWMTBOMO09050	4
107	8.14	8.14	20.79	11.92	11.92	P_KWMTBOMO14984	P_KWMTBOMO14984	P_KWMTBOMO14984	6
108	8.13	8.13	16.57	12.29	12.29	P_KWMTBOMO07323	P_KWMTBOMO07323	P_KWMTBOMO07323	4
109	8.08	8.08	17.41	13.16	13.16	P_KWMTBOMO11680	P_KWMTBOMO11680	P_KWMTBOMO11680	5
110	8.06	8.06	7.587	5.119	5.119	P_KWMTBOMO09183	P_KWMTBOMO09183	P_KWMTBOMO09183	4
111	8.05	8.05	23.78	23.78	23.78	P_KWMTBOMO11678	P_KWMTBOMO11678	P_KWMTBOMO11678	4
112	8	8.22	53.78	37.82	32.77	P_KWMTBOMO15114	P_KWMTBOMO15114	P_KWMTBOMO15114	7
113	8	8	9.025	4.876	4.876	P_KWMTBOMO05741	P_KWMTBOMO05741	P_KWMTBOMO05741	4
114	8	8	20.71	14.17	14.17	P_KWMTBOMO04370	P_KWMTBOMO04370	P_KWMTBOMO04370	4
116	7.88	7.88	12.62	9.833	9.833	P_KWMTBOMO01075	P_KWMTBOMO01075	P_KWMTBOMO01075	5
117	7.67	7.67	20.55	20.55	20.09	P_KWMTBOMO08894	P_KWMTBOMO08894	P_KWMTBOMO08894	5
118	7.64	7.64	14.59	13.69	10.09	P_KWMTBOMO03626	P_KWMTBOMO03626	P_KWMTBOMO03626	4
119	7.62	7.62	30.6	30.6	24.04	P_KWMTBOMO06480	P_KWMTBOMO06480	P_KWMTBOMO06480	4
120	7.58	7.58	12.05	8.075	5.342	P_KWMTBOMO11666	P_KWMTBOMO11666	P_KWMTBOMO11666	4
121	7.51	7.51	33.11	32.45	27.81	P_KWMTBOMO13960	P_KWMTBOMO13960	P_KWMTBOMO13960	4
122	7.47	7.47	6.353	5.528	3.713	P_KWMTBOMO12628	P_KWMTBOMO12628	P_KWMTBOMO12628	4
123	7.19	7.19	25.38	21.15	12.69	P_KWMTBOMO07103	P_KWMTBOMO07103	P_KWMTBOMO07103	4
124	7.14	7.14	14.21	9.779	6.642	P_KWMTBOMO00793	P_KWMTBOMO00793	P_KWMTBOMO00793	4
125	7.03	7.03	4.413	1.981	1.32	P_KWMTBOMO07761	P_KWMTBOMO07761	P_KWMTBOMO07761	4
126	6.88	6.88	44.12	44.12	29.41	P_KWMTBOMO13569	P_KWMTBOMO13569	P_KWMTBOMO13569	5
127	6.87	6.87	7.035	4.925	3.92	P_KWMTBOMO10780	P_KWMTBOMO10780	P_KWMTBOMO10780	3
128	6.84	6.84	16.57	16.57	16.57	P_KWMTBOMO10129	P_KWMTBOMO10129	P_KWMTBOMO10129	4
129	6.74	6.74	35.25	28.06	21.58	P_KWMTBOMO08399	P_KWMTBOMO08399	P_KWMTBOMO08399	4
130	6.66	6.66	10.25	10.25	6.205	P_KWMTBOMO16000	P_KWMTBOMO16000	P_KWMTBOMO16000	3
131	6.54	6.54	19.12	19.12	18.63	P_KWMTBOMO03314	P_KWMTBOMO03314	P_KWMTBOMO03314	5
132	6.46	6.46	32.62	22.99	18.72	P_KWMTBOMO12428	P_KWMTBOMO12428	P_KWMTBOMO12428	3
133	6.39	6.39	38.42	38.42	32.63	P_KWMTBOMO03113	P_KWMTBOMO03113	P_KWMTBOMO03113	4
134	6.25	6.25	9.277	5.286	3.236	P_KWMTBOMO04610	P_KWMTBOMO04610	P_KWMTBOMO04610	3
135	6.22	6.22	25.18	25.18	18.61	P_KWMTBOMO01796	P_KWMTBOMO01796	P_KWMTBOMO01796	3
136	6.08	6.08	27	26.5	17.5	P_KWMTBOMO02477	P_KWMTBOMO02477	P_KWMTBOMO02477	5
137	6.02	6.02	31.09	23.32	23.32	P_KWMTBOMO05281	P_KWMTBOMO05281	P_KWMTBOMO05281	4
138	6.02	6.02	32.62	29.41	29.41	P_KWMTBOMO07857	P_KWMTBOMO07857	P_KWMTBOMO07857	3
139	6	6	7.931	4.052	4.052	P_KWMTBOMO01806	P_KWMTBOMO01806	P_KWMTBOMO01806	3
140	6	6	9.007	6.697	6.697	P_KWMTBOMO04605	P_KWMTBOMO04605	P_KWMTBOMO04605	3
141	6	6	24.84	24.84	24.84	P_KWMTBOMO08820	P_KWMTBOMO08820	P_KWMTBOMO08820	4
142	6	6	8.946	8.946	8.946	P_KWMTBOMO08204	P_KWMTBOMO08204	P_KWMTBOMO08204	3
143	5.95	5.95	10.07	10.07	8.009	P_KWMTBOMO06660	P_KWMTBOMO06660	P_KWMTBOMO06660	4
144	5.91	5.91	13.98	13.98	13.98	P_KWMTBOMO10965	P_KWMTBOMO10965	P_KWMTBOMO10965	4
145	5.9	8.31	13.82	10.57	6.736	P_KWMTBOMO00427	P_KWMTBOMO00427	P_KWMTBOMO00427	5
146	5.89	5.9	9.915	3.559	2.458	P_KWMTBOMO09542	P_KWMTBOMO09542	P_KWMTBOMO09542	3
147	5.8	5.8	19.63	19.63	19.63	P_KWMTBOMO11448	P_KWMTBOMO11448	P_KWMTBOMO11448	3
148	5.74	5.74	43.04	16.46	16.46	P_KWMTBOMO14479	P_KWMTBOMO14479	P_KWMTBOMO14479	3
149	5.62	5.62	28.95	20	14.74	P_KWMTBOMO12018	P_KWMTBOMO12018	P_KWMTBOMO12018	3
150	5.61	5.76	12.04	12.04	10.54	P_KWMTBOMO14761	P_KWMTBOMO14761	P_KWMTBOMO14761	5
151	5.51	5.51	53.1	32.74	32.74	P_KWMTBOMO08961	P_KWMTBOMO08961	P_KWMTBOMO08961	4
152	5.4	5.4	12.74	12.74	10.51	P_KWMTBOMO15758	P_KWMTBOMO15758	P_KWMTBOMO15758	4
153	5.39	5.39	7.529	7.529	7.529	P_KWMTBOMO09415	P_KWMTBOMO09415	P_KWMTBOMO09415	4
154	5.32	5.32	13.66	13.66	13.66	P_KWMTBOMO01431	P_KWMTBOMO01431	P_KWMTBOMO01431	3
155	5.28	5.28	18.59	18.59	18.59	P_KWMTBOMO16357	P_KWMTBOMO16357	P_KWMTBOMO16357	4
156	5.22	5.22	23	23	15.02	P_KWMTBOMO05566	P_KWMTBOMO05566	P_KWMTBOMO05566	3
157	5.12	5.23	30.52	24.41	24.41	P_KWMTBOMO16481	P_KWMTBOMO16481	P_KWMTBOMO16481	6
158	5.11	5.12	31.69	18.11	10.7	P_KWMTBOMO04168	P_KWMTBOMO04168	P_KWMTBOMO04168	2
159	5.11	5.11	23.53	22.69	17.65	P_KWMTBOMO12706	P_KWMTBOMO12706	P_KWMTBOMO12706	3
160	5.06	5.06	37.5	21.15	14.42	P_KWMTBOMO06974	P_KWMTBOMO06974	P_KWMTBOMO06974	3
161	5.04	5.04	13.33	13.33	13.33	P_KWMTBOMO08655	P_KWMTBOMO08655	P_KWMTBOMO08655	5
162	5.02	5.02	14.77	6.977	6.977	P_KWMTBOMO01423	P_KWMTBOMO01423	P_KWMTBOMO01423	3
163	4.99	4.99	66.96	66.96	43.75	P_KWMTBOMO09230	P_KWMTBOMO09230	P_KWMTBOMO09230	2
164	4.99	4.99	10.13	7.839	7.839	P_KWMTBOMO08041	P_KWMTBOMO08041	P_KWMTBOMO08041	3
165	4.95	4.95	31.37	26.47	15.2	P_KWMTBOMO02734	P_KWMTBOMO02734	P_KWMTBOMO02734	2
166	4.84	4.85	12.63	9.091	9.091	P_KWMTBOMO15518	P_KWMTBOMO15518	P_KWMTBOMO15518	3
167	4.84	4.84	8.222	8.222	8.222	P_KWMTBOMO10283	P_KWMTBOMO10283	P_KWMTBOMO10283	3
168	4.81	4.81	7.078	7.078	7.078	P_KWMTBOMO14936	P_KWMTBOMO14936	P_KWMTBOMO14936	3
169	4.73	4.73	42.42	39.39	26.26	P_KWMTBOMO02431	P_KWMTBOMO02431	P_KWMTBOMO02431	3
170	4.72	4.72	12.22	6.111	4.074	P_KWMTBOMO12659	P_KWMTBOMO12659	P_KWMTBOMO12659	2
171	4.69	4.69	7.433	7.433	5.61	P_KWMTBOMO11336	P_KWMTBOMO11336	P_KWMTBOMO11336	3
174	4.58	4.58	13.95	4.834	3.729	P_KWMTBOMO15359	P_KWMTBOMO15359	P_KWMTBOMO15359	2
175	4.5	4.5	8.252	6.713	5.594	P_KWMTBOMO15060	P_KWMTBOMO15060	P_KWMTBOMO15060	3
176	4.45	4.45	9.611	9.611	8.009	P_KWMTBOMO14530	P_KWMTBOMO14530	P_KWMTBOMO14530	3
177	4.45	4.45	22.88	22.88	16.34	P_KWMTBOMO11021	P_KWMTBOMO11021	P_KWMTBOMO11021	3
178	4.43	4.45	13.46	13.46	10.38	P_KWMTBOMO13405	P_KWMTBOMO13405	P_KWMTBOMO13405	3
179	4.39	4.39	38.81	18.66	18.66	P_KWMTBOMO14639	P_KWMTBOMO14639	P_KWMTBOMO14639	3
180	4.34	4.34	18.69	18.69	12.15	P_KWMTBOMO10128	P_KWMTBOMO10128	P_KWMTBOMO10128	2
181	4.29	4.29	21.08	16.67	9.804	P_KWMTBOMO01273	P_KWMTBOMO01273	P_KWMTBOMO01273	2
182	4.23	4.23	27.7	19.59	16.22	P_KWMTBOMO08064	P_KWMTBOMO08064	P_KWMTBOMO08064	3
183	4.19	4.19	17.33	12.94	6.889	P_KWMTBOMO08956	P_KWMTBOMO08956	P_KWMTBOMO08956	2
184	4.17	4.17	13.46	9.615	5.769	P_KWMTBOMO13729	P_KWMTBOMO13729	P_KWMTBOMO13729	2
185	4.16	4.16	6.117	4.787	4.122	P_KWMTBOMO06291	P_KWMTBOMO06291	P_KWMTBOMO06291	2
186	4.16	4.16	5.146	5.146	3.774	P_KWMTBOMO03301	P_KWMTBOMO03301	P_KWMTBOMO03301	2
187	4.15	4.16	4.502	4.502	4.502	P_KWMTBOMO03177	P_KWMTBOMO03177	P_KWMTBOMO03177	3
188	4.13	4.13	26.36	26.36	20.93	P_KWMTBOMO05723	P_KWMTBOMO05723	P_KWMTBOMO05723	4
189	4.08	4.08	4.438	1.241	1.241	P_KWMTBOMO06045	P_KWMTBOMO06045	P_KWMTBOMO06045	2
190	4.08	4.08	12.41	12.41	8.511	P_KWMTBOMO00362	P_KWMTBOMO00362	P_KWMTBOMO00362	2
192	4	5.84	10.37	5.556	3.457	P_KWMTBOMO12844	P_KWMTBOMO12844	P_KWMTBOMO12844	3
193	4	4	9.957	6.926	6.926	P_KWMTBOMO15547	P_KWMTBOMO15547	P_KWMTBOMO15547	2
194	4	4	10.98	10.98	10.98	P_KWMTBOMO10916	P_KWMTBOMO10916	P_KWMTBOMO10916	2
195	4	4	2.183	1.523	1.523	P_KWMTBOMO10056	P_KWMTBOMO10056	P_KWMTBOMO10056	2
196	4	4	8.496	6.372	6.372	P_KWMTBOMO08578	P_KWMTBOMO08578	P_KWMTBOMO08578	2
197	4	4	6.403	4.223	4.223	P_KWMTBOMO03430	P_KWMTBOMO03430	P_KWMTBOMO03430	2
198	4	4	5.421	4.383	4.383	P_KWMTBOMO02535	P_KWMTBOMO02535	P_KWMTBOMO02535	2
199	4	4	35.62	35.62	35.62	P_KWMTBOMO08098	P_KWMTBOMO08098	P_KWMTBOMO08098	2
200	4	4	16.85	16.85	16.85	P_KWMTBOMO00860	P_KWMTBOMO00860	P_KWMTBOMO00860	2
201	3.9	3.9	12.59	6.897	3.966	P_KWMTBOMO02088	P_KWMTBOMO02088	P_KWMTBOMO02088	2
202	3.87	3.87	8.978	8.978	8.978	P_KWMTBOMO03986	P_KWMTBOMO03986	P_KWMTBOMO03986	3
203	3.82	3.82	24.73	24.73	24.73	P_KWMTBOMO06427	P_KWMTBOMO06427	P_KWMTBOMO06427	4
204	3.77	3.77	5.327	2.542	1.711	P_KWMTBOMO12878	P_KWMTBOMO12878	P_KWMTBOMO12878	3
205	3.76	3.76	8.475	3.789	2.592	P_KWMTBOMO04051	P_KWMTBOMO04051	P_KWMTBOMO04051	2
206	3.72	3.72	3.268	3.268	3.268	P_KWMTBOMO10779	P_KWMTBOMO10779	P_KWMTBOMO10779	2
207	3.7	3.7	5.618	5.618	5.618	P_KWMTBOMO02840	P_KWMTBOMO02840	P_KWMTBOMO02840	2
208	3.69	3.69	9.275	3.333	3.333	P_KWMTBOMO14549	P_KWMTBOMO14549	P_KWMTBOMO14549	2
209	3.67	3.67	44.3	30.87	30.87	P_KWMTBOMO13520	P_KWMTBOMO13520	P_KWMTBOMO13520	3
210	3.66	3.67	3.165	3.165	2.215	P_KWMTBOMO08343	P_KWMTBOMO08343	P_KWMTBOMO08343	2
211	3.62	3.62	20.33	20.33	11.54	P_KWMTBOMO04529	P_KWMTBOMO04529	P_KWMTBOMO04529	2
212	3.59	3.59	8.713	8.713	6.139	P_KWMTBOMO00982	P_KWMTBOMO00982	P_KWMTBOMO00982	2
213	3.54	3.54	34.62	34.62	34.62	P_KWMTBOMO12193	P_KWMTBOMO12193	P_KWMTBOMO12193	2
214	3.51	3.51	7.287	3.26	2.205	P_KWMTBOMO04806	P_KWMTBOMO04806	P_KWMTBOMO04806	2
215	3.47	3.47	6.234	6.234	6.234	P_KWMTBOMO14041	P_KWMTBOMO14041	P_KWMTBOMO14041	2
216	3.45	3.45	21.43	12.5	12.5	P_KWMTBOMO04740	P_KWMTBOMO04740	P_KWMTBOMO04740	2
217	3.44	3.44	6.88	6.88	6.88	P_KWMTBOMO02835	P_KWMTBOMO02835	P_KWMTBOMO02835	2
218	3.42	3.42	2.74	2.283	2.283	P_KWMTBOMO04906	P_KWMTBOMO04906	P_KWMTBOMO04906	2
219	3.41	3.41	4.158	4.158	4.158	P_KWMTBOMO07374	P_KWMTBOMO07374	P_KWMTBOMO07374	2
220	3.38	3.38	17.44	12.31	12.31	P_KWMTBOMO09355	P_KWMTBOMO09355	P_KWMTBOMO09355	2
221	3.36	3.36	9.47	9.47	9.47	P_KWMTBOMO05651	P_KWMTBOMO05651	P_KWMTBOMO05651	2
222	3.28	3.28	9.287	3.624	2.605	P_KWMTBOMO08045	P_KWMTBOMO08045	P_KWMTBOMO08045	2
223	3.12	3.12	18.18	18.18	18.18	P_KWMTBOMO01055	P_KWMTBOMO01055	P_KWMTBOMO01055	3
224	3.09	3.09	8.931	6.442	3.807	P_KWMTBOMO01452	P_KWMTBOMO01452	P_KWMTBOMO01452	2
225	3.05	3.05	7.331	5.263	5.263	P_KWMTBOMO03722	P_KWMTBOMO03722	P_KWMTBOMO03722	2
226	3.02	3.02	6.815	4.596	4.596	P_KWMTBOMO12094	P_KWMTBOMO12094	P_KWMTBOMO12094	2
227	3.02	3.02	39.29	39.29	17.86	P_KWMTBOMO03951	P_KWMTBOMO03951	P_KWMTBOMO03951	1
228	3.01	3.01	12.32	8.64	5.147	P_KWMTBOMO10337	P_KWMTBOMO10337	P_KWMTBOMO10337	2
229	2.99	2.99	18.01	12.32	12.32	P_KWMTBOMO15757	P_KWMTBOMO15757	P_KWMTBOMO15757	2
230	2.97	2.97	9.697	9.697	9.697	P_KWMTBOMO02914	P_KWMTBOMO02914	P_KWMTBOMO02914	2
231	2.96	2.96	11.16	7.363	5.463	P_KWMTBOMO04330	P_KWMTBOMO04330	P_KWMTBOMO04330	2
232	2.95	2.95	28.46	21.95	10.57	P_KWMTBOMO01941	P_KWMTBOMO01941	P_KWMTBOMO01941	1
233	2.94	2.94	6.936	2.119	2.119	P_KWMTBOMO04768	P_KWMTBOMO04768	P_KWMTBOMO04768	2
235	2.88	2.88	6.735	5.479	1.484	P_KWMTBOMO09621	P_KWMTBOMO09621	P_KWMTBOMO09621	1
236	2.86	2.86	8.378	4.388	4.388	P_KWMTBOMO14942	P_KWMTBOMO14942	P_KWMTBOMO14942	2
237	2.83	2.83	6.484	4.115	4.115	P_KWMTBOMO01072	P_KWMTBOMO01072	P_KWMTBOMO01072	2
238	2.81	2.81	8.425	8.425	8.425	P_KWMTBOMO04789	P_KWMTBOMO04789	P_KWMTBOMO04789	2
239	2.76	2.76	8.133	5.36	5.36	P_KWMTBOMO06999	P_KWMTBOMO06999	P_KWMTBOMO06999	2
240	2.75	5.05	16.27	16.27	16.27	P_KWMTBOMO03027	P_KWMTBOMO03027	P_KWMTBOMO03027	3
241	2.74	2.74	5.014	5.014	2.786	P_KWMTBOMO10358	P_KWMTBOMO10358	P_KWMTBOMO10358	1
242	2.71	2.71	12.29	9.777	3.352	P_KWMTBOMO14715	P_KWMTBOMO14715	P_KWMTBOMO14715	2
243	2.69	2.69	8.092	4.895	3.996	P_KWMTBOMO00722	P_KWMTBOMO00722	P_KWMTBOMO00722	1
244	2.68	2.68	8.155	6.438	4.506	P_KWMTBOMO02500	P_KWMTBOMO02500	P_KWMTBOMO02500	2
245	2.66	2.66	16.35	14.1	9.295	P_KWMTBOMO15665	P_KWMTBOMO15665	P_KWMTBOMO15665	2
246	2.64	2.64	17.16	17.16	14.22	P_KWMTBOMO09631	P_KWMTBOMO09631	P_KWMTBOMO09631	2
247	2.63	2.63	18.8	9.6	4.8	P_KWMTBOMO11583	P_KWMTBOMO11583	P_KWMTBOMO11583	1
248	2.61	2.61	9.452	7.561	3.403	P_KWMTBOMO01606	P_KWMTBOMO01606	P_KWMTBOMO01606	1
249	2.59	2.59	11.06	6.546	2.935	P_KWMTBOMO14804	P_KWMTBOMO14804	P_KWMTBOMO14804	1
250	2.58	2.58	8.696	8.696	5.351	P_KWMTBOMO11061	P_KWMTBOMO11061	P_KWMTBOMO11061	1
251	2.53	2.53	5.848	3.509	3.509	P_KWMTBOMO04170	P_KWMTBOMO04170	P_KWMTBOMO04170	2
252	2.5	2.5	5.184	5.184	5.184	P_KWMTBOMO12208	P_KWMTBOMO12208	P_KWMTBOMO12208	2
253	2.48	2.48	13.4	5.412	3.608	P_KWMTBOMO14160	P_KWMTBOMO14160	P_KWMTBOMO14160	1
254	2.48	2.48	34.74	34.74	14.74	P_KWMTBOMO14478	P_KWMTBOMO14478	P_KWMTBOMO14478	1
255	2.46	2.46	2.614	1.542	0.6702	P_KWMTBOMO07214	P_KWMTBOMO07214	P_KWMTBOMO07214	1
256	2.45	2.45	5.865	2.933	2.933	P_KWMTBOMO05321	P_KWMTBOMO05321	P_KWMTBOMO05321	2
257	2.4	2.4	11.89	8.649	4.324	P_KWMTBOMO15584	P_KWMTBOMO15584	P_KWMTBOMO15584	1
258	2.4	2.4	8.602	6.237	3.441	P_KWMTBOMO05564	P_KWMTBOMO05564	P_KWMTBOMO05564	1
259	2.4	2.4	13.14	13.14	8.571	P_KWMTBOMO16319	P_KWMTBOMO16319	P_KWMTBOMO16319	1
260	2.36	2.36	16.45	6.941	3.085	P_KWMTBOMO05464	P_KWMTBOMO05464	P_KWMTBOMO05464	1
261	2.31	2.31	8.845	5.235	3.249	P_KWMTBOMO09838	P_KWMTBOMO09838	P_KWMTBOMO09838	1
262	2.29	2.29	31.54	24.62	24.62	P_KWMTBOMO07368	P_KWMTBOMO07368	P_KWMTBOMO07368	2
263	2.25	2.25	12.92	12.92	8.427	P_KWMTBOMO05078	P_KWMTBOMO05078	P_KWMTBOMO05078	1
264	2.24	2.24	12.78	4.045	2.589	P_KWMTBOMO03630	P_KWMTBOMO03630	P_KWMTBOMO03630	1
265	2.24	2.24	4.255	4.255	2.553	P_KWMTBOMO15125	P_KWMTBOMO15125	P_KWMTBOMO15125	1
266	2.23	2.23	32.43	12.84	6.757	P_KWMTBOMO07930	P_KWMTBOMO07930	P_KWMTBOMO07930	1
267	2.22	2.22	25.71	25.71	11.43	P_KWMTBOMO10049	P_KWMTBOMO10049	P_KWMTBOMO10049	1
268	2.18	2.18	4.517	0.7652	0.3456	P_KWMTBOMO12602	P_KWMTBOMO12602	P_KWMTBOMO12602	1
271	2.13	2.13	26.62	17.27	6.475	P_KWMTBOMO11987	P_KWMTBOMO11987	P_KWMTBOMO11987	1
272	2.11	2.11	4.762	4.762	2.692	P_KWMTBOMO00473	P_KWMTBOMO00473	P_KWMTBOMO00473	1
273	2.1	2.1	18.36	8.213	4.831	P_KWMTBOMO08106	P_KWMTBOMO08106	P_KWMTBOMO08106	1
274	2.1	2.1	19.69	8.268	4.331	P_KWMTBOMO04594	P_KWMTBOMO04594	P_KWMTBOMO04594	1
275	2.1	2.1	6.716	2.564	1.099	P_KWMTBOMO00303	P_KWMTBOMO00303	P_KWMTBOMO00303	1
276	2.08	2.08	12.56	8.718	5.897	P_KWMTBOMO16309	P_KWMTBOMO16309	P_KWMTBOMO16309	1
277	2.07	2.07	4.136	2.676	2.676	P_KWMTBOMO00390	P_KWMTBOMO00390	P_KWMTBOMO00390	1
278	2.06	2.06	8.667	6	6	P_KWMTBOMO02775	P_KWMTBOMO02775	P_KWMTBOMO02775	1
279	2.04	2.04	20.1	12.06	6.03	P_KWMTBOMO00200	P_KWMTBOMO00200	P_KWMTBOMO00200	1
280	2.03	2.03	6.343	6.343	3.731	P_KWMTBOMO11161	P_KWMTBOMO11161	P_KWMTBOMO11161	1
281	2.03	2.03	18.46	9.231	9.231	P_KWMTBOMO06373	P_KWMTBOMO06373	P_KWMTBOMO06373	1
282	2.03	2.03	11.6	11.6	8	P_KWMTBOMO04427	P_KWMTBOMO04427	P_KWMTBOMO04427	1
283	2.03	2.03	5.388	2.802	2.802	P_KWMTBOMO00373	P_KWMTBOMO00373	P_KWMTBOMO00373	1
284	2.02	2.02	9.496	6.202	3.295	P_KWMTBOMO06354	P_KWMTBOMO06354	P_KWMTBOMO06354	1
285	2.02	2.02	18.92	18.92	12.16	P_KWMTBOMO14440	P_KWMTBOMO14440	P_KWMTBOMO14440	1
286	2.02	2.02	3.793	2.069	2.069	P_KWMTBOMO11590	P_KWMTBOMO11590	P_KWMTBOMO11590	1
287	2.02	2.02	6.061	4.408	4.408	P_KWMTBOMO01802	P_KWMTBOMO01802	P_KWMTBOMO01802	1
289	2.01	2.01	5.556	1.778	1.778	P_KWMTBOMO06822	P_KWMTBOMO06822	P_KWMTBOMO06822	1
290	2.01	2.01	8.184	2.794	2.794	P_KWMTBOMO15121	P_KWMTBOMO15121	P_KWMTBOMO15121	1
291	2.01	2.01	6.431	4.18	4.18	P_KWMTBOMO01312	P_KWMTBOMO01312	P_KWMTBOMO01312	1
292	2	4	5.492	5.492	5.492	P_KWMTBOMO15123	P_KWMTBOMO15123	P_KWMTBOMO15123	2
293	2	4	10.28	10.28	10.28	P_KWMTBOMO13774	P_KWMTBOMO13774	P_KWMTBOMO13774	2
294	2	2.01	4.473	2.875	2.875	P_KWMTBOMO05299	P_KWMTBOMO05299	P_KWMTBOMO05299	1
295	2	2.01	10.49	7.407	7.407	P_KWMTBOMO03622	P_KWMTBOMO03622	P_KWMTBOMO03622	1
296	2	2	3.858	0.5735	0.5735	P_KWMTBOMO15243	P_KWMTBOMO15243	P_KWMTBOMO15243	1
297	2	2	3.75	1.607	1.607	P_KWMTBOMO10243	P_KWMTBOMO10243	P_KWMTBOMO10243	1
298	2	2	17.18	4.58	4.58	P_KWMTBOMO00837	P_KWMTBOMO00837	P_KWMTBOMO00837	1
299	2	2	15.32	7.207	7.207	P_KWMTBOMO16375	P_KWMTBOMO16375	P_KWMTBOMO16375	1
300	2	2	10.37	10.37	4.521	P_KWMTBOMO14845	P_KWMTBOMO14845	P_KWMTBOMO14845	1
301	2	2	40.23	22.99	22.99	P_KWMTBOMO13722	P_KWMTBOMO13722	P_KWMTBOMO13722	1
302	2	2	9.677	5.069	5.069	P_KWMTBOMO13597	P_KWMTBOMO13597	P_KWMTBOMO13597	1
303	2	2	24.24	11.36	11.36	P_KWMTBOMO10591	P_KWMTBOMO10591	P_KWMTBOMO10591	1
304	2	2	8.078	5.292	5.292	P_KWMTBOMO08607	P_KWMTBOMO08607	P_KWMTBOMO08607	1
305	2	2	6.863	2.696	2.696	P_KWMTBOMO07554	P_KWMTBOMO07554	P_KWMTBOMO07554	1
306	2	2	10.03	4.425	4.425	P_KWMTBOMO07278	P_KWMTBOMO07278	P_KWMTBOMO07278	1
307	2	2	11.59	5.072	5.072	P_KWMTBOMO05975	P_KWMTBOMO05975	P_KWMTBOMO05975	1
309	2	2	5.172	3.017	3.017	P_KWMTBOMO01708	P_KWMTBOMO01708	P_KWMTBOMO01708	1
310	2	2	1.844	0.922	0.922	P_KWMTBOMO01579	P_KWMTBOMO01579	P_KWMTBOMO01579	1
311	2	2	3.874	3.874	3.874	P_KWMTBOMO16261	P_KWMTBOMO16261	P_KWMTBOMO16261	1
312	2	2	3.077	3.077	3.077	P_KWMTBOMO15781	P_KWMTBOMO15781	P_KWMTBOMO15781	1
313	2	2	7.692	7.692	7.692	P_KWMTBOMO13859	P_KWMTBOMO13859	P_KWMTBOMO13859	1
314	2	2	5.263	5.263	5.263	P_KWMTBOMO13723	P_KWMTBOMO13723	P_KWMTBOMO13723	1
315	2	2	4.365	4.365	4.365	P_KWMTBOMO12448	P_KWMTBOMO12448	P_KWMTBOMO12448	1
316	2	2	16.92	16.92	16.92	P_KWMTBOMO12400	P_KWMTBOMO12400	P_KWMTBOMO12400	1
317	2	2	4.514	4.514	4.514	P_KWMTBOMO11202	P_KWMTBOMO11202	P_KWMTBOMO11202	1
318	2	2	2.376	2.376	2.376	P_KWMTBOMO11110	P_KWMTBOMO11110	P_KWMTBOMO11110	1
319	2	2	4.183	4.183	4.183	P_KWMTBOMO09709	P_KWMTBOMO09709	P_KWMTBOMO09709	1
320	2	2	1.964	1.964	1.964	P_KWMTBOMO08707	P_KWMTBOMO08707	P_KWMTBOMO08707	1
321	2	2	5.263	5.263	5.263	P_KWMTBOMO08323	P_KWMTBOMO08323	P_KWMTBOMO08323	1
322	2	2	2.709	2.709	2.709	P_KWMTBOMO08056	P_KWMTBOMO08056	P_KWMTBOMO08056	1
323	2	2	14.71	14.71	14.71	P_KWMTBOMO07600	P_KWMTBOMO07600	P_KWMTBOMO07600	1
324	2	2	2.876	2.876	2.876	P_KWMTBOMO05205	P_KWMTBOMO05205	P_KWMTBOMO05205	1
325	2	2	5.019	5.019	5.019	P_KWMTBOMO04992	P_KWMTBOMO04992	P_KWMTBOMO04992	1
326	2	2	2.994	2.994	2.994	P_KWMTBOMO04966	P_KWMTBOMO04966	P_KWMTBOMO04966	1
327	2	2	6.011	6.011	6.011	P_KWMTBOMO04584	P_KWMTBOMO04584	P_KWMTBOMO04584	1
328	2	2	2.936	2.936	2.936	P_KWMTBOMO03631	P_KWMTBOMO03631	P_KWMTBOMO03631	1
329	2	2	8.571	8.571	8.571	P_KWMTBOMO03003	P_KWMTBOMO03003	P_KWMTBOMO03003	1
330	2	2	13.89	13.89	13.89	P_KWMTBOMO02542	P_KWMTBOMO02542	P_KWMTBOMO02542	1
331	2	2	12.58	12.58	12.58	P_KWMTBOMO02450	P_KWMTBOMO02450	P_KWMTBOMO02450	1
332	2	2	4.872	4.872	4.872	P_KWMTBOMO02223	P_KWMTBOMO02223	P_KWMTBOMO02223	1
333	2	2	1.594	1.594	1.594	P_KWMTBOMO01817	P_KWMTBOMO01817	P_KWMTBOMO01817	1
334	2	2	7.273	7.273	7.273	P_KWMTBOMO01799	P_KWMTBOMO01799	P_KWMTBOMO01799	1
335	2	2	6.573	6.573	6.573	P_KWMTBOMO01662	P_KWMTBOMO01662	P_KWMTBOMO01662	1
336	2	2	4	4	4	P_KWMTBOMO01315	P_KWMTBOMO01315	P_KWMTBOMO01315	1
337	2	2	7.273	7.273	7.273	P_KWMTBOMO01129	P_KWMTBOMO01129	P_KWMTBOMO01129	1
338	2	2	5.213	5.213	5.213	P_KWMTBOMO00794	P_KWMTBOMO00794	P_KWMTBOMO00794	1
339	1.92	1.92	9.205	9.205	5.858	P_KWMTBOMO05784	P_KWMTBOMO05784	P_KWMTBOMO05784	1
340	1.92	1.92	9.317	9.317	9.317	P_KWMTBOMO07061	P_KWMTBOMO07061	P_KWMTBOMO07061	1
341	1.92	1.92	6.364	6.364	6.364	P_KWMTBOMO06639	P_KWMTBOMO06639	P_KWMTBOMO06639	1
342	1.92	1.92	3.836	3.836	3.836	P_KWMTBOMO05806	P_KWMTBOMO05806	P_KWMTBOMO05806	1
343	1.84	1.84	7.124	7.124	4.485	P_KWMTBOMO05258	P_KWMTBOMO05258	P_KWMTBOMO05258	1
344	1.82	1.82	4.805	4.805	4.805	P_KWMTBOMO09250	P_KWMTBOMO09250	P_KWMTBOMO09250	1
345	1.8	1.8	14.97	14.97	8.844	P_KWMTBOMO12483	P_KWMTBOMO12483	P_KWMTBOMO12483	2
346	1.8	1.8	6.116	3.14	3.14	P_KWMTBOMO04132	P_KWMTBOMO04132	P_KWMTBOMO04132	1
347	1.74	1.74	19.51	9.756	4.39	P_KWMTBOMO15407	P_KWMTBOMO15407	P_KWMTBOMO15407	1
348	1.72	1.72	2.002	1.144	1.144	P_KWMTBOMO12965	P_KWMTBOMO12965	P_KWMTBOMO12965	1
349	1.7	1.7	4.52	4.52	4.52	P_KWMTBOMO01380	P_KWMTBOMO01380	P_KWMTBOMO01380	1
350	1.66	1.66	15.5	6.687	3.647	P_KWMTBOMO08776	P_KWMTBOMO08776	P_KWMTBOMO08776	1
351	1.62	1.62	4.63	4.63	4.63	P_KWMTBOMO16600	P_KWMTBOMO16600	P_KWMTBOMO16600	1
352	1.6	1.6	2.132	1.066	1.066	P_KWMTBOMO12667	P_KWMTBOMO12667	P_KWMTBOMO12667	1
353	1.58	1.58	14.29	8.525	4.378	P_KWMTBOMO01114	P_KWMTBOMO01114	P_KWMTBOMO01114	2
354	1.55	1.55	2.239	2.239	2.239	P_KWMTBOMO11689	P_KWMTBOMO11689	P_KWMTBOMO11689	1
355	1.52	1.52	11.9	9.524	1.905	P_KWMTBOMO16204	P_KWMTBOMO16204	P_KWMTBOMO16204	1
356	1.52	1.52	10.09	10.09	10.09	P_KWMTBOMO06299	P_KWMTBOMO06299	P_KWMTBOMO06299	1
357	1.52	1.52	3.409	3.409	3.409	P_KWMTBOMO03431	P_KWMTBOMO03431	P_KWMTBOMO03431	1
358	1.46	1.46	3.509	3.509	3.509	P_KWMTBOMO03721	P_KWMTBOMO03721	P_KWMTBOMO03721	1
359	1.43	1.43	11.34	11.34	11.34	P_KWMTBOMO01918	P_KWMTBOMO01918	P_KWMTBOMO01918	1
360	1.42	5.77	16.75	16.75	16.75	P_KWMTBOMO06927	P_KWMTBOMO06927	P_KWMTBOMO06927	3
361	1.41	1.41	7.463	7.463	7.463	P_KWMTBOMO11416	P_KWMTBOMO11416	P_KWMTBOMO11416	2
362	1.41	1.41	4.557	2.532	2.532	P_KWMTBOMO08310	P_KWMTBOMO08310	P_KWMTBOMO08310	1
363	1.4	1.4	8.427	1.685	1.685	P_KWMTBOMO13226	P_KWMTBOMO13226	P_KWMTBOMO13226	1
364	1.36	1.36	3.933	3.933	3.933	P_KWMTBOMO15419	P_KWMTBOMO15419	P_KWMTBOMO15419	1
365	1.35	1.35	3.152	3.152	3.152	P_KWMTBOMO01076	P_KWMTBOMO01076	P_KWMTBOMO01076	1
366	1.34	1.34	2.941	0.8913	0.4902	P_KWMTBOMO05810	P_KWMTBOMO05810	P_KWMTBOMO05810	1
367	1.34	1.34	6.068	1.138	1.138	P_KWMTBOMO05612	P_KWMTBOMO05612	P_KWMTBOMO05612	1
368	1.33	1.33	6.25	6.25	6.25	P_KWMTBOMO00265	P_KWMTBOMO00265	P_KWMTBOMO00265	1
369	1.32	1.32	3.743	3.743	3.743	P_KWMTBOMO15712	P_KWMTBOMO15712	P_KWMTBOMO15712	1
370	1.31	1.31	7.28	2.874	2.874	P_KWMTBOMO15179	P_KWMTBOMO15179	P_KWMTBOMO15179	1
371	1.31	1.31	9.926	6.618	6.618	P_KWMTBOMO09672	P_KWMTBOMO09672	P_KWMTBOMO09672	1
372	1.3	1.31	13.11	13.11	13.11	P_KWMTBOMO12189	P_KWMTBOMO12189	P_KWMTBOMO12189	1
373	1.3	1.3	6.564	6.564	6.564	P_KWMTBOMO00339	P_KWMTBOMO00339	P_KWMTBOMO00339	1

## Sheet: fibL_M4
N	Unused	Total	%Cov	%Cov(50)	%Cov(95)	Accession	Citable Accession	Name	Peptides(95%)
3	34.52	34.52	14.3	11.37	10.12	P_KWMTBOMO08648	P_KWMTBOMO08648	P_KWMTBOMO08648	18
10	21.55	21.55	22.99	19.08	15.4	P_KWMTBOMO11731	P_KWMTBOMO11731	P_KWMTBOMO11731	12
12	19.05	19.05	19.14	13.51	13.51	P_KWMTBOMO00462	P_KWMTBOMO00462	P_KWMTBOMO00462	11
14	18.14	26.2	24.12	22.6	22.44	P_KWMTBOMO08642	P_KWMTBOMO08642	P_KWMTBOMO08642	16
17	15.96	15.96	46.14	34.26	19.41	P_KWMTBOMO07374	P_KWMTBOMO07374	P_KWMTBOMO07374	9
18	15.69	15.69	8.774	7.107	7.107	P_KWMTBOMO14858	P_KWMTBOMO14858	P_KWMTBOMO14858	8
19	15.34	15.34	28.44	23.35	19.77	P_KWMTBOMO09808	P_KWMTBOMO09808	P_KWMTBOMO09808	8
21	15.09	15.09	22.99	20.58	19.13	P_KWMTBOMO03748	P_KWMTBOMO03748	P_KWMTBOMO03748	8
22	15.03	15.03	31.6	29.37	19.7	P_KWMTBOMO11985	P_KWMTBOMO11985	P_KWMTBOMO11985	9
24	14.5	14.5	25.27	25.27	20.51	P_KWMTBOMO09442	P_KWMTBOMO09442	P_KWMTBOMO09442	8
25	13.86	13.86	10.96	9.617	7.446	P_KWMTBOMO01927	P_KWMTBOMO01927	P_KWMTBOMO01927	7
27	13.03	13.03	8.985	5.736	4.315	P_KWMTBOMO10056	P_KWMTBOMO10056	P_KWMTBOMO10056	7
28	12.75	12.75	12.49	10.3	8.324	P_KWMTBOMO15159	P_KWMTBOMO15159	P_KWMTBOMO15159	6
29	12.57	12.57	31.05	19.74	19.74	P_KWMTBOMO01720	P_KWMTBOMO01720	P_KWMTBOMO01720	7
30	12.48	12.48	40.06	31.82	24.43	P_KWMTBOMO05675	P_KWMTBOMO05675	P_KWMTBOMO05675	8
31	12.36	12.36	8.05	5.424	2.884	P_KWMTBOMO11045	P_KWMTBOMO11045	P_KWMTBOMO11045	5
33	12.11	12.11	22.58	16.72	15.72	P_KWMTBOMO04502	P_KWMTBOMO04502	P_KWMTBOMO04502	8
34	11.99	11.99	20.42	14.75	10.7	P_KWMTBOMO11096	P_KWMTBOMO11096	P_KWMTBOMO11096	6
36	11.28	11.28	10.7	7.914	7.914	P_KWMTBOMO14420	P_KWMTBOMO14420	P_KWMTBOMO14420	6
37	11.22	11.22	33.64	17.28	13.36	P_KWMTBOMO06229	P_KWMTBOMO06229	P_KWMTBOMO06229	5
38	10.84	10.84	29.16	24.62	20.09	P_KWMTBOMO03005	P_KWMTBOMO03005	P_KWMTBOMO03005	7
40	10.64	10.64	41.24	35.04	28.47	P_KWMTBOMO01796	P_KWMTBOMO01796	P_KWMTBOMO01796	6
41	10.37	10.37	33.84	29.28	17.11	P_KWMTBOMO13455	P_KWMTBOMO13455	P_KWMTBOMO13455	4
42	10.27	10.27	15.2	10.6	7.8	P_KWMTBOMO13293	P_KWMTBOMO13293	P_KWMTBOMO13293	6
44	9.99	9.99	18.18	16.51	15.03	P_KWMTBOMO01075	P_KWMTBOMO01075	P_KWMTBOMO01075	5
46	9.55	9.55	16.67	11.16	7.203	P_KWMTBOMO09050	P_KWMTBOMO09050	P_KWMTBOMO09050	4
48	9.4	9.4	10.7	3.612	1.625	P_KWMTBOMO06632	P_KWMTBOMO06632	P_KWMTBOMO06632	3
49	9.31	9.31	39.34	33.33	29.51	P_KWMTBOMO06480	P_KWMTBOMO06480	P_KWMTBOMO06480	6
51	9.14	9.14	18.35	18.35	18.35	P_KWMTBOMO00497	P_KWMTBOMO00497	P_KWMTBOMO00497	5
52	9.06	9.06	34.02	29.9	20.62	P_KWMTBOMO11255	P_KWMTBOMO11255	P_KWMTBOMO11255	4
54	8.76	8.76	32.95	24.14	21.84	P_KWMTBOMO07688	P_KWMTBOMO07688	P_KWMTBOMO07688	5
55	8.73	8.73	11.88	7.285	5.589	P_KWMTBOMO05541	P_KWMTBOMO05541	P_KWMTBOMO05541	4
56	8.68	8.68	17.31	14.32	12.18	P_KWMTBOMO02470	P_KWMTBOMO02470	P_KWMTBOMO02470	4
57	8.38	8.38	9.666	6.501	3.678	P_KWMTBOMO04505	P_KWMTBOMO04505	P_KWMTBOMO04505	4
58	8.18	8.18	15.19	10.6	7.595	P_KWMTBOMO08044	P_KWMTBOMO08044	P_KWMTBOMO08044	4
59	8	8	35.77	35.77	35.77	P_KWMTBOMO12287	P_KWMTBOMO12287	P_KWMTBOMO12287	4
60	8	8	24.49	24.49	24.49	P_KWMTBOMO10509	P_KWMTBOMO10509	P_KWMTBOMO10509	6
62	7.88	7.88	9.257	6.09	6.09	P_KWMTBOMO00638	P_KWMTBOMO00638	P_KWMTBOMO00638	4
63	7.86	7.86	9.685	6.941	3.067	P_KWMTBOMO05687	P_KWMTBOMO05687	P_KWMTBOMO05687	4
64	7.79	7.79	14.63	9.944	8.068	P_KWMTBOMO06770	P_KWMTBOMO06770	P_KWMTBOMO06770	4
65	7.78	7.89	8.488	7.907	6.395	P_KWMTBOMO15583	P_KWMTBOMO15583	P_KWMTBOMO15583	5
66	7.72	7.72	22.18	19.46	19.46	P_KWMTBOMO08983	P_KWMTBOMO08983	P_KWMTBOMO08983	7
67	7.69	7.69	21.04	16.16	16.16	P_KWMTBOMO06082	P_KWMTBOMO06082	P_KWMTBOMO06082	4
68	7.56	7.56	16.76	11.89	10.09	P_KWMTBOMO03626	P_KWMTBOMO03626	P_KWMTBOMO03626	4
69	7.52	7.52	18.67	18.67	15.82	P_KWMTBOMO09300	P_KWMTBOMO09300	P_KWMTBOMO09300	4
70	7.47	7.47	14.41	13.15	8.142	P_KWMTBOMO08956	P_KWMTBOMO08956	P_KWMTBOMO08956	3
71	7.44	7.44	17.86	13.1	13.1	P_KWMTBOMO02081	P_KWMTBOMO02081	P_KWMTBOMO02081	5
72	7.4	7.4	11.29	11.29	7.286	P_KWMTBOMO00927	P_KWMTBOMO00927	P_KWMTBOMO00927	3
74	7.24	7.24	14.39	14.39	14.39	P_KWMTBOMO11192	P_KWMTBOMO11192	P_KWMTBOMO11192	5
75	7.17	7.17	35.1	29.8	29.8	P_KWMTBOMO08440	P_KWMTBOMO08440	P_KWMTBOMO08440	4
76	7.1	7.1	11.93	10.28	10.28	P_KWMTBOMO13721	P_KWMTBOMO13721	P_KWMTBOMO13721	5
77	7.04	7.04	13.99	10.45	10.45	P_KWMTBOMO07855	P_KWMTBOMO07855	P_KWMTBOMO07855	4
78	7.02	7.02	11.81	11.81	7.011	P_KWMTBOMO00793	P_KWMTBOMO00793	P_KWMTBOMO00793	4
80	6.75	6.75	37.85	25.99	20.9	P_KWMTBOMO13800	P_KWMTBOMO13800	P_KWMTBOMO13800	3
81	6.73	6.73	16.9	11.97	11.97	P_KWMTBOMO00437	P_KWMTBOMO00437	P_KWMTBOMO00437	4
83	6.46	6.46	22.69	19.62	19.62	P_KWMTBOMO13405	P_KWMTBOMO13405	P_KWMTBOMO13405	4
84	6.39	6.39	21.67	16.33	10.33	P_KWMTBOMO14732	P_KWMTBOMO14732	P_KWMTBOMO14732	4
85	6.11	6.11	17.06	17.06	10.37	P_KWMTBOMO11061	P_KWMTBOMO11061	P_KWMTBOMO11061	4
86	6.06	6.06	10.55	9.04	9.04	P_KWMTBOMO00366	P_KWMTBOMO00366	P_KWMTBOMO00366	3
87	6.05	6.05	14.82	11.29	7.529	P_KWMTBOMO09415	P_KWMTBOMO09415	P_KWMTBOMO09415	5
88	6.03	6.03	30.38	16.46	16.46	P_KWMTBOMO14479	P_KWMTBOMO14479	P_KWMTBOMO14479	3
89	6.01	6.01	10.68	3.942	3.942	P_KWMTBOMO05741	P_KWMTBOMO05741	P_KWMTBOMO05741	3
90	6	6	19.35	9.274	9.274	P_KWMTBOMO12037	P_KWMTBOMO12037	P_KWMTBOMO12037	3
91	6	6	21.55	21.55	21.55	P_KWMTBOMO16637	P_KWMTBOMO16637	P_KWMTBOMO16637	3
92	6	6	22.07	22.07	22.07	P_KWMTBOMO01424	P_KWMTBOMO01424	P_KWMTBOMO01424	4
93	5.83	5.83	12.9	10.97	9.032	P_KWMTBOMO05564	P_KWMTBOMO05564	P_KWMTBOMO05564	3
94	5.8	5.8	4.736	2.684	2.684	P_KWMTBOMO03067	P_KWMTBOMO03067	P_KWMTBOMO03067	3
95	5.73	5.73	21.68	21.68	16.08	P_KWMTBOMO08666	P_KWMTBOMO08666	P_KWMTBOMO08666	3
96	5.72	5.72	5.475	4.339	4.339	P_KWMTBOMO07589	P_KWMTBOMO07589	P_KWMTBOMO07589	3
97	5.64	5.64	5.226	4.724	3.92	P_KWMTBOMO10780	P_KWMTBOMO10780	P_KWMTBOMO10780	3
98	5.59	5.59	47.8	16.98	16.98	P_KWMTBOMO08100	P_KWMTBOMO08100	P_KWMTBOMO08100	4
99	5.55	5.55	16.34	16.34	13.07	P_KWMTBOMO10248	P_KWMTBOMO10248	P_KWMTBOMO10248	4
100	5.54	5.54	11.89	10.84	10.84	P_KWMTBOMO03860	P_KWMTBOMO03860	P_KWMTBOMO03860	3
101	5.52	5.52	28.95	14.74	14.74	P_KWMTBOMO12018	P_KWMTBOMO12018	P_KWMTBOMO12018	3
102	5.44	5.44	18.57	18.57	18.57	P_KWMTBOMO00838	P_KWMTBOMO00838	P_KWMTBOMO00838	5
103	5.23	5.23	24.66	20.55	9.589	P_KWMTBOMO05979	P_KWMTBOMO05979	P_KWMTBOMO05979	2
104	5.23	5.23	18.59	18.59	18.59	P_KWMTBOMO16357	P_KWMTBOMO16357	P_KWMTBOMO16357	4
105	5.11	5.11	12.85	8.411	8.411	P_KWMTBOMO14984	P_KWMTBOMO14984	P_KWMTBOMO14984	3
106	5.02	5.02	6.618	5.147	3.529	P_KWMTBOMO08652	P_KWMTBOMO08652	P_KWMTBOMO08652	4
107	5.02	5.02	19.63	19.63	19.63	P_KWMTBOMO11448	P_KWMTBOMO11448	P_KWMTBOMO11448	3
108	5	5	16.41	16.41	16.41	P_KWMTBOMO01320	P_KWMTBOMO01320	P_KWMTBOMO01320	3
110	4.96	4.96	3.851	3.851	3.851	P_KWMTBOMO01817	P_KWMTBOMO01817	P_KWMTBOMO01817	3
111	4.9	4.9	38.24	31.37	29.41	P_KWMTBOMO13569	P_KWMTBOMO13569	P_KWMTBOMO13569	5
112	4.77	4.77	4.834	4.834	3.729	P_KWMTBOMO15359	P_KWMTBOMO15359	P_KWMTBOMO15359	2
114	4.68	5.71	10.25	6.79	2.716	P_KWMTBOMO12844	P_KWMTBOMO12844	P_KWMTBOMO12844	2
115	4.68	4.68	11.78	8.222	6.222	P_KWMTBOMO10283	P_KWMTBOMO10283	P_KWMTBOMO10283	2
116	4.66	4.66	9.871	6.311	6.311	P_KWMTBOMO03630	P_KWMTBOMO03630	P_KWMTBOMO03630	3
117	4.6	4.6	4.994	3.02	3.02	P_KWMTBOMO00427	P_KWMTBOMO00427	P_KWMTBOMO00427	3
118	4.59	4.59	7.103	5.71	4.735	P_KWMTBOMO10358	P_KWMTBOMO10358	P_KWMTBOMO10358	2
119	4.55	4.55	17.83	10.6	6.988	P_KWMTBOMO13979	P_KWMTBOMO13979	P_KWMTBOMO13979	2
120	4.42	4.42	5.575	1.832	1.287	P_KWMTBOMO12304	P_KWMTBOMO12304	P_KWMTBOMO12304	2
121	4.36	4.36	19.87	19.87	19.87	P_KWMTBOMO16040	P_KWMTBOMO16040	P_KWMTBOMO16040	3
122	4.34	4.34	9.452	6.805	4.915	P_KWMTBOMO01606	P_KWMTBOMO01606	P_KWMTBOMO01606	2
123	4.33	4.33	11.31	9.296	5.779	P_KWMTBOMO12166	P_KWMTBOMO12166	P_KWMTBOMO12166	2
124	4.3	4.3	13.25	13.25	9.603	P_KWMTBOMO12389	P_KWMTBOMO12389	P_KWMTBOMO12389	2
125	4.21	4.21	28.48	22.52	14.57	P_KWMTBOMO13960	P_KWMTBOMO13960	P_KWMTBOMO13960	2
126	4.18	4.18	13.72	7.674	6.279	P_KWMTBOMO02061	P_KWMTBOMO02061	P_KWMTBOMO02061	2
127	4.17	4.17	5.502	2.992	2.992	P_KWMTBOMO11517	P_KWMTBOMO11517	P_KWMTBOMO11517	2
128	4.17	4.17	10.09	10.09	8.012	P_KWMTBOMO10376	P_KWMTBOMO10376	P_KWMTBOMO10376	3
129	4.16	4.16	14.54	5.229	5.229	P_KWMTBOMO15928	P_KWMTBOMO15928	P_KWMTBOMO15928	2
130	4.15	4.15	32.93	23.17	23.17	P_KWMTBOMO11678	P_KWMTBOMO11678	P_KWMTBOMO11678	3
131	4.13	4.13	15.49	9.155	9.155	P_KWMTBOMO07373	P_KWMTBOMO07373	P_KWMTBOMO07373	3
132	4.09	5.11	23.66	19.08	8.779	P_KWMTBOMO09980	P_KWMTBOMO09980	P_KWMTBOMO09980	3
133	4.08	4.08	17.91	10.14	10.14	P_KWMTBOMO16197	P_KWMTBOMO16197	P_KWMTBOMO16197	2
134	4.08	4.08	22.28	10.89	10.89	P_KWMTBOMO15361	P_KWMTBOMO15361	P_KWMTBOMO15361	2
135	4.08	4.08	10.56	7.918	7.918	P_KWMTBOMO13997	P_KWMTBOMO13997	P_KWMTBOMO13997	2
136	4.07	4.07	14.42	4.389	4.389	P_KWMTBOMO01148	P_KWMTBOMO01148	P_KWMTBOMO01148	2
137	4.07	4.07	11.46	7.962	7.962	P_KWMTBOMO15758	P_KWMTBOMO15758	P_KWMTBOMO15758	2
138	4.06	4.06	7.143	6.513	4.412	P_KWMTBOMO12895	P_KWMTBOMO12895	P_KWMTBOMO12895	2
139	4.04	4.04	21.05	15.13	15.13	P_KWMTBOMO02059	P_KWMTBOMO02059	P_KWMTBOMO02059	2
140	4.03	4.03	33.59	19.31	19.31	P_KWMTBOMO00339	P_KWMTBOMO00339	P_KWMTBOMO00339	2
141	4.01	4.01	5.609	3.222	3.222	P_KWMTBOMO08213	P_KWMTBOMO08213	P_KWMTBOMO08213	2
142	4	4	39.5	19.33	19.33	P_KWMTBOMO15114	P_KWMTBOMO15114	P_KWMTBOMO15114	2
143	4	4	7.883	4.946	4.946	P_KWMTBOMO13370	P_KWMTBOMO13370	P_KWMTBOMO13370	2
144	4	4	5.822	3.196	3.196	P_KWMTBOMO09621	P_KWMTBOMO09621	P_KWMTBOMO09621	2
145	4	4	14.67	11.33	11.33	P_KWMTBOMO02775	P_KWMTBOMO02775	P_KWMTBOMO02775	2
146	4	4	13.64	8.442	8.442	P_KWMTBOMO16524	P_KWMTBOMO16524	P_KWMTBOMO16524	2
147	4	4	5.97	4.264	4.264	P_KWMTBOMO14752	P_KWMTBOMO14752	P_KWMTBOMO14752	2
148	4	4	4.213	4.213	4.213	P_KWMTBOMO15419	P_KWMTBOMO15419	P_KWMTBOMO15419	2
149	4	4	6.321	6.321	6.321	P_KWMTBOMO14804	P_KWMTBOMO14804	P_KWMTBOMO14804	2
150	4	4	10.7	10.7	10.7	P_KWMTBOMO04168	P_KWMTBOMO04168	P_KWMTBOMO04168	2
151	4	4	4.762	4.762	4.762	P_KWMTBOMO02748	P_KWMTBOMO02748	P_KWMTBOMO02748	2
152	4	4	16.85	16.85	16.85	P_KWMTBOMO00860	P_KWMTBOMO00860	P_KWMTBOMO00860	2
153	3.92	3.92	4.264	2.452	2.452	P_KWMTBOMO12667	P_KWMTBOMO12667	P_KWMTBOMO12667	2
155	3.88	3.88	14.34	11.92	6.331	P_KWMTBOMO07323	P_KWMTBOMO07323	P_KWMTBOMO07323	2
156	3.83	3.83	15.28	9.651	9.651	P_KWMTBOMO06231	P_KWMTBOMO06231	P_KWMTBOMO06231	3
157	3.82	3.82	6.003	4.366	4.366	P_KWMTBOMO03177	P_KWMTBOMO03177	P_KWMTBOMO03177	3
158	3.82	3.82	9.859	9.859	9.859	P_KWMTBOMO05566	P_KWMTBOMO05566	P_KWMTBOMO05566	2
159	3.8	3.8	18.92	10.81	10.81	P_KWMTBOMO08064	P_KWMTBOMO08064	P_KWMTBOMO08064	2
160	3.77	3.77	4.444	4.444	4.444	P_KWMTBOMO12659	P_KWMTBOMO12659	P_KWMTBOMO12659	2
161	3.74	3.74	4.93	2.908	2.908	P_KWMTBOMO05612	P_KWMTBOMO05612	P_KWMTBOMO05612	2
162	3.74	3.74	3.122	1.987	1.987	P_KWMTBOMO01790	P_KWMTBOMO01790	P_KWMTBOMO01790	2
163	3.7	3.7	8.776	6.467	6.467	P_KWMTBOMO04605	P_KWMTBOMO04605	P_KWMTBOMO04605	2
164	3.66	3.66	6.349	4.762	4.762	P_KWMTBOMO13567	P_KWMTBOMO13567	P_KWMTBOMO13567	2
165	3.62	3.62	10.19	6.235	4.077	P_KWMTBOMO15357	P_KWMTBOMO15357	P_KWMTBOMO15357	2
166	3.54	3.54	12.55	6.957	1.863	P_KWMTBOMO11666	P_KWMTBOMO11666	P_KWMTBOMO11666	1
167	3.51	3.51	11.82	9.456	4.965	P_KWMTBOMO11083	P_KWMTBOMO11083	P_KWMTBOMO11083	2
168	3.5	3.5	7.717	6.752	3.537	P_KWMTBOMO02432	P_KWMTBOMO02432	P_KWMTBOMO02432	2
169	3.43	4.67	26.79	26.79	26.79	P_KWMTBOMO09230	P_KWMTBOMO09230	P_KWMTBOMO09230	3
170	3.36	3.36	10.09	3.261	3.261	P_KWMTBOMO00687	P_KWMTBOMO00687	P_KWMTBOMO00687	2
171	3.36	3.36	8.845	6.388	6.388	P_KWMTBOMO02835	P_KWMTBOMO02835	P_KWMTBOMO02835	2
172	3.31	3.31	13.73	10.59	10.59	P_KWMTBOMO10916	P_KWMTBOMO10916	P_KWMTBOMO10916	2
173	3.27	3.27	1.668	1.668	1.668	P_KWMTBOMO04676	P_KWMTBOMO04676	P_KWMTBOMO04676	2
174	3.22	3.22	20.93	20.93	14.73	P_KWMTBOMO05723	P_KWMTBOMO05723	P_KWMTBOMO05723	3
175	3.21	3.21	21.65	21.65	21.65	P_KWMTBOMO01918	P_KWMTBOMO01918	P_KWMTBOMO01918	2
176	3.19	3.19	24.06	14.97	10.7	P_KWMTBOMO12428	P_KWMTBOMO12428	P_KWMTBOMO12428	3
177	3.17	3.17	7.957	5.591	5.591	P_KWMTBOMO07811	P_KWMTBOMO07811	P_KWMTBOMO07811	2
178	3.15	3.15	14.71	9.655	5.747	P_KWMTBOMO09054	P_KWMTBOMO09054	P_KWMTBOMO09054	2
179	3.13	3.13	22.06	13.73	5.882	P_KWMTBOMO01273	P_KWMTBOMO01273	P_KWMTBOMO01273	1
180	3.12	3.12	20.32	17.11	17.11	P_KWMTBOMO07857	P_KWMTBOMO07857	P_KWMTBOMO07857	2
181	3.11	3.11	10.14	6.232	2.029	P_KWMTBOMO14549	P_KWMTBOMO14549	P_KWMTBOMO14549	1
182	3.1	3.1	8.432	5.565	3.204	P_KWMTBOMO00834	P_KWMTBOMO00834	P_KWMTBOMO00834	2
183	3.08	3.08	5.618	5.618	5.618	P_KWMTBOMO02840	P_KWMTBOMO02840	P_KWMTBOMO02840	2
184	3.06	3.06	14.69	3.955	3.955	P_KWMTBOMO02994	P_KWMTBOMO02994	P_KWMTBOMO02994	2
185	3.04	3.04	38.56	24.84	18.95	P_KWMTBOMO08820	P_KWMTBOMO08820	P_KWMTBOMO08820	2
187	2.95	2.95	10.24	10.24	10.24	P_KWMTBOMO08535	P_KWMTBOMO08535	P_KWMTBOMO08535	2
188	2.93	2.93	4.746	3.601	3.601	P_KWMTBOMO05572	P_KWMTBOMO05572	P_KWMTBOMO05572	2
189	2.87	2.87	5.466	5.466	5.466	P_KWMTBOMO11680	P_KWMTBOMO11680	P_KWMTBOMO11680	2
190	2.86	2.86	45.24	29.76	29.76	P_KWMTBOMO03951	P_KWMTBOMO03951	P_KWMTBOMO03951	3
191	2.79	2.79	6.413	6.413	6.413	P_KWMTBOMO08893	P_KWMTBOMO08893	P_KWMTBOMO08893	2
192	2.77	2.77	16.72	8.978	5.263	P_KWMTBOMO03986	P_KWMTBOMO03986	P_KWMTBOMO03986	2
193	2.73	2.73	19.68	12.13	12.13	P_KWMTBOMO06660	P_KWMTBOMO06660	P_KWMTBOMO06660	3
194	2.72	2.73	11.04	7.357	3.134	P_KWMTBOMO03430	P_KWMTBOMO03430	P_KWMTBOMO03430	2
195	2.72	2.72	7.394	5.73	5.73	P_KWMTBOMO06760	P_KWMTBOMO06760	P_KWMTBOMO06760	2
196	2.65	2.65	7.354	4.202	1.719	P_KWMTBOMO09055	P_KWMTBOMO09055	P_KWMTBOMO09055	1
198	2.6	2.6	18.38	8.078	8.078	P_KWMTBOMO08607	P_KWMTBOMO08607	P_KWMTBOMO08607	2
199	2.57	2.57	5.78	3.699	1.503	P_KWMTBOMO06595	P_KWMTBOMO06595	P_KWMTBOMO06595	1
200	2.55	2.55	20.19	13.46	12.5	P_KWMTBOMO06974	P_KWMTBOMO06974	P_KWMTBOMO06974	1
201	2.54	2.54	15.44	10.14	7.373	P_KWMTBOMO01114	P_KWMTBOMO01114	P_KWMTBOMO01114	2
202	2.5	2.5	13.33	13.33	13.33	P_KWMTBOMO09355	P_KWMTBOMO09355	P_KWMTBOMO09355	2
203	2.48	2.48	3.894	3.894	2.655	P_KWMTBOMO08578	P_KWMTBOMO08578	P_KWMTBOMO08578	1
204	2.44	2.44	11.81	6.458	2.952	P_KWMTBOMO14887	P_KWMTBOMO14887	P_KWMTBOMO14887	1
205	2.41	2.41	9.325	6.431	4.18	P_KWMTBOMO01312	P_KWMTBOMO01312	P_KWMTBOMO01312	1
207	2.33	2.33	12.4	12.4	6.977	P_KWMTBOMO03173	P_KWMTBOMO03173	P_KWMTBOMO03173	1
208	2.29	2.29	3.741	2.734	1.439	P_KWMTBOMO10493	P_KWMTBOMO10493	P_KWMTBOMO10493	1
209	2.2	2.2	2.517	2.517	1.818	P_KWMTBOMO15060	P_KWMTBOMO15060	P_KWMTBOMO15060	1
210	2.19	2.19	9.227	4.506	2.79	P_KWMTBOMO02500	P_KWMTBOMO02500	P_KWMTBOMO02500	1
211	2.18	4.09	8.238	8.238	5.492	P_KWMTBOMO15123	P_KWMTBOMO15123	P_KWMTBOMO15123	2
212	2.16	2.16	11.49	11.49	6.757	P_KWMTBOMO07930	P_KWMTBOMO07930	P_KWMTBOMO07930	1
213	2.13	2.13	8.475	0.9322	0.9322	P_KWMTBOMO09542	P_KWMTBOMO09542	P_KWMTBOMO09542	1
214	2.13	2.13	20.29	7.826	7.826	P_KWMTBOMO12903	P_KWMTBOMO12903	P_KWMTBOMO12903	2
215	2.13	2.13	7.591	7.591	5.281	P_KWMTBOMO03169	P_KWMTBOMO03169	P_KWMTBOMO03169	1
216	2.12	2.12	4.849	4.849	3.01	P_KWMTBOMO12208	P_KWMTBOMO12208	P_KWMTBOMO12208	1
217	2.1	2.1	2.892	1.891	1.891	P_KWMTBOMO07274	P_KWMTBOMO07274	P_KWMTBOMO07274	1
218	2.09	2.09	39.35	13.55	8.387	P_KWMTBOMO05068	P_KWMTBOMO05068	P_KWMTBOMO05068	2
219	2.07	2.07	6.687	3.647	3.647	P_KWMTBOMO08776	P_KWMTBOMO08776	P_KWMTBOMO08776	1
220	2.06	2.06	4.078	2.33	2.33	P_KWMTBOMO07952	P_KWMTBOMO07952	P_KWMTBOMO07952	1
221	2.06	2.06	11.54	6.044	6.044	P_KWMTBOMO04529	P_KWMTBOMO04529	P_KWMTBOMO04529	1
222	2.03	2.03	7.323	2.778	2.778	P_KWMTBOMO15518	P_KWMTBOMO15518	P_KWMTBOMO15518	1
223	2.03	2.03	7.265	2.35	2.35	P_KWMTBOMO13729	P_KWMTBOMO13729	P_KWMTBOMO13729	1
224	2.03	2.03	4.971	1.912	1.912	P_KWMTBOMO12264	P_KWMTBOMO12264	P_KWMTBOMO12264	1
225	2.03	2.03	19.37	8.75	8.75	P_KWMTBOMO07772	P_KWMTBOMO07772	P_KWMTBOMO07772	1
226	2.03	2.03	15.2	6.373	6.373	P_KWMTBOMO02734	P_KWMTBOMO02734	P_KWMTBOMO02734	1
227	2.02	3.06	2.09	0.4837	0.3676	P_KWMTBOMO08740	P_KWMTBOMO08740	P_KWMTBOMO08740	2
228	2.02	2.02	10.29	4.485	4.485	P_KWMTBOMO05258	P_KWMTBOMO05258	P_KWMTBOMO05258	1
229	2.02	2.02	1.492	0.8032	0.8032	P_KWMTBOMO06334	P_KWMTBOMO06334	P_KWMTBOMO06334	1
230	2.01	2.01	26.52	8.333	8.333	P_KWMTBOMO09788	P_KWMTBOMO09788	P_KWMTBOMO09788	1
231	2.01	2.01	4.151	1.099	1.099	P_KWMTBOMO00303	P_KWMTBOMO00303	P_KWMTBOMO00303	1
232	2.01	2.01	1.687	1.687	1.091	P_KWMTBOMO12350	P_KWMTBOMO12350	P_KWMTBOMO12350	1
233	2	3.7	3.641	3.641	3.641	P_KWMTBOMO09034	P_KWMTBOMO09034	P_KWMTBOMO09034	2
234	2	2	5.949	0.6544	0.6544	P_KWMTBOMO09747	P_KWMTBOMO09747	P_KWMTBOMO09747	2
235	2	2	4.83	0.8669	0.8669	P_KWMTBOMO15715	P_KWMTBOMO15715	P_KWMTBOMO15715	1
236	2	2	16.74	6.422	2.523	P_KWMTBOMO09591	P_KWMTBOMO09591	P_KWMTBOMO09591	1
237	2	2	2.309	0.8722	0.8722	P_KWMTBOMO12968	P_KWMTBOMO12968	P_KWMTBOMO12968	1
238	2	2	8.525	2.765	2.765	P_KWMTBOMO12165	P_KWMTBOMO12165	P_KWMTBOMO12165	1
239	2	2	8.735	3.614	3.614	P_KWMTBOMO12057	P_KWMTBOMO12057	P_KWMTBOMO12057	1
240	2	2	7.069	2.069	2.069	P_KWMTBOMO11590	P_KWMTBOMO11590	P_KWMTBOMO11590	1
241	2	2	9.794	4.124	4.124	P_KWMTBOMO10299	P_KWMTBOMO10299	P_KWMTBOMO10299	1
242	2	2	13.04	6.763	6.763	P_KWMTBOMO08106	P_KWMTBOMO08106	P_KWMTBOMO08106	1
243	2	2	7.209	2.957	2.957	P_KWMTBOMO06999	P_KWMTBOMO06999	P_KWMTBOMO06999	1
244	2	2	13.35	3.815	3.815	P_KWMTBOMO04370	P_KWMTBOMO04370	P_KWMTBOMO04370	1
245	2	2	8.842	4	4	P_KWMTBOMO01315	P_KWMTBOMO01315	P_KWMTBOMO01315	1
246	2	2	4.613	1.746	1.746	P_KWMTBOMO01072	P_KWMTBOMO01072	P_KWMTBOMO01072	1
247	2	2	25	6.818	6.818	P_KWMTBOMO01055	P_KWMTBOMO01055	P_KWMTBOMO01055	1
248	2	2	3.484	1.916	1.916	P_KWMTBOMO14633	P_KWMTBOMO14633	P_KWMTBOMO14633	1
249	2	2	4.891	2.174	2.174	P_KWMTBOMO14483	P_KWMTBOMO14483	P_KWMTBOMO14483	1
250	2	2	9.028	4.514	4.514	P_KWMTBOMO11202	P_KWMTBOMO11202	P_KWMTBOMO11202	1
251	2	2	4.938	3.086	3.086	P_KWMTBOMO09385	P_KWMTBOMO09385	P_KWMTBOMO09385	1
252	2	2	9.408	5.923	5.923	P_KWMTBOMO08930	P_KWMTBOMO08930	P_KWMTBOMO08930	1
253	2	2	6.477	3.886	3.886	P_KWMTBOMO07780	P_KWMTBOMO07780	P_KWMTBOMO07780	1
254	2	2	3.186	2.696	2.696	P_KWMTBOMO07554	P_KWMTBOMO07554	P_KWMTBOMO07554	1
255	2	2	2.013	2.013	1.151	P_KWMTBOMO04806	P_KWMTBOMO04806	P_KWMTBOMO04806	1
256	2	2	10.62	4.396	4.396	P_KWMTBOMO04789	P_KWMTBOMO04789	P_KWMTBOMO04789	1
257	2	2	4.887	2.82	2.82	P_KWMTBOMO03722	P_KWMTBOMO03722	P_KWMTBOMO03722	1
258	2	2	5.848	3.509	3.509	P_KWMTBOMO00881	P_KWMTBOMO00881	P_KWMTBOMO00881	1
259	2	2	12.32	12.32	5.213	P_KWMTBOMO00794	P_KWMTBOMO00794	P_KWMTBOMO00794	1
260	2	2	3.874	3.874	3.874	P_KWMTBOMO16261	P_KWMTBOMO16261	P_KWMTBOMO16261	1
261	2	2	3.077	3.077	3.077	P_KWMTBOMO15781	P_KWMTBOMO15781	P_KWMTBOMO15781	1
262	2	2	3.743	3.743	3.743	P_KWMTBOMO15712	P_KWMTBOMO15712	P_KWMTBOMO15712	1
263	2	2	12.16	12.16	12.16	P_KWMTBOMO14440	P_KWMTBOMO14440	P_KWMTBOMO14440	1
264	2	2	6.19	6.19	6.19	P_KWMTBOMO13641	P_KWMTBOMO13641	P_KWMTBOMO13641	1
265	2	2	1.674	1.674	1.674	P_KWMTBOMO13230	P_KWMTBOMO13230	P_KWMTBOMO13230	1
266	2	2	3.015	3.015	3.015	P_KWMTBOMO12902	P_KWMTBOMO12902	P_KWMTBOMO12902	1
267	2	2	16.92	16.92	16.92	P_KWMTBOMO12400	P_KWMTBOMO12400	P_KWMTBOMO12400	1
268	2	2	8.621	8.621	8.621	P_KWMTBOMO11771	P_KWMTBOMO11771	P_KWMTBOMO11771	1
269	2	2	2.424	2.424	2.424	P_KWMTBOMO09954	P_KWMTBOMO09954	P_KWMTBOMO09954	1
270	2	2	4.669	4.669	4.669	P_KWMTBOMO08542	P_KWMTBOMO08542	P_KWMTBOMO08542	1
271	2	2	5.263	5.263	5.263	P_KWMTBOMO08323	P_KWMTBOMO08323	P_KWMTBOMO08323	1
272	2	2	2.494	2.494	2.494	P_KWMTBOMO08194	P_KWMTBOMO08194	P_KWMTBOMO08194	1
273	2	2	17.39	17.39	17.39	P_KWMTBOMO08193	P_KWMTBOMO08193	P_KWMTBOMO08193	1
274	2	2	3.125	3.125	3.125	P_KWMTBOMO08022	P_KWMTBOMO08022	P_KWMTBOMO08022	1
275	2	2	3.364	3.364	3.364	P_KWMTBOMO06763	P_KWMTBOMO06763	P_KWMTBOMO06763	1
276	2	2	2.484	2.484	2.484	P_KWMTBOMO06731	P_KWMTBOMO06731	P_KWMTBOMO06731	1
277	2	2	4.71	4.71	4.71	P_KWMTBOMO06621	P_KWMTBOMO06621	P_KWMTBOMO06621	1
278	2	2	9.231	9.231	9.231	P_KWMTBOMO06373	P_KWMTBOMO06373	P_KWMTBOMO06373	1
279	2	2	5.072	5.072	5.072	P_KWMTBOMO05975	P_KWMTBOMO05975	P_KWMTBOMO05975	1
280	2	2	2.107	2.107	2.107	P_KWMTBOMO05631	P_KWMTBOMO05631	P_KWMTBOMO05631	1
281	2	2	2.936	2.936	2.936	P_KWMTBOMO03631	P_KWMTBOMO03631	P_KWMTBOMO03631	1
282	2	2	9.524	9.524	9.524	P_KWMTBOMO03601	P_KWMTBOMO03601	P_KWMTBOMO03601	1
283	2	2	5.725	5.725	5.725	P_KWMTBOMO03550	P_KWMTBOMO03550	P_KWMTBOMO03550	1
284	2	2	7.661	7.661	7.661	P_KWMTBOMO02460	P_KWMTBOMO02460	P_KWMTBOMO02460	2
285	2	2	11.11	11.11	11.11	P_KWMTBOMO02431	P_KWMTBOMO02431	P_KWMTBOMO02431	1
286	2	2	6.024	6.024	6.024	P_KWMTBOMO02185	P_KWMTBOMO02185	P_KWMTBOMO02185	1
287	1.92	2	7.48	5.512	5.512	P_KWMTBOMO11558	P_KWMTBOMO11558	P_KWMTBOMO11558	1
288	1.92	1.92	1.769	1.769	1.769	P_KWMTBOMO03122	P_KWMTBOMO03122	P_KWMTBOMO03122	1
289	1.89	1.89	1.567	1.567	1.567	P_KWMTBOMO13235	P_KWMTBOMO13235	P_KWMTBOMO13235	1
290	1.88	1.88	20.59	8.333	8.333	P_KWMTBOMO03314	P_KWMTBOMO03314	P_KWMTBOMO03314	2
291	1.85	1.85	2.844	1.738	1.738	P_KWMTBOMO06803	P_KWMTBOMO06803	P_KWMTBOMO06803	1
292	1.85	1.85	2.111	2.111	2.111	P_KWMTBOMO07076	P_KWMTBOMO07076	P_KWMTBOMO07076	1
293	1.8	1.8	4.046	4.046	4.046	P_KWMTBOMO00545	P_KWMTBOMO00545	P_KWMTBOMO00545	1
294	1.77	1.77	12.26	8.602	3.656	P_KWMTBOMO14761	P_KWMTBOMO14761	P_KWMTBOMO14761	2
295	1.74	1.74	8.257	8.257	8.257	P_KWMTBOMO15592	P_KWMTBOMO15592	P_KWMTBOMO15592	1
296	1.7	1.7	8.215	4.816	4.816	P_KWMTBOMO14877	P_KWMTBOMO14877	P_KWMTBOMO14877	1
297	1.7	1.7	4.228	2.114	2.114	P_KWMTBOMO10169	P_KWMTBOMO10169	P_KWMTBOMO10169	1
298	1.68	1.68	10.63	2.532	2.532	P_KWMTBOMO08310	P_KWMTBOMO08310	P_KWMTBOMO08310	1
299	1.66	1.66	8.372	8.372	8.372	P_KWMTBOMO06076	P_KWMTBOMO06076	P_KWMTBOMO06076	1
300	1.62	1.62	6.36	2.412	2.412	P_KWMTBOMO13287	P_KWMTBOMO13287	P_KWMTBOMO13287	1
301	1.62	1.62	6.623	6.623	6.623	P_KWMTBOMO09000	P_KWMTBOMO09000	P_KWMTBOMO09000	1
302	1.6	1.6	1.475	0.9587	0.9587	P_KWMTBOMO09433	P_KWMTBOMO09433	P_KWMTBOMO09433	1
303	1.59	1.59	14.71	14.71	14.71	P_KWMTBOMO07600	P_KWMTBOMO07600	P_KWMTBOMO07600	1
304	1.57	1.57	15.04	9.735	9.735	P_KWMTBOMO08961	P_KWMTBOMO08961	P_KWMTBOMO08961	1
305	1.57	1.57	7.037	4.444	4.444	P_KWMTBOMO08201	P_KWMTBOMO08201	P_KWMTBOMO08201	1
306	1.55	1.57	5.789	5.789	5.789	P_KWMTBOMO14024	P_KWMTBOMO14024	P_KWMTBOMO14024	1
307	1.51	1.51	8.911	3.96	3.96	P_KWMTBOMO02857	P_KWMTBOMO02857	P_KWMTBOMO02857	1
308	1.51	1.51	4.895	4.895	4.895	P_KWMTBOMO05700	P_KWMTBOMO05700	P_KWMTBOMO05700	1
309	1.49	1.49	16.82	16.82	10.28	P_KWMTBOMO10128	P_KWMTBOMO10128	P_KWMTBOMO10128	1
310	1.48	1.48	14.71	10.78	5.392	P_KWMTBOMO01502	P_KWMTBOMO01502	P_KWMTBOMO01502	1
311	1.48	1.48	1.252	1.252	1.252	P_KWMTBOMO04768	P_KWMTBOMO04768	P_KWMTBOMO04768	1
312	1.46	1.46	11.72	11.72	11.72	P_KWMTBOMO00786	P_KWMTBOMO00786	P_KWMTBOMO00786	1
313	1.45	1.45	17.89	7.895	7.895	P_KWMTBOMO03113	P_KWMTBOMO03113	P_KWMTBOMO03113	1
314	1.45	1.45	12.61	12.61	6.723	P_KWMTBOMO01068	P_KWMTBOMO01068	P_KWMTBOMO01068	1
315	1.44	1.44	2.239	2.239	2.239	P_KWMTBOMO11689	P_KWMTBOMO11689	P_KWMTBOMO11689	1
316	1.43	1.43	25.17	14.29	14.29	P_KWMTBOMO12483	P_KWMTBOMO12483	P_KWMTBOMO12483	2
317	1.42	1.42	4.101	4.101	4.101	P_KWMTBOMO03337	P_KWMTBOMO03337	P_KWMTBOMO03337	1
318	1.4	1.4	14	9	5	P_KWMTBOMO02477	P_KWMTBOMO02477	P_KWMTBOMO02477	1
319	1.4	1.4	1.472	1.472	1.472	P_KWMTBOMO14536	P_KWMTBOMO14536	P_KWMTBOMO14536	1
320	1.39	1.4	11.94	7.463	7.463	P_KWMTBOMO04691	P_KWMTBOMO04691	P_KWMTBOMO04691	1
321	1.37	1.37	3.344	1.726	1.079	P_KWMTBOMO04610	P_KWMTBOMO04610	P_KWMTBOMO04610	1
322	1.36	1.36	4.651	4.651	4.651	P_KWMTBOMO09390	P_KWMTBOMO09390	P_KWMTBOMO09390	1
323	1.33	1.33	3.02	1.618	1.618	P_KWMTBOMO15176	P_KWMTBOMO15176	P_KWMTBOMO15176	1
324	1.33	1.33	1.747	1.747	1.747	P_KWMTBOMO07679	P_KWMTBOMO07679	P_KWMTBOMO07679	1
325	1.32	1.32	1.203	0.3481	0.3481	P_KWMTBOMO05680	P_KWMTBOMO05680	P_KWMTBOMO05680	1

## Sheet: fibL_L5D5
N	Unused	Total	%Cov	%Cov(50)	%Cov(95)	Accession	Citable Accession	Name	Peptides(95%)
4	34.89	34.89	30.18	25.9	24.1	P_KWMTBOMO00462	P_KWMTBOMO00462	P_KWMTBOMO00462	23
8	32.35	32.35	49.54	37.33	34.1	P_KWMTBOMO06229	P_KWMTBOMO06229	P_KWMTBOMO06229	21
21	23.47	23.47	24.3	18.9	14.1	P_KWMTBOMO13293	P_KWMTBOMO13293	P_KWMTBOMO13293	14
22	22.93	22.93	50.63	50.63	48.74	P_KWMTBOMO05178	P_KWMTBOMO05178	P_KWMTBOMO05178	14
26	19.17	19.17	34.43	29.67	25.64	P_KWMTBOMO09442	P_KWMTBOMO09442	P_KWMTBOMO09442	9
30	17.82	17.82	22.22	18.03	18.03	P_KWMTBOMO00927	P_KWMTBOMO00927	P_KWMTBOMO00927	9
32	17.24	17.24	26.76	24.41	20.9	P_KWMTBOMO04502	P_KWMTBOMO04502	P_KWMTBOMO04502	9
35	16.31	16.31	28.75	27.52	22.63	P_KWMTBOMO06763	P_KWMTBOMO06763	P_KWMTBOMO06763	10
36	15.87	15.87	36.81	36.81	25	P_KWMTBOMO09553	P_KWMTBOMO09553	P_KWMTBOMO09553	10
42	14.99	14.99	26.33	24.14	21.32	P_KWMTBOMO01148	P_KWMTBOMO01148	P_KWMTBOMO01148	11
43	14.93	14.93	14.57	12.67	9.681	P_KWMTBOMO05541	P_KWMTBOMO05541	P_KWMTBOMO05541	8
44	14.85	14.85	6.94	4.891	3.303	P_KWMTBOMO08648	P_KWMTBOMO08648	P_KWMTBOMO08648	6
45	14.76	14.76	18.94	16.67	12.95	P_KWMTBOMO15357	P_KWMTBOMO15357	P_KWMTBOMO15357	7
48	14.43	14.43	23.54	16.95	16.95	P_KWMTBOMO09808	P_KWMTBOMO09808	P_KWMTBOMO09808	9
49	14.37	14.37	32.78	32.78	29.14	P_KWMTBOMO12389	P_KWMTBOMO12389	P_KWMTBOMO12389	7
50	14.27	14.27	9.901	8.828	7.591	P_KWMTBOMO12628	P_KWMTBOMO12628	P_KWMTBOMO12628	8
53	14.09	14.09	17.57	11.56	8.786	P_KWMTBOMO06595	P_KWMTBOMO06595	P_KWMTBOMO06595	7
54	13.77	13.77	23.34	18.64	11.83	P_KWMTBOMO11096	P_KWMTBOMO11096	P_KWMTBOMO11096	7
55	13.54	13.54	20.94	19.87	18.38	P_KWMTBOMO02470	P_KWMTBOMO02470	P_KWMTBOMO02470	7
59	12.85	12.85	59.6	47.68	43.05	P_KWMTBOMO08440	P_KWMTBOMO08440	P_KWMTBOMO08440	6
60	12.85	12.85	19.85	19.85	16.7	P_KWMTBOMO01075	P_KWMTBOMO01075	P_KWMTBOMO01075	7
61	12.74	12.74	17.16	14.22	12.36	P_KWMTBOMO13370	P_KWMTBOMO13370	P_KWMTBOMO13370	9
62	12.7	12.7	13.94	8.405	6.877	P_KWMTBOMO09055	P_KWMTBOMO09055	P_KWMTBOMO09055	7
65	12.2	12.2	35.67	32	23.67	P_KWMTBOMO14732	P_KWMTBOMO14732	P_KWMTBOMO14732	7
70	11.95	11.95	25.23	16.76	12.61	P_KWMTBOMO03626	P_KWMTBOMO03626	P_KWMTBOMO03626	7
76	11.07	11.07	37.63	37.63	25.26	P_KWMTBOMO11255	P_KWMTBOMO11255	P_KWMTBOMO11255	6
78	10.88	10.88	11.47	9.401	7.955	P_KWMTBOMO07589	P_KWMTBOMO07589	P_KWMTBOMO07589	6
80	10.72	10.72	36.07	33.33	33.33	P_KWMTBOMO06480	P_KWMTBOMO06480	P_KWMTBOMO06480	7
82	10.5	10.5	45.95	37.39	37.39	P_KWMTBOMO01424	P_KWMTBOMO01424	P_KWMTBOMO01424	9
83	10.45	10.45	8.198	7.443	5.933	P_KWMTBOMO04610	P_KWMTBOMO04610	P_KWMTBOMO04610	5
84	10.36	10.36	14.29	9.756	6.736	P_KWMTBOMO00427	P_KWMTBOMO00427	P_KWMTBOMO00427	5
85	10.3	10.3	26.32	19.74	19.74	P_KWMTBOMO01720	P_KWMTBOMO01720	P_KWMTBOMO01720	6
86	10.1	10.1	13.69	7.158	7.158	P_KWMTBOMO05741	P_KWMTBOMO05741	P_KWMTBOMO05741	5
88	10.07	10.07	20.34	13.99	13.99	P_KWMTBOMO07855	P_KWMTBOMO07855	P_KWMTBOMO07855	6
90	9.69	9.69	23.1	16.67	13.81	P_KWMTBOMO02081	P_KWMTBOMO02081	P_KWMTBOMO02081	6
91	9.44	9.44	18.17	16.51	12.29	P_KWMTBOMO13721	P_KWMTBOMO13721	P_KWMTBOMO13721	5
92	9.34	9.34	27.42	21.51	17.49	P_KWMTBOMO00375	P_KWMTBOMO00375	P_KWMTBOMO00375	4
93	9.08	9.08	27.79	18.73	16.01	P_KWMTBOMO07103	P_KWMTBOMO07103	P_KWMTBOMO07103	5
95	9.03	9.03	6.575	5.845	5.845	P_KWMTBOMO04906	P_KWMTBOMO04906	P_KWMTBOMO04906	5
96	9	9	10.58	5.13	4.42	P_KWMTBOMO03067	P_KWMTBOMO03067	P_KWMTBOMO03067	5
97	8.87	8.87	41.58	38.61	30.2	P_KWMTBOMO15361	P_KWMTBOMO15361	P_KWMTBOMO15361	6
99	8.8	8.8	13.22	9.537	7.902	P_KWMTBOMO03430	P_KWMTBOMO03430	P_KWMTBOMO03430	4
100	8.63	8.63	29.41	23.53	23.53	P_KWMTBOMO10248	P_KWMTBOMO10248	P_KWMTBOMO10248	7
101	8.61	8.61	8.592	5.85	4.845	P_KWMTBOMO09183	P_KWMTBOMO09183	P_KWMTBOMO09183	4
102	8.42	8.42	6.576	4.13	2.663	P_KWMTBOMO12285	P_KWMTBOMO12285	P_KWMTBOMO12285	6
103	8.39	8.39	26.57	21.68	21.68	P_KWMTBOMO08666	P_KWMTBOMO08666	P_KWMTBOMO08666	5
104	8.37	8.37	53.1	53.1	53.1	P_KWMTBOMO08961	P_KWMTBOMO08961	P_KWMTBOMO08961	5
105	8.33	8.83	19.35	16.13	12.69	P_KWMTBOMO14761	P_KWMTBOMO14761	P_KWMTBOMO14761	5
106	8.29	8.29	35.02	31.34	24.42	P_KWMTBOMO09232	P_KWMTBOMO09232	P_KWMTBOMO09232	5
110	8.02	8.02	8.189	6.069	4.624	P_KWMTBOMO04768	P_KWMTBOMO04768	P_KWMTBOMO04768	4
111	8.01	8.01	11.09	7.293	7.293	P_KWMTBOMO00722	P_KWMTBOMO00722	P_KWMTBOMO00722	6
112	8	8	10.57	10.57	10.57	P_KWMTBOMO02835	P_KWMTBOMO02835	P_KWMTBOMO02835	4
113	7.98	7.98	10.31	9.173	7.135	P_KWMTBOMO08045	P_KWMTBOMO08045	P_KWMTBOMO08045	4
114	7.78	7.78	9.482	3.128	2.493	P_KWMTBOMO12878	P_KWMTBOMO12878	P_KWMTBOMO12878	4
115	7.74	7.74	15.69	15.69	15.69	P_KWMTBOMO10916	P_KWMTBOMO10916	P_KWMTBOMO10916	4
117	7.43	8	28.24	13.93	10.69	P_KWMTBOMO12560	P_KWMTBOMO12560	P_KWMTBOMO12560	4
118	7.4	7.4	65.18	65.18	65.18	P_KWMTBOMO09230	P_KWMTBOMO09230	P_KWMTBOMO09230	4
119	7.38	7.38	24.41	24.41	20.66	P_KWMTBOMO16481	P_KWMTBOMO16481	P_KWMTBOMO16481	4
120	7.35	7.35	17.1	13.97	10.29	P_KWMTBOMO10337	P_KWMTBOMO10337	P_KWMTBOMO10337	3
121	7.32	7.32	16.11	12.39	10.27	P_KWMTBOMO08578	P_KWMTBOMO08578	P_KWMTBOMO08578	4
122	7.23	7.23	33.11	33.11	22.52	P_KWMTBOMO13960	P_KWMTBOMO13960	P_KWMTBOMO13960	3
123	7.13	7.13	7.873	6.077	6.077	P_KWMTBOMO15359	P_KWMTBOMO15359	P_KWMTBOMO15359	4
124	7.04	7.04	20.94	17.88	14.35	P_KWMTBOMO09415	P_KWMTBOMO09415	P_KWMTBOMO09415	6
125	7.03	7.03	18.82	17.53	7.011	P_KWMTBOMO14887	P_KWMTBOMO14887	P_KWMTBOMO14887	4
126	6.98	6.98	12.73	11.25	7.011	P_KWMTBOMO00793	P_KWMTBOMO00793	P_KWMTBOMO00793	4
127	6.93	6.93	18.6	18.6	18.6	P_KWMTBOMO02278	P_KWMTBOMO02278	P_KWMTBOMO02278	4
128	6.73	6.73	3.874	2.407	1.58	P_KWMTBOMO06045	P_KWMTBOMO06045	P_KWMTBOMO06045	3
129	6.65	6.65	3.683	1.772	1.39	P_KWMTBOMO07761	P_KWMTBOMO07761	P_KWMTBOMO07761	3
131	6.42	6.42	17.98	13.9	9.537	P_KWMTBOMO04370	P_KWMTBOMO04370	P_KWMTBOMO04370	3
133	6.22	6.22	18.59	18.59	12.18	P_KWMTBOMO16357	P_KWMTBOMO16357	P_KWMTBOMO16357	3
134	6.21	6.82	11.36	7.407	5.309	P_KWMTBOMO12844	P_KWMTBOMO12844	P_KWMTBOMO12844	3
135	6.14	6.14	9.023	3.86	2.356	P_KWMTBOMO08584	P_KWMTBOMO08584	P_KWMTBOMO08584	3
136	6.13	6.14	8.222	8.222	6.31	P_KWMTBOMO12264	P_KWMTBOMO12264	P_KWMTBOMO12264	3
137	6.08	6.08	14.61	12.94	9.186	P_KWMTBOMO08956	P_KWMTBOMO08956	P_KWMTBOMO08956	3
138	6.04	6.04	12.75	8.502	8.502	P_KWMTBOMO11680	P_KWMTBOMO11680	P_KWMTBOMO11680	4
139	6.03	6.03	12.13	10.07	10.07	P_KWMTBOMO15123	P_KWMTBOMO15123	P_KWMTBOMO15123	3
141	6.02	6.02	29.39	24.73	24.73	P_KWMTBOMO06427	P_KWMTBOMO06427	P_KWMTBOMO06427	4
142	6	6.14	48.74	36.13	31.09	P_KWMTBOMO15114	P_KWMTBOMO15114	P_KWMTBOMO15114	4
144	5.93	5.93	13.04	7.578	6.087	P_KWMTBOMO11666	P_KWMTBOMO11666	P_KWMTBOMO11666	4
145	5.84	5.84	21.72	11.62	11.62	P_KWMTBOMO15518	P_KWMTBOMO15518	P_KWMTBOMO15518	4
146	5.82	5.82	37.86	18.57	18.57	P_KWMTBOMO00838	P_KWMTBOMO00838	P_KWMTBOMO00838	4
148	5.7	5.7	5.924	1.382	0.6665	P_KWMTBOMO12602	P_KWMTBOMO12602	P_KWMTBOMO12602	2
150	5.63	5.63	27.88	21.15	14.42	P_KWMTBOMO06974	P_KWMTBOMO06974	P_KWMTBOMO06974	3
151	5.51	5.51	12.96	12.96	12.96	P_KWMTBOMO08655	P_KWMTBOMO08655	P_KWMTBOMO08655	4
153	5.44	5.44	5.932	4.237	2.881	P_KWMTBOMO09542	P_KWMTBOMO09542	P_KWMTBOMO09542	3
154	5.41	5.41	14.07	9.944	5.629	P_KWMTBOMO06770	P_KWMTBOMO06770	P_KWMTBOMO06770	3
155	5.4	5.4	21.05	16.41	11.46	P_KWMTBOMO03986	P_KWMTBOMO03986	P_KWMTBOMO03986	3
156	5.4	5.4	10.09	8.369	8.369	P_KWMTBOMO02500	P_KWMTBOMO02500	P_KWMTBOMO02500	3
157	5.36	5.36	26.47	25.98	20.1	P_KWMTBOMO02734	P_KWMTBOMO02734	P_KWMTBOMO02734	3
158	5.19	5.19	10.14	6.043	6.043	P_KWMTBOMO04170	P_KWMTBOMO04170	P_KWMTBOMO04170	3
159	5.19	5.19	11.72	9.452	7.561	P_KWMTBOMO01606	P_KWMTBOMO01606	P_KWMTBOMO01606	3
160	5.16	5.16	20.21	16.58	16.58	P_KWMTBOMO05281	P_KWMTBOMO05281	P_KWMTBOMO05281	4
161	5.11	5.11	33.33	33.33	27.45	P_KWMTBOMO08820	P_KWMTBOMO08820	P_KWMTBOMO08820	4
162	5.08	5.08	12.74	12.74	10.51	P_KWMTBOMO15758	P_KWMTBOMO15758	P_KWMTBOMO15758	3
163	5.04	5.04	9.239	8.043	8.043	P_KWMTBOMO07723	P_KWMTBOMO07723	P_KWMTBOMO07723	4
164	4.99	4.99	16.09	12.6	5.233	P_KWMTBOMO06354	P_KWMTBOMO06354	P_KWMTBOMO06354	2
165	4.97	4.97	17.51	17.51	17.51	P_KWMTBOMO08596	P_KWMTBOMO08596	P_KWMTBOMO08596	3
166	4.91	4.91	29.95	22.99	18.72	P_KWMTBOMO12428	P_KWMTBOMO12428	P_KWMTBOMO12428	5
168	4.89	4.89	15.3	8.022	8.022	P_KWMTBOMO03311	P_KWMTBOMO03311	P_KWMTBOMO03311	3
169	4.76	4.76	8.458	5.321	4.638	P_KWMTBOMO03177	P_KWMTBOMO03177	P_KWMTBOMO03177	3
170	4.75	4.75	16.46	16.46	16.46	P_KWMTBOMO14479	P_KWMTBOMO14479	P_KWMTBOMO14479	2
171	4.64	4.64	8.222	8.222	6.222	P_KWMTBOMO10283	P_KWMTBOMO10283	P_KWMTBOMO10283	2
172	4.58	4.58	38.42	38.42	26.84	P_KWMTBOMO03113	P_KWMTBOMO03113	P_KWMTBOMO03113	3
173	4.58	4.58	32.68	22.88	22.88	P_KWMTBOMO11021	P_KWMTBOMO11021	P_KWMTBOMO11021	3
174	4.52	4.52	20.33	14.84	11.54	P_KWMTBOMO04529	P_KWMTBOMO04529	P_KWMTBOMO04529	3
175	4.46	4.46	17.28	17.28	9.877	P_KWMTBOMO04168	P_KWMTBOMO04168	P_KWMTBOMO04168	2
176	4.45	4.45	19.63	19.63	19.63	P_KWMTBOMO11448	P_KWMTBOMO11448	P_KWMTBOMO11448	3
177	4.44	4.44	8.671	7.273	7.273	P_KWMTBOMO15060	P_KWMTBOMO15060	P_KWMTBOMO15060	3
178	4.41	4.41	13.73	8.009	5.721	P_KWMTBOMO06660	P_KWMTBOMO06660	P_KWMTBOMO06660	2
179	4.4	4.4	9.073	5.085	2.991	P_KWMTBOMO04051	P_KWMTBOMO04051	P_KWMTBOMO04051	3
180	4.4	4.4	13.72	10.03	7.388	P_KWMTBOMO05258	P_KWMTBOMO05258	P_KWMTBOMO05258	2
182	4.3	4.3	30.5	17.5	13.5	P_KWMTBOMO02477	P_KWMTBOMO02477	P_KWMTBOMO02477	2
183	4.28	4.28	8.647	8.647	6.203	P_KWMTBOMO03722	P_KWMTBOMO03722	P_KWMTBOMO03722	2
185	4.2	4.2	10.75	8.602	6.237	P_KWMTBOMO05564	P_KWMTBOMO05564	P_KWMTBOMO05564	2
188	4.12	4.12	14.05	8.503	5.36	P_KWMTBOMO06999	P_KWMTBOMO06999	P_KWMTBOMO06999	2
189	4.12	4.12	17.18	17.18	11.45	P_KWMTBOMO00837	P_KWMTBOMO00837	P_KWMTBOMO00837	2
191	4.04	4.04	8.748	8.748	5.964	P_KWMTBOMO08204	P_KWMTBOMO08204	P_KWMTBOMO08204	2
192	4.03	4.03	15.54	15.54	8.784	P_KWMTBOMO16197	P_KWMTBOMO16197	P_KWMTBOMO16197	2
193	4.03	4.03	13.85	11.03	11.03	P_KWMTBOMO16309	P_KWMTBOMO16309	P_KWMTBOMO16309	2
194	4.03	4.03	14.62	12.31	12.31	P_KWMTBOMO13405	P_KWMTBOMO13405	P_KWMTBOMO13405	2
195	4.02	4.02	8.489	5.383	5.383	P_KWMTBOMO00473	P_KWMTBOMO00473	P_KWMTBOMO00473	2
196	4	4	7.353	3.743	3.743	P_KWMTBOMO16130	P_KWMTBOMO16130	P_KWMTBOMO16130	2
197	4	4	6.335	3.62	3.62	P_KWMTBOMO11316	P_KWMTBOMO11316	P_KWMTBOMO11316	2
198	4	4	8.497	5.719	5.719	P_KWMTBOMO10779	P_KWMTBOMO10779	P_KWMTBOMO10779	2
200	4	4	5.507	5.507	3.333	P_KWMTBOMO14549	P_KWMTBOMO14549	P_KWMTBOMO14549	2
201	4	4	13.53	11.59	11.59	P_KWMTBOMO08106	P_KWMTBOMO08106	P_KWMTBOMO08106	2
202	4	4	7.379	7.379	7.379	P_KWMTBOMO02392	P_KWMTBOMO02392	P_KWMTBOMO02392	2
203	4	4	41.38	41.38	41.38	P_KWMTBOMO13722	P_KWMTBOMO13722	P_KWMTBOMO13722	2
204	4	4	35.62	35.62	35.62	P_KWMTBOMO08098	P_KWMTBOMO08098	P_KWMTBOMO08098	2
205	4	4	4.383	4.383	4.383	P_KWMTBOMO02535	P_KWMTBOMO02535	P_KWMTBOMO02535	2
206	4	4	16.85	16.85	16.85	P_KWMTBOMO00860	P_KWMTBOMO00860	P_KWMTBOMO00860	2
207	3.96	3.96	9.31	6.379	4.31	P_KWMTBOMO02088	P_KWMTBOMO02088	P_KWMTBOMO02088	2
208	3.96	3.96	6.494	6.494	6.494	P_KWMTBOMO14041	P_KWMTBOMO14041	P_KWMTBOMO14041	2
209	3.92	3.92	5.882	4.241	4.241	P_KWMTBOMO01423	P_KWMTBOMO01423	P_KWMTBOMO01423	2
210	3.91	3.91	18.51	6.941	4.884	P_KWMTBOMO05464	P_KWMTBOMO05464	P_KWMTBOMO05464	2
211	3.87	3.87	28.95	20.53	10.53	P_KWMTBOMO12018	P_KWMTBOMO12018	P_KWMTBOMO12018	2
212	3.85	3.85	17.84	17.84	9.859	P_KWMTBOMO05566	P_KWMTBOMO05566	P_KWMTBOMO05566	2
213	3.82	3.82	39.29	39.29	29.76	P_KWMTBOMO03951	P_KWMTBOMO03951	P_KWMTBOMO03951	3
214	3.75	3.75	10.81	6.757	6.757	P_KWMTBOMO15584	P_KWMTBOMO15584	P_KWMTBOMO15584	2
215	3.75	3.75	31.54	31.54	24.62	P_KWMTBOMO07368	P_KWMTBOMO07368	P_KWMTBOMO07368	2
216	3.73	3.73	26.04	10.14	7.373	P_KWMTBOMO01114	P_KWMTBOMO01114	P_KWMTBOMO01114	2
217	3.7	3.7	12.32	12.32	12.32	P_KWMTBOMO00794	P_KWMTBOMO00794	P_KWMTBOMO00794	2
218	3.68	3.68	2.734	2.734	2.734	P_KWMTBOMO10493	P_KWMTBOMO10493	P_KWMTBOMO10493	2
219	3.62	3.62	14.65	5.492	5.492	P_KWMTBOMO14530	P_KWMTBOMO14530	P_KWMTBOMO14530	2
220	3.62	3.62	2.814	2.814	2.814	P_KWMTBOMO10780	P_KWMTBOMO10780	P_KWMTBOMO10780	2
221	3.6	3.6	31.08	22.97	16.22	P_KWMTBOMO08064	P_KWMTBOMO08064	P_KWMTBOMO08064	2
222	3.6	3.6	10.22	10.22	10.22	P_KWMTBOMO10129	P_KWMTBOMO10129	P_KWMTBOMO10129	2
223	3.57	3.57	8.776	6.467	6.467	P_KWMTBOMO04605	P_KWMTBOMO04605	P_KWMTBOMO04605	2
224	3.56	3.56	6.326	4.866	2.676	P_KWMTBOMO00390	P_KWMTBOMO00390	P_KWMTBOMO00390	2
225	3.52	3.52	2.729	1.287	1.287	P_KWMTBOMO12304	P_KWMTBOMO12304	P_KWMTBOMO12304	2
226	3.51	3.51	12.5	12.5	12.5	P_KWMTBOMO09672	P_KWMTBOMO09672	P_KWMTBOMO09672	2
227	3.46	3.46	10.06	8.101	5.587	P_KWMTBOMO14715	P_KWMTBOMO14715	P_KWMTBOMO14715	3
228	3.43	3.43	11.44	6.745	6.745	P_KWMTBOMO09474	P_KWMTBOMO09474	P_KWMTBOMO09474	2
229	3.39	3.39	18.92	18.92	18.92	P_KWMTBOMO14440	P_KWMTBOMO14440	P_KWMTBOMO14440	2
230	3.39	3.39	5.146	5.146	5.146	P_KWMTBOMO03301	P_KWMTBOMO03301	P_KWMTBOMO03301	2
231	3.36	3.36	5.27	1.734	1.734	P_KWMTBOMO04676	P_KWMTBOMO04676	P_KWMTBOMO04676	2
232	3.36	3.36	3.625	2.452	2.452	P_KWMTBOMO12667	P_KWMTBOMO12667	P_KWMTBOMO12667	2
233	3.31	3.31	10.45	7.463	7.463	P_KWMTBOMO11416	P_KWMTBOMO11416	P_KWMTBOMO11416	2
234	3.22	3.22	12.61	12.61	12.61	P_KWMTBOMO01068	P_KWMTBOMO01068	P_KWMTBOMO01068	2
235	3.19	3.21	12.86	11.19	7.143	P_KWMTBOMO16204	P_KWMTBOMO16204	P_KWMTBOMO16204	2
236	3.13	6.64	11.82	7.416	6.489	P_KWMTBOMO14157	P_KWMTBOMO14157	P_KWMTBOMO14157	4
237	3.1	3.1	10.14	7.692	7.692	P_KWMTBOMO03860	P_KWMTBOMO03860	P_KWMTBOMO03860	2
238	3.05	3.05	6.747	6.747	6.747	P_KWMTBOMO10965	P_KWMTBOMO10965	P_KWMTBOMO10965	2
239	2.98	2.98	19.6	16	12.4	P_KWMTBOMO04427	P_KWMTBOMO04427	P_KWMTBOMO04427	2
240	2.97	2.97	13.15	10.36	10.36	P_KWMTBOMO11741	P_KWMTBOMO11741	P_KWMTBOMO11741	2
241	2.96	2.96	3.974	2.081	2.081	P_KWMTBOMO01790	P_KWMTBOMO01790	P_KWMTBOMO01790	2
242	2.95	2.95	20.51	20.51	3.846	P_KWMTBOMO15665	P_KWMTBOMO15665	P_KWMTBOMO15665	1
243	2.86	2.86	9.818	5.61	3.647	P_KWMTBOMO11336	P_KWMTBOMO11336	P_KWMTBOMO11336	2
244	2.85	2.85	13.75	13.75	13.75	P_KWMTBOMO07772	P_KWMTBOMO07772	P_KWMTBOMO07772	2
245	2.82	2.82	28.79	18.18	18.18	P_KWMTBOMO01055	P_KWMTBOMO01055	P_KWMTBOMO01055	3
246	2.81	2.81	5.014	4.178	4.178	P_KWMTBOMO10358	P_KWMTBOMO10358	P_KWMTBOMO10358	2
247	2.81	2.81	15.53	15.53	15.53	P_KWMTBOMO07061	P_KWMTBOMO07061	P_KWMTBOMO07061	2
248	2.78	2.78	9.651	6.702	6.702	P_KWMTBOMO06231	P_KWMTBOMO06231	P_KWMTBOMO06231	2
249	2.76	2.76	17.28	17.28	17.28	P_KWMTBOMO03622	P_KWMTBOMO03622	P_KWMTBOMO03622	2
250	2.74	2.74	20.09	13.24	9.132	P_KWMTBOMO08894	P_KWMTBOMO08894	P_KWMTBOMO08894	2
251	2.73	2.74	10.1	4.158	4.158	P_KWMTBOMO07374	P_KWMTBOMO07374	P_KWMTBOMO07374	2
252	2.7	2.7	1.276	1.276	1.276	P_KWMTBOMO10397	P_KWMTBOMO10397	P_KWMTBOMO10397	1
253	2.58	2.58	26.87	17.91	10.45	P_KWMTBOMO14639	P_KWMTBOMO14639	P_KWMTBOMO14639	1
254	2.53	2.53	18.15	6.95	4.247	P_KWMTBOMO04469	P_KWMTBOMO04469	P_KWMTBOMO04469	1
255	2.51	2.51	5.388	5.388	2.802	P_KWMTBOMO00373	P_KWMTBOMO00373	P_KWMTBOMO00373	1
256	2.49	2.49	9.307	9.307	2.814	P_KWMTBOMO15547	P_KWMTBOMO15547	P_KWMTBOMO15547	1
257	2.48	2.49	19.69	8.268	8.268	P_KWMTBOMO04594	P_KWMTBOMO04594	P_KWMTBOMO04594	2
258	2.46	2.46	3.276	2.5	1.207	P_KWMTBOMO01806	P_KWMTBOMO01806	P_KWMTBOMO01806	1
259	2.44	2.44	3.23	3.23	1.545	P_KWMTBOMO13226	P_KWMTBOMO13226	P_KWMTBOMO13226	1
260	2.42	2.42	18.97	18.97	13.33	P_KWMTBOMO09355	P_KWMTBOMO09355	P_KWMTBOMO09355	2
261	2.41	2.41	9.04	4.896	2.448	P_KWMTBOMO02994	P_KWMTBOMO02994	P_KWMTBOMO02994	1
262	2.4	2.4	3.272	2.439	1.368	P_KWMTBOMO09747	P_KWMTBOMO09747	P_KWMTBOMO09747	3
263	2.36	2.36	21.85	21.01	15.97	P_KWMTBOMO12706	P_KWMTBOMO12706	P_KWMTBOMO12706	2
265	2.35	2.35	8.039	7.074	2.251	P_KWMTBOMO02432	P_KWMTBOMO02432	P_KWMTBOMO02432	1
266	2.34	2.34	5.851	3.59	2.394	P_KWMTBOMO14942	P_KWMTBOMO14942	P_KWMTBOMO14942	1
267	2.24	2.24	18.84	6.533	3.015	P_KWMTBOMO12166	P_KWMTBOMO12166	P_KWMTBOMO12166	1
268	2.24	2.24	11.85	9.953	7.346	P_KWMTBOMO08503	P_KWMTBOMO08503	P_KWMTBOMO08503	2
269	2.2	2.2	4.016	2.547	1.567	P_KWMTBOMO13235	P_KWMTBOMO13235	P_KWMTBOMO13235	1
270	2.14	2.14	7.087	2.677	1.89	P_KWMTBOMO08773	P_KWMTBOMO08773	P_KWMTBOMO08773	1
271	2.13	2.13	15.71	3.333	2.381	P_KWMTBOMO07205	P_KWMTBOMO07205	P_KWMTBOMO07205	1
272	2.13	2.13	16.06	10.95	6.934	P_KWMTBOMO01796	P_KWMTBOMO01796	P_KWMTBOMO01796	1
273	2.11	2.11	8.257	3.899	2.523	P_KWMTBOMO05987	P_KWMTBOMO05987	P_KWMTBOMO05987	1
274	2.11	2.11	14.04	14.04	8.427	P_KWMTBOMO05078	P_KWMTBOMO05078	P_KWMTBOMO05078	1
275	2.09	2.09	18.44	9.836	4.918	P_KWMTBOMO10310	P_KWMTBOMO10310	P_KWMTBOMO10310	1
276	2.09	2.09	5.263	5.263	1.815	P_KWMTBOMO14936	P_KWMTBOMO14936	P_KWMTBOMO14936	1
277	2.09	2.09	19.42	19.42	11.65	P_KWMTBOMO11742	P_KWMTBOMO11742	P_KWMTBOMO11742	1
278	2.09	2.09	23.53	23.53	14.29	P_KWMTBOMO04674	P_KWMTBOMO04674	P_KWMTBOMO04674	1
279	2.07	2.07	28.92	5.882	5.882	P_KWMTBOMO01273	P_KWMTBOMO01273	P_KWMTBOMO01273	1
280	2.06	2.06	3.641	1.56	1.56	P_KWMTBOMO15101	P_KWMTBOMO15101	P_KWMTBOMO15101	1
281	2.05	2.05	1.528	0.3354	0.3354	P_KWMTBOMO11570	P_KWMTBOMO11570	P_KWMTBOMO11570	1
282	2.04	2.04	7.069	2.069	2.069	P_KWMTBOMO11590	P_KWMTBOMO11590	P_KWMTBOMO11590	1
283	2.04	2.04	12.59	3.8	3.8	P_KWMTBOMO08893	P_KWMTBOMO08893	P_KWMTBOMO08893	1
284	2.04	2.04	16.34	11.39	5.941	P_KWMTBOMO07722	P_KWMTBOMO07722	P_KWMTBOMO07722	1
285	2.02	2.02	15.24	4.573	4.573	P_KWMTBOMO06082	P_KWMTBOMO06082	P_KWMTBOMO06082	1
286	2.02	2.02	7.265	2.35	2.35	P_KWMTBOMO13729	P_KWMTBOMO13729	P_KWMTBOMO13729	1
287	2.02	2.02	13.14	8.571	8.571	P_KWMTBOMO16319	P_KWMTBOMO16319	P_KWMTBOMO16319	1
288	2.02	2.02	34.74	34.74	20	P_KWMTBOMO14478	P_KWMTBOMO14478	P_KWMTBOMO14478	1
289	2.01	2.01	11.38	1.821	1.821	P_KWMTBOMO14240	P_KWMTBOMO14240	P_KWMTBOMO14240	1
290	2.01	2.01	11.17	6.145	2.421	P_KWMTBOMO07323	P_KWMTBOMO07323	P_KWMTBOMO07323	1
291	2.01	2.01	4.259	1.508	1.508	P_KWMTBOMO01821	P_KWMTBOMO01821	P_KWMTBOMO01821	1
292	2.01	2.01	6.593	3.077	3.077	P_KWMTBOMO15781	P_KWMTBOMO15781	P_KWMTBOMO15781	1
293	2.01	2.01	18.48	5.072	5.072	P_KWMTBOMO05975	P_KWMTBOMO05975	P_KWMTBOMO05975	1
294	2.01	2.01	8.696	8.696	5.351	P_KWMTBOMO11061	P_KWMTBOMO11061	P_KWMTBOMO11061	1
295	2.01	2.01	2.013	1.151	1.151	P_KWMTBOMO04806	P_KWMTBOMO04806	P_KWMTBOMO04806	1
296	2	4	4.382	2.39	2.39	P_KWMTBOMO01817	P_KWMTBOMO01817	P_KWMTBOMO01817	2
297	2	2.02	4.415	3.091	3.091	P_KWMTBOMO04737	P_KWMTBOMO04737	P_KWMTBOMO04737	1
298	2	2	8.072	1.682	1.682	P_KWMTBOMO09657	P_KWMTBOMO09657	P_KWMTBOMO09657	1
299	2	2	11.99	1.712	1.712	P_KWMTBOMO09621	P_KWMTBOMO09621	P_KWMTBOMO09621	1
300	2	2	2.454	0.6888	0.6888	P_KWMTBOMO11045	P_KWMTBOMO11045	P_KWMTBOMO11045	1
301	2	2	7.271	2.503	2.503	P_KWMTBOMO10661	P_KWMTBOMO10661	P_KWMTBOMO10661	1
302	2	2	5.486	1.746	1.746	P_KWMTBOMO01072	P_KWMTBOMO01072	P_KWMTBOMO01072	1
303	2	2	6.105	1.099	1.099	P_KWMTBOMO00303	P_KWMTBOMO00303	P_KWMTBOMO00303	1
304	2	2	9.201	3.874	3.874	P_KWMTBOMO16261	P_KWMTBOMO16261	P_KWMTBOMO16261	1
305	2	2	2.539	0.8669	0.8669	P_KWMTBOMO15715	P_KWMTBOMO15715	P_KWMTBOMO15715	1
306	2	2	4.055	1.385	1.385	P_KWMTBOMO14962	P_KWMTBOMO14962	P_KWMTBOMO14962	1
307	2	2	7.29	2.853	2.853	P_KWMTBOMO01438	P_KWMTBOMO01438	P_KWMTBOMO01438	1
308	2	2	7.91	3.578	3.578	P_KWMTBOMO00366	P_KWMTBOMO00366	P_KWMTBOMO00366	1
309	2	2	8.796	4.63	4.63	P_KWMTBOMO16600	P_KWMTBOMO16600	P_KWMTBOMO16600	1
310	2	2	2.22	1.544	1.544	P_KWMTBOMO11517	P_KWMTBOMO11517	P_KWMTBOMO11517	1
311	2	2	3.672	2.376	2.376	P_KWMTBOMO11110	P_KWMTBOMO11110	P_KWMTBOMO11110	1
312	2	2	3.506	2.003	2.003	P_KWMTBOMO10212	P_KWMTBOMO10212	P_KWMTBOMO10212	1
313	2	2	4.613	2.171	2.171	P_KWMTBOMO09811	P_KWMTBOMO09811	P_KWMTBOMO09811	1
314	2	2	6.095	2.709	2.709	P_KWMTBOMO08056	P_KWMTBOMO08056	P_KWMTBOMO08056	1
315	2	2	3.186	2.696	2.696	P_KWMTBOMO07554	P_KWMTBOMO07554	P_KWMTBOMO07554	1
316	2	2	1.743	1.072	1.072	P_KWMTBOMO07214	P_KWMTBOMO07214	P_KWMTBOMO07214	1
317	2	2	9.091	5.628	5.628	P_KWMTBOMO06762	P_KWMTBOMO06762	P_KWMTBOMO06762	1
318	2	2	12.73	6.818	6.818	P_KWMTBOMO06639	P_KWMTBOMO06639	P_KWMTBOMO06639	1
319	2	2	6.07	2.875	2.875	P_KWMTBOMO05299	P_KWMTBOMO05299	P_KWMTBOMO05299	1
320	2	2	5.415	2.876	2.876	P_KWMTBOMO05205	P_KWMTBOMO05205	P_KWMTBOMO05205	1
321	2	2	16.67	5.285	5.285	P_KWMTBOMO04424	P_KWMTBOMO04424	P_KWMTBOMO04424	1
322	2	2	4.038	2.115	2.115	P_KWMTBOMO04057	P_KWMTBOMO04057	P_KWMTBOMO04057	1
324	2	2	8.667	6	6	P_KWMTBOMO02775	P_KWMTBOMO02775	P_KWMTBOMO02775	1
325	2	2	8.353	4.872	4.872	P_KWMTBOMO02223	P_KWMTBOMO02223	P_KWMTBOMO02223	1
326	2	2	4.712	2.88	2.88	P_KWMTBOMO02013	P_KWMTBOMO02013	P_KWMTBOMO02013	1
327	2	2	4.516	2.366	2.366	P_KWMTBOMO00279	P_KWMTBOMO00279	P_KWMTBOMO00279	1
328	2	2	7.692	7.692	7.692	P_KWMTBOMO13859	P_KWMTBOMO13859	P_KWMTBOMO13859	1
329	2	2	4.365	4.365	4.365	P_KWMTBOMO12448	P_KWMTBOMO12448	P_KWMTBOMO12448	1
330	2	2	4.514	4.514	4.514	P_KWMTBOMO11202	P_KWMTBOMO11202	P_KWMTBOMO11202	1
331	2	2	1.964	1.964	1.964	P_KWMTBOMO08707	P_KWMTBOMO08707	P_KWMTBOMO08707	1
332	2	2	5.292	5.292	5.292	P_KWMTBOMO08607	P_KWMTBOMO08607	P_KWMTBOMO08607	1
333	2	2	5.263	5.263	5.263	P_KWMTBOMO08323	P_KWMTBOMO08323	P_KWMTBOMO08323	1
334	2	2	17.39	17.39	17.39	P_KWMTBOMO08193	P_KWMTBOMO08193	P_KWMTBOMO08193	1
335	2	2	9.626	9.626	9.626	P_KWMTBOMO07857	P_KWMTBOMO07857	P_KWMTBOMO07857	1
336	2	2	13.85	13.85	13.85	P_KWMTBOMO06654	P_KWMTBOMO06654	P_KWMTBOMO06654	1
337	2	2	4.396	4.396	4.396	P_KWMTBOMO04789	P_KWMTBOMO04789	P_KWMTBOMO04789	1
338	2	2	6.011	6.011	6.011	P_KWMTBOMO04584	P_KWMTBOMO04584	P_KWMTBOMO04584	1
340	2	2	5.914	5.914	5.914	P_KWMTBOMO02836	P_KWMTBOMO02836	P_KWMTBOMO02836	1
341	2	2	13.89	13.89	13.89	P_KWMTBOMO02542	P_KWMTBOMO02542	P_KWMTBOMO02542	1
342	2	2	7.661	7.661	7.661	P_KWMTBOMO02460	P_KWMTBOMO02460	P_KWMTBOMO02460	1
343	2	2	2.08	2.08	2.08	P_KWMTBOMO02354	P_KWMTBOMO02354	P_KWMTBOMO02354	1
344	2	2	6.024	6.024	6.024	P_KWMTBOMO02185	P_KWMTBOMO02185	P_KWMTBOMO02185	1
346	2	2	3.017	3.017	3.017	P_KWMTBOMO01708	P_KWMTBOMO01708	P_KWMTBOMO01708	1
347	2	2	8.901	8.901	8.901	P_KWMTBOMO01658	P_KWMTBOMO01658	P_KWMTBOMO01658	1
348	2	2	4.18	4.18	4.18	P_KWMTBOMO01312	P_KWMTBOMO01312	P_KWMTBOMO01312	1
349	2	2	6.584	6.584	6.584	P_KWMTBOMO00973	P_KWMTBOMO00973	P_KWMTBOMO00973	1
350	1.96	2	2.767	2.767	2.767	P_KWMTBOMO05699	P_KWMTBOMO05699	P_KWMTBOMO05699	1
351	1.96	2	8.571	8.571	8.571	P_KWMTBOMO03003	P_KWMTBOMO03003	P_KWMTBOMO03003	1
352	1.96	2	6.316	6.316	6.316	P_KWMTBOMO01420	P_KWMTBOMO01420	P_KWMTBOMO01420	1
353	1.92	1.92	5.019	5.019	5.019	P_KWMTBOMO04992	P_KWMTBOMO04992	P_KWMTBOMO04992	1
354	1.83	1.83	9.517	2.635	1.611	P_KWMTBOMO01452	P_KWMTBOMO01452	P_KWMTBOMO01452	1
355	1.82	4.13	17.06	8.411	6.308	P_KWMTBOMO14984	P_KWMTBOMO14984	P_KWMTBOMO14984	2
357	1.8	1.8	4.127	3.81	3.81	P_KWMTBOMO05113	P_KWMTBOMO05113	P_KWMTBOMO05113	1
358	1.77	1.77	7.158	4	4	P_KWMTBOMO01315	P_KWMTBOMO01315	P_KWMTBOMO01315	1
359	1.74	1.74	13.66	13.66	7.65	P_KWMTBOMO01431	P_KWMTBOMO01431	P_KWMTBOMO01431	1
360	1.7	1.7	6.928	3.614	3.614	P_KWMTBOMO07821	P_KWMTBOMO07821	P_KWMTBOMO07821	1
361	1.68	1.68	4.79	2.794	2.794	P_KWMTBOMO15121	P_KWMTBOMO15121	P_KWMTBOMO15121	1
362	1.66	3.92	14.95	14.95	10.28	P_KWMTBOMO13774	P_KWMTBOMO13774	P_KWMTBOMO13774	2
363	1.66	1.66	5.689	1.138	1.138	P_KWMTBOMO05612	P_KWMTBOMO05612	P_KWMTBOMO05612	1
364	1.66	1.66	11.72	11.72	11.72	P_KWMTBOMO00786	P_KWMTBOMO00786	P_KWMTBOMO00786	1
365	1.62	1.62	7.863	2.823	2.823	P_KWMTBOMO13041	P_KWMTBOMO13041	P_KWMTBOMO13041	1
366	1.6	1.6	13.7	13.7	13.7	P_KWMTBOMO10211	P_KWMTBOMO10211	P_KWMTBOMO10211	1
367	1.6	1.6	1.16	1.16	1.16	P_KWMTBOMO08343	P_KWMTBOMO08343	P_KWMTBOMO08343	1
368	1.57	1.57	7.143	7.143	7.143	P_KWMTBOMO11772	P_KWMTBOMO11772	P_KWMTBOMO11772	1
369	1.53	1.53	17.22	17.22	7.778	P_KWMTBOMO06228	P_KWMTBOMO06228	P_KWMTBOMO06228	1
370	1.51	1.51	1.98	1.98	1.98	P_KWMTBOMO00982	P_KWMTBOMO00982	P_KWMTBOMO00982	1
371	1.49	1.49	2.674	0.8913	0.4902	P_KWMTBOMO05810	P_KWMTBOMO05810	P_KWMTBOMO05810	1
372	1.49	1.49	7.326	3.297	3.297	P_KWMTBOMO09641	P_KWMTBOMO09641	P_KWMTBOMO09641	1
373	1.48	3.7	16.27	10.53	10.53	P_KWMTBOMO03027	P_KWMTBOMO03027	P_KWMTBOMO03027	2
374	1.48	1.49	6.641	4.297	2.148	P_KWMTBOMO08040	P_KWMTBOMO08040	P_KWMTBOMO08040	2
375	1.48	1.48	8.621	8.621	8.621	P_KWMTBOMO11771	P_KWMTBOMO11771	P_KWMTBOMO11771	1
376	1.47	1.48	11.16	5.463	3.088	P_KWMTBOMO04330	P_KWMTBOMO04330	P_KWMTBOMO04330	1
377	1.44	1.53	6.925	3.462	2.24	P_KWMTBOMO03002	P_KWMTBOMO03002	P_KWMTBOMO03002	1
378	1.43	1.43	8.612	5.263	5.263	P_KWMTBOMO13723	P_KWMTBOMO13723	P_KWMTBOMO13723	1
379	1.42	1.42	7.342	4.557	2.532	P_KWMTBOMO08310	P_KWMTBOMO08310	P_KWMTBOMO08310	2
380	1.41	1.41	6.318	1.986	1.986	P_KWMTBOMO09838	P_KWMTBOMO09838	P_KWMTBOMO09838	1
382	1.36	1.36	12.34	8.442	8.442	P_KWMTBOMO16524	P_KWMTBOMO16524	P_KWMTBOMO16524	1
384	1.34	1.34	17.16	17.16	8.333	P_KWMTBOMO09631	P_KWMTBOMO09631	P_KWMTBOMO09631	1
385	1.34	1.34	3.743	3.743	3.743	P_KWMTBOMO15712	P_KWMTBOMO15712	P_KWMTBOMO15712	1
386	1.3	1.3	3.036	3.036	3.036	P_KWMTBOMO05993	P_KWMTBOMO05993	P_KWMTBOMO05993	1
387	1.3	1.3	2.994	2.994	2.994	P_KWMTBOMO04966	P_KWMTBOMO04966	P_KWMTBOMO04966	1

## Sheet: P25_M4
N	Unused	Total	%Cov	%Cov(50)	%Cov(95)	Accession	Citable Accession	Name	Peptides(95%)
3	27.84	27.84	12.67	8.946	6.731	P_KWMTBOMO08648	P_KWMTBOMO08648	P_KWMTBOMO08648	13
8	19.9	19.9	19.82	16.44	13.29	P_KWMTBOMO00462	P_KWMTBOMO00462	P_KWMTBOMO00462	9
10	16.33	16.33	9.188	6.65	4.518	P_KWMTBOMO10056	P_KWMTBOMO10056	P_KWMTBOMO10056	9
12	15.22	15.22	39.6	36.24	28.12	P_KWMTBOMO07374	P_KWMTBOMO07374	P_KWMTBOMO07374	10
13	15.13	15.13	17.31	15.12	12.27	P_KWMTBOMO15159	P_KWMTBOMO15159	P_KWMTBOMO15159	7
16	14.21	14.21	16	13.98	10.19	P_KWMTBOMO11731	P_KWMTBOMO11731	P_KWMTBOMO11731	8
17	14.03	14.03	21.4	13.88	13.88	P_KWMTBOMO04502	P_KWMTBOMO04502	P_KWMTBOMO04502	7
19	13.23	13.23	10.2	4.966	3.07	P_KWMTBOMO06632	P_KWMTBOMO06632	P_KWMTBOMO06632	6
20	13.13	20.06	31.3	27.63	17.1	P_KWMTBOMO08642	P_KWMTBOMO08642	P_KWMTBOMO08642	12
21	12.35	12.35	21.52	21.36	18.2	P_KWMTBOMO08044	P_KWMTBOMO08044	P_KWMTBOMO08044	6
24	11.94	11.94	11.07	7.239	7.239	P_KWMTBOMO01927	P_KWMTBOMO01927	P_KWMTBOMO01927	8
25	11.4	11.4	13.11	10.93	8.561	P_KWMTBOMO00927	P_KWMTBOMO00927	P_KWMTBOMO00927	5
27	11.02	11.02	12.92	6.074	6.074	P_KWMTBOMO04505	P_KWMTBOMO04505	P_KWMTBOMO04505	6
29	10.89	10.89	28.85	28.85	25.69	P_KWMTBOMO12497	P_KWMTBOMO12497	P_KWMTBOMO12497	7
31	9.97	9.97	17.07	15.4	13.91	P_KWMTBOMO01075	P_KWMTBOMO01075	P_KWMTBOMO01075	5
32	9.94	9.94	29.83	24.43	18.47	P_KWMTBOMO05675	P_KWMTBOMO05675	P_KWMTBOMO05675	8
33	9.88	9.88	20.34	17.89	10.73	P_KWMTBOMO09808	P_KWMTBOMO09808	P_KWMTBOMO09808	5
34	9.76	9.76	9.556	8.687	6.66	P_KWMTBOMO11517	P_KWMTBOMO11517	P_KWMTBOMO11517	5
35	9.62	9.62	11.18	11.18	11.18	P_KWMTBOMO05564	P_KWMTBOMO05564	P_KWMTBOMO05564	5
37	9.39	9.39	24.71	18.63	16.35	P_KWMTBOMO13455	P_KWMTBOMO13455	P_KWMTBOMO13455	5
38	9.26	9.26	20.82	15.24	15.24	P_KWMTBOMO11985	P_KWMTBOMO11985	P_KWMTBOMO11985	5
41	8.76	8.76	11.44	7.059	5.241	P_KWMTBOMO14420	P_KWMTBOMO14420	P_KWMTBOMO14420	4
43	8.39	8.39	8.551	8.551	8.551	P_KWMTBOMO14549	P_KWMTBOMO14549	P_KWMTBOMO14549	5
45	8.06	8.06	18.77	15.82	15.82	P_KWMTBOMO06231	P_KWMTBOMO06231	P_KWMTBOMO06231	5
46	8.03	8.03	7.397	3.263	3.263	P_KWMTBOMO14858	P_KWMTBOMO14858	P_KWMTBOMO14858	4
47	7.81	7.81	17.01	14.37	14.37	P_KWMTBOMO13997	P_KWMTBOMO13997	P_KWMTBOMO13997	5
49	7.49	7.49	11.09	11.09	7.556	P_KWMTBOMO03748	P_KWMTBOMO03748	P_KWMTBOMO03748	4
52	6.83	6.83	10.7	9.225	9.225	P_KWMTBOMO14887	P_KWMTBOMO14887	P_KWMTBOMO14887	5
55	6.73	6.73	23.72	19.87	19.87	P_KWMTBOMO16040	P_KWMTBOMO16040	P_KWMTBOMO16040	7
56	6.41	6.41	9.38	9.38	5.772	P_KWMTBOMO13567	P_KWMTBOMO13567	P_KWMTBOMO13567	3
57	6.39	6.39	6.03	4.824	4.02	P_KWMTBOMO10780	P_KWMTBOMO10780	P_KWMTBOMO10780	3
58	6.32	6.32	10.53	9.076	6.321	P_KWMTBOMO11096	P_KWMTBOMO11096	P_KWMTBOMO11096	4
59	6.19	6.19	11.21	6.821	4.872	P_KWMTBOMO00638	P_KWMTBOMO00638	P_KWMTBOMO00638	3
60	6.09	6.09	6.931	4.477	1.291	P_KWMTBOMO11045	P_KWMTBOMO11045	P_KWMTBOMO11045	2
61	5.98	5.98	12.89	12.89	8.947	P_KWMTBOMO01720	P_KWMTBOMO01720	P_KWMTBOMO01720	4
63	5.95	5.95	13.31	9.274	9.274	P_KWMTBOMO12037	P_KWMTBOMO12037	P_KWMTBOMO12037	3
64	5.9	5.9	27.32	20.77	16.94	P_KWMTBOMO06480	P_KWMTBOMO06480	P_KWMTBOMO06480	4
65	5.79	5.79	21.79	18.59	12.18	P_KWMTBOMO16357	P_KWMTBOMO16357	P_KWMTBOMO16357	3
66	5.74	5.74	11.72	8.696	8.696	P_KWMTBOMO01606	P_KWMTBOMO01606	P_KWMTBOMO01606	4
67	5.66	5.66	2.998	1.79	1.79	P_KWMTBOMO05728	P_KWMTBOMO05728	P_KWMTBOMO05728	3
69	5.56	5.56	9.428	7.573	7.573	P_KWMTBOMO13370	P_KWMTBOMO13370	P_KWMTBOMO13370	3
70	5.55	5.55	40.85	30.99	15.49	P_KWMTBOMO07373	P_KWMTBOMO07373	P_KWMTBOMO07373	5
71	5.45	5.45	8.7	6.9	4.3	P_KWMTBOMO13293	P_KWMTBOMO13293	P_KWMTBOMO13293	3
72	5.29	5.29	9.562	4.648	4.648	P_KWMTBOMO01817	P_KWMTBOMO01817	P_KWMTBOMO01817	3
73	5.28	5.28	6.102	3.136	1.61	P_KWMTBOMO09542	P_KWMTBOMO09542	P_KWMTBOMO09542	2
74	5.14	5.14	9.91	5.586	5.586	P_KWMTBOMO03626	P_KWMTBOMO03626	P_KWMTBOMO03626	3
75	5.11	5.11	3.02	3.02	3.02	P_KWMTBOMO00427	P_KWMTBOMO00427	P_KWMTBOMO00427	3
76	4.88	4.88	17.69	14.62	12.31	P_KWMTBOMO13405	P_KWMTBOMO13405	P_KWMTBOMO13405	2
77	4.82	5.75	7.901	5.062	2.716	P_KWMTBOMO12844	P_KWMTBOMO12844	P_KWMTBOMO12844	2
78	4.82	4.82	6.077	6.077	4.972	P_KWMTBOMO15359	P_KWMTBOMO15359	P_KWMTBOMO15359	3
79	4.75	4.75	9.783	5.28	4.037	P_KWMTBOMO00687	P_KWMTBOMO00687	P_KWMTBOMO00687	2
82	4.59	4.59	24.2	17.35	9.589	P_KWMTBOMO05979	P_KWMTBOMO05979	P_KWMTBOMO05979	3
84	4.56	4.56	13.65	12	10.12	P_KWMTBOMO09415	P_KWMTBOMO09415	P_KWMTBOMO09415	7
85	4.5	4.5	27.47	15.38	7.326	P_KWMTBOMO09442	P_KWMTBOMO09442	P_KWMTBOMO09442	2
86	4.45	4.45	8.63	7.505	4.128	P_KWMTBOMO06770	P_KWMTBOMO06770	P_KWMTBOMO06770	2
87	4.45	4.45	10.95	9.286	6.905	P_KWMTBOMO02081	P_KWMTBOMO02081	P_KWMTBOMO02081	2
88	4.43	4.43	11.31	7.789	5.779	P_KWMTBOMO12166	P_KWMTBOMO12166	P_KWMTBOMO12166	2
89	4.32	4.32	5.457	3.956	3.956	P_KWMTBOMO03177	P_KWMTBOMO03177	P_KWMTBOMO03177	3
90	4.3	4.3	9.385	4.099	2.697	P_KWMTBOMO04610	P_KWMTBOMO04610	P_KWMTBOMO04610	2
91	4.29	4.29	10.44	5.882	2.941	P_KWMTBOMO08652	P_KWMTBOMO08652	P_KWMTBOMO08652	3
92	4.24	4.24	45.71	25.99	8.892	P_KWMTBOMO12607	P_KWMTBOMO12607	P_KWMTBOMO12607	2
93	4.23	4.23	7.163	4.394	2.674	P_KWMTBOMO09055	P_KWMTBOMO09055	P_KWMTBOMO09055	2
94	4.23	4.23	11.68	8.286	8.286	P_KWMTBOMO00366	P_KWMTBOMO00366	P_KWMTBOMO00366	3
95	4.12	4.12	4.128	1.223	1.223	P_KWMTBOMO15617	P_KWMTBOMO15617	P_KWMTBOMO15617	2
96	4.1	4.1	27.97	14.94	8.429	P_KWMTBOMO07688	P_KWMTBOMO07688	P_KWMTBOMO07688	2
97	4.08	4.08	29.34	19.31	19.31	P_KWMTBOMO00339	P_KWMTBOMO00339	P_KWMTBOMO00339	4
98	4.07	4.07	7.66	6.685	6.685	P_KWMTBOMO10358	P_KWMTBOMO10358	P_KWMTBOMO10358	3
99	4.07	4.07	5.987	4.531	4.531	P_KWMTBOMO03630	P_KWMTBOMO03630	P_KWMTBOMO03630	2
100	4.05	4.05	23	15.02	15.02	P_KWMTBOMO05566	P_KWMTBOMO05566	P_KWMTBOMO05566	3
101	4.04	4.04	17.53	8.442	8.442	P_KWMTBOMO16524	P_KWMTBOMO16524	P_KWMTBOMO16524	2
102	4.04	4.04	12.74	7.962	7.962	P_KWMTBOMO15758	P_KWMTBOMO15758	P_KWMTBOMO15758	3
104	4	4	27.07	15.47	15.47	P_KWMTBOMO16637	P_KWMTBOMO16637	P_KWMTBOMO16637	2
105	4	4	20	8.75	8.75	P_KWMTBOMO07772	P_KWMTBOMO07772	P_KWMTBOMO07772	2
106	4	4	8.238	5.492	5.492	P_KWMTBOMO15123	P_KWMTBOMO15123	P_KWMTBOMO15123	2
108	4	4	14.49	10.87	10.87	P_KWMTBOMO06621	P_KWMTBOMO06621	P_KWMTBOMO06621	2
109	4	4	7.143	4.762	4.762	P_KWMTBOMO02748	P_KWMTBOMO02748	P_KWMTBOMO02748	3
110	4	4	9.477	9.477	9.477	P_KWMTBOMO10248	P_KWMTBOMO10248	P_KWMTBOMO10248	2
111	4	4	7.692	7.692	7.692	P_KWMTBOMO03860	P_KWMTBOMO03860	P_KWMTBOMO03860	2
112	3.92	3.92	11.54	4.487	4.487	P_KWMTBOMO02470	P_KWMTBOMO02470	P_KWMTBOMO02470	2
113	3.92	3.92	3.196	3.196	3.196	P_KWMTBOMO09621	P_KWMTBOMO09621	P_KWMTBOMO09621	2
114	3.89	4.44	8.588	6.298	5.153	P_KWMTBOMO12560	P_KWMTBOMO12560	P_KWMTBOMO12560	2
115	3.8	3.8	21.68	13.29	13.29	P_KWMTBOMO08666	P_KWMTBOMO08666	P_KWMTBOMO08666	3
117	3.74	3.74	10.63	6.54	6.54	P_KWMTBOMO04370	P_KWMTBOMO04370	P_KWMTBOMO04370	2
118	3.72	3.72	10.56	6.211	2.981	P_KWMTBOMO11666	P_KWMTBOMO11666	P_KWMTBOMO11666	2
119	3.67	3.67	3.552	2.684	1.736	P_KWMTBOMO03067	P_KWMTBOMO03067	P_KWMTBOMO03067	2
120	3.64	3.64	4.264	4.264	4.264	P_KWMTBOMO14752	P_KWMTBOMO14752	P_KWMTBOMO14752	2
121	3.59	3.59	6.295	1.614	1.614	P_KWMTBOMO05687	P_KWMTBOMO05687	P_KWMTBOMO05687	2
122	3.56	3.56	39.22	27.45	27.45	P_KWMTBOMO13569	P_KWMTBOMO13569	P_KWMTBOMO13569	2
123	3.55	3.56	3.54	3.54	3.413	P_KWMTBOMO05612	P_KWMTBOMO05612	P_KWMTBOMO05612	2
124	3.54	3.54	6.513	6.513	4.412	P_KWMTBOMO12895	P_KWMTBOMO12895	P_KWMTBOMO12895	3
126	3.51	3.51	12.32	12.32	12.32	P_KWMTBOMO00794	P_KWMTBOMO00794	P_KWMTBOMO00794	3
127	3.49	3.49	39.5	19.33	19.33	P_KWMTBOMO15114	P_KWMTBOMO15114	P_KWMTBOMO15114	2
128	3.47	3.47	4.491	2.395	2.395	P_KWMTBOMO05541	P_KWMTBOMO05541	P_KWMTBOMO05541	2
129	3.47	3.47	9.726	9.726	6.687	P_KWMTBOMO08776	P_KWMTBOMO08776	P_KWMTBOMO08776	2
130	3.39	3.39	26.8	12.89	9.278	P_KWMTBOMO11255	P_KWMTBOMO11255	P_KWMTBOMO11255	2
131	3.36	3.36	13.95	6.147	6.147	P_KWMTBOMO11083	P_KWMTBOMO11083	P_KWMTBOMO11083	2
132	3.36	3.36	2.734	2.734	2.734	P_KWMTBOMO10493	P_KWMTBOMO10493	P_KWMTBOMO10493	2
133	3.27	3.27	38.85	20.14	14.39	P_KWMTBOMO08399	P_KWMTBOMO08399	P_KWMTBOMO08399	2
134	3.26	3.27	12.21	12.21	12.21	P_KWMTBOMO03550	P_KWMTBOMO03550	P_KWMTBOMO03550	2
135	3.26	3.26	8.195	3.527	2.386	P_KWMTBOMO05741	P_KWMTBOMO05741	P_KWMTBOMO05741	2
136	3.22	3.22	9.812	4.593	4.593	P_KWMTBOMO08956	P_KWMTBOMO08956	P_KWMTBOMO08956	3
137	3.21	3.21	21.65	21.65	21.65	P_KWMTBOMO01918	P_KWMTBOMO01918	P_KWMTBOMO01918	2
138	3.18	3.18	8.168	4.455	4.455	P_KWMTBOMO07331	P_KWMTBOMO07331	P_KWMTBOMO07331	2
139	3.13	3.16	8.256	3.372	2.209	P_KWMTBOMO15583	P_KWMTBOMO15583	P_KWMTBOMO15583	2
140	3.12	3.12	7.951	7.951	7.951	P_KWMTBOMO00497	P_KWMTBOMO00497	P_KWMTBOMO00497	2
141	3.06	3.06	5.006	3.576	3.576	P_KWMTBOMO10661	P_KWMTBOMO10661	P_KWMTBOMO10661	2
142	3.04	3.04	6.921	3.222	3.222	P_KWMTBOMO08213	P_KWMTBOMO08213	P_KWMTBOMO08213	2
143	3.01	3.01	10.68	7.715	3.858	P_KWMTBOMO10376	P_KWMTBOMO10376	P_KWMTBOMO10376	1
144	2.98	2.98	4.775	3.23	3.23	P_KWMTBOMO13226	P_KWMTBOMO13226	P_KWMTBOMO13226	2
146	2.95	2.95	9.603	9.603	9.603	P_KWMTBOMO12389	P_KWMTBOMO12389	P_KWMTBOMO12389	2
147	2.93	2.93	18.99	12.03	6.013	P_KWMTBOMO09300	P_KWMTBOMO09300	P_KWMTBOMO09300	1
148	2.9	2.9	4.264	2.452	2.452	P_KWMTBOMO12667	P_KWMTBOMO12667	P_KWMTBOMO12667	2
149	2.9	2.9	19.5	12.58	12.58	P_KWMTBOMO08100	P_KWMTBOMO08100	P_KWMTBOMO08100	2
150	2.77	2.77	16.08	4.728	1.891	P_KWMTBOMO00375	P_KWMTBOMO00375	P_KWMTBOMO00375	1
151	2.76	2.76	25.67	8	8	P_KWMTBOMO14732	P_KWMTBOMO14732	P_KWMTBOMO14732	2
153	2.7	2.7	7.878	5.466	2.251	P_KWMTBOMO02432	P_KWMTBOMO02432	P_KWMTBOMO02432	1
154	2.68	2.68	14.35	14.35	5.093	P_KWMTBOMO14417	P_KWMTBOMO14417	P_KWMTBOMO14417	1
155	2.68	2.68	11.04	11.04	5.351	P_KWMTBOMO11061	P_KWMTBOMO11061	P_KWMTBOMO11061	2
156	2.66	2.66	15.82	15.82	8.228	P_KWMTBOMO14479	P_KWMTBOMO14479	P_KWMTBOMO14479	1
157	2.61	2.68	24.65	6.221	2.535	P_KWMTBOMO06229	P_KWMTBOMO06229	P_KWMTBOMO06229	1
158	2.58	2.58	31.34	20.9	5.97	P_KWMTBOMO04742	P_KWMTBOMO04742	P_KWMTBOMO04742	1
160	2.55	2.55	9.366	6.042	6.042	P_KWMTBOMO07506	P_KWMTBOMO07506	P_KWMTBOMO07506	4
161	2.54	2.54	29.8	24.5	11.92	P_KWMTBOMO08440	P_KWMTBOMO08440	P_KWMTBOMO08440	2
162	2.48	2.48	5.634	5.634	3.052	P_KWMTBOMO00437	P_KWMTBOMO00437	P_KWMTBOMO00437	1
163	2.46	2.46	27.15	14.57	14.57	P_KWMTBOMO13960	P_KWMTBOMO13960	P_KWMTBOMO13960	2
164	2.4	2.4	3.643	3.643	2.186	P_KWMTBOMO10208	P_KWMTBOMO10208	P_KWMTBOMO10208	1
165	2.37	2.37	13.73	9.804	5.882	P_KWMTBOMO01273	P_KWMTBOMO01273	P_KWMTBOMO01273	1
166	2.34	2.34	12.8	7.012	4.573	P_KWMTBOMO06082	P_KWMTBOMO06082	P_KWMTBOMO06082	1
167	2.34	2.34	1.61	1.61	0.8669	P_KWMTBOMO15715	P_KWMTBOMO15715	P_KWMTBOMO15715	1
168	2.32	2.32	14.84	8.6	3.204	P_KWMTBOMO00834	P_KWMTBOMO00834	P_KWMTBOMO00834	2
169	2.23	2.23	12.09	4.186	2.791	P_KWMTBOMO02061	P_KWMTBOMO02061	P_KWMTBOMO02061	1
170	2.18	2.18	3.743	3.743	2.273	P_KWMTBOMO16130	P_KWMTBOMO16130	P_KWMTBOMO16130	1
171	2.15	2.15	20.93	13.18	6.977	P_KWMTBOMO05723	P_KWMTBOMO05723	P_KWMTBOMO05723	2
172	2.13	2.13	14.31	4.331	2.448	P_KWMTBOMO02994	P_KWMTBOMO02994	P_KWMTBOMO02994	1
174	2.12	2.12	7.493	3.678	2.18	P_KWMTBOMO03430	P_KWMTBOMO03430	P_KWMTBOMO03430	1
176	2.1	2.1	16.18	4.412	4.412	P_KWMTBOMO03314	P_KWMTBOMO03314	P_KWMTBOMO03314	1
177	2.1	2.1	14.41	6.757	6.757	P_KWMTBOMO01424	P_KWMTBOMO01424	P_KWMTBOMO01424	1
178	2.08	2.08	4.228	4.228	1.903	P_KWMTBOMO12205	P_KWMTBOMO12205	P_KWMTBOMO12205	1
179	2.08	2.08	14.63	9.146	9.146	P_KWMTBOMO11678	P_KWMTBOMO11678	P_KWMTBOMO11678	1
180	2.06	2.06	13.37	5.446	5.446	P_KWMTBOMO15361	P_KWMTBOMO15361	P_KWMTBOMO15361	1
181	2.05	2.05	5.921	3.947	1.809	P_KWMTBOMO06787	P_KWMTBOMO06787	P_KWMTBOMO06787	1
182	2.04	2.04	1.904	0.6544	0.6544	P_KWMTBOMO09747	P_KWMTBOMO09747	P_KWMTBOMO09747	2
183	2.03	2.03	5.316	2.532	2.532	P_KWMTBOMO08310	P_KWMTBOMO08310	P_KWMTBOMO08310	1
184	2.02	2.02	2	0.3209	0.3209	P_KWMTBOMO12602	P_KWMTBOMO12602	P_KWMTBOMO12602	1
185	2.02	2.02	8.007	4.283	2.421	P_KWMTBOMO07323	P_KWMTBOMO07323	P_KWMTBOMO07323	1
186	2.02	2.02	10.57	6.415	6.415	P_KWMTBOMO11780	P_KWMTBOMO11780	P_KWMTBOMO11780	1
188	2.01	2.01	25.96	12.5	12.5	P_KWMTBOMO06974	P_KWMTBOMO06974	P_KWMTBOMO06974	1
190	2	4	7.71	4.907	4.907	P_KWMTBOMO14984	P_KWMTBOMO14984	P_KWMTBOMO14984	2
191	2	2	6.203	2.481	2.481	P_KWMTBOMO11098	P_KWMTBOMO11098	P_KWMTBOMO11098	1
192	2	2	5.273	1.151	1.151	P_KWMTBOMO04806	P_KWMTBOMO04806	P_KWMTBOMO04806	1
193	2	2	6.542	2.453	2.453	P_KWMTBOMO03016	P_KWMTBOMO03016	P_KWMTBOMO03016	1
194	2	2	10.14	3.509	3.509	P_KWMTBOMO00881	P_KWMTBOMO00881	P_KWMTBOMO00881	1
195	2	2	8.467	2.517	2.517	P_KWMTBOMO14530	P_KWMTBOMO14530	P_KWMTBOMO14530	1
196	2	2	5.172	2.069	2.069	P_KWMTBOMO11590	P_KWMTBOMO11590	P_KWMTBOMO11590	1
197	2	2	2.56	1.28	1.28	P_KWMTBOMO08509	P_KWMTBOMO08509	P_KWMTBOMO08509	1
198	2	2	3.764	1.322	1.322	P_KWMTBOMO08404	P_KWMTBOMO08404	P_KWMTBOMO08404	1
199	2	2	4.116	1.891	1.891	P_KWMTBOMO07274	P_KWMTBOMO07274	P_KWMTBOMO07274	1
200	2	2	4.739	1.738	1.738	P_KWMTBOMO06803	P_KWMTBOMO06803	P_KWMTBOMO06803	1
201	2	2	2.874	1.149	1.149	P_KWMTBOMO06766	P_KWMTBOMO06766	P_KWMTBOMO06766	1
202	2	2	2.295	0.8032	0.8032	P_KWMTBOMO06334	P_KWMTBOMO06334	P_KWMTBOMO06334	1
203	2	2	2.32	1.198	1.198	P_KWMTBOMO05688	P_KWMTBOMO05688	P_KWMTBOMO05688	1
204	2	2	5.71	2.343	2.343	P_KWMTBOMO01452	P_KWMTBOMO01452	P_KWMTBOMO01452	1
205	2	2	1.767	0.8346	0.8346	P_KWMTBOMO00574	P_KWMTBOMO00574	P_KWMTBOMO00574	1
206	2	2	6.534	3.977	3.977	P_KWMTBOMO16530	P_KWMTBOMO16530	P_KWMTBOMO16530	1
207	2	2	8.718	5.897	5.897	P_KWMTBOMO16309	P_KWMTBOMO16309	P_KWMTBOMO16309	1
208	2	2	8.889	4.815	4.815	P_KWMTBOMO15867	P_KWMTBOMO15867	P_KWMTBOMO15867	1
209	2	2	7.843	4.902	4.902	P_KWMTBOMO14346	P_KWMTBOMO14346	P_KWMTBOMO14346	1
210	2	2	6.494	3.377	3.377	P_KWMTBOMO14041	P_KWMTBOMO14041	P_KWMTBOMO14041	1
211	2	2	2.84	1.567	1.567	P_KWMTBOMO13235	P_KWMTBOMO13235	P_KWMTBOMO13235	1
212	2	2	8.076	4.276	4.276	P_KWMTBOMO08893	P_KWMTBOMO08893	P_KWMTBOMO08893	1
213	2	2	17.39	17.39	17.39	P_KWMTBOMO08193	P_KWMTBOMO08193	P_KWMTBOMO08193	1
214	2	2	8.696	6.763	6.763	P_KWMTBOMO08106	P_KWMTBOMO08106	P_KWMTBOMO08106	1
215	2	2	4.78	3.25	3.25	P_KWMTBOMO08041	P_KWMTBOMO08041	P_KWMTBOMO08041	1
216	2	2	3.911	2.347	2.347	P_KWMTBOMO07380	P_KWMTBOMO07380	P_KWMTBOMO07380	1
217	2	2	4.57	2.377	2.377	P_KWMTBOMO07294	P_KWMTBOMO07294	P_KWMTBOMO07294	1
218	2	2	4.508	2.671	2.671	P_KWMTBOMO05673	P_KWMTBOMO05673	P_KWMTBOMO05673	1
219	2	2	11.47	3.741	3.741	P_KWMTBOMO05056	P_KWMTBOMO05056	P_KWMTBOMO05056	1
220	2	2	5.081	3.695	3.695	P_KWMTBOMO04605	P_KWMTBOMO04605	P_KWMTBOMO04605	1
221	2	2	6.88	3.686	3.686	P_KWMTBOMO02835	P_KWMTBOMO02835	P_KWMTBOMO02835	1
222	2	2	12.1	7.661	7.661	P_KWMTBOMO02460	P_KWMTBOMO02460	P_KWMTBOMO02460	2
223	2	2	2.121	1.097	1.097	P_KWMTBOMO02211	P_KWMTBOMO02211	P_KWMTBOMO02211	1
224	2	2	6.25	3.233	3.233	P_KWMTBOMO01708	P_KWMTBOMO01708	P_KWMTBOMO01708	1
225	2	2	4.324	4.324	4.324	P_KWMTBOMO15584	P_KWMTBOMO15584	P_KWMTBOMO15584	1
226	2	2	0.892	0.892	0.892	P_KWMTBOMO15314	P_KWMTBOMO15314	P_KWMTBOMO15314	1
228	2	2	1.818	1.818	1.818	P_KWMTBOMO15060	P_KWMTBOMO15060	P_KWMTBOMO15060	1
229	2	2	2.935	2.935	2.935	P_KWMTBOMO14804	P_KWMTBOMO14804	P_KWMTBOMO14804	1
230	2	2	1.461	1.461	1.461	P_KWMTBOMO14568	P_KWMTBOMO14568	P_KWMTBOMO14568	1
231	2	2	12.16	12.16	12.16	P_KWMTBOMO14440	P_KWMTBOMO14440	P_KWMTBOMO14440	1
232	2	2	6.19	6.19	6.19	P_KWMTBOMO13641	P_KWMTBOMO13641	P_KWMTBOMO13641	1
233	2	2	1.912	1.912	1.912	P_KWMTBOMO12264	P_KWMTBOMO12264	P_KWMTBOMO12264	1
234	2	2	2.765	2.765	2.765	P_KWMTBOMO12165	P_KWMTBOMO12165	P_KWMTBOMO12165	1
235	2	2	6.542	6.542	6.542	P_KWMTBOMO11448	P_KWMTBOMO11448	P_KWMTBOMO11448	1
236	2	2	4.514	4.514	4.514	P_KWMTBOMO11202	P_KWMTBOMO11202	P_KWMTBOMO11202	1
237	2	2	3.218	3.218	3.218	P_KWMTBOMO09054	P_KWMTBOMO09054	P_KWMTBOMO09054	1
238	2	2	6.623	6.623	6.623	P_KWMTBOMO09000	P_KWMTBOMO09000	P_KWMTBOMO09000	1
239	2	2	5.532	5.532	5.532	P_KWMTBOMO08862	P_KWMTBOMO08862	P_KWMTBOMO08862	1
240	2	2	11.11	11.11	11.11	P_KWMTBOMO08820	P_KWMTBOMO08820	P_KWMTBOMO08820	1
241	2	2	5.292	5.292	5.292	P_KWMTBOMO08607	P_KWMTBOMO08607	P_KWMTBOMO08607	1
242	2	2	3.937	3.937	3.937	P_KWMTBOMO08535	P_KWMTBOMO08535	P_KWMTBOMO08535	1
243	2	2	5.263	5.263	5.263	P_KWMTBOMO08323	P_KWMTBOMO08323	P_KWMTBOMO08323	1
244	2	2	2.494	2.494	2.494	P_KWMTBOMO08194	P_KWMTBOMO08194	P_KWMTBOMO08194	1
245	2	2	3.886	3.886	3.886	P_KWMTBOMO07780	P_KWMTBOMO07780	P_KWMTBOMO07780	1
246	2	2	0.9298	0.9298	0.9298	P_KWMTBOMO07589	P_KWMTBOMO07589	P_KWMTBOMO07589	1
247	2	2	2.111	2.111	2.111	P_KWMTBOMO07076	P_KWMTBOMO07076	P_KWMTBOMO07076	1
248	2	2	2.484	2.484	2.484	P_KWMTBOMO06731	P_KWMTBOMO06731	P_KWMTBOMO06731	1
249	2	2	5.072	5.072	5.072	P_KWMTBOMO05975	P_KWMTBOMO05975	P_KWMTBOMO05975	1
250	2	2	2.369	2.369	2.369	P_KWMTBOMO05205	P_KWMTBOMO05205	P_KWMTBOMO05205	1
251	2	2	7.333	7.333	7.333	P_KWMTBOMO04504	P_KWMTBOMO04504	P_KWMTBOMO04504	1
252	2	2	4.527	4.527	4.527	P_KWMTBOMO04168	P_KWMTBOMO04168	P_KWMTBOMO04168	1
253	2	2	6.977	6.977	6.977	P_KWMTBOMO03173	P_KWMTBOMO03173	P_KWMTBOMO03173	1
254	2	2	3.714	3.714	3.714	P_KWMTBOMO03146	P_KWMTBOMO03146	P_KWMTBOMO03146	1
255	2	2	11.11	11.11	11.11	P_KWMTBOMO02431	P_KWMTBOMO02431	P_KWMTBOMO02431	2
256	2	2	6.024	6.024	6.024	P_KWMTBOMO02185	P_KWMTBOMO02185	P_KWMTBOMO02185	1
257	2	2	7.895	7.895	7.895	P_KWMTBOMO02059	P_KWMTBOMO02059	P_KWMTBOMO02059	1
258	2	2	1.746	1.746	1.746	P_KWMTBOMO01072	P_KWMTBOMO01072	P_KWMTBOMO01072	2
259	2	2	11.72	11.72	11.72	P_KWMTBOMO00786	P_KWMTBOMO00786	P_KWMTBOMO00786	1
260	1.92	2	4.444	4.444	4.444	P_KWMTBOMO08201	P_KWMTBOMO08201	P_KWMTBOMO08201	1
261	1.89	1.89	17.11	9.626	9.626	P_KWMTBOMO07857	P_KWMTBOMO07857	P_KWMTBOMO07857	1
262	1.87	1.87	11.49	6.757	6.757	P_KWMTBOMO07930	P_KWMTBOMO07930	P_KWMTBOMO07930	1
263	1.85	1.85	3.704	3.704	2.407	P_KWMTBOMO12659	P_KWMTBOMO12659	P_KWMTBOMO12659	1
264	1.85	1.85	8.257	4.893	4.893	P_KWMTBOMO06056	P_KWMTBOMO06056	P_KWMTBOMO06056	1
265	1.82	1.82	6.341	6.341	2.174	P_KWMTBOMO14483	P_KWMTBOMO14483	P_KWMTBOMO14483	1
266	1.8	1.8	1.989	0.4232	0.4232	P_KWMTBOMO05013	P_KWMTBOMO05013	P_KWMTBOMO05013	1
267	1.77	1.77	3.221	1.273	1.273	P_KWMTBOMO14080	P_KWMTBOMO14080	P_KWMTBOMO14080	1
268	1.74	1.74	4.938	3.086	3.086	P_KWMTBOMO09385	P_KWMTBOMO09385	P_KWMTBOMO09385	1
269	1.72	1.74	6.818	6.818	6.818	P_KWMTBOMO06639	P_KWMTBOMO06639	P_KWMTBOMO06639	1
270	1.69	1.69	25	16.43	5.714	P_KWMTBOMO00838	P_KWMTBOMO00838	P_KWMTBOMO00838	1
271	1.68	1.68	3.647	3.647	1.403	P_KWMTBOMO11336	P_KWMTBOMO11336	P_KWMTBOMO11336	1
272	1.66	1.66	7.419	3.871	3.871	P_KWMTBOMO13369	P_KWMTBOMO13369	P_KWMTBOMO13369	1
273	1.63	1.63	5.206	3.753	2.058	P_KWMTBOMO11160	P_KWMTBOMO11160	P_KWMTBOMO11160	1
274	1.62	1.62	7.11	4.128	2.523	P_KWMTBOMO05987	P_KWMTBOMO05987	P_KWMTBOMO05987	1
275	1.62	1.62	3.027	0.9461	0.9461	P_KWMTBOMO01790	P_KWMTBOMO01790	P_KWMTBOMO01790	1
276	1.61	1.61	13.07	5.505	2.523	P_KWMTBOMO09591	P_KWMTBOMO09591	P_KWMTBOMO09591	1
277	1.6	1.6	3.125	3.125	3.125	P_KWMTBOMO08022	P_KWMTBOMO08022	P_KWMTBOMO08022	1
278	1.57	3.45	4.287	3.36	3.36	P_KWMTBOMO14157	P_KWMTBOMO14157	P_KWMTBOMO14157	2
279	1.56	2.96	58.04	41.96	41.96	P_KWMTBOMO09230	P_KWMTBOMO09230	P_KWMTBOMO09230	3
280	1.54	1.54	6.959	1.713	1.713	P_KWMTBOMO06603	P_KWMTBOMO06603	P_KWMTBOMO06603	1
281	1.51	1.51	6.332	3.958	3.958	P_KWMTBOMO04413	P_KWMTBOMO04413	P_KWMTBOMO04413	1
282	1.46	1.46	4.911	3.274	1.488	P_KWMTBOMO08865	P_KWMTBOMO08865	P_KWMTBOMO08865	1
283	1.46	1.46	2.012	2.012	2.012	P_KWMTBOMO02096	P_KWMTBOMO02096	P_KWMTBOMO02096	1
284	1.43	1.43	4.615	1.41	1.41	P_KWMTBOMO07874	P_KWMTBOMO07874	P_KWMTBOMO07874	1
285	1.43	1.43	6.338	2.817	2.817	P_KWMTBOMO04769	P_KWMTBOMO04769	P_KWMTBOMO04769	1
286	1.43	1.43	6.265	2.552	2.552	P_KWMTBOMO02223	P_KWMTBOMO02223	P_KWMTBOMO02223	1
288	1.41	1.41	6.202	3.359	3.359	P_KWMTBOMO11394	P_KWMTBOMO11394	P_KWMTBOMO11394	1
289	1.36	1.36	10.58	3.621	3.621	P_KWMTBOMO02894	P_KWMTBOMO02894	P_KWMTBOMO02894	1
290	1.35	1.35	3.769	0.3168	0.3168	P_KWMTBOMO11519	P_KWMTBOMO11519	P_KWMTBOMO11519	1
291	1.3	1.3	12.63	5.263	5.263	P_KWMTBOMO12018	P_KWMTBOMO12018	P_KWMTBOMO12018	1

## Sheet: P25_L5D5
N	Unused	Total	%Cov	%Cov(50)	%Cov(95)	Accession	Citable Accession	Name	Peptides(95%)
1	51.46	51.46	38.88	35.37	31.54	P_KWMTBOMO01927	P_KWMTBOMO01927	P_KWMTBOMO01927	35
3	43.93	43.93	31.21	29.16	25.7	P_KWMTBOMO09597	P_KWMTBOMO09597	P_KWMTBOMO09597	27
4	42.52	42.52	30.59	23.81	21.07	P_KWMTBOMO05687	P_KWMTBOMO05687	P_KWMTBOMO05687	26
6	39.25	39.25	35.7	28.6	26.46	P_KWMTBOMO00462	P_KWMTBOMO00462	P_KWMTBOMO00462	25
14	29.68	29.72	51.89	51.89	46.54	P_KWMTBOMO05178	P_KWMTBOMO05178	P_KWMTBOMO05178	18
15	28.76	36.56	34.81	31.3	25.8	P_KWMTBOMO08642	P_KWMTBOMO08642	P_KWMTBOMO08642	24
18	27.72	27.72	25.78	18.15	17.34	P_KWMTBOMO06595	P_KWMTBOMO06595	P_KWMTBOMO06595	14
19	26.03	26.03	31.77	29.17	23.82	P_KWMTBOMO11096	P_KWMTBOMO11096	P_KWMTBOMO11096	17
20	24.71	24.71	28.7	22.1	16.1	P_KWMTBOMO13293	P_KWMTBOMO13293	P_KWMTBOMO13293	16
21	24.56	24.56	63.5	47.15	42.59	P_KWMTBOMO13455	P_KWMTBOMO13455	P_KWMTBOMO13455	13
24	22.57	22.57	36.81	36.81	34.62	P_KWMTBOMO09553	P_KWMTBOMO09553	P_KWMTBOMO09553	14
25	22.09	22.09	19.5	15.12	14.13	P_KWMTBOMO15159	P_KWMTBOMO15159	P_KWMTBOMO15159	12
26	21.82	21.82	50.32	44.62	44.3	P_KWMTBOMO09300	P_KWMTBOMO09300	P_KWMTBOMO09300	15
27	21.44	21.44	38.14	35.03	32.59	P_KWMTBOMO03092	P_KWMTBOMO03092	P_KWMTBOMO03092	14
28	21.21	21.21	34.28	34.04	26.24	P_KWMTBOMO11083	P_KWMTBOMO11083	P_KWMTBOMO11083	11
30	20.69	20.69	22.67	19.24	17.9	P_KWMTBOMO15198	P_KWMTBOMO15198	P_KWMTBOMO15198	16
31	20.55	22.35	29.58	29.58	24.05	P_KWMTBOMO12560	P_KWMTBOMO12560	P_KWMTBOMO12560	11
32	20.52	20.52	15.85	12.8	10.6	P_KWMTBOMO09055	P_KWMTBOMO09055	P_KWMTBOMO09055	11
34	19.85	19.85	42.27	38.14	34.02	P_KWMTBOMO11255	P_KWMTBOMO11255	P_KWMTBOMO11255	11
35	19.47	19.47	40.15	34.57	23.79	P_KWMTBOMO11985	P_KWMTBOMO11985	P_KWMTBOMO11985	12
37	19.2	19.2	60.26	54.97	54.97	P_KWMTBOMO08440	P_KWMTBOMO08440	P_KWMTBOMO08440	11
39	18.55	18.55	24.46	23.74	17.99	P_KWMTBOMO15357	P_KWMTBOMO15357	P_KWMTBOMO15357	11
40	18.54	18.54	16.37	14.77	11.58	P_KWMTBOMO05541	P_KWMTBOMO05541	P_KWMTBOMO05541	10
41	18.24	18.24	36.63	25.15	25.15	P_KWMTBOMO07374	P_KWMTBOMO07374	P_KWMTBOMO07374	12
42	18.16	18.16	29.38	24.67	21.66	P_KWMTBOMO09808	P_KWMTBOMO09808	P_KWMTBOMO09808	10
44	17.65	17.65	28.76	27.09	24.68	P_KWMTBOMO01075	P_KWMTBOMO01075	P_KWMTBOMO01075	11
47	17.29	17.29	14.86	12.67	11.81	P_KWMTBOMO00638	P_KWMTBOMO00638	P_KWMTBOMO00638	9
48	17.04	17.04	8.131	3.857	3.405	P_KWMTBOMO07761	P_KWMTBOMO07761	P_KWMTBOMO07761	8
49	16.85	16.85	24.25	21.46	21.46	P_KWMTBOMO07855	P_KWMTBOMO07855	P_KWMTBOMO07855	10
51	16.23	16.23	10.87	6.647	4.515	P_KWMTBOMO08648	P_KWMTBOMO08648	P_KWMTBOMO08648	8
52	16.12	16.12	14.72	9.983	9.222	P_KWMTBOMO10816	P_KWMTBOMO10816	P_KWMTBOMO10816	8
54	16.02	16.02	26.49	22.01	22.01	P_KWMTBOMO08699	P_KWMTBOMO08699	P_KWMTBOMO08699	11
57	15.47	15.47	46.74	37.16	34.87	P_KWMTBOMO07688	P_KWMTBOMO07688	P_KWMTBOMO07688	10
58	15.37	15.37	30.51	27.79	25.68	P_KWMTBOMO07103	P_KWMTBOMO07103	P_KWMTBOMO07103	9
59	15.3	15.3	15.65	13.79	9.938	P_KWMTBOMO11666	P_KWMTBOMO11666	P_KWMTBOMO11666	7
61	15.19	15.19	33.78	31.42	21.28	P_KWMTBOMO16197	P_KWMTBOMO16197	P_KWMTBOMO16197	6
63	15.02	15.02	17.17	15.15	14.14	P_KWMTBOMO16000	P_KWMTBOMO16000	P_KWMTBOMO16000	7
64	14.98	14.98	8.211	5.963	4.35	P_KWMTBOMO12878	P_KWMTBOMO12878	P_KWMTBOMO12878	8
65	14.84	14.84	12.13	9.323	6.436	P_KWMTBOMO12628	P_KWMTBOMO12628	P_KWMTBOMO12628	7
66	14.8	14.8	34.04	26.48	24.59	P_KWMTBOMO00375	P_KWMTBOMO00375	P_KWMTBOMO00375	7
67	14.54	14.54	24.95	24.95	18.66	P_KWMTBOMO15675	P_KWMTBOMO15675	P_KWMTBOMO15675	9
68	14.52	14.52	15.53	14.71	10.76	P_KWMTBOMO03430	P_KWMTBOMO03430	P_KWMTBOMO03430	8
69	14.38	14.38	36.32	32.41	21.84	P_KWMTBOMO09054	P_KWMTBOMO09054	P_KWMTBOMO09054	8
70	13.97	13.97	20	20	18.02	P_KWMTBOMO03626	P_KWMTBOMO03626	P_KWMTBOMO03626	9
71	13.86	13.86	27.14	20.22	15.3	P_KWMTBOMO00927	P_KWMTBOMO00927	P_KWMTBOMO00927	6
72	13.85	13.85	43.02	34.88	30.81	P_KWMTBOMO02278	P_KWMTBOMO02278	P_KWMTBOMO02278	8
73	13.62	13.62	62.12	62.12	50	P_KWMTBOMO09788	P_KWMTBOMO09788	P_KWMTBOMO09788	7
75	13.11	13.11	30.4	30.04	19.05	P_KWMTBOMO09442	P_KWMTBOMO09442	P_KWMTBOMO09442	8
76	13.03	13.03	12.71	12.71	9.116	P_KWMTBOMO15359	P_KWMTBOMO15359	P_KWMTBOMO15359	6
77	12.99	12.99	25.99	25.99	18.65	P_KWMTBOMO00497	P_KWMTBOMO00497	P_KWMTBOMO00497	6
78	12.97	12.97	38.24	31.03	20.38	P_KWMTBOMO01148	P_KWMTBOMO01148	P_KWMTBOMO01148	10
79	12.89	12.89	25.46	23.8	12.18	P_KWMTBOMO14887	P_KWMTBOMO14887	P_KWMTBOMO14887	6
80	12.64	12.64	47.14	40	40	P_KWMTBOMO00838	P_KWMTBOMO00838	P_KWMTBOMO00838	10
82	12.55	12.55	20.71	20.71	20.71	P_KWMTBOMO02081	P_KWMTBOMO02081	P_KWMTBOMO02081	10
84	12.45	12.45	30.81	24.49	21.21	P_KWMTBOMO15518	P_KWMTBOMO15518	P_KWMTBOMO15518	7
85	12.31	12.31	21.33	14.37	12.83	P_KWMTBOMO13370	P_KWMTBOMO13370	P_KWMTBOMO13370	9
86	12.18	12.18	27.12	27.12	26.8	P_KWMTBOMO10248	P_KWMTBOMO10248	P_KWMTBOMO10248	8
87	12.03	12.03	24.16	21.41	16.82	P_KWMTBOMO06763	P_KWMTBOMO06763	P_KWMTBOMO06763	6
89	12	12	37.39	37.39	37.39	P_KWMTBOMO01424	P_KWMTBOMO01424	P_KWMTBOMO01424	11
90	11.92	11.92	12.43	9.056	7.418	P_KWMTBOMO04768	P_KWMTBOMO04768	P_KWMTBOMO04768	6
91	11.87	11.87	33.59	33.59	30.53	P_KWMTBOMO08464	P_KWMTBOMO08464	P_KWMTBOMO08464	11
92	11.8	11.8	31.46	29.47	25.83	P_KWMTBOMO12389	P_KWMTBOMO12389	P_KWMTBOMO12389	8
93	11.68	11.68	28.26	20.37	10.28	P_KWMTBOMO13721	P_KWMTBOMO13721	P_KWMTBOMO13721	5
94	11.59	11.59	13.45	10.71	10.71	P_KWMTBOMO12895	P_KWMTBOMO12895	P_KWMTBOMO12895	9
95	11.53	11.53	16.8	9.336	8.195	P_KWMTBOMO05741	P_KWMTBOMO05741	P_KWMTBOMO05741	6
96	11.41	11.41	17.89	15.53	15.53	P_KWMTBOMO01720	P_KWMTBOMO01720	P_KWMTBOMO01720	7
97	11.35	11.35	20.59	17.81	15.85	P_KWMTBOMO15928	P_KWMTBOMO15928	P_KWMTBOMO15928	6
98	11.34	11.35	42.4	42.4	35.94	P_KWMTBOMO09232	P_KWMTBOMO09232	P_KWMTBOMO09232	9
100	11.16	11.16	39.89	37.16	37.16	P_KWMTBOMO06480	P_KWMTBOMO06480	P_KWMTBOMO06480	8
101	11.04	11.04	19.02	17.95	16.45	P_KWMTBOMO02470	P_KWMTBOMO02470	P_KWMTBOMO02470	6
102	10.99	10.99	30.41	26.27	26.27	P_KWMTBOMO08596	P_KWMTBOMO08596	P_KWMTBOMO08596	6
103	10.93	10.93	46.53	41.58	34.65	P_KWMTBOMO15361	P_KWMTBOMO15361	P_KWMTBOMO15361	6
104	10.9	10.9	58.19	46.89	31.64	P_KWMTBOMO13800	P_KWMTBOMO13800	P_KWMTBOMO13800	6
105	10.86	10.86	28.95	25.79	20.53	P_KWMTBOMO12018	P_KWMTBOMO12018	P_KWMTBOMO12018	5
106	10.85	10.85	13.88	12.48	11.08	P_KWMTBOMO11336	P_KWMTBOMO11336	P_KWMTBOMO11336	6
107	10.71	12.76	26.81	26.81	24.7	P_KWMTBOMO01182	P_KWMTBOMO01182	P_KWMTBOMO01182	7
108	10.65	10.65	10.24	8.867	7.404	P_KWMTBOMO09183	P_KWMTBOMO09183	P_KWMTBOMO09183	6
110	10.52	10.52	25.63	17.84	15.83	P_KWMTBOMO12166	P_KWMTBOMO12166	P_KWMTBOMO12166	5
111	10.51	10.52	24.49	23.11	18.99	P_KWMTBOMO06660	P_KWMTBOMO06660	P_KWMTBOMO06660	6
112	10.39	10.39	35.78	31.09	20.53	P_KWMTBOMO09474	P_KWMTBOMO09474	P_KWMTBOMO09474	5
113	10.16	10.16	44.12	44.12	38.24	P_KWMTBOMO13569	P_KWMTBOMO13569	P_KWMTBOMO13569	6
114	10.1	10.1	47.8	40.88	40.88	P_KWMTBOMO08100	P_KWMTBOMO08100	P_KWMTBOMO08100	6
115	9.96	9.96	20.88	18.16	13.99	P_KWMTBOMO08956	P_KWMTBOMO08956	P_KWMTBOMO08956	5
116	9.89	9.89	42.86	40.93	37.84	P_KWMTBOMO00339	P_KWMTBOMO00339	P_KWMTBOMO00339	6
117	9.86	9.86	32.2	23.84	19.2	P_KWMTBOMO03986	P_KWMTBOMO03986	P_KWMTBOMO03986	5
118	9.75	9.75	11.38	11.38	6.039	P_KWMTBOMO00427	P_KWMTBOMO00427	P_KWMTBOMO00427	6
119	9.72	9.72	7.011	4.348	3.424	P_KWMTBOMO12285	P_KWMTBOMO12285	P_KWMTBOMO12285	8
120	9.68	9.68	31.47	31.47	22.38	P_KWMTBOMO08666	P_KWMTBOMO08666	P_KWMTBOMO08666	6
121	9.58	9.58	19.07	15.37	8.704	P_KWMTBOMO12659	P_KWMTBOMO12659	P_KWMTBOMO12659	4
122	9.55	9.55	17.66	17.66	14.93	P_KWMTBOMO12461	P_KWMTBOMO12461	P_KWMTBOMO12461	6
123	9.45	9.45	26.47	26.47	26.47	P_KWMTBOMO02734	P_KWMTBOMO02734	P_KWMTBOMO02734	6
125	9.35	9.35	10.43	8.574	6.508	P_KWMTBOMO07589	P_KWMTBOMO07589	P_KWMTBOMO07589	4
126	9.35	9.35	13.82	10.81	10.81	P_KWMTBOMO01423	P_KWMTBOMO01423	P_KWMTBOMO01423	5
127	9.18	9.18	36.13	31.39	22.63	P_KWMTBOMO01796	P_KWMTBOMO01796	P_KWMTBOMO01796	4
128	9.14	9.14	27.57	27.57	23.46	P_KWMTBOMO04168	P_KWMTBOMO04168	P_KWMTBOMO04168	5
129	8.96	8.96	8.091	5.286	3.668	P_KWMTBOMO04610	P_KWMTBOMO04610	P_KWMTBOMO04610	4
130	8.91	8.91	36.49	36.49	36.49	P_KWMTBOMO14440	P_KWMTBOMO14440	P_KWMTBOMO14440	6
131	8.89	8.89	12.89	12.89	12.89	P_KWMTBOMO08040	P_KWMTBOMO08040	P_KWMTBOMO08040	7
132	8.84	8.84	58.41	58.41	41.59	P_KWMTBOMO08961	P_KWMTBOMO08961	P_KWMTBOMO08961	5
133	8.78	8.78	12.69	10.12	8.748	P_KWMTBOMO03301	P_KWMTBOMO03301	P_KWMTBOMO03301	4
134	8.76	8.76	17.21	14.15	8.604	P_KWMTBOMO08041	P_KWMTBOMO08041	P_KWMTBOMO08041	5
135	8.68	8.68	17.21	14.57	13.16	P_KWMTBOMO11680	P_KWMTBOMO11680	P_KWMTBOMO11680	8
136	8.61	8.61	13.99	9.191	8.092	P_KWMTBOMO00722	P_KWMTBOMO00722	P_KWMTBOMO00722	6
137	8.57	8.57	19.78	13.76	13.76	P_KWMTBOMO00279	P_KWMTBOMO00279	P_KWMTBOMO00279	5
139	8.5	8.51	5.662	5.662	4.749	P_KWMTBOMO04906	P_KWMTBOMO04906	P_KWMTBOMO04906	4
141	8.37	8.37	30.52	24.41	20.66	P_KWMTBOMO16481	P_KWMTBOMO16481	P_KWMTBOMO16481	4
142	8.17	8.17	40.4	33.77	23.18	P_KWMTBOMO13960	P_KWMTBOMO13960	P_KWMTBOMO13960	4
143	8.15	8.15	15.72	15.72	9.532	P_KWMTBOMO04502	P_KWMTBOMO04502	P_KWMTBOMO04502	4
144	8.1	8.1	7.719	3.108	3.108	P_KWMTBOMO08584	P_KWMTBOMO08584	P_KWMTBOMO08584	4
145	8.07	8.07	15.04	12.97	10.71	P_KWMTBOMO03722	P_KWMTBOMO03722	P_KWMTBOMO03722	4
146	8.05	8.05	37.43	24.6	24.6	P_KWMTBOMO12428	P_KWMTBOMO12428	P_KWMTBOMO12428	6
147	8.03	8.03	36.59	35.77	35.77	P_KWMTBOMO12287	P_KWMTBOMO12287	P_KWMTBOMO12287	5
148	8	8	1.223	1.071	1.071	P_KWMTBOMO15365	P_KWMTBOMO15365	P_KWMTBOMO15365	5
149	8	8	11.06	11.06	11.06	P_KWMTBOMO09415	P_KWMTBOMO09415	P_KWMTBOMO09415	6
150	8	8	13.23	13.23	13.23	P_KWMTBOMO02223	P_KWMTBOMO02223	P_KWMTBOMO02223	4
151	7.92	7.92	10.93	10.93	10.93	P_KWMTBOMO08204	P_KWMTBOMO08204	P_KWMTBOMO08204	4
152	7.9	7.9	19.16	11.92	11.92	P_KWMTBOMO14984	P_KWMTBOMO14984	P_KWMTBOMO14984	6
153	7.88	7.88	18.48	10.85	10.85	P_KWMTBOMO04605	P_KWMTBOMO04605	P_KWMTBOMO04605	4
154	7.88	7.88	38.42	38.42	34.21	P_KWMTBOMO03113	P_KWMTBOMO03113	P_KWMTBOMO03113	5
157	7.7	7.7	7.627	5.508	3.644	P_KWMTBOMO09542	P_KWMTBOMO09542	P_KWMTBOMO09542	4
158	7.64	8.78	18.92	16.13	15.48	P_KWMTBOMO14761	P_KWMTBOMO14761	P_KWMTBOMO14761	6
159	7.49	7.49	15.73	10.97	10.97	P_KWMTBOMO00473	P_KWMTBOMO00473	P_KWMTBOMO00473	4
160	7.47	7.47	29.41	29.41	29.41	P_KWMTBOMO11021	P_KWMTBOMO11021	P_KWMTBOMO11021	5
161	7.46	7.46	17.69	13.97	12.1	P_KWMTBOMO07323	P_KWMTBOMO07323	P_KWMTBOMO07323	4
162	7.44	7.44	33.82	24.51	15.2	P_KWMTBOMO03314	P_KWMTBOMO03314	P_KWMTBOMO03314	4
163	7.37	7.37	15.27	11.41	9.369	P_KWMTBOMO03002	P_KWMTBOMO03002	P_KWMTBOMO03002	4
165	7.31	7.31	6.533	5.729	4.925	P_KWMTBOMO10780	P_KWMTBOMO10780	P_KWMTBOMO10780	4
166	7.23	7.23	17.64	15.7	11.05	P_KWMTBOMO06354	P_KWMTBOMO06354	P_KWMTBOMO06354	5
167	7.22	7.23	13.45	10.69	7.069	P_KWMTBOMO02088	P_KWMTBOMO02088	P_KWMTBOMO02088	3
168	7.13	7.13	9.823	5.866	5.866	P_KWMTBOMO03177	P_KWMTBOMO03177	P_KWMTBOMO03177	4
169	7.1	7.1	14.58	11.81	7.196	P_KWMTBOMO00793	P_KWMTBOMO00793	P_KWMTBOMO00793	4
170	7.08	7.08	10.1	8.346	5.417	P_KWMTBOMO01452	P_KWMTBOMO01452	P_KWMTBOMO01452	3
171	7.06	7.06	35.25	29.5	28.78	P_KWMTBOMO08399	P_KWMTBOMO08399	P_KWMTBOMO08399	4
172	7.05	7.06	11.33	10.63	7.552	P_KWMTBOMO15060	P_KWMTBOMO15060	P_KWMTBOMO15060	5
173	6.99	6.99	14.55	9.887	6.356	P_KWMTBOMO09050	P_KWMTBOMO09050	P_KWMTBOMO09050	3
174	6.97	6.97	8.102	6.944	4.514	P_KWMTBOMO08815	P_KWMTBOMO08815	P_KWMTBOMO08815	4
175	6.96	6.96	28.85	18.59	18.59	P_KWMTBOMO16357	P_KWMTBOMO16357	P_KWMTBOMO16357	4
176	6.93	6.93	23.13	19.37	19.37	P_KWMTBOMO07772	P_KWMTBOMO07772	P_KWMTBOMO07772	4
177	6.81	6.81	20.74	20.74	17.06	P_KWMTBOMO11061	P_KWMTBOMO11061	P_KWMTBOMO11061	5
178	6.7	6.7	27.67	23.33	10.33	P_KWMTBOMO14732	P_KWMTBOMO14732	P_KWMTBOMO14732	3
180	6.68	6.68	5.762	3.631	3.631	P_KWMTBOMO03067	P_KWMTBOMO03067	P_KWMTBOMO03067	4
181	6.65	6.65	29.68	23.74	17.35	P_KWMTBOMO05979	P_KWMTBOMO05979	P_KWMTBOMO05979	5
182	6.65	6.65	4.343	2.796	2.32	P_KWMTBOMO09747	P_KWMTBOMO09747	P_KWMTBOMO09747	5
183	6.56	6.56	32.64	23.32	19.17	P_KWMTBOMO05281	P_KWMTBOMO05281	P_KWMTBOMO05281	4
184	6.55	6.55	20.88	20.88	15.26	P_KWMTBOMO02185	P_KWMTBOMO02185	P_KWMTBOMO02185	3
185	6.39	8.45	8.459	7.879	6.489	P_KWMTBOMO14157	P_KWMTBOMO14157	P_KWMTBOMO14157	4
186	6.36	6.36	19.04	10.91	10.91	P_KWMTBOMO06999	P_KWMTBOMO06999	P_KWMTBOMO06999	4
187	6.34	6.34	9.853	7.475	6.455	P_KWMTBOMO08045	P_KWMTBOMO08045	P_KWMTBOMO08045	4
188	6.34	6.34	48.48	41.41	41.41	P_KWMTBOMO02431	P_KWMTBOMO02431	P_KWMTBOMO02431	5
189	6.23	6.23	29.23	24.1	18.46	P_KWMTBOMO09355	P_KWMTBOMO09355	P_KWMTBOMO09355	3
190	6.14	6.14	13.81	10.62	9.027	P_KWMTBOMO08578	P_KWMTBOMO08578	P_KWMTBOMO08578	3
191	6.06	6.06	18.43	15.69	15.69	P_KWMTBOMO10916	P_KWMTBOMO10916	P_KWMTBOMO10916	5
192	6.02	6.02	9.892	8.387	8.387	P_KWMTBOMO05564	P_KWMTBOMO05564	P_KWMTBOMO05564	3
193	6.01	6.01	25	20.74	20.74	P_KWMTBOMO10453	P_KWMTBOMO10453	P_KWMTBOMO10453	3
194	6	6	17.14	9.61	9.61	P_KWMTBOMO14041	P_KWMTBOMO14041	P_KWMTBOMO14041	3
195	6	6	9.967	6.046	6.046	P_KWMTBOMO10779	P_KWMTBOMO10779	P_KWMTBOMO10779	4
196	6	6	31.18	18.82	18.82	P_KWMTBOMO02836	P_KWMTBOMO02836	P_KWMTBOMO02836	3
197	6	6	16.46	10.57	10.57	P_KWMTBOMO02835	P_KWMTBOMO02835	P_KWMTBOMO02835	3
198	6	6	12.06	9.92	9.92	P_KWMTBOMO06231	P_KWMTBOMO06231	P_KWMTBOMO06231	3
199	6	6	17.54	17.54	17.54	P_KWMTBOMO15757	P_KWMTBOMO15757	P_KWMTBOMO15757	3
200	6	6	8.194	8.194	8.194	P_KWMTBOMO12208	P_KWMTBOMO12208	P_KWMTBOMO12208	3
201	6	6	13.66	13.66	13.66	P_KWMTBOMO01431	P_KWMTBOMO01431	P_KWMTBOMO01431	3
202	6	6	16.83	16.83	16.83	P_KWMTBOMO00637	P_KWMTBOMO00637	P_KWMTBOMO00637	3
203	5.96	5.96	10.38	10.38	8.354	P_KWMTBOMO08310	P_KWMTBOMO08310	P_KWMTBOMO08310	3
204	5.95	5.95	5.258	2.05	1.649	P_KWMTBOMO05810	P_KWMTBOMO05810	P_KWMTBOMO05810	4
205	5.92	5.92	4.747	4.747	3.797	P_KWMTBOMO08343	P_KWMTBOMO08343	P_KWMTBOMO08343	3
206	5.88	5.88	14.56	8.696	7.183	P_KWMTBOMO01606	P_KWMTBOMO01606	P_KWMTBOMO01606	3
207	5.84	5.84	5.362	5.362	5.362	P_KWMTBOMO14549	P_KWMTBOMO14549	P_KWMTBOMO14549	4
208	5.82	5.82	15.2	10.69	10.69	P_KWMTBOMO08893	P_KWMTBOMO08893	P_KWMTBOMO08893	3
209	5.82	5.82	20.54	17.86	17.86	P_KWMTBOMO04740	P_KWMTBOMO04740	P_KWMTBOMO04740	3
210	5.8	5.8	8.229	5.86	5.86	P_KWMTBOMO01072	P_KWMTBOMO01072	P_KWMTBOMO01072	3
211	5.7	5.7	33.54	28.48	28.48	P_KWMTBOMO14479	P_KWMTBOMO14479	P_KWMTBOMO14479	3
212	5.69	5.69	32.21	26.85	26.85	P_KWMTBOMO13520	P_KWMTBOMO13520	P_KWMTBOMO13520	3
213	5.68	5.68	43.14	30.72	24.84	P_KWMTBOMO08820	P_KWMTBOMO08820	P_KWMTBOMO08820	6
214	5.64	5.64	20.09	19.63	15.53	P_KWMTBOMO08894	P_KWMTBOMO08894	P_KWMTBOMO08894	4
215	5.62	5.62	13.62	9.537	9.537	P_KWMTBOMO04370	P_KWMTBOMO04370	P_KWMTBOMO04370	3
216	5.62	5.62	22.13	15.98	15.98	P_KWMTBOMO10310	P_KWMTBOMO10310	P_KWMTBOMO10310	3
217	5.6	5.6	17.94	13.72	10.03	P_KWMTBOMO05258	P_KWMTBOMO05258	P_KWMTBOMO05258	3
218	5.53	5.53	9.396	4.602	3.547	P_KWMTBOMO04806	P_KWMTBOMO04806	P_KWMTBOMO04806	3
219	5.49	5.49	6.769	2.557	1.542	P_KWMTBOMO06045	P_KWMTBOMO06045	P_KWMTBOMO06045	3
220	5.48	5.48	12.43	12.43	12.43	P_KWMTBOMO10129	P_KWMTBOMO10129	P_KWMTBOMO10129	3
221	5.44	5.44	7.581	5.415	5.415	P_KWMTBOMO09838	P_KWMTBOMO09838	P_KWMTBOMO09838	3
222	5.38	5.38	15.49	10.63	6.903	P_KWMTBOMO03311	P_KWMTBOMO03311	P_KWMTBOMO03311	3
223	5.35	5.35	11.09	7.924	6.656	P_KWMTBOMO12094	P_KWMTBOMO12094	P_KWMTBOMO12094	3
224	5.31	5.31	48.48	48.48	19.39	P_KWMTBOMO05228	P_KWMTBOMO05228	P_KWMTBOMO05228	2
225	5.28	5.28	10.63	4.286	4.286	P_KWMTBOMO10243	P_KWMTBOMO10243	P_KWMTBOMO10243	3
226	5.28	5.28	19.63	19.63	19.63	P_KWMTBOMO11448	P_KWMTBOMO11448	P_KWMTBOMO11448	3
227	5.24	5.24	45.63	45.63	35.92	P_KWMTBOMO06772	P_KWMTBOMO06772	P_KWMTBOMO06772	3
228	5.21	5.21	16	16	16	P_KWMTBOMO09236	P_KWMTBOMO09236	P_KWMTBOMO09236	3
229	5.15	5.15	13.5	13.5	11.25	P_KWMTBOMO01312	P_KWMTBOMO01312	P_KWMTBOMO01312	3
230	5.14	5.14	20.42	20.42	9.155	P_KWMTBOMO07373	P_KWMTBOMO07373	P_KWMTBOMO07373	2
231	5.1	5.1	13.38	10.33	4.398	P_KWMTBOMO12264	P_KWMTBOMO12264	P_KWMTBOMO12264	2
232	5.06	5.06	17.22	11.48	11.48	P_KWMTBOMO04003	P_KWMTBOMO04003	P_KWMTBOMO04003	3
233	5.05	5.05	12.74	12.74	7.962	P_KWMTBOMO15758	P_KWMTBOMO15758	P_KWMTBOMO15758	3
234	5.04	5.04	36.57	18.66	18.66	P_KWMTBOMO14639	P_KWMTBOMO14639	P_KWMTBOMO14639	3
235	5.02	5.02	14.52	12.9	8.756	P_KWMTBOMO01114	P_KWMTBOMO01114	P_KWMTBOMO01114	4
237	4.98	4.98	10.65	4.565	4.565	P_KWMTBOMO07723	P_KWMTBOMO07723	P_KWMTBOMO07723	3
238	4.89	4.89	10.37	5.683	3.589	P_KWMTBOMO04051	P_KWMTBOMO04051	P_KWMTBOMO04051	4
239	4.86	4.86	34.15	33.54	24.39	P_KWMTBOMO11678	P_KWMTBOMO11678	P_KWMTBOMO11678	3
240	4.83	4.83	25	15.94	10.14	P_KWMTBOMO08046	P_KWMTBOMO08046	P_KWMTBOMO08046	2
241	4.79	4.79	34.8	18.14	9.804	P_KWMTBOMO01273	P_KWMTBOMO01273	P_KWMTBOMO01273	2
242	4.77	4.77	10.24	10.24	10.24	P_KWMTBOMO07821	P_KWMTBOMO07821	P_KWMTBOMO07821	3
243	4.76	4.76	27.7	24.32	16.22	P_KWMTBOMO08064	P_KWMTBOMO08064	P_KWMTBOMO08064	3
244	4.74	4.74	6.923	6.923	4.487	P_KWMTBOMO07874	P_KWMTBOMO07874	P_KWMTBOMO07874	2
245	4.67	4.67	28.02	17.48	8.997	P_KWMTBOMO05464	P_KWMTBOMO05464	P_KWMTBOMO05464	3
246	4.65	4.65	9.375	6.985	6.985	P_KWMTBOMO10337	P_KWMTBOMO10337	P_KWMTBOMO10337	3
247	4.63	4.63	18.31	7.094	7.094	P_KWMTBOMO14530	P_KWMTBOMO14530	P_KWMTBOMO14530	3
248	4.6	4.6	11.29	7.723	7.723	P_KWMTBOMO00982	P_KWMTBOMO00982	P_KWMTBOMO00982	3
249	4.59	6.82	34.93	25.36	16.27	P_KWMTBOMO03027	P_KWMTBOMO03027	P_KWMTBOMO03027	3
250	4.52	4.52	6.805	4.383	4.383	P_KWMTBOMO02535	P_KWMTBOMO02535	P_KWMTBOMO02535	2
251	4.51	4.51	5.864	4.691	2.452	P_KWMTBOMO12667	P_KWMTBOMO12667	P_KWMTBOMO12667	2
252	4.49	4.49	14.07	7.88	4.503	P_KWMTBOMO06770	P_KWMTBOMO06770	P_KWMTBOMO06770	2
253	4.45	4.45	18.49	14.34	11.32	P_KWMTBOMO11780	P_KWMTBOMO11780	P_KWMTBOMO11780	2
254	4.42	4.42	9.238	4.985	3.959	P_KWMTBOMO05321	P_KWMTBOMO05321	P_KWMTBOMO05321	2
255	4.39	4.39	32.86	28.57	28.57	P_KWMTBOMO10049	P_KWMTBOMO10049	P_KWMTBOMO10049	2
256	4.36	4.36	39.5	26.89	19.33	P_KWMTBOMO15114	P_KWMTBOMO15114	P_KWMTBOMO15114	3
257	4.35	4.35	2.641	1.086	0.6171	P_KWMTBOMO12602	P_KWMTBOMO12602	P_KWMTBOMO12602	2
258	4.31	4.31	14.98	14.98	11.59	P_KWMTBOMO08106	P_KWMTBOMO08106	P_KWMTBOMO08106	2
259	4.3	4.3	13.45	13.45	10.31	P_KWMTBOMO09900	P_KWMTBOMO09900	P_KWMTBOMO09900	2
260	4.29	4.29	4.715	2.758	2.224	P_KWMTBOMO05295	P_KWMTBOMO05295	P_KWMTBOMO05295	2
262	4.25	4.25	3.82	3.82	2.84	P_KWMTBOMO13235	P_KWMTBOMO13235	P_KWMTBOMO13235	2
263	4.24	4.24	13.95	10.3	6.652	P_KWMTBOMO02500	P_KWMTBOMO02500	P_KWMTBOMO02500	2
264	4.22	4.22	7.277	7.277	5.634	P_KWMTBOMO11413	P_KWMTBOMO11413	P_KWMTBOMO11413	2
265	4.21	4.21	14.76	7.619	4.603	P_KWMTBOMO07205	P_KWMTBOMO07205	P_KWMTBOMO07205	2
266	4.07	4.07	14.29	6.926	6.926	P_KWMTBOMO15547	P_KWMTBOMO15547	P_KWMTBOMO15547	2
267	4.06	4.06	14.92	9.153	4.746	P_KWMTBOMO15769	P_KWMTBOMO15769	P_KWMTBOMO15769	2
268	4.06	4.06	23.05	12.41	8.156	P_KWMTBOMO00362	P_KWMTBOMO00362	P_KWMTBOMO00362	2
269	4.06	4.06	8.222	6.222	6.222	P_KWMTBOMO10283	P_KWMTBOMO10283	P_KWMTBOMO10283	2
270	4.05	4.05	15.95	7.143	7.143	P_KWMTBOMO16204	P_KWMTBOMO16204	P_KWMTBOMO16204	2
271	4.04	4.04	7.854	1.964	1.964	P_KWMTBOMO08707	P_KWMTBOMO08707	P_KWMTBOMO08707	2
272	4.02	4.02	23.2	8.247	6.443	P_KWMTBOMO14160	P_KWMTBOMO14160	P_KWMTBOMO14160	2
273	4.02	4.02	40.64	29.41	17.11	P_KWMTBOMO07857	P_KWMTBOMO07857	P_KWMTBOMO07857	2
274	4.02	4.02	14.22	6.321	6.321	P_KWMTBOMO14804	P_KWMTBOMO14804	P_KWMTBOMO14804	2
275	4.02	4.02	12.28	8.02	8.02	P_KWMTBOMO08241	P_KWMTBOMO08241	P_KWMTBOMO08241	2
276	4.02	4.02	8.14	6.279	6.279	P_KWMTBOMO02061	P_KWMTBOMO02061	P_KWMTBOMO02061	2
277	4.01	4.01	4.582	1.61	1.61	P_KWMTBOMO15715	P_KWMTBOMO15715	P_KWMTBOMO15715	2
278	4.01	4.01	13.68	6.197	6.197	P_KWMTBOMO13729	P_KWMTBOMO13729	P_KWMTBOMO13729	2
279	4	4	9.312	6.478	6.478	P_KWMTBOMO05993	P_KWMTBOMO05993	P_KWMTBOMO05993	2
280	4	4	14.55	9.697	9.697	P_KWMTBOMO02914	P_KWMTBOMO02914	P_KWMTBOMO02914	2
282	4	4	9.685	9.685	9.685	P_KWMTBOMO16261	P_KWMTBOMO16261	P_KWMTBOMO16261	2
283	4	4	4.388	4.388	4.388	P_KWMTBOMO14942	P_KWMTBOMO14942	P_KWMTBOMO14942	2
284	4	4	14.68	14.68	14.68	P_KWMTBOMO12448	P_KWMTBOMO12448	P_KWMTBOMO12448	2
285	4	4	35.62	35.62	35.62	P_KWMTBOMO08098	P_KWMTBOMO08098	P_KWMTBOMO08098	3
286	4	4	8.232	8.232	8.232	P_KWMTBOMO06082	P_KWMTBOMO06082	P_KWMTBOMO06082	2
287	4	4	21.65	21.65	21.65	P_KWMTBOMO01918	P_KWMTBOMO01918	P_KWMTBOMO01918	2
288	4	4	16.85	16.85	16.85	P_KWMTBOMO00860	P_KWMTBOMO00860	P_KWMTBOMO00860	2
289	4	4	11.45	11.45	11.45	P_KWMTBOMO00837	P_KWMTBOMO00837	P_KWMTBOMO00837	2
290	3.96	3.96	12.93	12.93	12.93	P_KWMTBOMO11771	P_KWMTBOMO11771	P_KWMTBOMO11771	2
291	3.96	3.96	18.46	18.46	18.46	P_KWMTBOMO06373	P_KWMTBOMO06373	P_KWMTBOMO06373	2
292	3.93	3.93	22.5	17.5	12.5	P_KWMTBOMO02477	P_KWMTBOMO02477	P_KWMTBOMO02477	4
293	3.92	3.92	4.959	4.959	4.959	P_KWMTBOMO04132	P_KWMTBOMO04132	P_KWMTBOMO04132	2
294	3.89	3.89	20.45	20.45	20.45	P_KWMTBOMO10591	P_KWMTBOMO10591	P_KWMTBOMO10591	2
295	3.86	3.86	5.774	4.054	2.826	P_KWMTBOMO07820	P_KWMTBOMO07820	P_KWMTBOMO07820	2
296	3.84	3.84	56.84	56.84	34.74	P_KWMTBOMO14478	P_KWMTBOMO14478	P_KWMTBOMO14478	2
297	3.82	3.82	5.192	1.354	1.084	P_KWMTBOMO06632	P_KWMTBOMO06632	P_KWMTBOMO06632	2
298	3.81	3.82	20.93	20.93	20.93	P_KWMTBOMO05723	P_KWMTBOMO05723	P_KWMTBOMO05723	5
299	3.73	6.08	14.2	8.148	5.679	P_KWMTBOMO12844	P_KWMTBOMO12844	P_KWMTBOMO12844	5
300	3.67	3.67	15.13	15.13	9.244	P_KWMTBOMO01068	P_KWMTBOMO01068	P_KWMTBOMO01068	2
301	3.66	3.66	27.24	24.73	24.73	P_KWMTBOMO06427	P_KWMTBOMO06427	P_KWMTBOMO06427	3
302	3.65	3.65	18.6	7.907	7.907	P_KWMTBOMO09390	P_KWMTBOMO09390	P_KWMTBOMO09390	2
303	3.64	3.64	4.589	4.589	4.589	P_KWMTBOMO03473	P_KWMTBOMO03473	P_KWMTBOMO03473	2
304	3.6	3.6	3.809	1.549	1.549	P_KWMTBOMO06932	P_KWMTBOMO06932	P_KWMTBOMO06932	2
305	3.6	3.6	4.515	3.718	3.718	P_KWMTBOMO04568	P_KWMTBOMO04568	P_KWMTBOMO04568	2
306	3.57	3.57	13.19	8.425	8.425	P_KWMTBOMO04789	P_KWMTBOMO04789	P_KWMTBOMO04789	2
307	3.57	3.57	8.56	8.56	8.56	P_KWMTBOMO11486	P_KWMTBOMO11486	P_KWMTBOMO11486	2
308	3.51	3.51	52.56	52.56	34.62	P_KWMTBOMO12193	P_KWMTBOMO12193	P_KWMTBOMO12193	2
309	3.51	3.51	5.294	5.294	5.294	P_KWMTBOMO03271	P_KWMTBOMO03271	P_KWMTBOMO03271	2
310	3.44	3.44	34.85	18.18	18.18	P_KWMTBOMO01055	P_KWMTBOMO01055	P_KWMTBOMO01055	3
311	3.35	3.35	22.75	18.82	14.51	P_KWMTBOMO09934	P_KWMTBOMO09934	P_KWMTBOMO09934	3
312	3.34	3.35	5.71	5.71	2.786	P_KWMTBOMO10358	P_KWMTBOMO10358	P_KWMTBOMO10358	1
313	3.33	3.33	6.966	6.966	5.618	P_KWMTBOMO02840	P_KWMTBOMO02840	P_KWMTBOMO02840	2
314	3.3	3.3	15.02	10.28	7.51	P_KWMTBOMO15066	P_KWMTBOMO15066	P_KWMTBOMO15066	2
315	3.28	3.28	6.802	1.291	1.291	P_KWMTBOMO11045	P_KWMTBOMO11045	P_KWMTBOMO11045	2
316	3.25	3.25	18.07	13.45	10.08	P_KWMTBOMO09387	P_KWMTBOMO09387	P_KWMTBOMO09387	2
317	3.25	3.25	23.53	23.53	23.53	P_KWMTBOMO04674	P_KWMTBOMO04674	P_KWMTBOMO04674	2
318	3.22	3.22	15.35	15.35	11.2	P_KWMTBOMO11710	P_KWMTBOMO11710	P_KWMTBOMO11710	2
319	3.22	3.22	16.25	11.87	11.87	P_KWMTBOMO01131	P_KWMTBOMO01131	P_KWMTBOMO01131	2
320	3.14	3.14	13.62	13.62	9.859	P_KWMTBOMO05566	P_KWMTBOMO05566	P_KWMTBOMO05566	2
321	3.14	3.14	6.173	6.173	6.173	P_KWMTBOMO11514	P_KWMTBOMO11514	P_KWMTBOMO11514	2
322	3.13	3.13	45.24	29.76	29.76	P_KWMTBOMO03951	P_KWMTBOMO03951	P_KWMTBOMO03951	3
323	3.1	3.1	24.51	21.57	21.57	P_KWMTBOMO09631	P_KWMTBOMO09631	P_KWMTBOMO09631	3
324	3.07	3.07	8.916	8.916	6.747	P_KWMTBOMO10965	P_KWMTBOMO10965	P_KWMTBOMO10965	2
325	3.03	3.03	4.177	4.177	2.864	P_KWMTBOMO05357	P_KWMTBOMO05357	P_KWMTBOMO05357	2
326	3.01	5.17	11.66	6.7	6.7	P_KWMTBOMO12199	P_KWMTBOMO12199	P_KWMTBOMO12199	3
327	2.99	2.99	8.105	3.137	3.137	P_KWMTBOMO13712	P_KWMTBOMO13712	P_KWMTBOMO13712	2
328	2.98	2.98	8.804	8.804	6.095	P_KWMTBOMO08056	P_KWMTBOMO08056	P_KWMTBOMO08056	2
329	2.95	2.95	21.3	21.3	21.3	P_KWMTBOMO02542	P_KWMTBOMO02542	P_KWMTBOMO02542	2
330	2.92	2.92	21.85	21.85	9.244	P_KWMTBOMO12706	P_KWMTBOMO12706	P_KWMTBOMO12706	1
331	2.91	2.91	6.742	3.23	3.23	P_KWMTBOMO13226	P_KWMTBOMO13226	P_KWMTBOMO13226	2
332	2.91	2.91	8.382	6.043	2.534	P_KWMTBOMO04170	P_KWMTBOMO04170	P_KWMTBOMO04170	1
333	2.91	2.91	10.48	10.48	10.48	P_KWMTBOMO00254	P_KWMTBOMO00254	P_KWMTBOMO00254	2
334	2.9	2.91	26.98	20.63	20.63	P_KWMTBOMO02082	P_KWMTBOMO02082	P_KWMTBOMO02082	2
335	2.9	2.91	5.696	5.696	5.696	P_KWMTBOMO12442	P_KWMTBOMO12442	P_KWMTBOMO12442	2
336	2.84	2.84	10.5	6.241	2.553	P_KWMTBOMO15125	P_KWMTBOMO15125	P_KWMTBOMO15125	1
337	2.84	2.84	2.908	2.908	2.908	P_KWMTBOMO05612	P_KWMTBOMO05612	P_KWMTBOMO05612	2
338	2.75	2.75	8.075	6.211	6.211	P_KWMTBOMO10558	P_KWMTBOMO10558	P_KWMTBOMO10558	2
339	2.75	2.75	10.87	10.87	10.87	P_KWMTBOMO05975	P_KWMTBOMO05975	P_KWMTBOMO05975	2
340	2.69	2.69	7.991	3.196	3.196	P_KWMTBOMO09621	P_KWMTBOMO09621	P_KWMTBOMO09621	2
341	2.69	2.69	6.117	4.787	4.122	P_KWMTBOMO06291	P_KWMTBOMO06291	P_KWMTBOMO06291	2
342	2.69	2.69	14.6	14.6	5.752	P_KWMTBOMO03975	P_KWMTBOMO03975	P_KWMTBOMO03975	1
343	2.67	2.67	25.59	18.48	7.109	P_KWMTBOMO00794	P_KWMTBOMO00794	P_KWMTBOMO00794	1
344	2.66	2.66	7.012	3.84	2.003	P_KWMTBOMO10212	P_KWMTBOMO10212	P_KWMTBOMO10212	1
345	2.65	2.65	6.687	6.687	3.647	P_KWMTBOMO08776	P_KWMTBOMO08776	P_KWMTBOMO08776	1
346	2.64	4.8	16.93	10.76	5.492	P_KWMTBOMO15123	P_KWMTBOMO15123	P_KWMTBOMO15123	3
347	2.63	2.63	21.54	20.77	13.85	P_KWMTBOMO07368	P_KWMTBOMO07368	P_KWMTBOMO07368	2
348	2.62	2.62	14.73	4.751	2.375	P_KWMTBOMO04330	P_KWMTBOMO04330	P_KWMTBOMO04330	1
349	2.61	2.62	9.725	6.977	3.805	P_KWMTBOMO10169	P_KWMTBOMO10169	P_KWMTBOMO10169	2
350	2.58	2.7	20.1	10.05	3.431	P_KWMTBOMO05820	P_KWMTBOMO05820	P_KWMTBOMO05820	2
351	2.56	2.56	5.076	5.076	2.876	P_KWMTBOMO05205	P_KWMTBOMO05205	P_KWMTBOMO05205	1
352	2.56	2.56	7.368	7.368	3.509	P_KWMTBOMO03721	P_KWMTBOMO03721	P_KWMTBOMO03721	1
353	2.55	2.55	27.64	21.95	10.57	P_KWMTBOMO01941	P_KWMTBOMO01941	P_KWMTBOMO01941	2
354	2.52	2.52	14.71	8.824	6.618	P_KWMTBOMO09672	P_KWMTBOMO09672	P_KWMTBOMO09672	1
355	2.49	2.49	26.55	15.82	11.3	P_KWMTBOMO01380	P_KWMTBOMO01380	P_KWMTBOMO01380	1
356	2.49	2.49	4.974	4.974	2.88	P_KWMTBOMO02013	P_KWMTBOMO02013	P_KWMTBOMO02013	1
357	2.48	2.48	11.62	8.838	4.545	P_KWMTBOMO11192	P_KWMTBOMO11192	P_KWMTBOMO11192	1
358	2.42	2.42	15.09	7.075	7.075	P_KWMTBOMO02468	P_KWMTBOMO02468	P_KWMTBOMO02468	2
359	2.42	2.42	2.815	1.542	0.6702	P_KWMTBOMO07214	P_KWMTBOMO07214	P_KWMTBOMO07214	1
360	2.4	2.4	15.7	4.045	2.589	P_KWMTBOMO03630	P_KWMTBOMO03630	P_KWMTBOMO03630	1
361	2.35	2.35	10.67	10.67	5.618	P_KWMTBOMO11812	P_KWMTBOMO11812	P_KWMTBOMO11812	1
362	2.34	2.34	13.85	13.85	5.897	P_KWMTBOMO16309	P_KWMTBOMO16309	P_KWMTBOMO16309	1
363	2.33	2.33	5.959	3.576	2.503	P_KWMTBOMO10661	P_KWMTBOMO10661	P_KWMTBOMO10661	1
364	2.32	2.32	16.28	4.128	2.523	P_KWMTBOMO05987	P_KWMTBOMO05987	P_KWMTBOMO05987	1
365	2.3	2.32	22.63	13.68	13.68	P_KWMTBOMO14024	P_KWMTBOMO14024	P_KWMTBOMO14024	2
366	2.3	2.3	12.01	5.587	3.352	P_KWMTBOMO14715	P_KWMTBOMO14715	P_KWMTBOMO14715	2
367	2.29	2.29	12.88	6.301	3.836	P_KWMTBOMO05806	P_KWMTBOMO05806	P_KWMTBOMO05806	1
368	2.25	2.25	6.326	6.326	2.676	P_KWMTBOMO00390	P_KWMTBOMO00390	P_KWMTBOMO00390	1
369	2.22	2.22	9.045	6.03	4.523	P_KWMTBOMO12902	P_KWMTBOMO12902	P_KWMTBOMO12902	1
370	2.2	2.2	14.55	6.343	6.343	P_KWMTBOMO11161	P_KWMTBOMO11161	P_KWMTBOMO11161	2
371	2.19	2.19	10.48	5.645	2.823	P_KWMTBOMO12037	P_KWMTBOMO12037	P_KWMTBOMO12037	1
372	2.18	2.18	27.88	13.46	13.46	P_KWMTBOMO06974	P_KWMTBOMO06974	P_KWMTBOMO06974	1
373	2.18	2.18	8.333	8.333	5.556	P_KWMTBOMO05719	P_KWMTBOMO05719	P_KWMTBOMO05719	1
374	2.17	2.17	50.89	43.75	43.75	P_KWMTBOMO09230	P_KWMTBOMO09230	P_KWMTBOMO09230	2
375	2.16	2.17	17.07	8.014	4.181	P_KWMTBOMO08930	P_KWMTBOMO08930	P_KWMTBOMO08930	1
376	2.16	2.16	13.25	13.25	13.25	P_KWMTBOMO00974	P_KWMTBOMO00974	P_KWMTBOMO00974	2
377	2.15	2.15	9.091	6.643	3.497	P_KWMTBOMO03860	P_KWMTBOMO03860	P_KWMTBOMO03860	1
378	2.12	2.6	11.06	4.941	3.529	P_KWMTBOMO08672	P_KWMTBOMO08672	P_KWMTBOMO08672	1
379	2.08	2.08	4.873	1.287	1.287	P_KWMTBOMO12304	P_KWMTBOMO12304	P_KWMTBOMO12304	2
380	2.08	2.08	13.78	11.54	3.846	P_KWMTBOMO15665	P_KWMTBOMO15665	P_KWMTBOMO15665	1
381	2.08	2.08	7.468	7.468	5.195	P_KWMTBOMO06474	P_KWMTBOMO06474	P_KWMTBOMO06474	1
382	2.07	2.07	14.36	10.37	10.37	P_KWMTBOMO14845	P_KWMTBOMO14845	P_KWMTBOMO14845	2
383	2.07	2.07	2.904	2.904	1.815	P_KWMTBOMO14936	P_KWMTBOMO14936	P_KWMTBOMO14936	1
384	2.04	2.04	10.58	2.794	2.794	P_KWMTBOMO15121	P_KWMTBOMO15121	P_KWMTBOMO15121	1
385	2.04	2.04	4.185	1.652	1.652	P_KWMTBOMO11064	P_KWMTBOMO11064	P_KWMTBOMO11064	2
386	2.02	2.02	9.677	3.871	3.871	P_KWMTBOMO13369	P_KWMTBOMO13369	P_KWMTBOMO13369	1
387	2.02	2.02	2.724	1.362	1.362	P_KWMTBOMO10489	P_KWMTBOMO10489	P_KWMTBOMO10489	1
388	2.02	2.02	5.303	5.303	2.424	P_KWMTBOMO09954	P_KWMTBOMO09954	P_KWMTBOMO09954	2
389	2.02	2.02	11.6	11.6	8	P_KWMTBOMO04427	P_KWMTBOMO04427	P_KWMTBOMO04427	1
390	2.01	2.01	5.008	0.9852	0.9852	P_KWMTBOMO04877	P_KWMTBOMO04877	P_KWMTBOMO04877	1
391	2.01	2.01	7.542	2.396	1.508	P_KWMTBOMO01821	P_KWMTBOMO01821	P_KWMTBOMO01821	1
392	2.01	2.01	7.069	2.069	2.069	P_KWMTBOMO11590	P_KWMTBOMO11590	P_KWMTBOMO11590	1
393	2.01	2.01	11.72	3.297	3.297	P_KWMTBOMO09641	P_KWMTBOMO09641	P_KWMTBOMO09641	1
394	2.01	2.01	12.41	5.474	5.474	P_KWMTBOMO05976	P_KWMTBOMO05976	P_KWMTBOMO05976	1
395	2.01	2.01	4.415	3.091	3.091	P_KWMTBOMO04737	P_KWMTBOMO04737	P_KWMTBOMO04737	1
396	2	6	16.75	16.75	16.75	P_KWMTBOMO06927	P_KWMTBOMO06927	P_KWMTBOMO06927	3
397	2	2.01	6.278	1.682	1.682	P_KWMTBOMO06100	P_KWMTBOMO06100	P_KWMTBOMO06100	1
398	2	2.01	7.348	2.875	2.875	P_KWMTBOMO05299	P_KWMTBOMO05299	P_KWMTBOMO05299	1
399	2	2.01	4.176	3.077	3.077	P_KWMTBOMO15781	P_KWMTBOMO15781	P_KWMTBOMO15781	1
400	2	2	4.139	0.8467	0.8467	P_KWMTBOMO06227	P_KWMTBOMO06227	P_KWMTBOMO06227	1
401	2	2	39.19	6.757	6.757	P_KWMTBOMO07930	P_KWMTBOMO07930	P_KWMTBOMO07930	1
402	2	2	50.57	22.99	22.99	P_KWMTBOMO13722	P_KWMTBOMO13722	P_KWMTBOMO13722	1
403	2	2	26.62	6.475	6.475	P_KWMTBOMO11987	P_KWMTBOMO11987	P_KWMTBOMO11987	1
404	2	2	12.81	5.292	5.292	P_KWMTBOMO08607	P_KWMTBOMO08607	P_KWMTBOMO08607	1
405	2	2	3.391	1.647	1.647	P_KWMTBOMO04757	P_KWMTBOMO04757	P_KWMTBOMO04757	1
406	2	2	6.4	2.08	2.08	P_KWMTBOMO02354	P_KWMTBOMO02354	P_KWMTBOMO02354	1
407	2	2	3.793	1.293	1.293	P_KWMTBOMO01806	P_KWMTBOMO01806	P_KWMTBOMO01806	1
408	2	2	4.274	1.099	1.099	P_KWMTBOMO00303	P_KWMTBOMO00303	P_KWMTBOMO00303	1
409	2	2	1.454	0.3436	0.3436	P_KWMTBOMO15035	P_KWMTBOMO15035	P_KWMTBOMO15035	1
410	2	2	11.3	11.3	11.3	P_KWMTBOMO12903	P_KWMTBOMO12903	P_KWMTBOMO12903	2
411	2	2	7.292	4.514	4.514	P_KWMTBOMO11202	P_KWMTBOMO11202	P_KWMTBOMO11202	1
412	2	2	15.82	6.78	6.78	P_KWMTBOMO10147	P_KWMTBOMO10147	P_KWMTBOMO10147	1
413	2	2	2.985	2.171	2.171	P_KWMTBOMO09811	P_KWMTBOMO09811	P_KWMTBOMO09811	1
414	2	2	1.589	1.059	1.059	P_KWMTBOMO08734	P_KWMTBOMO08734	P_KWMTBOMO08734	1
415	2	2	9.123	5.263	5.263	P_KWMTBOMO08323	P_KWMTBOMO08323	P_KWMTBOMO08323	1
417	2	2	9.145	4.425	4.425	P_KWMTBOMO07278	P_KWMTBOMO07278	P_KWMTBOMO07278	1
418	2	2	9.205	5.858	5.858	P_KWMTBOMO05784	P_KWMTBOMO05784	P_KWMTBOMO05784	1
419	2	2	9.756	5.285	5.285	P_KWMTBOMO04424	P_KWMTBOMO04424	P_KWMTBOMO04424	1
421	2	2	8.202	4.101	4.101	P_KWMTBOMO03337	P_KWMTBOMO03337	P_KWMTBOMO03337	1
422	2	2	8.667	6	6	P_KWMTBOMO02775	P_KWMTBOMO02775	P_KWMTBOMO02775	1
423	2	2	10.91	7.273	7.273	P_KWMTBOMO01129	P_KWMTBOMO01129	P_KWMTBOMO01129	1
424	2	2	6.215	3.578	3.578	P_KWMTBOMO00366	P_KWMTBOMO00366	P_KWMTBOMO00366	1
425	2	2	8.571	8.571	8.571	P_KWMTBOMO16319	P_KWMTBOMO16319	P_KWMTBOMO16319	1
426	2	2	4.487	4.487	4.487	P_KWMTBOMO16040	P_KWMTBOMO16040	P_KWMTBOMO16040	1
427	2	2	3.743	3.743	3.743	P_KWMTBOMO15712	P_KWMTBOMO15712	P_KWMTBOMO15712	1
428	2	2	10.92	10.92	10.92	P_KWMTBOMO15520	P_KWMTBOMO15520	P_KWMTBOMO15520	1
429	2	2	3.933	3.933	3.933	P_KWMTBOMO15419	P_KWMTBOMO15419	P_KWMTBOMO15419	1
430	2	2	4	4	4	P_KWMTBOMO15341	P_KWMTBOMO15341	P_KWMTBOMO15341	1
431	2	2	2.874	2.874	2.874	P_KWMTBOMO15179	P_KWMTBOMO15179	P_KWMTBOMO15179	1
432	2	2	1.385	1.385	1.385	P_KWMTBOMO14962	P_KWMTBOMO14962	P_KWMTBOMO14962	1
433	2	2	4.816	4.816	4.816	P_KWMTBOMO14877	P_KWMTBOMO14877	P_KWMTBOMO14877	1
434	2	2	3.625	3.625	3.625	P_KWMTBOMO14752	P_KWMTBOMO14752	P_KWMTBOMO14752	1
435	2	2	5.422	5.422	5.422	P_KWMTBOMO13923	P_KWMTBOMO13923	P_KWMTBOMO13923	1
436	2	2	11.21	11.21	11.21	P_KWMTBOMO13899	P_KWMTBOMO13899	P_KWMTBOMO13899	1
437	2	2	5.263	5.263	5.263	P_KWMTBOMO13723	P_KWMTBOMO13723	P_KWMTBOMO13723	1
438	2	2	11.69	11.69	11.69	P_KWMTBOMO13530	P_KWMTBOMO13530	P_KWMTBOMO13530	1
439	2	2	4.18	4.18	4.18	P_KWMTBOMO13301	P_KWMTBOMO13301	P_KWMTBOMO13301	1
440	2	2	9.15	9.15	9.15	P_KWMTBOMO12682	P_KWMTBOMO12682	P_KWMTBOMO12682	1
441	2	2	4.594	4.594	4.594	P_KWMTBOMO11977	P_KWMTBOMO11977	P_KWMTBOMO11977	1
442	2	2	7.558	7.558	7.558	P_KWMTBOMO10354	P_KWMTBOMO10354	P_KWMTBOMO10354	1
443	2	2	4.805	4.805	4.805	P_KWMTBOMO09250	P_KWMTBOMO09250	P_KWMTBOMO09250	1
444	2	2	3.07	3.07	3.07	P_KWMTBOMO08991	P_KWMTBOMO08991	P_KWMTBOMO08991	1
445	2	2	17.39	17.39	17.39	P_KWMTBOMO08193	P_KWMTBOMO08193	P_KWMTBOMO08193	1
446	2	2	1.891	1.891	1.891	P_KWMTBOMO07274	P_KWMTBOMO07274	P_KWMTBOMO07274	1
447	2	2	7.222	7.222	7.222	P_KWMTBOMO06558	P_KWMTBOMO06558	P_KWMTBOMO06558	1
448	2	2	10.09	10.09	10.09	P_KWMTBOMO06299	P_KWMTBOMO06299	P_KWMTBOMO06299	1
449	2	2	2.293	2.293	2.293	P_KWMTBOMO05364	P_KWMTBOMO05364	P_KWMTBOMO05364	1
450	2	2	6.303	6.303	6.303	P_KWMTBOMO05254	P_KWMTBOMO05254	P_KWMTBOMO05254	1
451	2	2	12.16	12.16	12.16	P_KWMTBOMO05032	P_KWMTBOMO05032	P_KWMTBOMO05032	2
452	2	2	5.019	5.019	5.019	P_KWMTBOMO04992	P_KWMTBOMO04992	P_KWMTBOMO04992	1
453	2	2	6.011	6.011	6.011	P_KWMTBOMO04584	P_KWMTBOMO04584	P_KWMTBOMO04584	1
454	2	2	6	6	6	P_KWMTBOMO04167	P_KWMTBOMO04167	P_KWMTBOMO04167	1
455	2	2	5.281	5.281	5.281	P_KWMTBOMO03169	P_KWMTBOMO03169	P_KWMTBOMO03169	1
456	2	2	8.571	8.571	8.571	P_KWMTBOMO03003	P_KWMTBOMO03003	P_KWMTBOMO03003	1
457	2	2	2.699	2.699	2.699	P_KWMTBOMO02577	P_KWMTBOMO02577	P_KWMTBOMO02577	1
458	2	2	4.58	4.58	4.58	P_KWMTBOMO02392	P_KWMTBOMO02392	P_KWMTBOMO02392	1
459	2	2	2.012	2.012	2.012	P_KWMTBOMO02096	P_KWMTBOMO02096	P_KWMTBOMO02096	1
460	2	2	4.408	4.408	4.408	P_KWMTBOMO01802	P_KWMTBOMO01802	P_KWMTBOMO01802	1
461	2	2	3.017	3.017	3.017	P_KWMTBOMO01708	P_KWMTBOMO01708	P_KWMTBOMO01708	1
462	2	2	8.92	8.92	8.92	P_KWMTBOMO01662	P_KWMTBOMO01662	P_KWMTBOMO01662	1
463	2	2	4	4	4	P_KWMTBOMO01315	P_KWMTBOMO01315	P_KWMTBOMO01315	1
464	2	2	4.222	4.222	4.222	P_KWMTBOMO00223	P_KWMTBOMO00223	P_KWMTBOMO00223	1
465	2	2	1.542	1.542	1.542	P_KWMTBOMO00106	P_KWMTBOMO00106	P_KWMTBOMO00106	1
466	1.92	1.92	7.47	3.133	3.133	P_KWMTBOMO08760	P_KWMTBOMO08760	P_KWMTBOMO08760	1
467	1.92	1.92	12.14	12.14	12.14	P_KWMTBOMO15875	P_KWMTBOMO15875	P_KWMTBOMO15875	1
468	1.92	1.92	9.938	9.938	9.938	P_KWMTBOMO07247	P_KWMTBOMO07247	P_KWMTBOMO07247	1
469	1.89	1.92	7.821	7.821	7.821	P_KWMTBOMO06401	P_KWMTBOMO06401	P_KWMTBOMO06401	1
470	1.89	1.89	15.14	8.108	4.324	P_KWMTBOMO15584	P_KWMTBOMO15584	P_KWMTBOMO15584	1
471	1.85	1.85	4.924	4.924	4.924	P_KWMTBOMO05651	P_KWMTBOMO05651	P_KWMTBOMO05651	1
472	1.82	1.82	1.904	1.904	1.904	P_KWMTBOMO10508	P_KWMTBOMO10508	P_KWMTBOMO10508	1
473	1.81	1.81	10.98	5.341	3.264	P_KWMTBOMO01757	P_KWMTBOMO01757	P_KWMTBOMO01757	1
474	1.78	1.78	7.407	2.91	2.91	P_KWMTBOMO05509	P_KWMTBOMO05509	P_KWMTBOMO05509	1
475	1.77	1.77	4.492	1.176	1.176	P_KWMTBOMO14420	P_KWMTBOMO14420	P_KWMTBOMO14420	1
476	1.77	1.77	5.069	5.069	5.069	P_KWMTBOMO13597	P_KWMTBOMO13597	P_KWMTBOMO13597	1
477	1.73	1.73	10.49	6.214	2.524	P_KWMTBOMO07952	P_KWMTBOMO07952	P_KWMTBOMO07952	1
478	1.72	1.72	2.239	2.239	2.239	P_KWMTBOMO11689	P_KWMTBOMO11689	P_KWMTBOMO11689	1
479	1.68	1.68	6.638	1.587	1.587	P_KWMTBOMO13567	P_KWMTBOMO13567	P_KWMTBOMO13567	1
480	1.68	1.68	1.184	1.184	1.184	P_KWMTBOMO04543	P_KWMTBOMO04543	P_KWMTBOMO04543	1
481	1.66	1.66	7.273	7.273	7.273	P_KWMTBOMO01799	P_KWMTBOMO01799	P_KWMTBOMO01799	1
482	1.64	1.64	1.173	0.4399	0.4399	P_KWMTBOMO13925	P_KWMTBOMO13925	P_KWMTBOMO13925	1
483	1.64	1.64	6.17	2.553	2.553	P_KWMTBOMO04762	P_KWMTBOMO04762	P_KWMTBOMO04762	1
484	1.62	1.62	0.8989	0.8989	0.8989	P_KWMTBOMO14080	P_KWMTBOMO14080	P_KWMTBOMO14080	1
485	1.6	1.6	3.839	1.828	1.828	P_KWMTBOMO07294	P_KWMTBOMO07294	P_KWMTBOMO07294	1
486	1.59	1.59	11.93	2.752	2.752	P_KWMTBOMO01300	P_KWMTBOMO01300	P_KWMTBOMO01300	1
487	1.55	1.55	3.521	0.922	0.922	P_KWMTBOMO01579	P_KWMTBOMO01579	P_KWMTBOMO01579	1
488	1.55	1.55	5.96	5.96	5.96	P_KWMTBOMO03120	P_KWMTBOMO03120	P_KWMTBOMO03120	1
489	1.54	1.54	6.952	6.952	6.952	P_KWMTBOMO13713	P_KWMTBOMO13713	P_KWMTBOMO13713	1
490	1.49	1.49	3.916	3.916	3.916	P_KWMTBOMO07617	P_KWMTBOMO07617	P_KWMTBOMO07617	1
491	1.48	1.48	15.73	15.73	15.73	P_KWMTBOMO07685	P_KWMTBOMO07685	P_KWMTBOMO07685	1
492	1.42	1.42	18.69	12.15	12.15	P_KWMTBOMO10128	P_KWMTBOMO10128	P_KWMTBOMO10128	1
493	1.41	1.41	11.11	11.11	11.11	P_KWMTBOMO14850	P_KWMTBOMO14850	P_KWMTBOMO14850	1
494	1.4	1.4	6.584	6.584	6.584	P_KWMTBOMO00973	P_KWMTBOMO00973	P_KWMTBOMO00973	1
495	1.39	1.81	28.65	13.48	7.303	P_KWMTBOMO16126	P_KWMTBOMO16126	P_KWMTBOMO16126	1
496	1.37	1.37	0.8228	0.484	0.484	P_KWMTBOMO08552	P_KWMTBOMO08552	P_KWMTBOMO08552	1
497	1.36	1.36	20.14	20.14	11.26	P_KWMTBOMO01379	P_KWMTBOMO01379	P_KWMTBOMO01379	2
498	1.36	1.36	14.71	4.412	4.412	P_KWMTBOMO03656	P_KWMTBOMO03656	P_KWMTBOMO03656	1
499	1.35	1.35	1.518	0.308	0.308	P_KWMTBOMO06355	P_KWMTBOMO06355	P_KWMTBOMO06355	1
500	1.35	1.35	7.847	6.022	2.372	P_KWMTBOMO15629	P_KWMTBOMO15629	P_KWMTBOMO15629	1
501	1.35	1.35	9.444	9.444	9.444	P_KWMTBOMO06228	P_KWMTBOMO06228	P_KWMTBOMO06228	1
502	1.34	1.34	2.276	1.669	0.8346	P_KWMTBOMO15485	P_KWMTBOMO15485	P_KWMTBOMO15485	1
503	1.32	1.32	14.84	11.54	6.044	P_KWMTBOMO04529	P_KWMTBOMO04529	P_KWMTBOMO04529	1
504	1.31	1.31	12.4	12.4	6.977	P_KWMTBOMO03173	P_KWMTBOMO03173	P_KWMTBOMO03173	1
