# Supplementary material for: New insights into the proteins interacting with the promoters of silkworm fibroin genes
Source: Research Square preprint supplement (doi:10.21203/rs.3.rs-400247/v1), 2021-04-12
Supplement: Supplementary file 5 [file e724b61017e17ddf97221369.docx]

**Table 1. Summary of candidate PIPs identified by HPLC-MS**

| **Gene promoters** | **Developmental**  **stages** | **Control group**  **(GFP probe)** | **Control group**  **(unbiotinylated probe)** | **Experimental group**  **(biotinylated probe)** | **Specific PIPs** |
| --- | --- | --- | --- | --- | --- |
| ***fibH*** | M4 | 34 | 18 | 232 | 198 |
| L5D5 | 39 | 23 | 373 | 330 |
| ***fibL*** | M4 | 34 | 23 | 325 | 292 |
| L5D5 | 39 | 77 | 387 | 305 |
| ***P25*** | M4 | 34 | 40 | 291 | 247 |
| L5D5 | 39 | 28 | 504 | 460 |
