# Supplementary material for: New insights into the proteins interacting with the promoters of silkworm fibroin genes
Source: Research Square preprint supplement (doi:10.21203/rs.3.rs-400247/v1), 2021-04-12
Supplement: Supplementary file 7 [file 42a1a37f0fd44ae5400a9ca8.docx]

**Table 2. Potential TFs identified from the PIPs of fibroin genes**

| **Protein ID** | **Chromosome** | **Family/domain** | **Interacting promoters**  **in M4** | | | **Interacting promoters**  **in L5D5** | | |
| --- | --- | --- | --- | --- | --- | --- | --- | --- |
| P_KWMTBOMO00339 | Chr1 | CSD | *fibH* |  | *P25* | *fibH* |  | *P25* |
| P_KWMTBOMO00366 | Chr1 | TF_others | *fibH* | *fibL* | *P25* |  | *fibL* | *P25* |
| P_KWMTBOMO00497 | Chr1 | THAP | *fibH* | *fibL* | *P25* | *fibH* |  | *P25* |
| P_KWMTBOMO01796 | Chr4 | TF_others |  | *fibL* |  | *fibH* | *fibL* | *P25* |
| P_KWMTBOMO03626 | Chr6 | NCU-G1 | *fibH* | *fibL* | *P25* | *fibH* | *fibL* | *P25* |
| P_KWMTBOMO04742 | Chr8 | ETS | *fibH* |  | *P25* |  |  |  |
| P_KWMTBOMO04674 | Chr8 | HMG |  |  |  |  | *fibL* | *P25* |
| P_KWMTBOMO04757 | Chr8 | MBD |  |  |  |  |  | *P25* |
| P_KWMTBOMO04877 | Chr9 | MBD |  |  |  |  |  | *P25* |
| P_KWMTBOMO04966 | Chr9 | zf-C2H2 |  |  |  |  | *fibL* |  |
| P_KWMTBOMO05228 | Chr9 | zf-C2H2 |  |  |  |  |  | *P25* |
| P_KWMTBOMO05675 | Chr10 | zf-C2H2 | *fibH* | *fibL* | *P25* |  |  |  |
| P_KWMTBOMO05699 | Chr10 | zf-C2H2 |  |  |  |  | *fibL* |  |
| P_KWMTBOMO05810 | Chr10 | Nrf1 |  |  |  | *fibH* | *fibL* | *P25* |
| P_KWMTBOMO07323 | Chr12 | NCU-G1 |  | *fibL* | *P25* | *fibH* | *fibL* | *P25* |
| P_KWMTBOMO08022 | Chr13 | HMG |  | *fibL* | *P25* |  |  |  |
| P_KWMTBOMO08820 | Chr15 | TF_others | *fibH* | *fibL* | *P25* | *fibH* | *fibL* | *P25* |
| P_KWMTBOMO09050 | Chr15 | zf-C2H2 | *fibH* | *fibL* |  | *fibH* |  | *P25* |
| P_KWMTBOMO09808 | Chr16 | NCU-G1 | *fibH* | *fibL* | *P25* | *fibH* | *fibL* | *P25* |
| P_KWMTBOMO10147 | Chr17 | TF_others |  |  |  |  |  | *P25* |
| P_KWMTBOMO11061 | Chr18 | TF_others | *fibH* | *fibL* | *P25* | *fibH* | *fibL* | *P25* |
| P_KWMTBOMO11731 | Chr19 | HMG | *fibH* | *fibL* | *P25* |  |  |  |
| P_KWMTBOMO12659 | Chr21 | NCU-G1 | *fibH* | *fibL* | *P25* | *fibH* |  | *P25* |
| P_KWMTBOMO14887 | Chr24 | NCU-G1 |  | *fibL* | *P25* | *fibH* | *fibL* | *P25* |
| P_KWMTBOMO15035 | Chr25 | THAP |  |  |  |  |  | *P25* |
| P_KWMTBOMO15757 | Chr26 | Homeobox |  |  |  | *fibH* |  | *P25* |
| P_KWMTBOMO15758 | Chr26 | Homeobox | *fibH* | *fibL* | *P25* | *fibH* | *fibL* | *P25* |
| P_KWMTBOMO15781 | Chr26 | THAP |  | *fibL* |  | *fibH* | *fibL* | *P25* |
| P_KWMTBOMO15928 | Chr27 | bHLH |  | *fibL* |  |  |  | *P25* |
| P_KWMTBOMO16040 | Chr27 | TF_others |  | *fibL* | *P25* |  |  | *P25* |
| P_KWMTBOMO16524 | Scaf007 | TF_others | *fibH* | *fibL* | *P25* |  | *fibL* |  |
